# Supplementary material for: Copper-catalyzed enantioselective 1,4-addition of alkyl groups to N-sulfonyl imines
Source: Royal Society of Chemistry journal article supplement (doi:10.1039/c4cc07134d), 2014-09-25
Supplement: c4cc07134d1.pdf [file c4cc07134d1.pdf]

| time (hh:mm:ss) | educt (signal intensity) | product (signal intensity) |          |             |             |
|-----------------|--------------------------|----------------------------|----------|-------------|-------------|
| 00:00:02        | 0.182984083              | -0,000372183               | 00:00:11 | 0.181497901 | 0,000107538 |
| 00:00:02        | 0.184675777              | -0,000178212               | 00:00:11 | 0.181400391 | 0,000103664 |
| 00:00:02        | 0.183532775              | -0,000280403               | 00:00:11 | 0.181298589 | 9,69E-05    |
| 00:00:03        | 0.184137572              | -0,000171341               | 00:00:11 | 0.181528846 | 0,000113123 |
| 00:00:03        | 0.184022903              | -0,000322587               | 00:00:12 | 0.18148739  | 0,000116397 |
| 00:00:03        | 0.183668152              | -0,00033895                | 00:00:12 | 0.181423637 | 0,000127517 |
| 00:00:03        | 0.184845367              | -7,62E-05                  | 00:00:12 | 0.180808446 | 6,73E-05    |
| 00:00:03        | 0.183146977              | -0,000208402               | 00:00:12 | 0.18082008  | 7,06E-05    |
| 00:00:04        | 0.182932497              | -0,000148159               | 00:00:12 | 0.18080796  | 7,96E-05    |
| 00:00:04        | 0.18313382               | -8,88E-06                  | 00:00:13 | 0.180859692 | 0,000102997 |
| 00:00:04        | 0.181877127              | -0,000101027               | 00:00:13 | 0.180880214 | 0,00012335  |
| 00:00:04        | 0.182607595              | 2,93E-05                   | 00:00:13 | 0.180878808 | 0,000126502 |
| 00:00:04        | 0.183415436              | 9,57E-05                   | 00:00:13 | 0.181134326 | 0,000160884 |
| 00:00:04        | 0.182387288              | 7,38E-05                   | 00:00:13 | 0.181094353 | 0,000145165 |
| 00:00:05        | 0.182708345              | 0,000154717                | 00:00:14 | 0.181139921 | 0,000158936 |
| 00:00:05        | 0.182686863              | 0,000166792                | 00:00:14 | 0.180837878 | 0,0001429   |
| 00:00:05        | 0.182336478              | 0,000195361                | 00:00:14 | 0.180858648 | 0,000143332 |
| 00:00:05        | 0.1822345                | 0,000209667                | 00:00:14 | 0.18084267  | 0,000143915 |
| 00:00:05        | 0.182118727              | 0,00024892                 | 00:00:14 | 0.181062532 | 0,000183145 |
| 00:00:06        | 0.182497751              | 0,000286021                | 00:00:15 | 0.181441316 | 0,0002178   |
| 00:00:06        | 0.181934585              | 0,000235319                | 00:00:15 | 0.181444957 | 0,000210729 |
| 00:00:06        | 0.181994351              | 0,00027434                 | 00:00:15 | 0.18142173  | 0,00022206  |
| 00:00:06        | 0.181961583              | 0,000213263                | 00:00:15 | 0.181402239 | 0,000220602 |
| 00:00:06        | 0.181605259              | 0,000191302                | 00:00:15 | 0.181414009 | 0,000216093 |
| 00:00:07        | 0.181296749              | 0,00014838                 | 00:00:16 | 0.181414944 | 0,000222235 |
| 00:00:07        | 0.181581689              | 0,000129261                | 00:00:16 | 0.181409018 | 0,000222069 |
| 00:00:07        | 0.181163541              | 4,31E-05                   | 00:00:16 | 0.181411401 | 0,000219076 |
| 00:00:07        | 0.181130907              | 7,94E-05                   | 00:00:16 | 0.181408554 | 0,00021717  |
| 00:00:07        | 0.181041467              | 7,81E-05                   | 00:00:16 | 0.181403155 | 0,000224992 |
| 00:00:08        | 0.180712909              | 4,68E-05                   | 00:00:17 | 0.1814029   | 0,000232247 |
| 00:00:08        | 0.180672475              | 5,64E-05                   | 00:00:17 | 0.18139821  | 0,000242866 |
| 00:00:08        | 0.180927283              | 6,47E-05                   | 00:00:17 | 0.181405343 | 0,000249041 |
| 00:00:08        | 0.180845855              | 7,73E-05                   | 00:00:17 | 0.181400349 | 0,000251626 |
| 00:00:08        | 0.181681111              | 0,0001527                  | 00:00:17 | 0.181315558 | 0,000234443 |
| 00:00:09        | 0.181668434              | 0,000171339                | 00:00:18 | 0.180949713 | 0,000312727 |
| 00:00:09        | 0.18166658               | 0,00014057                 | 00:00:18 | 0.181059656 | 0,000446597 |
| 00:00:09        | 0.181627844              | 0,000130948                | 00:00:18 | 0.180570132 | 0,000399543 |
| 00:00:09        | 0.181601034              | 0,000121                   | 00:00:18 | 0.180707975 | 0,00040623  |
| 00:00:09        | 0.1815374                | 0,000131798                | 00:00:18 | 0.180435033 | 0,000371184 |
| 00:00:10        | 0.181614093              | 0,000131336                | 00:00:19 | 0.180460367 | 0,000392519 |
| 00:00:10        | 0.181458847              | 0,000115427                | 00:00:19 | 0.180571645 | 0,000394728 |
| 00:00:10        | 0.181469997              | 0,000118718                | 00:00:19 | 0.180372817 | 0,000365345 |
| 00:00:10        | 0.18153832               | 0,000119446                | 00:00:19 | 0.18037403  | 0,000376321 |
| 00:00:10        | 0.181545937              | 0,00011818                 | 00:00:19 | 0.180312781 | 0,000370794 |
| 00:00:11        | 0.181594526              | 0,000116501                | 00:00:19 | 0.180204603 | 0,000361586 |
|                 |                          |                            | 00:00:20 | 0.180318392 | 0,000373846 |

|          |             |             |          |             |             |
|----------|-------------|-------------|----------|-------------|-------------|
| 00:00:20 | 0.180290454 | 0,00037559  | 00:00:29 | 0.180021229 | 0,000612881 |
| 00:00:20 | 0.18057502  | 0,000391636 | 00:00:29 | 0.179990178 | 0,000598544 |
| 00:00:20 | 0.180350907 | 0,000363743 | 00:00:29 | 0.179754526 | 0,000578305 |
| 00:00:20 | 0.180500294 | 0,000366702 | 00:00:30 | 0.179706305 | 0,000560554 |
| 00:00:21 | 0.180304665 | 0,000348262 | 00:00:30 | 0.179813675 | 0,000624886 |
| 00:00:21 | 0.180111555 | 0,0003241   | 00:00:30 | 0.179777167 | 0,000623395 |
| 00:00:21 | 0.180171516 | 0,00032816  | 00:00:30 | 0.179827328 | 0,000610364 |
| 00:00:21 | 0.18019954  | 0,000413226 | 00:00:30 | 0.179852105 | 0,000608891 |
| 00:00:22 | 0.180162065 | 0,000410441 | 00:00:31 | 0.179883228 | 0,000605163 |
| 00:00:22 | 0.18015126  | 0,000412556 | 00:00:31 | 0.179688396 | 0,000588234 |
| 00:00:22 | 0.18025418  | 0,000422219 | 00:00:31 | 0.179690213 | 0,000580827 |
| 00:00:22 | 0.180218904 | 0,000414772 | 00:00:31 | 0.17952716  | 0,000564408 |
| 00:00:22 | 0.180340991 | 0,000426229 | 00:00:31 | 0.179456546 | 0,000558121 |
| 00:00:22 | 0.180285316 | 0,000418943 | 00:00:32 | 0.17945874  | 0,000556349 |
| 00:00:23 | 0.180190616 | 0,000404909 | 00:00:32 | 0.179462005 | 0,000559048 |
| 00:00:23 | 0.180209775 | 0,000399648 | 00:00:32 | 0.179447436 | 0,000558833 |
| 00:00:23 | 0.180153607 | 0,000389696 | 00:00:32 | 0.179375391 | 0,000558141 |
| 00:00:23 | 0.180014228 | 0,000376186 | 00:00:32 | 0.179383767 | 0,00056127  |
| 00:00:24 | 0.179923304 | 0,000368509 | 00:00:33 | 0.179339824 | 0,000572876 |
| 00:00:24 | 0.180123266 | 0,000395817 | 00:00:33 | 0.179291807 | 0,000575455 |
| 00:00:24 | 0.180110801 | 0,000387779 | 00:00:33 | 0.179234231 | 0,000576945 |
| 00:00:24 | 0.180125551 | 0,00038591  | 00:00:33 | 0.1791357   | 0,000574462 |
| 00:00:24 | 0.1801054   | 0,000456377 | 00:00:33 | 0.179043127 | 0,000627573 |
| 00:00:24 | 0.180111362 | 0,000460681 | 00:00:34 | 0.178999727 | 0,000630875 |
| 00:00:25 | 0.180109609 | 0,000462473 | 00:00:34 | 0.179007992 | 0,000648154 |
| 00:00:25 | 0.180121219 | 0,000463541 | 00:00:34 | 0.178968531 | 0,000666315 |
| 00:00:25 | 0.180113128 | 0,000466853 | 00:00:34 | 0.178901822 | 0,000686895 |
| 00:00:25 | 0.180061473 | 0,000465733 | 00:00:34 | 0.178896041 | 0,00071951  |
| 00:00:25 | 0.180054183 | 0,000464068 | 00:00:35 | 0.178801594 | 0,000752641 |
| 00:00:26 | 0.180098047 | 0,000459598 | 00:00:35 | 0.17859282  | 0,000780724 |
| 00:00:26 | 0.18007046  | 0,000525698 | 00:00:35 | 0.178530507 | 0,000830393 |
| 00:00:26 | 0.179983028 | 0,000515707 | 00:00:35 | 0.17834132  | 0,000878957 |
| 00:00:26 | 0.180054895 | 0,000525882 | 00:00:35 | 0.178255212 | 0,000998453 |
| 00:00:26 | 0.180007698 | 0,000517919 | 00:00:36 | 0.178074436 | 0,001067287 |
| 00:00:27 | 0.180136651 | 0,000531086 | 00:00:36 | 0.177830325 | 0,001151314 |
| 00:00:27 | 0.18025432  | 0,000607426 | 00:00:36 | 0.177623551 | 0,001242978 |
| 00:00:27 | 0.18044686  | 0,000625688 | 00:00:36 | 0.17743309  | 0,001345907 |
| 00:00:27 | 0.180879266 | 0,000658271 | 00:00:36 | 0.177161449 | 0,001445128 |
| 00:00:27 | 0.18087867  | 0,000661306 | 00:00:37 | 0.176904834 | 0,00155157  |
| 00:00:28 | 0.180890485 | 0,000652634 | 00:00:37 | 0.17670441  | 0,001672051 |
| 00:00:28 | 0.180859657 | 0,000714717 | 00:00:37 | 0.176500397 | 0,001801458 |
| 00:00:28 | 0.180853898 | 0,000705521 | 00:00:37 | 0.1761349   | 0,001965308 |
| 00:00:28 | 0.180723545 | 0,000691147 | 00:00:37 | 0.175830396 | 0,0020965   |
| 00:00:28 | 0.180488836 | 0,0006595   | 00:00:38 | 0.175600715 | 0,002232919 |
| 00:00:29 | 0.180617907 | 0,00066777  | 00:00:38 | 0.175330201 | 0,002380886 |
| 00:00:29 | 0.18046029  | 0,000649043 | 00:00:38 | 0.175030325 | 0,002531084 |

|          |             |             |          |             |             |
|----------|-------------|-------------|----------|-------------|-------------|
| 00:00:38 | 0.174717463 | 0,00272202  | 00:00:47 | 0.156615488 | 0,011622458 |
| 00:00:38 | 0.174435525 | 0,002882017 | 00:00:47 | 0.156202056 | 0,011825648 |
| 00:00:38 | 0.174104434 | 0,003083626 | 00:00:48 | 0.155774341 | 0,012052306 |
| 00:00:39 | 0.173738988 | 0,003245344 | 00:00:48 | 0.155395575 | 0,012286996 |
| 00:00:39 | 0.173423884 | 0,003413097 | 00:00:48 | 0.154980863 | 0,012485193 |
| 00:00:39 | 0.173046785 | 0,003575262 | 00:00:48 | 0.154519914 | 0,012671635 |
| 00:00:39 | 0.172853518 | 0,003805739 | 00:00:48 | 0.154087574 | 0,012860013 |
| 00:00:39 | 0.17269507  | 0,003993978 | 00:00:49 | 0.153619002 | 0,013074539 |
| 00:00:40 | 0.172404493 | 0,004164831 | 00:00:49 | 0.153198072 | 0,013268883 |
| 00:00:40 | 0.171822067 | 0,004312292 | 00:00:49 | 0.152793399 | 0,013464912 |
| 00:00:40 | 0.171506    | 0,004516151 | 00:00:49 | 0.152406102 | 0,013660755 |
| 00:00:40 | 0.170965234 | 0,004669458 | 00:00:49 | 0.15198262  | 0,013850266 |
| 00:00:40 | 0.170555302 | 0,004834943 | 00:00:50 | 0.151569195 | 0,014038284 |
| 00:00:41 | 0.170205078 | 0,00500465  | 00:00:50 | 0.151147184 | 0,014258953 |
| 00:00:41 | 0.169851723 | 0,005214727 | 00:00:50 | 0.150736406 | 0,014477152 |
| 00:00:41 | 0.169518687 | 0,005391125 | 00:00:50 | 0.150319325 | 0,014663974 |
| 00:00:41 | 0.169266775 | 0,00557687  | 00:00:50 | 0.149911847 | 0,014879965 |
| 00:00:41 | 0.168915838 | 0,005762211 | 00:00:51 | 0.149515597 | 0,015099606 |
| 00:00:42 | 0.168406573 | 0,005936077 | 00:00:51 | 0.149111859 | 0,015287713 |
| 00:00:42 | 0.167960777 | 0,00611434  | 00:00:51 | 0.14870489  | 0,015478724 |
| 00:00:42 | 0.16756035  | 0,006303863 | 00:00:51 | 0.148299826 | 0,015667073 |
| 00:00:42 | 0.167088352 | 0,006480778 | 00:00:51 | 0.147892351 | 0,015859212 |
| 00:00:42 | 0.166646888 | 0,006666324 | 00:00:52 | 0.147493844 | 0,01607558  |
| 00:00:43 | 0.1662204   | 0,006892425 | 00:00:52 | 0.14709391  | 0,016260639 |
| 00:00:43 | 0.165820768 | 0,007080285 | 00:00:52 | 0.146702061 | 0,016448769 |
| 00:00:43 | 0.165383469 | 0,007301654 | 00:00:52 | 0.146307902 | 0,016632015 |
| 00:00:43 | 0.164860252 | 0,007488593 | 00:00:52 | 0.14591597  | 0,016843119 |
| 00:00:43 | 0.16446539  | 0,007680952 | 00:00:53 | 0.145628477 | 0,017041367 |
| 00:00:44 | 0.16407427  | 0,007876351 | 00:00:53 | 0.145224021 | 0,017247432 |
| 00:00:44 | 0.163669317 | 0,008111515 | 00:00:53 | 0.144821744 | 0,017425048 |
| 00:00:44 | 0.16324874  | 0,00834483  | 00:00:53 | 0.144412584 | 0,017604808 |
| 00:00:44 | 0.162843399 | 0,008540649 | 00:00:53 | 0.143969584 | 0,017783607 |
| 00:00:44 | 0.162403238 | 0,008740057 | 00:00:54 | 0.143587214 | 0,01799213  |
| 00:00:45 | 0.161990077 | 0,00897082  | 00:00:54 | 0.143209966 | 0,018174776 |
| 00:00:45 | 0.161508628 | 0,009156176 | 00:00:54 | 0.142819997 | 0,018358258 |
| 00:00:45 | 0.161078352 | 0,009349719 | 00:00:54 | 0.142426399 | 0,0185641   |
| 00:00:45 | 0.160667805 | 0,009549432 | 00:00:54 | 0.142023048 | 0,018764718 |
| 00:00:45 | 0.160253713 | 0,009749535 | 00:00:55 | 0.141632702 | 0,01894954  |
| 00:00:46 | 0.159819984 | 0,009946369 | 00:00:55 | 0.1412461   | 0,01913295  |
| 00:00:46 | 0.159403995 | 0,010144852 | 00:00:55 | 0.140863959 | 0,019312163 |
| 00:00:46 | 0.159064677 | 0,010344174 | 00:00:55 | 0.140471873 | 0,019517122 |
| 00:00:46 | 0.158602543 | 0,010573481 | 00:00:55 | 0.140104493 | 0,019693005 |
| 00:00:46 | 0.158220193 | 0,01076955  | 00:00:56 | 0.13985957  | 0,019882783 |
| 00:00:47 | 0.157835509 | 0,011003063 | 00:00:56 | 0.139526536 | 0,020093853 |
| 00:00:47 | 0.157423035 | 0,011233251 | 00:00:56 | 0.139169045 | 0,020303001 |
| 00:00:47 | 0.157022046 | 0,011425278 | 00:00:56 | 0.138810704 | 0,02047796  |

|          |             |             |          |             |             |
|----------|-------------|-------------|----------|-------------|-------------|
| 00:00:56 | 0.138413175 | 0,020653027 | 00:01:05 | 0.12353074  | 0,028779417 |
| 00:00:56 | 0.137930152 | 0,020820675 | 00:01:06 | 0.123247473 | 0,028954093 |
| 00:00:57 | 0.137580212 | 0,020995411 | 00:01:06 | 0.122983899 | 0,029129994 |
| 00:00:57 | 0.137226044 | 0,021196526 | 00:01:06 | 0.122742591 | 0,029308671 |
| 00:00:57 | 0.136874907 | 0,021372897 | 00:01:06 | 0.122515629 | 0,029472365 |
| 00:00:57 | 0.136628458 | 0,021585203 | 00:01:06 | 0.12225226  | 0,029624246 |
| 00:00:58 | 0.136289253 | 0,021764298 | 00:01:07 | 0.122009371 | 0,029805297 |
| 00:00:58 | 0.136004394 | 0,021938298 | 00:01:07 | 0.121753023 | 0,029977357 |
| 00:00:58 | 0.135661052 | 0,022127031 | 00:01:07 | 0.121499839 | 0,030130777 |
| 00:00:58 | 0.135141684 | 0,022289036 | 00:01:07 | 0.121246869 | 0,030299438 |
| 00:00:58 | 0.134977632 | 0,022500063 | 00:01:07 | 0.120990448 | 0,030454141 |
| 00:00:58 | 0.134637431 | 0,022672542 | 00:01:08 | 0.12074397  | 0,030607975 |
| 00:00:59 | 0.134292515 | 0,022863016 | 00:01:08 | 0.120486252 | 0,030761804 |
| 00:00:59 | 0.133959292 | 0,023035138 | 00:01:08 | 0.120240309 | 0,030931677 |
| 00:00:59 | 0.133620978 | 0,023232256 | 00:01:08 | 0.119988753 | 0,03108549  |
| 00:00:59 | 0.133291958 | 0,023400803 | 00:01:08 | 0.119751863 | 0,031254603 |
| 00:00:59 | 0.1328097   | 0,023561981 | 00:01:09 | 0.11895916  | 0,03141841  |
| 00:01:00 | 0.132450759 | 0,023751512 | 00:01:09 | 0.11843367  | 0,03154421  |
| 00:01:00 | 0.132136051 | 0,023924967 | 00:01:09 | 0.118070159 | 0,031702286 |
| 00:01:00 | 0.131815438 | 0,024114404 | 00:01:09 | 0.117818534 | 0,03185045  |
| 00:01:00 | 0.131503125 | 0,024303424 | 00:01:09 | 0.117566563 | 0,031999543 |
| 00:01:00 | 0.131201254 | 0,024470533 | 00:01:10 | 0.117300555 | 0,032161809 |
| 00:01:01 | 0.130890993 | 0,024659928 | 00:01:10 | 0.11730984  | 0,032350447 |
| 00:01:01 | 0.13059886  | 0,024824725 | 00:01:10 | 0.117047101 | 0,032515416 |
| 00:01:01 | 0.130168573 | 0,025005241 | 00:01:10 | 0.11679496  | 0,032659489 |
| 00:01:01 | 0.129998703 | 0,025205845 | 00:01:10 | 0.116535735 | 0,032817999 |
| 00:01:01 | 0.129691806 | 0,025370855 | 00:01:11 | 0.116277872 | 0,032981764 |
| 00:01:02 | 0.129220915 | 0,025519675 | 00:01:11 | 0.116029867 | 0,033125817 |
| 00:01:02 | 0.128907559 | 0,025704764 | 00:01:11 | 0.115771351 | 0,033289883 |
| 00:01:02 | 0.128597487 | 0,025869358 | 00:01:11 | 0.115357979 | 0,033433308 |
| 00:01:02 | 0.128290511 | 0,026034097 | 00:01:11 | 0.115241717 | 0,033605761 |
| 00:01:02 | 0.127989647 | 0,026195867 | 00:01:12 | 0.114802084 | 0,033749631 |
| 00:01:03 | 0.127687152 | 0,026380875 | 00:01:12 | 0.114523311 | 0,033890689 |
| 00:01:03 | 0.127382456 | 0,026563374 | 00:01:12 | 0.114285489 | 0,034047446 |
| 00:01:03 | 0.127076322 | 0,026744023 | 00:01:12 | 0.114039432 | 0,034208717 |
| 00:01:03 | 0.126774642 | 0,026927906 | 00:01:12 | 0.113791818 | 0,034364978 |
| 00:01:03 | 0.126470959 | 0,02710883  | 00:01:13 | 0.113561158 | 0,034510119 |
| 00:01:04 | 0.126170697 | 0,027283334 | 00:01:13 | 0.113416135 | 0,03467729  |
| 00:01:04 | 0.125868663 | 0,027460666 | 00:01:13 | 0.113172169 | 0,034820089 |
| 00:01:04 | 0.125567699 | 0,027621467 | 00:01:13 | 0.112913731 | 0,034972387 |
| 00:01:04 | 0.125272941 | 0,027782367 | 00:01:13 | 0.112671486 | 0,035112365 |
| 00:01:04 | 0.124990189 | 0,027939504 | 00:01:14 | 0.112419545 | 0,035264621 |
| 00:01:05 | 0.124691994 | 0,028114635 | 00:01:14 | 0.112147415 | 0,035402145 |
| 00:01:05 | 0.124392862 | 0,028292566 | 00:01:14 | 0.111911586 | 0,035555784 |
| 00:01:05 | 0.12410724  | 0,02845103  | 00:01:14 | 0.11167608  | 0,035707427 |
| 00:01:05 | 0.123813017 | 0,028623981 | 00:01:14 | 0.111442207 | 0,035860818 |

|          |             |             |          |                     |             |
|----------|-------------|-------------|----------|---------------------|-------------|
| 00:01:14 | 0.111218706 | 0,036000196 | 00:01:24 | 0.101752596         | 0,042265008 |
| 00:01:15 | 0.110982972 | 0,036154591 | 00:01:24 | 0.101603144         | 0,042392905 |
| 00:01:15 | 0.110760923 | 0,036291518 | 00:01:24 | 0.101408741         | 0,042525658 |
| 00:01:15 | 0.110545854 | 0,036426769 | 00:01:24 | 0.101240195         | 0,04264698  |
| 00:01:15 | 0.110319771 | 0,036579191 | 00:01:24 | 0.101058043         | 0,042777608 |
| 00:01:15 | 0.110097006 | 0,036712426 | 00:01:25 | 0.100853368         | 0,042908182 |
| 00:01:16 | 0.109885876 | 0,03684723  | 00:01:25 | 0.100667145         | 0,043039758 |
| 00:01:16 | 0.109664346 | 0,036995914 | 00:01:25 | 0.100479866         | 0,043171131 |
| 00:01:16 | 0.10943584  | 0,037143019 | 00:01:25 | 0.100289639         | 0,043300367 |
| 00:01:16 | 0.109228692 | 0,037280532 | 00:01:25 | 0.100124016         | 0,043432832 |
| 00:01:17 | 0.109017374 | 0,037413237 | 00:01:26 | 0.09996557          | 0,043563249 |
| 00:01:17 | 0.108798683 | 0,037550457 | 00:01:26 | 0.099797577         | 0,043693642 |
| 00:01:17 | 0.108580437 | 0,037697291 | 00:01:26 | 0.09960253500000001 | 0,043815977 |
| 00:01:17 | 0.108376082 | 0,037831108 | 00:01:26 | 0.099442298         | 0,043945574 |
| 00:01:17 | 0.108168808 | 0,037966263 | 00:01:26 | 0.09927298800000001 | 0,044078442 |
| 00:01:17 | 0.107946695 | 0,038112737 | 00:01:27 | 0.099119886         | 0,044208264 |
| 00:01:18 | 0.107728257 | 0,038259365 | 00:01:27 | 0.09894237          | 0,044334101 |
| 00:01:18 | 0.107510858 | 0,038402661 | 00:01:27 | 0.098795494         | 0,044454448 |
| 00:01:18 | 0.107308717 | 0,038535877 | 00:01:27 | 0.098640772         | 0,044582942 |
| 00:01:18 | 0.10709404  | 0,038678345 | 00:01:27 | 0.09846849100000001 | 0,044708921 |
| 00:01:18 | 0.106886578 | 0,0388068   | 00:01:28 | 0.09829518700000001 | 0,044836381 |
| 00:01:19 | 0.106674072 | 0,038951522 | 00:01:28 | 0.098154981         | 0,044953965 |
| 00:01:19 | 0.106460462 | 0,039093781 | 00:01:28 | 0.098003612         | 0,045068256 |
| 00:01:19 | 0.106245385 | 0,039235258 | 00:01:28 | 0.097848463         | 0,045196137 |
| 00:01:19 | 0.10603549  | 0,039379094 | 00:01:28 | 0.097695647         | 0,045322654 |
| 00:01:19 | 0.10583381  | 0,039507003 | 00:01:29 | 0.09754731899999999 | 0,045435038 |
| 00:01:20 | 0.105624142 | 0,039646726 | 00:01:29 | 0.09737080200000001 | 0,045559607 |
| 00:01:20 | 0.105429071 | 0,039774031 | 00:01:29 | 0.09719712          | 0,045685347 |
| 00:01:20 | 0.105229867 | 0,039900223 | 00:01:29 | 0.097022635         | 0,045806978 |
| 00:01:20 | 0.105039344 | 0,040029527 | 00:01:29 | 0.096844214         | 0,045927144 |
| 00:01:20 | 0.104848641 | 0,040157997 | 00:01:30 | 0.096680984         | 0,046050537 |
| 00:01:21 | 0.104639504 | 0,040295774 | 00:01:30 | 0.096526393         | 0,046174005 |
| 00:01:21 | 0.104434813 | 0,040431883 | 00:01:30 | 0.09639968          | 0,046300237 |
| 00:01:21 | 0.104247309 | 0,040560639 | 00:01:30 | 0.096255495         | 0,046424116 |
| 00:01:21 | 0.104059275 | 0,040689317 | 00:01:30 | 0.096093734         | 0,046544472 |
| 00:01:21 | 0.103857438 | 0,040824573 | 00:01:31 | 0.095943732         | 0,046655982 |
| 00:01:22 | 0.103653501 | 0,040966993 | 00:01:31 | 0.095765536         | 0,046776834 |
| 00:01:22 | 0.10347132  | 0,041093281 | 00:01:31 | 0.095590387         | 0,046899935 |
| 00:01:22 | 0.103286789 | 0,041220941 | 00:01:31 | 0.09541661899999999 | 0,047009397 |
| 00:01:22 | 0.103082401 | 0,041357197 | 00:01:31 | 0.09526992099999999 | 0,047133594 |
| 00:01:22 | 0.102879316 | 0,041495976 | 00:01:32 | 0.095140378         | 0,047248476 |
| 00:01:23 | 0.102688143 | 0,041631332 | 00:01:32 | 0.094980729         | 0,047368801 |
| 00:01:23 | 0.102493698 | 0,041767574 | 00:01:32 | 0.09484614800000001 | 0,047489865 |
| 00:01:23 | 0.102308271 | 0,041892518 | 00:01:32 | 0.094684406         | 0,047606601 |
| 00:01:23 | 0.102129219 | 0,042012461 | 00:01:32 | 0.09452190100000001 | 0,047715274 |
| 00:01:23 | 0.101933938 | 0,04214269  | 00:01:33 | 0.094355144         | 0,047831895 |

|          |                     |             |          |                     |             |
|----------|---------------------|-------------|----------|---------------------|-------------|
| 00:01:33 | 0.09419683299999999 | 0,047950674 | 00:01:42 | 0.087512017         | 0,052922376 |
| 00:01:33 | 0.094059818         | 0,048068521 | 00:01:42 | 0.087375364         | 0,05302554  |
| 00:01:33 | 0.09389840100000001 | 0,04818682  | 00:01:42 | 0.087245025         | 0,053131363 |
| 00:01:33 | 0.093744592         | 0,048295717 | 00:01:42 | 0.087116073         | 0,053235009 |
| 00:01:34 | 0.09360768799999999 | 0,048413497 | 00:01:43 | 0.086997668         | 0,05333269  |
| 00:01:34 | 0.093455974         | 0,04852952  | 00:01:43 | 0.08685912699999999 | 0,053435739 |
| 00:01:34 | 0.093317067         | 0,048648071 | 00:01:43 | 0.086886904         | 0,053551935 |
| 00:01:34 | 0.09316703899999999 | 0,04876065  | 00:01:43 | 0.08675158500000001 | 0,053643908 |
| 00:01:34 | 0.093016218         | 0,048874999 | 00:01:43 | 0.086608266         | 0,053744728 |
| 00:01:34 | 0.092882299         | 0,048991187 | 00:01:44 | 0.08647158000000001 | 0,053843832 |
| 00:01:35 | 0.09274882299999999 | 0,049112122 | 00:01:44 | 0.08634609          | 0,053939672 |
| 00:01:35 | 0.09262035          | 0,049229406 | 00:01:44 | 0.08610618          | 0,054031845 |
| 00:01:35 | 0.092479781         | 0,049343955 | 00:01:44 | 0.085994458         | 0,054126919 |
| 00:01:35 | 0.092323766         | 0,049456455 | 00:01:44 | 0.085867793         | 0,054227242 |
| 00:01:35 | 0.09219434          | 0,049563103 | 00:01:45 | 0.085740132         | 0,05432696  |
| 00:01:36 | 0.092032998         | 0,049671535 | 00:01:45 | 0.085611558         | 0,05442804  |
| 00:01:36 | 0.09190833900000001 | 0,049784016 | 00:01:45 | 0.085481746         | 0,054530812 |
| 00:01:36 | 0.091772064         | 0,049886458 | 00:01:45 | 0.085355629         | 0,054631696 |
| 00:01:36 | 0.09166129000000001 | 0,049990825 | 00:01:45 | 0.08523467799999999 | 0,054734991 |
| 00:01:36 | 0.09151524900000001 | 0,050102112 | 00:01:46 | 0.08512038          | 0,054826848 |
| 00:01:37 | 0.091371855         | 0,050216203 | 00:01:46 | 0.08500258500000001 | 0,05492519  |
| 00:01:37 | 0.091234015         | 0,050325465 | 00:01:46 | 0.08489192499999999 | 0,055016771 |
| 00:01:37 | 0.091103158         | 0,050427619 | 00:01:46 | 0.084769753         | 0,055116262 |
| 00:01:37 | 0.090973758         | 0,050538052 | 00:01:46 | 0.084659173         | 0,055209207 |
| 00:01:37 | 0.09084697999999999 | 0,050649218 | 00:01:47 | 0.084534821         | 0,055309621 |
| 00:01:38 | 0.090694024         | 0,050757019 | 00:01:47 | 0.08442495699999999 | 0,055401963 |
| 00:01:38 | 0.090539338         | 0,050864598 | 00:01:47 | 0.084317351         | 0,055494515 |
| 00:01:38 | 0.09040363899999999 | 0,050975939 | 00:01:47 | 0.08419556          | 0,055591809 |
| 00:01:38 | 0.090250809         | 0,051084318 | 00:01:47 | 0.084074812         | 0,055690064 |
| 00:01:38 | 0.090113244         | 0,051194471 | 00:01:47 | 0.08395348599999999 | 0,055785945 |
| 00:01:39 | 0.0899703           | 0,051302619 | 00:01:48 | 0.08383225900000001 | 0,055882921 |
| 00:01:39 | 0.08982908100000001 | 0,05141037  | 00:01:48 | 0.083711829         | 0,055978605 |
| 00:01:39 | 0.089720488         | 0,051513699 | 00:01:48 | 0.083594485         | 0,056074061 |
| 00:01:39 | 0.08957296100000001 | 0,051619322 | 00:01:48 | 0.083476145         | 0,056167367 |
| 00:01:39 | 0.089423063         | 0,051723152 | 00:01:48 | 0.08337143399999999 | 0,056258617 |
| 00:01:40 | 0.089268897         | 0,051819137 | 00:01:49 | 0.08326502099999999 | 0,056348815 |
| 00:01:40 | 0.089117814         | 0,051916408 | 00:01:49 | 0.083157435         | 0,056437327 |
| 00:01:40 | 0.088974601         | 0,052013263 | 00:01:49 | 0.083041852         | 0,056532019 |
| 00:01:40 | 0.088815508         | 0,052114424 | 00:01:49 | 0.082921012         | 0,056627649 |
| 00:01:40 | 0.088659427         | 0,052220421 | 00:01:50 | 0.082805622         | 0,056722529 |
| 00:01:41 | 0.08851126300000001 | 0,052326414 | 00:01:50 | 0.08268861499999999 | 0,056816116 |
| 00:01:41 | 0.088329775         | 0,052430387 | 00:01:50 | 0.08257157800000001 | 0,056909196 |
| 00:01:41 | 0.08814121499999999 | 0,052530494 | 00:01:50 | 0.082459238         | 0,057002051 |
| 00:01:41 | 0.087939271         | 0,052626798 | 00:01:50 | 0.082342885         | 0,05709593  |
| 00:01:41 | 0.087780619         | 0,052722804 | 00:01:50 | 0.08223478100000001 | 0,057181285 |
| 00:01:42 | 0.08762648100000001 | 0,052823891 | 00:01:51 | 0.08212129          | 0,057273127 |

|          |                     |             |          |                     |             |
|----------|---------------------|-------------|----------|---------------------|-------------|
| 00:01:51 | 0.082007101         | 0,057364207 | 00:02:00 | 0.07719479          | 0,061413871 |
| 00:01:51 | 0.081894445         | 0,057457342 | 00:02:00 | 0.077093727         | 0,061497889 |
| 00:01:51 | 0.081778241         | 0,057550177 | 00:02:00 | 0.076994678         | 0,061581336 |
| 00:01:52 | 0.081664218         | 0,057643418 | 00:02:01 | 0.07690372700000001 | 0,061658072 |
| 00:01:52 | 0.08155952399999999 | 0,05773745  | 00:02:01 | 0.076809221         | 0,06173758  |
| 00:01:52 | 0.08144517499999999 | 0,057830938 | 00:02:01 | 0.07670279300000001 | 0,061820913 |
| 00:01:52 | 0.081334711         | 0,05792412  | 00:02:01 | 0.076598624         | 0,061904862 |
| 00:01:52 | 0.081221578         | 0,058014832 | 00:02:01 | 0.076497572         | 0,061990368 |
| 00:01:52 | 0.08111338999999999 | 0,058105061 | 00:02:02 | 0.076408517         | 0,062066381 |
| 00:01:53 | 0.08099977999999999 | 0,058195894 | 00:02:02 | 0.07630614199999999 | 0,062149765 |
| 00:01:53 | 0.080891623         | 0,058286544 | 00:02:02 | 0.076203294         | 0,062229396 |
| 00:01:53 | 0.080779118         | 0,058378058 | 00:02:02 | 0.076100876         | 0,062308294 |
| 00:01:53 | 0.080668693         | 0,058470229 | 00:02:02 | 0.075996935         | 0,062388654 |
| 00:01:53 | 0.080556973         | 0,058561151 | 00:02:03 | 0.07589369          | 0,062468297 |
| 00:01:54 | 0.080452078         | 0,05865336  | 00:02:03 | 0.075806133         | 0,06254801  |
| 00:01:54 | 0.080345124         | 0,05874368  | 00:02:03 | 0.075704464         | 0,062628978 |
| 00:01:54 | 0.08023857399999999 | 0,058832763 | 00:02:03 | 0.07560573499999999 | 0,062707551 |
| 00:01:54 | 0.080132126         | 0,058921853 | 00:02:03 | 0.075504524         | 0,062788534 |
| 00:01:54 | 0.08002685800000001 | 0,059011821 | 00:02:04 | 0.07540403399999999 | 0,062866176 |
| 00:01:55 | 0.079919409         | 0,059101796 | 00:02:04 | 0.07530656500000001 | 0,062944918 |
| 00:01:55 | 0.079812017         | 0,059189918 | 00:02:04 | 0.075208234         | 0,063023011 |
| 00:01:55 | 0.07970274099999999 | 0,059279536 | 00:02:04 | 0.075108282         | 0,06310177  |
| 00:01:55 | 0.079609397         | 0,059363749 | 00:02:04 | 0.07501032000000001 | 0,063182989 |
| 00:01:55 | 0.07950470799999999 | 0,059453031 | 00:02:05 | 0.074909885         | 0,063262385 |
| 00:01:56 | 0.079399845         | 0,059539807 | 00:02:05 | 0.074812964         | 0,063343145 |
| 00:01:56 | 0.079295196         | 0,059627389 | 00:02:05 | 0.074715403         | 0,063419623 |
| 00:01:56 | 0.07918873          | 0,059714858 | 00:02:05 | 0.074631879         | 0,063494462 |
| 00:01:56 | 0.07908707600000001 | 0,059804472 | 00:02:05 | 0.074550809         | 0,063569167 |
| 00:01:56 | 0.078982974         | 0,059890488 | 00:02:06 | 0.07445513300000001 | 0,063647502 |
| 00:01:57 | 0.07887585499999999 | 0,059976351 | 00:02:06 | 0.07435882100000001 | 0,063722964 |
| 00:01:57 | 0.07877179500000001 | 0,060063457 | 00:02:06 | 0.07426103000000001 | 0,063802444 |
| 00:01:57 | 0.078671726         | 0,060150086 | 00:02:06 | 0.07416392600000001 | 0,063879713 |
| 00:01:57 | 0.07856998599999999 | 0,060236997 | 00:02:06 | 0.074070255         | 0,063958886 |
| 00:01:57 | 0.078466651         | 0,060321754 | 00:02:07 | 0.07397369099999999 | 0,06403642  |
| 00:01:58 | 0.078366748         | 0,060406028 | 00:02:07 | 0.073875713         | 0,064114611 |
| 00:01:58 | 0.078277738         | 0,060485742 | 00:02:07 | 0.073779542         | 0,064193806 |
| 00:01:58 | 0.078177731         | 0,060572767 | 00:02:07 | 0.073684349         | 0,064267261 |
| 00:01:58 | 0.078079358         | 0,060655521 | 00:02:07 | 0.073587657         | 0,064342718 |
| 00:01:58 | 0.077981142         | 0,060740288 | 00:02:07 | 0.073492553         | 0,064416947 |
| 00:01:59 | 0.07793710700000001 | 0,060830363 | 00:02:08 | 0.07339559599999999 | 0,064493624 |
| 00:01:59 | 0.077830682         | 0,0609176   | 00:02:08 | 0.073300297         | 0,064571214 |
| 00:01:59 | 0.07767808599999999 | 0,060997635 | 00:02:08 | 0.07320618199999999 | 0,064647247 |
| 00:01:59 | 0.07757898000000001 | 0,061082486 | 00:02:08 | 0.07311388100000001 | 0,06472168  |
| 00:01:59 | 0.07748155399999999 | 0,061167032 | 00:02:08 | 0.07302434100000001 | 0,064797553 |
| 00:02:00 | 0.077381229         | 0,061251883 | 00:02:09 | 0.07293160999999999 | 0,064871661 |
| 00:02:00 | 0.07728106899999999 | 0,061336171 | 00:02:09 | 0.07283616900000001 | 0,064944427 |

|          |                     |             |          |                     |             |
|----------|---------------------|-------------|----------|---------------------|-------------|
| 00:02:09 | 0.072755579         | 0,065014333 | 00:02:18 | 0.068595272         | 0,068245846 |
| 00:02:09 | 0.072664718         | 0,065086657 | 00:02:18 | 0.06851889999999999 | 0,068313005 |
| 00:02:09 | 0.072572495         | 0,065162175 | 00:02:19 | 0.06844528800000001 | 0,068379643 |
| 00:02:10 | 0.072481801         | 0,065235066 | 00:02:19 | 0.06836876          | 0,068447147 |
| 00:02:10 | 0.07239218          | 0,065309268 | 00:02:19 | 0.068294196         | 0,068515262 |
| 00:02:10 | 0.0723              | 0,065382278 | 00:02:19 | 0.068218946         | 0,068583055 |
| 00:02:10 | 0.07220984900000001 | 0,065453953 | 00:02:19 | 0.068145762         | 0,068650334 |
| 00:02:10 | 0.072119296         | 0,06552549  | 00:02:20 | 0.068072167         | 0,068716308 |
| 00:02:11 | 0.07203025          | 0,065598017 | 00:02:20 | 0.068011382         | 0,068782727 |
| 00:02:11 | 0.07194028199999999 | 0,065671135 | 00:02:20 | 0.067937319         | 0,068850657 |
| 00:02:11 | 0.071862781         | 0,065739989 | 00:02:20 | 0.067863746         | 0,068919669 |
| 00:02:11 | 0.071770577         | 0,065812391 | 00:02:20 | 0.067791502         | 0,068988016 |
| 00:02:11 | 0.07169151999999999 | 0,065881472 | 00:02:21 | 0.067720139         | 0,069055812 |
| 00:02:12 | 0.071601049         | 0,065952579 | 00:02:21 | 0.067650507         | 0,069120899 |
| 00:02:12 | 0.071512753         | 0,066026337 | 00:02:21 | 0.067578311         | 0,069189222 |
| 00:02:12 | 0.071423691         | 0,066097094 | 00:02:21 | 0.06750779          | 0,069254563 |
| 00:02:12 | 0.071334458         | 0,066170687 | 00:02:21 | 0.06747239200000001 | 0,069326067 |
| 00:02:12 | 0.071246979         | 0,066240654 | 00:02:22 | 0.067373821         | 0,069389855 |
| 00:02:13 | 0.071158997         | 0,066314872 | 00:02:22 | 0.06729146499999999 | 0,069456658 |
| 00:02:13 | 0.07108056          | 0,066385483 | 00:02:22 | 0.067221081         | 0,06952379  |
| 00:02:13 | 0.07100550899999999 | 0,066452745 | 00:02:22 | 0.067149816         | 0,0695893   |
| 00:02:13 | 0.070919104         | 0,066525725 | 00:02:22 | 0.067077832         | 0,069656194 |
| 00:02:13 | 0.070829024         | 0,066595772 | 00:02:23 | 0.067007554         | 0,069723488 |
| 00:02:14 | 0.070742931         | 0,066666199 | 00:02:23 | 0.06693658500000001 | 0,069791543 |
| 00:02:14 | 0.070419069         | 0,06671544  | 00:02:23 | 0.066864411         | 0,069855213 |
| 00:02:14 | 0.070199211         | 0,066771961 | 00:02:23 | 0.066796086         | 0,069920283 |
| 00:02:14 | 0.07012149400000001 | 0,066842491 | 00:02:23 | 0.066725769         | 0,06998414  |
| 00:02:14 | 0.07004136800000001 | 0,066912596 | 00:02:23 | 0.06665579100000001 | 0,070052038 |
| 00:02:15 | 0.069961705         | 0,066985253 | 00:02:24 | 0.066586531         | 0,070117574 |
| 00:02:15 | 0.06988213          | 0,067056016 | 00:02:24 | 0.066518304         | 0,070182455 |
| 00:02:15 | 0.06979988500000001 | 0,067130515 | 00:02:24 | 0.066461962         | 0,070244459 |
| 00:02:15 | 0.069722224         | 0,067201493 | 00:02:24 | 0.06640299500000001 | 0,070307451 |
| 00:02:15 | 0.069645396         | 0,067272672 | 00:02:25 | 0.06633402200000001 | 0,070372191 |
| 00:02:16 | 0.069571676         | 0,067345051 | 00:02:25 | 0.066266546         | 0,070436626 |
| 00:02:16 | 0.06949641099999999 | 0,067417012 | 00:02:25 | 0.06619668500000001 | 0,070501486 |
| 00:02:16 | 0.069419624         | 0,067485481 | 00:02:25 | 0.066130666         | 0,070565798 |
| 00:02:16 | 0.069338725         | 0,06755279  | 00:02:25 | 0.066061589         | 0,070631011 |
| 00:02:16 | 0.069260532         | 0,067625001 | 00:02:25 | 0.065985356         | 0,070694774 |
| 00:02:17 | 0.069184869         | 0,067697923 | 00:02:26 | 0.06591224699999999 | 0,070757274 |
| 00:02:17 | 0.069107933         | 0,067768114 | 00:02:26 | 0.06584907399999999 | 0,070815763 |
| 00:02:17 | 0.06904389900000001 | 0,067834148 | 00:02:26 | 0.065777525         | 0,070877852 |
| 00:02:17 | 0.06896501100000001 | 0,067904606 | 00:02:26 | 0.065702443         | 0,070939752 |
| 00:02:17 | 0.068889767         | 0,067974958 | 00:02:26 | 0.065629091         | 0,071003479 |
| 00:02:18 | 0.06881659          | 0,068043678 | 00:02:27 | 0.065554213         | 0,071067411 |
| 00:02:18 | 0.06874112          | 0,068111863 | 00:02:27 | 0.065482734         | 0,071131029 |
| 00:02:18 | 0.068674821         | 0,068177083 | 00:02:27 | 0.06540844799999999 | 0,071192262 |

|          |                     |             |          |             |             |
|----------|---------------------|-------------|----------|-------------|-------------|
| 00:02:27 | 0.065335592         | 0,071253993 | 00:02:36 | 0.062280064 | 0,073989244 |
| 00:02:27 | 0.065262683         | 0,071314761 | 00:02:37 | 0.062217468 | 0,074046222 |
| 00:02:28 | 0.065190531         | 0,07137534  | 00:02:37 | 0.062160164 | 0,074103458 |
| 00:02:28 | 0.06511961600000001 | 0,071437317 | 00:02:37 | 0.06210158  | 0,074160404 |
| 00:02:28 | 0.065048961         | 0,071498842 | 00:02:37 | 0.062042719 | 0,074215907 |
| 00:02:28 | 0.06497589600000001 | 0,071558244 | 00:02:37 | 0.061991741 | 0,074269499 |
| 00:02:28 | 0.064903767         | 0,07161777  | 00:02:38 | 0.06193518  | 0,074325542 |
| 00:02:29 | 0.064832774         | 0,071680432 | 00:02:38 | 0.0618752   | 0,074384719 |
| 00:02:29 | 0.06476564899999999 | 0,071742818 | 00:02:38 | 0.061818671 | 0,074442411 |
| 00:02:29 | 0.064695505         | 0,07180323  | 00:02:38 | 0.06176017  | 0,074498306 |
| 00:02:29 | 0.06462564899999999 | 0,071862207 | 00:02:38 | 0.061699569 | 0,074553725 |
| 00:02:29 | 0.06455462300000001 | 0,071922963 | 00:02:39 | 0.061640335 | 0,074610182 |
| 00:02:30 | 0.064481513         | 0,07198567  | 00:02:39 | 0.061582571 | 0,074665513 |
| 00:02:30 | 0.06444042          | 0,072048174 | 00:02:39 | 0.061527078 | 0,074722111 |
| 00:02:30 | 0.06437899900000001 | 0,072110185 | 00:02:39 | 0.06146693  | 0,074776802 |
| 00:02:30 | 0.06427190300000001 | 0,072164978 | 00:02:39 | 0.061409464 | 0,074832783 |
| 00:02:30 | 0.064201806         | 0,072225475 | 00:02:40 | 0.061352027 | 0,074888187 |
| 00:02:31 | 0.064184885         | 0,072290291 | 00:02:40 | 0.061293241 | 0,074944215 |
| 00:02:31 | 0.064094541         | 0,072350572 | 00:02:40 | 0.061236464 | 0,075000156 |
| 00:02:31 | 0.063989087         | 0,072409027 | 00:02:40 | 0.061177473 | 0,075055616 |
| 00:02:31 | 0.063919848         | 0,072468681 | 00:02:40 | 0.061120385 | 0,075111772 |
| 00:02:31 | 0.063851386         | 0,072530427 | 00:02:41 | 0.061062037 | 0,075167544 |
| 00:02:32 | 0.063781542         | 0,072590111 | 00:02:41 | 0.06100883  | 0,075224422 |
| 00:02:32 | 0.063712111         | 0,072648896 | 00:02:41 | 0.061121089 | 0,075294986 |
| 00:02:32 | 0.063644144         | 0,072708463 | 00:02:41 | 0.060973263 | 0,075341157 |
| 00:02:32 | 0.06357436800000001 | 0,072766992 | 00:02:41 | 0.061053202 | 0,075408957 |
| 00:02:32 | 0.063503737         | 0,072826069 | 00:02:41 | 0.060982493 | 0,075463515 |
| 00:02:33 | 0.063447815         | 0,072881271 | 00:02:42 | 0.060914    | 0,075516786 |
| 00:02:33 | 0.063383856         | 0,072940049 | 00:02:42 | 0.060662216 | 0,075554536 |
| 00:02:33 | 0.063322008         | 0,07299849  | 00:02:42 | 0.060684683 | 0,075616362 |
| 00:02:33 | 0.063259814         | 0,073057278 | 00:02:42 | 0.060549604 | 0,075664284 |
| 00:02:33 | 0.063196346         | 0,073116878 | 00:02:42 | 0.060632945 | 0,07573356  |
| 00:02:34 | 0.06313506300000001 | 0,073175542 | 00:02:43 | 0.060564005 | 0,075786554 |
| 00:02:34 | 0.063217939         | 0,073248424 | 00:02:43 | 0.060497776 | 0,075838876 |
| 00:02:34 | 0.06315915699999999 | 0,073307745 | 00:02:43 | 0.060429884 | 0,075891864 |
| 00:02:34 | 0.063098926         | 0,073367616 | 00:02:43 | 0.060378476 | 0,075941986 |
| 00:02:34 | 0.062888061         | 0,073411971 | 00:02:43 | 0.060301152 | 0,075993645 |
| 00:02:35 | 0.062825556         | 0,073470746 | 00:02:44 | 0.060198834 | 0,076042048 |
| 00:02:35 | 0.062764161         | 0,073530247 | 00:02:44 | 0.060169738 | 0,076096506 |
| 00:02:35 | 0.06270292600000001 | 0,073589407 | 00:02:44 | 0.060102533 | 0,076148651 |
| 00:02:35 | 0.062640891         | 0,073644993 | 00:02:44 | 0.060035115 | 0,076200217 |
| 00:02:35 | 0.06258052          | 0,073702048 | 00:02:44 | 0.059967473 | 0,076252468 |
| 00:02:36 | 0.062522836         | 0,073758475 | 00:02:45 | 0.059897954 | 0,076304718 |
| 00:02:36 | 0.062466067         | 0,07381757  | 00:02:45 | 0.059839026 | 0,076356864 |
| 00:02:36 | 0.062406254         | 0,073874609 | 00:02:45 | 0.059784373 | 0,076410737 |
| 00:02:36 | 0.062342034         | 0,073932431 | 00:02:45 | 0.05972788  | 0,076463613 |

|          |             |             |          |             |             |
|----------|-------------|-------------|----------|-------------|-------------|
| 00:02:46 | 0.059676079 | 0,076516323 | 00:02:55 | 0.057304763 | 0,07884958  |
| 00:02:46 | 0.059621404 | 0,076567644 | 00:02:55 | 0.057252867 | 0,078897673 |
| 00:02:46 | 0.05956839  | 0,076619625 | 00:02:55 | 0.057206425 | 0,07894549  |
| 00:02:46 | 0.059512381 | 0,076673712 | 00:02:55 | 0.057156089 | 0,078993755 |
| 00:02:46 | 0.059476271 | 0,076727267 | 00:02:55 | 0.057107723 | 0,079041567 |
| 00:02:46 | 0.059405942 | 0,076778494 | 00:02:56 | 0.057059965 | 0,07909047  |
| 00:02:47 | 0.059351349 | 0,076830064 | 00:02:56 | 0.057012788 | 0,07914035  |
| 00:02:47 | 0.059298241 | 0,076883179 | 00:02:56 | 0.056964884 | 0,07918776  |
| 00:02:47 | 0.059242972 | 0,076935376 | 00:02:56 | 0.056917727 | 0,079235766 |
| 00:02:47 | 0.059190041 | 0,076985895 | 00:02:56 | 0.056870006 | 0,079283259 |
| 00:02:47 | 0.059138185 | 0,077036768 | 00:02:57 | 0.056958622 | 0,079343459 |
| 00:02:48 | 0.059086496 | 0,077088999 | 00:02:57 | 0.056774973 | 0,079379554 |
| 00:02:48 | 0.059033391 | 0,077140956 | 00:02:57 | 0.056727094 | 0,079427616 |
| 00:02:48 | 0.058979953 | 0,077192252 | 00:02:57 | 0.056678353 | 0,079475053 |
| 00:02:48 | 0.058928172 | 0,077243485 | 00:02:57 | 0.05663178  | 0,079523477 |
| 00:02:48 | 0.058873948 | 0,077295776 | 00:02:58 | 0.05658367  | 0,079571282 |
| 00:02:49 | 0.058821657 | 0,077347178 | 00:02:58 | 0.056536441 | 0,079618792 |
| 00:02:49 | 0.058767482 | 0,077399323 | 00:02:58 | 0.056489783 | 0,079666408 |
| 00:02:49 | 0.058715602 | 0,07745012  | 00:02:58 | 0.056443513 | 0,079715392 |
| 00:02:49 | 0.058663252 | 0,077500902 | 00:02:58 | 0.056397429 | 0,079763915 |
| 00:02:49 | 0.058609657 | 0,077551715 | 00:02:59 | 0.056350173 | 0,079811058 |
| 00:02:50 | 0.058557707 | 0,077601711 | 00:02:59 | 0.056303345 | 0,07985747  |
| 00:02:50 | 0.058511629 | 0,077656229 | 00:02:59 | 0.056257058 | 0,079904075 |
| 00:02:50 | 0.058505403 | 0,077707575 | 00:02:59 | 0.056209851 | 0,079951658 |
| 00:02:50 | 0.05841026  | 0,077755253 | 00:02:59 | 0.056165828 | 0,079997704 |
| 00:02:50 | 0.058352485 | 0,077804405 | 00:03:00 | 0.056120186 | 0,080045802 |
| 00:02:51 | 0.058307735 | 0,077853333 | 00:03:00 | 0.056155927 | 0,080097387 |
| 00:02:51 | 0.058302018 | 0,077907709 | 00:03:00 | 0.056027794 | 0,080137066 |
| 00:02:51 | 0.058206515 | 0,077953927 | 00:03:00 | 0.055981446 | 0,080183641 |
| 00:02:51 | 0.058381748 | 0,07802453  | 00:03:00 | 0.055937181 | 0,080229634 |
| 00:02:51 | 0.058330148 | 0,078075194 | 00:03:01 | 0.055891939 | 0,080276403 |
| 00:02:52 | 0.058223384 | 0,078121049 | 00:03:01 | 0.055845017 | 0,080322803 |
| 00:02:52 | 0.058001736 | 0,078156792 | 00:03:01 | 0.055800151 | 0,080369171 |
| 00:02:52 | 0.057950384 | 0,07820626  | 00:03:01 | 0.055813326 | 0,080420806 |
| 00:02:52 | 0.057900224 | 0,078256269 | 00:03:01 | 0.055771322 | 0,080467007 |
| 00:02:52 | 0.057848901 | 0,078306482 | 00:03:01 | 0.055680526 | 0,080510677 |
| 00:02:53 | 0.057799206 | 0,078359096 | 00:03:02 | 0.055672705 | 0,080559888 |
| 00:02:53 | 0.057749426 | 0,078408216 | 00:03:02 | 0.055625509 | 0,080604964 |
| 00:02:53 | 0.057699709 | 0,0784575   | 00:03:02 | 0.055575925 | 0,080651449 |
| 00:02:53 | 0.057649287 | 0,078508386 | 00:03:02 | 0.055486339 | 0,080692637 |
| 00:02:53 | 0.057598837 | 0,078556801 | 00:03:02 | 0.055438765 | 0,080738856 |
| 00:02:54 | 0.057549723 | 0,078605263 | 00:03:03 | 0.055393962 | 0,080783826 |
| 00:02:54 | 0.057500691 | 0,078653628 | 00:03:03 | 0.055349872 | 0,080829268 |
| 00:02:54 | 0.057450435 | 0,07870294  | 00:03:03 | 0.055306887 | 0,080875638 |
| 00:02:54 | 0.05740288  | 0,078752245 | 00:03:03 | 0.055284716 | 0,080922854 |
| 00:02:54 | 0.057353344 | 0,078800284 | 00:03:03 | 0.055236584 | 0,08096791  |

|          |             |             |          |             |             |
|----------|-------------|-------------|----------|-------------|-------------|
| 00:03:04 | 0.055172095 | 0,081012781 | 00:03:13 | 0.053213381 | 0,083018113 |
| 00:03:04 | 0.055128106 | 0,081058318 | 00:03:13 | 0.053169877 | 0,083060329 |
| 00:03:04 | 0.055089644 | 0,081103211 | 00:03:13 | 0.053126585 | 0,083101168 |
| 00:03:04 | 0.055044697 | 0,081147181 | 00:03:13 | 0.053085391 | 0,083142973 |
| 00:03:04 | 0.054999054 | 0,081193034 | 00:03:14 | 0.053041998 | 0,083184502 |
| 00:03:05 | 0.054954702 | 0,0812381   | 00:03:14 | 0.052998635 | 0,083225089 |
| 00:03:05 | 0.054908114 | 0,081281617 | 00:03:14 | 0.052954553 | 0,083266816 |
| 00:03:05 | 0.054866218 | 0,081326283 | 00:03:14 | 0.052912018 | 0,083308512 |
| 00:03:05 | 0.054820517 | 0,081370813 | 00:03:14 | 0.052872277 | 0,083350212 |
| 00:03:05 | 0.054776898 | 0,081416953 | 00:03:15 | 0.052837218 | 0,08339155  |
| 00:03:06 | 0.054730861 | 0,08146304  | 00:03:15 | 0.052795091 | 0,083432    |
| 00:03:06 | 0.054692904 | 0,081506365 | 00:03:15 | 0.052753148 | 0,083472614 |
| 00:03:06 | 0.054649272 | 0,081550558 | 00:03:15 | 0.052710622 | 0,083514502 |
| 00:03:06 | 0.054605353 | 0,081595773 | 00:03:15 | 0.052668145 | 0,083555776 |
| 00:03:06 | 0.054563399 | 0,081639692 | 00:03:16 | 0.052627133 | 0,083597123 |
| 00:03:07 | 0.054519975 | 0,081684189 | 00:03:16 | 0.052584168 | 0,083637533 |
| 00:03:07 | 0.054475832 | 0,081728288 | 00:03:16 | 0.052542668 | 0,083677411 |
| 00:03:07 | 0.054434336 | 0,081771344 | 00:03:16 | 0.0525013   | 0,083718185 |
| 00:03:07 | 0.054390687 | 0,081816117 | 00:03:16 | 0.052458836 | 0,083758754 |
| 00:03:07 | 0.054349268 | 0,081858538 | 00:03:16 | 0.052417954 | 0,083798989 |
| 00:03:08 | 0.054304585 | 0,081903572 | 00:03:17 | 0.052377273 | 0,083840722 |
| 00:03:08 | 0.054264285 | 0,081947865 | 00:03:17 | 0.052336344 | 0,083880365 |
| 00:03:08 | 0.054222626 | 0,081990915 | 00:03:17 | 0.052294842 | 0,083920848 |
| 00:03:08 | 0.05417797  | 0,082035231 | 00:03:17 | 0.052253979 | 0,083960773 |
| 00:03:08 | 0.054137682 | 0,082077188 | 00:03:18 | 0.052210921 | 0,084002438 |
| 00:03:09 | 0.054100658 | 0,082119181 | 00:03:18 | 0.052171035 | 0,084043409 |
| 00:03:09 | 0.054060121 | 0,082162739 | 00:03:18 | 0.052129587 | 0,084083446 |
| 00:03:09 | 0.054016612 | 0,082206585 | 00:03:18 | 0.052088299 | 0,084125572 |
| 00:03:09 | 0.05397189  | 0,082251536 | 00:03:18 | 0.052048196 | 0,084166707 |
| 00:03:09 | 0.053931527 | 0,082294327 | 00:03:19 | 0.0520069   | 0,084205538 |
| 00:03:10 | 0.053892426 | 0,08233739  | 00:03:19 | 0.051967401 | 0,084245584 |
| 00:03:10 | 0.053852551 | 0,08238013  | 00:03:19 | 0.051927772 | 0,084287462 |
| 00:03:10 | 0.053809621 | 0,082423697 | 00:03:19 | 0.051897346 | 0,08432832  |
| 00:03:10 | 0.053767943 | 0,082467041 | 00:03:19 | 0.051858395 | 0,08436831  |
| 00:03:10 | 0.053724854 | 0,082510525 | 00:03:19 | 0.0518183   | 0,084407569 |
| 00:03:11 | 0.053683764 | 0,082553084 | 00:03:20 | 0.051778656 | 0,08444615  |
| 00:03:11 | 0.053643219 | 0,082595211 | 00:03:20 | 0.051738259 | 0,084484553 |
| 00:03:11 | 0.053599718 | 0,082638229 | 00:03:20 | 0.05170065  | 0,08452293  |
| 00:03:11 | 0.053555945 | 0,082681225 | 00:03:20 | 0.051660748 | 0,0845634   |
| 00:03:11 | 0.053512008 | 0,082722537 | 00:03:21 | 0.051621595 | 0,084603034 |
| 00:03:12 | 0.053468298 | 0,082764072 | 00:03:21 | 0.051582484 | 0,084642519 |
| 00:03:12 | 0.053425027 | 0,082806616 | 00:03:21 | 0.05154384  | 0,08468123  |
| 00:03:12 | 0.053382071 | 0,082848817 | 00:03:21 | 0.051504208 | 0,084720483 |
| 00:03:12 | 0.053340907 | 0,082890923 | 00:03:21 | 0.051464019 | 0,084760329 |
| 00:03:12 | 0.053299409 | 0,082933876 | 00:03:21 | 0.051425211 | 0,084798575 |
| 00:03:13 | 0.053256646 | 0,082977022 | 00:03:22 | 0.051384744 | 0,084837117 |

|          |             |             |          |             |             |
|----------|-------------|-------------|----------|-------------|-------------|
| 00:03:22 | 0.051345116 | 0,084877347 | 00:03:31 | 0.049683661 | 0,086625046 |
| 00:03:22 | 0.051306889 | 0,084915852 | 00:03:31 | 0.049647031 | 0,086661782 |
| 00:03:22 | 0.051267434 | 0,084954959 | 00:03:31 | 0.049608755 | 0,086698515 |
| 00:03:22 | 0.051228568 | 0,084994259 | 00:03:32 | 0.049572449 | 0,086735533 |
| 00:03:23 | 0.051191118 | 0,085033742 | 00:03:32 | 0.049535197 | 0,086771609 |
| 00:03:23 | 0.051151161 | 0,085070356 | 00:03:32 | 0.049499016 | 0,086808849 |
| 00:03:23 | 0.051112488 | 0,085110099 | 00:03:32 | 0.049462049 | 0,086845003 |
| 00:03:23 | 0.051072183 | 0,085148863 | 00:03:32 | 0.049424602 | 0,086880017 |
| 00:03:23 | 0.051033002 | 0,085187902 | 00:03:33 | 0.04938824  | 0,086916248 |
| 00:03:24 | 0.050995896 | 0,08522695  | 00:03:33 | 0.049351991 | 0,086952797 |
| 00:03:24 | 0.05095494  | 0,085266424 | 00:03:33 | 0.049314921 | 0,086989377 |
| 00:03:24 | 0.050915786 | 0,085304744 | 00:03:33 | 0.049280197 | 0,087024419 |
| 00:03:24 | 0.050876793 | 0,08534308  | 00:03:33 | 0.049243333 | 0,087060803 |
| 00:03:24 | 0.050837836 | 0,085382731 | 00:03:34 | 0.049208994 | 0,087097001 |
| 00:03:25 | 0.050800393 | 0,085420488 | 00:03:34 | 0.04917345  | 0,08713348  |
| 00:03:25 | 0.050762564 | 0,085458896 | 00:03:34 | 0.049135727 | 0,087168691 |
| 00:03:25 | 0.050723733 | 0,085496672 | 00:03:34 | 0.049099732 | 0,08720366  |
| 00:03:25 | 0.050685552 | 0,085535691 | 00:03:34 | 0.049063619 | 0,087239387 |
| 00:03:25 | 0.050647217 | 0,085573265 | 00:03:35 | 0.049028934 | 0,087273505 |
| 00:03:26 | 0.050609291 | 0,085611595 | 00:03:35 | 0.04899131  | 0,087309795 |
| 00:03:26 | 0.050571533 | 0,085650039 | 00:03:35 | 0.048957652 | 0,087345663 |
| 00:03:26 | 0.050532661 | 0,085686484 | 00:03:35 | 0.048923316 | 0,087383235 |
| 00:03:26 | 0.050494436 | 0,08572443  | 00:03:35 | 0.048888572 | 0,087418378 |
| 00:03:26 | 0.050456004 | 0,08576228  | 00:03:36 | 0.048852298 | 0,087454041 |
| 00:03:27 | 0.050428717 | 0,085801937 | 00:03:36 | 0.048817614 | 0,087490121 |
| 00:03:27 | 0.050397506 | 0,085839633 | 00:03:36 | 0.048782973 | 0,087523661 |
| 00:03:27 | 0.050366758 | 0,085877506 | 00:03:36 | 0.048747802 | 0,08755795  |
| 00:03:27 | 0.050386407 | 0,085920361 | 00:03:36 | 0.048712925 | 0,087594558 |
| 00:03:27 | 0.050349357 | 0,085958063 | 00:03:36 | 0.048678625 | 0,087630821 |
| 00:03:28 | 0.050312978 | 0,08599511  | 00:03:37 | 0.048646161 | 0,087666223 |
| 00:03:28 | 0.050276801 | 0,086033639 | 00:03:37 | 0.048610245 | 0,087702092 |
| 00:03:28 | 0.050241068 | 0,086070908 | 00:03:37 | 0.04857628  | 0,087737993 |
| 00:03:28 | 0.050202865 | 0,086107037 | 00:03:37 | 0.048540427 | 0,087772336 |
| 00:03:28 | 0.050168531 | 0,086143123 | 00:03:37 | 0.048504029 | 0,087807619 |
| 00:03:29 | 0.050129314 | 0,086181104 | 00:03:38 | 0.048470218 | 0,087842747 |
| 00:03:29 | 0.050091729 | 0,086218415 | 00:03:38 | 0.048435215 | 0,08787729  |
| 00:03:29 | 0.050056247 | 0,086256192 | 00:03:38 | 0.04839986  | 0,087912749 |
| 00:03:29 | 0.050018232 | 0,086294281 | 00:03:38 | 0.048366495 | 0,087947328 |
| 00:03:29 | 0.049979055 | 0,086331009 | 00:03:38 | 0.048332461 | 0,087983171 |
| 00:03:30 | 0.04994154  | 0,086367866 | 00:03:39 | 0.048298838 | 0,088017189 |
| 00:03:30 | 0.049904484 | 0,086404223 | 00:03:39 | 0.048264646 | 0,088052981 |
| 00:03:30 | 0.049867788 | 0,086440979 | 00:03:39 | 0.048230992 | 0,088088593 |
| 00:03:30 | 0.049831625 | 0,086477792 | 00:03:39 | 0.048196564 | 0,088123567 |
| 00:03:30 | 0.049794457 | 0,086513444 | 00:03:39 | 0.048162381 | 0,088157997 |
| 00:03:31 | 0.049758642 | 0,086550108 | 00:03:40 | 0.048130418 | 0,088193282 |
| 00:03:31 | 0.049721051 | 0,086588276 | 00:03:40 | 0.048095278 | 0,088227667 |

|          |             |             |          |             |             |
|----------|-------------|-------------|----------|-------------|-------------|
| 00:03:40 | 0.048062252 | 0,088261111 | 00:03:49 | 0.046547906 | 0,089789974 |
| 00:03:40 | 0.048027527 | 0,088295373 | 00:03:49 | 0.046515815 | 0,089821534 |
| 00:03:40 | 0.047994124 | 0,088329398 | 00:03:50 | 0.046484808 | 0,089854309 |
| 00:03:41 | 0.047959814 | 0,088363311 | 00:03:50 | 0.046460006 | 0,089887091 |
| 00:03:41 | 0.04792536  | 0,088396848 | 00:03:50 | 0.046430722 | 0,089918218 |
| 00:03:41 | 0.047891882 | 0,088431247 | 00:03:50 | 0.046400256 | 0,089949955 |
| 00:03:41 | 0.047857833 | 0,088465828 | 00:03:50 | 0.046369392 | 0,089981561 |
| 00:03:41 | 0.047822173 | 0,088499402 | 00:03:51 | 0.046337801 | 0,09001295  |
| 00:03:42 | 0.047793902 | 0,088533923 | 00:03:51 | 0.046305992 | 0,0900449   |
| 00:03:42 | 0.047759953 | 0,08856719  | 00:03:51 | 0.046273579 | 0,090076144 |
| 00:03:42 | 0.047725297 | 0,088601897 | 00:03:51 | 0.046244277 | 0,090107562 |
| 00:03:42 | 0.047692255 | 0,0886362   | 00:03:51 | 0.04621434  | 0,090139488 |
| 00:03:42 | 0.047660589 | 0,088670657 | 00:03:51 | 0.04618231  | 0,090171416 |
| 00:03:43 | 0.047627708 | 0,088704354 | 00:03:52 | 0.046149565 | 0,09020236  |
| 00:03:43 | 0.047594488 | 0,088737883 | 00:03:52 | 0.046119677 | 0,090234106 |
| 00:03:43 | 0.047559606 | 0,088770155 | 00:03:52 | 0.046088896 | 0,090264763 |
| 00:03:43 | 0.04752906  | 0,088804841 | 00:03:52 | 0.046059791 | 0,090295189 |
| 00:03:43 | 0.047495934 | 0,088838922 | 00:03:53 | 0.046028585 | 0,09032667  |
| 00:03:44 | 0.047465206 | 0,0888729   | 00:03:53 | 0.045997452 | 0,090357424 |
| 00:03:44 | 0.0474323   | 0,088907418 | 00:03:53 | 0.045970064 | 0,090389663 |
| 00:03:44 | 0.047401216 | 0,08894068  | 00:03:53 | 0.045938677 | 0,090419903 |
| 00:03:44 | 0.047369892 | 0,08897399  | 00:03:53 | 0.045908775 | 0,09045058  |
| 00:03:44 | 0.047335375 | 0,089007389 | 00:03:54 | 0.045879461 | 0,090482451 |
| 00:03:45 | 0.047301659 | 0,089040687 | 00:03:54 | 0.045849823 | 0,090512642 |
| 00:03:45 | 0.047267441 | 0,089073012 | 00:03:54 | 0.045818109 | 0,090543235 |
| 00:03:45 | 0.047234068 | 0,089105779 | 00:03:54 | 0.045789853 | 0,09057498  |
| 00:03:45 | 0.047202254 | 0,089138314 | 00:03:54 | 0.045759731 | 0,090606518 |
| 00:03:45 | 0.047171011 | 0,089170529 | 00:03:55 | 0.045729971 | 0,090637285 |
| 00:03:46 | 0.047138968 | 0,08920332  | 00:03:55 | 0.045695674 | 0,090667281 |
| 00:03:46 | 0.047105049 | 0,089237233 | 00:03:55 | 0.04567117  | 0,090698935 |
| 00:03:46 | 0.047072203 | 0,089270823 | 00:03:55 | 0.045641864 | 0,090729458 |
| 00:03:46 | 0.047038874 | 0,089304219 | 00:03:55 | 0.045613299 | 0,090761093 |
| 00:03:46 | 0.047007071 | 0,089338226 | 00:03:56 | 0.045575235 | 0,090790474 |
| 00:03:47 | 0.046973697 | 0,089369927 | 00:03:56 | 0.045546091 | 0,090821221 |
| 00:03:47 | 0.046941875 | 0,089403459 | 00:03:56 | 0.045516724 | 0,090851608 |
| 00:03:47 | 0.04691048  | 0,08943713  | 00:03:56 | 0.045487938 | 0,090880495 |
| 00:03:47 | 0.046879412 | 0,089470792 | 00:03:56 | 0.045465916 | 0,090913103 |
| 00:03:47 | 0.046847486 | 0,089503402 | 00:03:56 | 0.045436506 | 0,090943602 |
| 00:03:48 | 0.046814505 | 0,089536168 | 00:03:57 | 0.045408755 | 0,090975371 |
| 00:03:48 | 0.046778477 | 0,08956654  | 00:03:57 | 0.045370856 | 0,091004613 |
| 00:03:48 | 0.046738339 | 0,089597958 | 00:03:57 | 0.045341078 | 0,091035401 |
| 00:03:48 | 0.04670249  | 0,089630994 | 00:03:57 | 0.045312851 | 0,091065837 |
| 00:03:48 | 0.046672622 | 0,089660844 | 00:03:57 | 0.045285255 | 0,091096804 |
| 00:03:49 | 0.046651038 | 0,089693872 | 00:03:58 | 0.045256098 | 0,091126425 |
| 00:03:49 | 0.04661043  | 0,089725353 | 00:03:58 | 0.045226902 | 0,091156942 |
| 00:03:49 | 0.046578013 | 0,089758016 | 00:03:58 | 0.045198325 | 0,091187062 |

|          |             |             |          |             |             |
|----------|-------------|-------------|----------|-------------|-------------|
| 00:03:58 | 0.045168126 | 0,09121681  | 00:04:07 | 0.043864467 | 0,092576824 |
| 00:03:58 | 0.045151296 | 0,091248065 | 00:04:08 | 0.043837795 | 0,092605064 |
| 00:03:59 | 0.045122461 | 0,091279162 | 00:04:08 | 0.043809919 | 0,092631989 |
| 00:03:59 | 0.045094998 | 0,091308866 | 00:04:08 | 0.043782538 | 0,092659362 |
| 00:03:59 | 0.045067306 | 0,091339767 | 00:04:08 | 0.043755608 | 0,092687512 |
| 00:03:59 | 0.045038449 | 0,091369848 | 00:04:08 | 0.043729704 | 0,092715651 |
| 00:03:59 | 0.045010825 | 0,091399583 | 00:04:09 | 0.043702537 | 0,092744731 |
| 00:04:00 | 0.044982352 | 0,091429133 | 00:04:09 | 0.04367623  | 0,092772804 |
| 00:04:00 | 0.044953935 | 0,091460126 | 00:04:09 | 0.043649602 | 0,092801808 |
| 00:04:00 | 0.044925239 | 0,091490099 | 00:04:09 | 0.043622125 | 0,092832032 |
| 00:04:00 | 0.044890706 | 0,091519555 | 00:04:09 | 0.043595115 | 0,092860815 |
| 00:04:00 | 0.044852906 | 0,09154894  | 00:04:10 | 0.043568693 | 0,092888899 |
| 00:04:01 | 0.044819235 | 0,091576975 | 00:04:10 | 0.043543125 | 0,0929163   |
| 00:04:01 | 0.044790279 | 0,091608133 | 00:04:10 | 0.043517862 | 0,092945114 |
| 00:04:01 | 0.044760129 | 0,091638097 | 00:04:10 | 0.043490172 | 0,092973614 |
| 00:04:01 | 0.044732671 | 0,091670382 | 00:04:10 | 0.043463673 | 0,093001794 |
| 00:04:01 | 0.0447253   | 0,091702072 | 00:04:11 | 0.043436685 | 0,093030285 |
| 00:04:02 | 0.04467458  | 0,091729572 | 00:04:11 | 0.04340959  | 0,093059663 |
| 00:04:02 | 0.044645271 | 0,091758202 | 00:04:11 | 0.043382819 | 0,093088804 |
| 00:04:02 | 0.044615535 | 0,091787894 | 00:04:11 | 0.043356673 | 0,093116246 |
| 00:04:02 | 0.044587792 | 0,091818102 | 00:04:11 | 0.043329627 | 0,093143434 |
| 00:04:02 | 0.044559914 | 0,091848355 | 00:04:11 | 0.04330232  | 0,0931721   |
| 00:04:03 | 0.044531885 | 0,09187791  | 00:04:12 | 0.043277066 | 0,093199142 |
| 00:04:03 | 0.044504609 | 0,091906878 | 00:04:12 | 0.043249893 | 0,093227635 |
| 00:04:03 | 0.044476613 | 0,091936207 | 00:04:12 | 0.043223849 | 0,093255877 |
| 00:04:03 | 0.044448411 | 0,091966651 | 00:04:12 | 0.043198215 | 0,093282982 |
| 00:04:03 | 0.044418693 | 0,091995573 | 00:04:12 | 0.043172015 | 0,093310028 |
| 00:04:04 | 0.044390025 | 0,092025149 | 00:04:13 | 0.043150732 | 0,093339321 |
| 00:04:04 | 0.044391227 | 0,092056181 | 00:04:13 | 0.04312362  | 0,093366219 |
| 00:04:04 | 0.044335907 | 0,092082003 | 00:04:13 | 0.043099396 | 0,09339344  |
| 00:04:04 | 0.044308894 | 0,092112193 | 00:04:13 | 0.043072404 | 0,093420828 |
| 00:04:04 | 0.044280115 | 0,09214156  | 00:04:14 | 0.043047269 | 0,093448928 |
| 00:04:05 | 0.044251668 | 0,09217007  | 00:04:14 | 0.043019382 | 0,093477697 |
| 00:04:05 | 0.04422398  | 0,09219881  | 00:04:14 | 0.043054769 | 0,093511026 |
| 00:04:05 | 0.044196356 | 0,092227782 | 00:04:14 | 0.042967693 | 0,093532558 |
| 00:04:05 | 0.044168847 | 0,092256771 | 00:04:14 | 0.043005559 | 0,0935662   |
| 00:04:05 | 0.044141242 | 0,09228664  | 00:04:14 | 0.042979816 | 0,093593383 |
| 00:04:06 | 0.04411449  | 0,092315758 | 00:04:15 | 0.042959131 | 0,093621397 |
| 00:04:06 | 0.044086312 | 0,092343565 | 00:04:15 | 0.042933444 | 0,093648665 |
| 00:04:06 | 0.044059805 | 0,092373514 | 00:04:15 | 0.042907042 | 0,093676705 |
| 00:04:06 | 0.044031117 | 0,09240291  | 00:04:15 | 0.04288203  | 0,093703243 |
| 00:04:06 | 0.044002369 | 0,092433368 | 00:04:16 | 0.042857232 | 0,093729416 |
| 00:04:07 | 0.043975136 | 0,092462345 | 00:04:16 | 0.042832755 | 0,093756441 |
| 00:04:07 | 0.043946702 | 0,092491681 | 00:04:16 | 0.042808064 | 0,093784086 |
| 00:04:07 | 0.043918852 | 0,092520011 | 00:04:16 | 0.042783546 | 0,093811323 |
| 00:04:07 | 0.043892218 | 0,092548364 | 00:04:16 | 0.042758749 | 0,093838694 |

|          |             |             |          |             |             |
|----------|-------------|-------------|----------|-------------|-------------|
| 00:04:16 | 0.042733121 | 0,093865304 | 00:04:26 | 0.041622365 | 0,095089244 |
| 00:04:17 | 0.042708079 | 0,093892501 | 00:04:26 | 0.04159934  | 0,095115296 |
| 00:04:17 | 0.042683738 | 0,093919518 | 00:04:26 | 0.04157705  | 0,095140896 |
| 00:04:17 | 0.042658211 | 0,093947788 | 00:04:26 | 0.041552742 | 0,0951672   |
| 00:04:17 | 0.042634915 | 0,093975287 | 00:04:26 | 0.041529482 | 0,09519225  |
| 00:04:17 | 0.042610534 | 0,094001675 | 00:04:27 | 0.041505722 | 0,095218744 |
| 00:04:18 | 0.042585102 | 0,094027603 | 00:04:27 | 0.041481831 | 0,095243919 |
| 00:04:18 | 0.042560719 | 0,094053459 | 00:04:27 | 0.04145782  | 0,095269792 |
| 00:04:18 | 0.04253577  | 0,094080953 | 00:04:27 | 0.04143372  | 0,095295854 |
| 00:04:18 | 0.042510041 | 0,094107576 | 00:04:27 | 0.041411286 | 0,095322609 |
| 00:04:18 | 0.042488341 | 0,094134933 | 00:04:28 | 0.041387116 | 0,09534793  |
| 00:04:19 | 0.04246399  | 0,094162995 | 00:04:28 | 0.041363157 | 0,095372768 |
| 00:04:19 | 0.04243878  | 0,094189757 | 00:04:28 | 0.041338346 | 0,095396901 |
| 00:04:19 | 0.042413015 | 0,094217087 | 00:04:28 | 0.04131415  | 0,095422789 |
| 00:04:19 | 0.042388797 | 0,094243708 | 00:04:28 | 0.041291488 | 0,095447948 |
| 00:04:19 | 0.042364696 | 0,094270658 | 00:04:29 | 0.041267188 | 0,095472882 |
| 00:04:20 | 0.042340635 | 0,094298866 | 00:04:29 | 0.041243601 | 0,095499619 |
| 00:04:20 | 0.042315295 | 0,094326666 | 00:04:29 | 0.041218973 | 0,095524533 |
| 00:04:20 | 0.042291774 | 0,094352859 | 00:04:29 | 0.041194601 | 0,095550304 |
| 00:04:20 | 0.042269042 | 0,094378088 | 00:04:29 | 0.041171732 | 0,095576554 |
| 00:04:20 | 0.042244707 | 0,094405901 | 00:04:29 | 0.041148376 | 0,095602211 |
| 00:04:21 | 0.042219522 | 0,094432892 | 00:04:30 | 0.041125455 | 0,095627936 |
| 00:04:21 | 0.042196402 | 0,094459097 | 00:04:30 | 0.041103332 | 0,095653718 |
| 00:04:21 | 0.042172097 | 0,094486279 | 00:04:30 | 0.041079839 | 0,095679409 |
| 00:04:21 | 0.042148089 | 0,094512688 | 00:04:30 | 0.041055323 | 0,09570458  |
| 00:04:21 | 0.042123486 | 0,094539047 | 00:04:31 | 0.041031173 | 0,095729942 |
| 00:04:22 | 0.042098285 | 0,09456602  | 00:04:31 | 0.041006974 | 0,095754842 |
| 00:04:22 | 0.042073906 | 0,094592671 | 00:04:31 | 0.040985426 | 0,095780047 |
| 00:04:22 | 0.042049308 | 0,094619757 | 00:04:31 | 0.040961933 | 0,095805007 |
| 00:04:22 | 0.042024899 | 0,09464675  | 00:04:31 | 0.040938326 | 0,095829645 |
| 00:04:22 | 0.042001243 | 0,094673398 | 00:04:31 | 0.040913897 | 0,095854618 |
| 00:04:23 | 0.041975994 | 0,094699057 | 00:04:32 | 0.040889331 | 0,095880995 |
| 00:04:23 | 0.041951926 | 0,094725023 | 00:04:32 | 0.040865763 | 0,095905856 |
| 00:04:23 | 0.041928936 | 0,094750982 | 00:04:32 | 0.040843018 | 0,095931026 |
| 00:04:23 | 0.041903726 | 0,094777991 | 00:04:32 | 0.040819219 | 0,095956159 |
| 00:04:23 | 0.04187896  | 0,094805036 | 00:04:32 | 0.04079562  | 0,09598013  |
| 00:04:24 | 0.041855935 | 0,094830934 | 00:04:33 | 0.040772615 | 0,096005386 |
| 00:04:24 | 0.041832077 | 0,094857487 | 00:04:33 | 0.04075056  | 0,096029533 |
| 00:04:24 | 0.041808303 | 0,094883391 | 00:04:33 | 0.040728127 | 0,096053824 |
| 00:04:24 | 0.041785208 | 0,094908915 | 00:04:33 | 0.040705567 | 0,096079973 |
| 00:04:24 | 0.041760917 | 0,094936232 | 00:04:33 | 0.040681709 | 0,096105174 |
| 00:04:25 | 0.041738333 | 0,094963036 | 00:04:34 | 0.040659641 | 0,096129741 |
| 00:04:25 | 0.041716023 | 0,094987782 | 00:04:34 | 0.040637524 | 0,096155799 |
| 00:04:25 | 0.041691926 | 0,095012794 | 00:04:34 | 0.040615601 | 0,096180252 |
| 00:04:25 | 0.041668926 | 0,095038065 | 00:04:34 | 0.040592958 | 0,096204408 |
| 00:04:25 | 0.041645924 | 0,095063218 | 00:04:34 | 0.040570293 | 0,096227918 |

|          |             |             |          |             |             |
|----------|-------------|-------------|----------|-------------|-------------|
| 00:04:35 | 0.040547619 | 0,096253065 | 00:04:44 | 0.039526026 | 0,097337475 |
| 00:04:35 | 0.040523832 | 0,096277537 | 00:04:44 | 0.039469419 | 0,09735791  |
| 00:04:35 | 0.040500872 | 0,096301369 | 00:04:44 | 0.039479818 | 0,097384171 |
| 00:04:35 | 0.040477116 | 0,096326553 | 00:04:44 | 0.039464274 | 0,097407507 |
| 00:04:35 | 0.040453468 | 0,096350668 | 00:04:45 | 0.039442212 | 0,097429576 |
| 00:04:36 | 0.040430478 | 0,096374681 | 00:04:45 | 0.039419316 | 0,097453845 |
| 00:04:36 | 0.040408419 | 0,096398038 | 00:04:45 | 0.039372277 | 0,097474261 |
| 00:04:36 | 0.040385074 | 0,09642193  | 00:04:45 | 0.039295875 | 0,097492711 |
| 00:04:36 | 0.040362649 | 0,096445895 | 00:04:45 | 0.039268817 | 0,097516354 |
| 00:04:36 | 0.040341249 | 0,096471309 | 00:04:45 | 0.039248257 | 0,097540108 |
| 00:04:37 | 0.040317903 | 0,09649473  | 00:04:46 | 0.03922802  | 0,097563846 |
| 00:04:37 | 0.040294628 | 0,096518243 | 00:04:46 | 0.039205828 | 0,097586103 |
| 00:04:37 | 0.040274202 | 0,096541958 | 00:04:46 | 0.03918462  | 0,097609003 |
| 00:04:37 | 0.040253355 | 0,096566421 | 00:04:46 | 0.039163831 | 0,097631898 |
| 00:04:37 | 0.040230007 | 0,096590304 | 00:04:46 | 0.039144188 | 0,097654096 |
| 00:04:38 | 0.04020868  | 0,096614035 | 00:04:47 | 0.039124289 | 0,097676873 |
| 00:04:38 | 0.040186642 | 0,09663777  | 00:04:47 | 0.039103266 | 0,097699721 |
| 00:04:38 | 0.040163823 | 0,096661073 | 00:04:47 | 0.039082334 | 0,097722317 |
| 00:04:38 | 0.040141495 | 0,096684294 | 00:04:47 | 0.039060129 | 0,09774559  |
| 00:04:38 | 0.040118672 | 0,096708641 | 00:04:48 | 0.039038999 | 0,097768117 |
| 00:04:39 | 0.040096836 | 0,096732259 | 00:04:48 | 0.039018182 | 0,097790328 |
| 00:04:39 | 0.040075305 | 0,096755988 | 00:04:48 | 0.038999457 | 0,097812403 |
| 00:04:39 | 0.040053347 | 0,096780468 | 00:04:48 | 0.038978831 | 0,097835093 |
| 00:04:39 | 0.040031441 | 0,096804245 | 00:04:48 | 0.038958621 | 0,097857644 |
| 00:04:39 | 0.040009598 | 0,096827605 | 00:04:48 | 0.038938091 | 0,097879844 |
| 00:04:40 | 0.039963198 | 0,096848386 | 00:04:49 | 0.038917045 | 0,097903251 |
| 00:04:40 | 0.039929303 | 0,096870505 | 00:04:49 | 0.03889651  | 0,097925981 |
| 00:04:40 | 0.039884519 | 0,096892368 | 00:04:49 | 0.038875388 | 0,097948893 |
| 00:04:40 | 0.03988333  | 0,096917916 | 00:04:49 | 0.038854406 | 0,097972332 |
| 00:04:40 | 0.039837372 | 0,096938807 | 00:04:49 | 0.038833814 | 0,097994585 |
| 00:04:41 | 0.039812884 | 0,096962023 | 00:04:50 | 0.038814415 | 0,098017887 |
| 00:04:41 | 0.039807365 | 0,09698636  | 00:04:50 | 0.03879226  | 0,098040902 |
| 00:04:41 | 0.039804937 | 0,097011153 | 00:04:50 | 0.038771993 | 0,098063902 |
| 00:04:41 | 0.039808568 | 0,097036211 | 00:04:50 | 0.038751168 | 0,098086967 |
| 00:04:41 | 0.039772443 | 0,097057408 | 00:04:50 | 0.038730963 | 0,098109507 |
| 00:04:42 | 0.039764584 | 0,097082203 | 00:04:51 | 0.038710397 | 0,098131683 |
| 00:04:42 | 0.039743352 | 0,097105524 | 00:04:51 | 0.038690499 | 0,098154858 |
| 00:04:42 | 0.039721794 | 0,097128995 | 00:04:51 | 0.03866865  | 0,098177936 |
| 00:04:42 | 0.039684714 | 0,097151158 | 00:04:51 | 0.038647978 | 0,098200563 |
| 00:04:42 | 0.039677146 | 0,097174239 | 00:04:51 | 0.038628978 | 0,098223206 |
| 00:04:43 | 0.039640824 | 0,097195777 | 00:04:52 | 0.038607298 | 0,098245054 |
| 00:04:43 | 0.039583254 | 0,097215405 | 00:04:52 | 0.038585679 | 0,098267934 |
| 00:04:43 | 0.039535851 | 0,097235895 | 00:04:52 | 0.038565311 | 0,098290017 |
| 00:04:43 | 0.039501131 | 0,097258187 | 00:04:52 | 0.03854529  | 0,098311832 |
| 00:04:43 | 0.039484897 | 0,097282872 | 00:04:52 | 0.038524673 | 0,098333725 |
| 00:04:44 | 0.039520721 | 0,097311828 | 00:04:53 | 0.038505026 | 0,098355688 |

|          |             |             |          |             |             |
|----------|-------------|-------------|----------|-------------|-------------|
| 00:04:53 | 0.038484262 | 0,098377543 | 00:05:02 | 0.037584656 | 0,099374491 |
| 00:04:53 | 0.038464015 | 0,098400159 | 00:05:02 | 0.037566261 | 0,099395903 |
| 00:04:53 | 0.038444059 | 0,098422735 | 00:05:02 | 0.037547421 | 0,099417381 |
| 00:04:53 | 0.038424593 | 0,098444706 | 00:05:03 | 0.037528784 | 0,099438074 |
| 00:04:54 | 0.038404453 | 0,098466787 | 00:05:03 | 0.037508678 | 0,099459169 |
| 00:04:54 | 0.038384113 | 0,098489156 | 00:05:03 | 0.037490188 | 0,099480217 |
| 00:04:54 | 0.038364562 | 0,098511229 | 00:05:03 | 0.037472207 | 0,099501066 |
| 00:04:54 | 0.038344268 | 0,098532993 | 00:05:03 | 0.037453882 | 0,099521443 |
| 00:04:54 | 0.038324152 | 0,098555103 | 00:05:04 | 0.037435425 | 0,099542698 |
| 00:04:55 | 0.038304038 | 0,098578185 | 00:05:04 | 0.037417181 | 0,099563302 |
| 00:04:55 | 0.038282331 | 0,098599511 | 00:05:04 | 0.037398282 | 0,099584378 |
| 00:04:55 | 0.038263314 | 0,098622352 | 00:05:04 | 0.03738058  | 0,099605438 |
| 00:04:55 | 0.038242548 | 0,098644868 | 00:05:04 | 0.037362615 | 0,09962606  |
| 00:04:55 | 0.038224467 | 0,098666643 | 00:05:05 | 0.03734364  | 0,099647409 |
| 00:04:56 | 0.038205399 | 0,09868727  | 00:05:05 | 0.037326308 | 0,099668969 |
| 00:04:56 | 0.038185192 | 0,098708218 | 00:05:05 | 0.037307675 | 0,099689385 |
| 00:04:56 | 0.038164838 | 0,098729416 | 00:05:05 | 0.037289072 | 0,099710079 |
| 00:04:56 | 0.038143966 | 0,098750344 | 00:05:05 | 0.037270795 | 0,099730138 |
| 00:04:56 | 0.038124204 | 0,09877198  | 00:05:06 | 0.037253493 | 0,099751914 |
| 00:04:57 | 0.038103447 | 0,098793676 | 00:05:06 | 0.037235955 | 0,099772396 |
| 00:04:57 | 0.038082578 | 0,098814851 | 00:05:06 | 0.037218568 | 0,09979282  |
| 00:04:57 | 0.038062473 | 0,098835595 | 00:05:06 | 0.037201034 | 0,099812813 |
| 00:04:57 | 0.038042365 | 0,098856907 | 00:05:06 | 0.037183211 | 0,099833544 |
| 00:04:57 | 0.038023435 | 0,098878407 | 00:05:06 | 0.037165189 | 0,099854076 |
| 00:04:58 | 0.038005011 | 0,09890021  | 00:05:07 | 0.037147036 | 0,09987532  |
| 00:04:58 | 0.037986105 | 0,098922523 | 00:05:07 | 0.037128535 | 0,099896163 |
| 00:04:58 | 0.037965733 | 0,09894469  | 00:05:07 | 0.037110814 | 0,099917315 |
| 00:04:58 | 0.037945886 | 0,098966746 | 00:05:07 | 0.037091881 | 0,099938379 |
| 00:04:58 | 0.037926481 | 0,098988668 | 00:05:07 | 0.037073209 | 0,099958659 |
| 00:04:59 | 0.037906445 | 0,099010361 | 00:05:08 | 0.037035637 | 0,099977063 |
| 00:04:59 | 0.037886414 | 0,09903109  | 00:05:08 | 0.037017916 | 0,099997737 |
| 00:04:59 | 0.037866532 | 0,099052897 | 00:05:08 | 0.037023209 | 0,100019583 |
| 00:04:59 | 0.037846456 | 0,099074303 | 00:05:08 | 0.037005184 | 0,100039161 |
| 00:04:59 | 0.037826336 | 0,099095344 | 00:05:08 | 0.036961066 | 0,100057498 |
| 00:05:00 | 0.037807358 | 0,099116764 | 00:05:09 | 0.036942774 | 0,100078345 |
| 00:05:00 | 0.037788592 | 0,099137131 | 00:05:09 | 0.036926079 | 0,100098368 |
| 00:05:00 | 0.037767842 | 0,099158417 | 00:05:09 | 0.036907982 | 0,100118448 |
| 00:05:00 | 0.037748643 | 0,099179837 | 00:05:09 | 0.036889964 | 0,100139026 |
| 00:05:00 | 0.037729727 | 0,099201355 | 00:05:09 | 0.036870619 | 0,100159032 |
| 00:05:01 | 0.037712142 | 0,099221619 | 00:05:10 | 0.036852814 | 0,100179482 |
| 00:05:01 | 0.037692748 | 0,099244139 | 00:05:10 | 0.036835174 | 0,100198318 |
| 00:05:01 | 0.037673172 | 0,099266007 | 00:05:10 | 0.036817333 | 0,100219686 |
| 00:05:01 | 0.037654561 | 0,099287314 | 00:05:10 | 0.036798842 | 0,100239519 |
| 00:05:01 | 0.03763584  | 0,099308841 | 00:05:10 | 0.036779119 | 0,100260031 |
| 00:05:02 | 0.03761791  | 0,099330277 | 00:05:11 | 0.036761685 | 0,100280244 |
| 00:05:02 | 0.037603087 | 0,099352811 | 00:05:11 | 0.036744157 | 0,100300079 |

|          |             |             |          |             |             |
|----------|-------------|-------------|----------|-------------|-------------|
| 00:05:11 | 0.036726956 | 0,100319929 | 00:05:20 | 0.035981448 | 0,101234061 |
| 00:05:11 | 0.036709771 | 0,100339716 | 00:05:20 | 0.035965584 | 0,10125319  |
| 00:05:11 | 0.036691077 | 0,100359468 | 00:05:21 | 0.035948953 | 0,101273692 |
| 00:05:12 | 0.036672997 | 0,100380006 | 00:05:21 | 0.035931949 | 0,101293292 |
| 00:05:12 | 0.036654772 | 0,100400387 | 00:05:21 | 0.035915524 | 0,101313337 |
| 00:05:12 | 0.036635849 | 0,100420751 | 00:05:21 | 0.035900224 | 0,101333444 |
| 00:05:12 | 0.036657282 | 0,10044478  | 00:05:21 | 0.035882913 | 0,101351913 |
| 00:05:12 | 0.036639846 | 0,100464134 | 00:05:21 | 0.035866836 | 0,101371821 |
| 00:05:13 | 0.036622229 | 0,100483905 | 00:05:22 | 0.035849967 | 0,101391286 |
| 00:05:13 | 0.036605069 | 0,100503433 | 00:05:22 | 0.035833706 | 0,101409791 |
| 00:05:13 | 0.036587516 | 0,100522831 | 00:05:22 | 0.035817872 | 0,101429849 |
| 00:05:13 | 0.036569856 | 0,100543094 | 00:05:22 | 0.035753949 | 0,101444365 |
| 00:05:13 | 0.036553324 | 0,100563759 | 00:05:22 | 0.035784676 | 0,101467738 |
| 00:05:14 | 0.036536513 | 0,100583376 | 00:05:23 | 0.035712243 | 0,10148178  |
| 00:05:14 | 0.036518168 | 0,1006043   | 00:05:23 | 0.035690566 | 0,101501182 |
| 00:05:14 | 0.036500179 | 0,100623908 | 00:05:23 | 0.035736893 | 0,101525068 |
| 00:05:14 | 0.036483431 | 0,100643731 | 00:05:23 | 0.035657698 | 0,101538477 |
| 00:05:14 | 0.036466794 | 0,100663307 | 00:05:24 | 0.035668879 | 0,101560167 |
| 00:05:15 | 0.036406899 | 0,100678169 | 00:05:24 | 0.035623258 | 0,101575486 |
| 00:05:15 | 0.036389739 | 0,100698309 | 00:05:24 | 0.035605948 | 0,10159426  |
| 00:05:15 | 0.036372456 | 0,100719282 | 00:05:24 | 0.035589155 | 0,101614014 |
| 00:05:15 | 0.03635483  | 0,100739493 | 00:05:24 | 0.035633181 | 0,1016384   |
| 00:05:15 | 0.036337324 | 0,100759573 | 00:05:24 | 0.035615881 | 0,101656537 |
| 00:05:16 | 0.036320069 | 0,100779358 | 00:05:25 | 0.035598749 | 0,101675578 |
| 00:05:16 | 0.036302856 | 0,100800469 | 00:05:25 | 0.035582028 | 0,101695425 |
| 00:05:16 | 0.036331629 | 0,100824578 | 00:05:25 | 0.035565753 | 0,101713503 |
| 00:05:16 | 0.036268143 | 0,100840299 | 00:05:25 | 0.035550026 | 0,101732501 |
| 00:05:16 | 0.036296248 | 0,100865026 | 00:05:26 | 0.035533711 | 0,101750773 |
| 00:05:17 | 0.036255392 | 0,100883095 | 00:05:26 | 0.035517658 | 0,101769796 |
| 00:05:17 | 0.036264178 | 0,100904443 | 00:05:26 | 0.03550115  | 0,101788088 |
| 00:05:17 | 0.036247074 | 0,10092368  | 00:05:26 | 0.035484445 | 0,101806811 |
| 00:05:17 | 0.03623079  | 0,100943873 | 00:05:26 | 0.035467911 | 0,10182609  |
| 00:05:17 | 0.036213548 | 0,100963374 | 00:05:26 | 0.03545119  | 0,10184431  |
| 00:05:18 | 0.036196639 | 0,100982713 | 00:05:27 | 0.035434753 | 0,101863395 |
| 00:05:18 | 0.03618041  | 0,101002368 | 00:05:27 | 0.035418139 | 0,101881798 |
| 00:05:18 | 0.036162647 | 0,10102222  | 00:05:27 | 0.035400865 | 0,101898931 |
| 00:05:18 | 0.036146364 | 0,101041565 | 00:05:27 | 0.035325982 | 0,101912187 |
| 00:05:18 | 0.036130128 | 0,101060165 | 00:05:27 | 0.035310916 | 0,101930847 |
| 00:05:19 | 0.036114177 | 0,101079134 | 00:05:28 | 0.035294136 | 0,10194902  |
| 00:05:19 | 0.036098541 | 0,101099441 | 00:05:28 | 0.035279059 | 0,101967566 |
| 00:05:19 | 0.036082343 | 0,101118873 | 00:05:28 | 0.035262663 | 0,101986574 |
| 00:05:19 | 0.036065266 | 0,101137759 | 00:05:28 | 0.035245107 | 0,102004781 |
| 00:05:19 | 0.036048669 | 0,101156869 | 00:05:28 | 0.035228365 | 0,102023703 |
| 00:05:20 | 0.036031717 | 0,101177267 | 00:05:29 | 0.035213678 | 0,102041957 |
| 00:05:20 | 0.036015055 | 0,101196066 | 00:05:29 | 0.03525274  | 0,102066389 |
| 00:05:20 | 0.035998504 | 0,10121516  | 00:05:29 | 0.035237803 | 0,102084964 |

|          |             |             |          |             |             |
|----------|-------------|-------------|----------|-------------|-------------|
| 00:05:29 | 0.035220528 | 0,102103813 | 00:05:38 | 0.034444442 | 0,102931477 |
| 00:05:29 | 0.035205096 | 0,102121904 | 00:05:39 | 0.034439002 | 0,102949869 |
| 00:05:30 | 0.035187484 | 0,102139273 | 00:05:39 | 0.034461742 | 0,102970824 |
| 00:05:30 | 0.035170554 | 0,102158475 | 00:05:39 | 0.034446825 | 0,10298904  |
| 00:05:30 | 0.035155005 | 0,102177418 | 00:05:39 | 0.03443181  | 0,10300773  |
| 00:05:30 | 0.035139385 | 0,102194946 | 00:05:39 | 0.034388974 | 0,103022406 |
| 00:05:30 | 0.035124233 | 0,102213553 | 00:05:39 | 0.034355187 | 0,103038443 |
| 00:05:31 | 0.035108059 | 0,102231431 | 00:05:40 | 0.034340132 | 0,103055976 |
| 00:05:31 | 0.035057405 | 0,102246966 | 00:05:40 | 0.034324954 | 0,103073144 |
| 00:05:31 | 0.035075587 | 0,102267622 | 00:05:40 | 0.034308838 | 0,103090549 |
| 00:05:31 | 0.035007454 | 0,102281029 | 00:05:40 | 0.034292934 | 0,103108726 |
| 00:05:31 | 0.034991759 | 0,102298967 | 00:05:40 | 0.034277834 | 0,103125665 |
| 00:05:32 | 0.034976932 | 0,102317223 | 00:05:41 | 0.034262266 | 0,103142652 |
| 00:05:32 | 0.034960386 | 0,102336202 | 00:05:41 | 0.034246918 | 0,103159669 |
| 00:05:32 | 0.034944766 | 0,102354476 | 00:05:41 | 0.034231026 | 0,103177558 |
| 00:05:32 | 0.034928534 | 0,102373065 | 00:05:41 | 0.034216135 | 0,103193786 |
| 00:05:32 | 0.034912408 | 0,102391177 | 00:05:42 | 0.034199855 | 0,103211138 |
| 00:05:33 | 0.034896659 | 0,102409665 | 00:05:42 | 0.03418562  | 0,103228729 |
| 00:05:33 | 0.034880364 | 0,102427878 | 00:05:42 | 0.034170094 | 0,103245785 |
| 00:05:33 | 0.034864175 | 0,102445617 | 00:05:42 | 0.034155039 | 0,103263403 |
| 00:05:33 | 0.034847602 | 0,102463699 | 00:05:42 | 0.034139828 | 0,103279725 |
| 00:05:33 | 0.034830933 | 0,10248219  | 00:05:42 | 0.034125472 | 0,103297189 |
| 00:05:34 | 0.034814378 | 0,102500174 | 00:05:43 | 0.034111805 | 0,103314649 |
| 00:05:34 | 0.034798714 | 0,102518058 | 00:05:43 | 0.034095774 | 0,103331702 |
| 00:05:34 | 0.034783519 | 0,102536691 | 00:05:43 | 0.034080568 | 0,103348873 |
| 00:05:34 | 0.034768502 | 0,102555492 | 00:05:43 | 0.034065776 | 0,103365915 |
| 00:05:34 | 0.034752909 | 0,102573217 | 00:05:43 | 0.034050295 | 0,103382474 |
| 00:05:35 | 0.034736746 | 0,102591092 | 00:05:44 | 0.034035937 | 0,103399075 |
| 00:05:35 | 0.034720776 | 0,102609308 | 00:05:44 | 0.034020369 | 0,10341664  |
| 00:05:35 | 0.034705817 | 0,102627202 | 00:05:44 | 0.034004747 | 0,103433283 |
| 00:05:35 | 0.03469106  | 0,102644628 | 00:05:44 | 0.033989046 | 0,103450654 |
| 00:05:35 | 0.034674671 | 0,102662353 | 00:05:44 | 0.033973471 | 0,103467536 |
| 00:05:36 | 0.034658426 | 0,102680528 | 00:05:45 | 0.033957761 | 0,10348501  |
| 00:05:36 | 0.034641597 | 0,102698257 | 00:05:45 | 0.03394236  | 0,103502821 |
| 00:05:36 | 0.034625609 | 0,102715688 | 00:05:45 | 0.033927596 | 0,103520272 |
| 00:05:36 | 0.034609676 | 0,102733702 | 00:05:45 | 0.033912213 | 0,103537199 |
| 00:05:36 | 0.034595563 | 0,102751397 | 00:05:45 | 0.033898392 | 0,103554507 |
| 00:05:37 | 0.034580292 | 0,102768917 | 00:05:46 | 0.03388447  | 0,103571925 |
| 00:05:37 | 0.034564365 | 0,102787203 | 00:05:46 | 0.033870529 | 0,103587549 |
| 00:05:37 | 0.034549201 | 0,102804386 | 00:05:46 | 0.033856442 | 0,10360465  |
| 00:05:37 | 0.034533596 | 0,102823162 | 00:05:46 | 0.033842383 | 0,103621771 |
| 00:05:37 | 0.034518535 | 0,102841159 | 00:05:46 | 0.033827402 | 0,103639259 |
| 00:05:38 | 0.034504461 | 0,102859198 | 00:05:47 | 0.03381251  | 0,10365574  |
| 00:05:38 | 0.034536276 | 0,102881859 | 00:05:47 | 0.03379733  | 0,103672212 |
| 00:05:38 | 0.034475957 | 0,102895298 | 00:05:47 | 0.033781641 | 0,103688807 |
| 00:05:38 | 0.034460942 | 0,102912989 | 00:05:47 | 0.033765808 | 0,103705582 |

|          |             |             |          |             |             |
|----------|-------------|-------------|----------|-------------|-------------|
| 00:05:47 | 0.033751433 | 0,103722302 | 00:05:57 | 0.033086679 | 0,104480323 |
| 00:05:48 | 0.033736605 | 0,103739484 | 00:05:57 | 0.033072803 | 0,104496946 |
| 00:05:48 | 0.033722026 | 0,103756164 | 00:05:57 | 0.033058985 | 0,104513127 |
| 00:05:48 | 0.033708797 | 0,103773193 | 00:05:57 | 0.033046689 | 0,104529237 |
| 00:05:48 | 0.033693586 | 0,103789134 | 00:05:57 | 0.033032892 | 0,104545987 |
| 00:05:48 | 0.033678949 | 0,103804992 | 00:05:57 | 0.033018275 | 0,104562285 |
| 00:05:49 | 0.033665168 | 0,103821799 | 00:05:58 | 0.033003955 | 0,104578351 |
| 00:05:49 | 0.03365157  | 0,103838604 | 00:05:58 | 0.03299067  | 0,10459446  |
| 00:05:49 | 0.033634568 | 0,103855083 | 00:05:58 | 0.03297765  | 0,104610356 |
| 00:05:49 | 0.033619966 | 0,103872349 | 00:05:58 | 0.032963141 | 0,104626738 |
| 00:05:49 | 0.033605336 | 0,103890627 | 00:05:59 | 0.032948954 | 0,104641159 |
| 00:05:50 | 0.033590943 | 0,103907005 | 00:05:59 | 0.032934623 | 0,104657028 |
| 00:05:50 | 0.033576342 | 0,103922642 | 00:05:59 | 0.032921718 | 0,104673196 |
| 00:05:50 | 0.033561835 | 0,10393936  | 00:05:59 | 0.032907085 | 0,10468859  |
| 00:05:50 | 0.033546659 | 0,103956421 | 00:05:59 | 0.032894395 | 0,104704383 |
| 00:05:50 | 0.033531632 | 0,103972476 | 00:05:59 | 0.032880698 | 0,104720182 |
| 00:05:51 | 0.033517072 | 0,103988932 | 00:06:00 | 0.032867417 | 0,104735653 |
| 00:05:51 | 0.033503708 | 0,104005725 | 00:06:00 | 0.032852528 | 0,104750265 |
| 00:05:51 | 0.033488729 | 0,104021683 | 00:06:00 | 0.03283907  | 0,104766181 |
| 00:05:51 | 0.03347332  | 0,104038587 | 00:06:00 | 0.032826565 | 0,104781784 |
| 00:05:51 | 0.0334596   | 0,104055233 | 00:06:00 | 0.032812804 | 0,104796859 |
| 00:05:52 | 0.033444679 | 0,104071732 | 00:06:01 | 0.032800125 | 0,10481228  |
| 00:05:52 | 0.033431499 | 0,10408858  | 00:06:01 | 0.032785966 | 0,104829109 |
| 00:05:52 | 0.033415764 | 0,104104125 | 00:06:01 | 0.032775178 | 0,104846347 |
| 00:05:52 | 0.033401837 | 0,104120511 | 00:06:01 | 0.032761724 | 0,104862587 |
| 00:05:52 | 0.033388195 | 0,104137241 | 00:06:01 | 0.032748914 | 0,104878561 |
| 00:05:53 | 0.033373347 | 0,104153145 | 00:06:02 | 0.032735545 | 0,104894637 |
| 00:05:53 | 0.033358318 | 0,104169597 | 00:06:02 | 0.032722295 | 0,104910277 |
| 00:05:53 | 0.033344108 | 0,104186197 | 00:06:02 | 0.032708368 | 0,104925213 |
| 00:05:53 | 0.03333063  | 0,10420291  | 00:06:02 | 0.032694803 | 0,104940719 |
| 00:05:53 | 0.033317008 | 0,104219327 | 00:06:02 | 0.032681938 | 0,104955978 |
| 00:05:54 | 0.033301897 | 0,104235575 | 00:06:03 | 0.032668843 | 0,104971667 |
| 00:05:54 | 0.03328778  | 0,104252114 | 00:06:03 | 0.032654467 | 0,104987909 |
| 00:05:54 | 0.033273317 | 0,104268296 | 00:06:03 | 0.032640945 | 0,105003998 |
| 00:05:54 | 0.033259199 | 0,104284635 | 00:06:03 | 0.032627567 | 0,105019096 |
| 00:05:54 | 0.033245006 | 0,104300873 | 00:06:03 | 0.032614729 | 0,105034793 |
| 00:05:55 | 0.033229669 | 0,104317279 | 00:06:04 | 0.032600866 | 0,105050294 |
| 00:05:55 | 0.033214929 | 0,104333306 | 00:06:04 | 0.032587489 | 0,105066049 |
| 00:05:55 | 0.033199817 | 0,104349188 | 00:06:04 | 0.032574183 | 0,105081716 |
| 00:05:55 | 0.03318496  | 0,104366509 | 00:06:04 | 0.032560157 | 0,105097672 |
| 00:05:55 | 0.033170456 | 0,104382959 | 00:06:04 | 0.032546025 | 0,105113596 |
| 00:05:56 | 0.033155158 | 0,104399136 | 00:06:05 | 0.032533406 | 0,10512906  |
| 00:05:56 | 0.033140451 | 0,10441542  | 00:06:05 | 0.032519871 | 0,105144237 |
| 00:05:56 | 0.033127059 | 0,104431711 | 00:06:05 | 0.032507271 | 0,105159716 |
| 00:05:56 | 0.033113511 | 0,104447933 | 00:06:05 | 0.032493487 | 0,105175374 |
| 00:05:56 | 0.033100126 | 0,104464328 | 00:06:05 | 0.032480627 | 0,10519131  |

|          |             |             |          |             |             |
|----------|-------------|-------------|----------|-------------|-------------|
| 00:06:06 | 0.032467293 | 0,105206573 | 00:06:15 | 0.031860145 | 0,105908161 |
| 00:06:06 | 0.032453766 | 0,105222095 | 00:06:15 | 0.031847726 | 0,105923413 |
| 00:06:06 | 0.032440117 | 0,105238541 | 00:06:15 | 0.031835702 | 0,105938169 |
| 00:06:06 | 0.032426966 | 0,10525373  | 00:06:15 | 0.031822742 | 0,105953499 |
| 00:06:06 | 0.032413899 | 0,10526924  | 00:06:15 | 0.031810111 | 0,105968142 |
| 00:06:07 | 0.032401136 | 0,105284801 | 00:06:16 | 0.031797772 | 0,105983152 |
| 00:06:07 | 0.032387864 | 0,10530095  | 00:06:16 | 0.031784856 | 0,105998383 |
| 00:06:07 | 0.032376051 | 0,105315946 | 00:06:16 | 0.031770781 | 0,106013204 |
| 00:06:07 | 0.032361567 | 0,105331284 | 00:06:16 | 0.031758196 | 0,106027235 |
| 00:06:07 | 0.032349266 | 0,105347321 | 00:06:17 | 0.031744677 | 0,106041954 |
| 00:06:08 | 0.032336883 | 0,105363021 | 00:06:17 | 0.031731453 | 0,1060571   |
| 00:06:08 | 0.032324007 | 0,105377844 | 00:06:17 | 0.031720281 | 0,106072252 |
| 00:06:08 | 0.032310814 | 0,105393367 | 00:06:17 | 0.031707759 | 0,106086598 |
| 00:06:08 | 0.032297737 | 0,105409142 | 00:06:17 | 0.031694806 | 0,106101475 |
| 00:06:08 | 0.032283415 | 0,105424627 | 00:06:17 | 0.03168303  | 0,106116358 |
| 00:06:09 | 0.03226952  | 0,105439933 | 00:06:18 | 0.031671343 | 0,106131462 |
| 00:06:09 | 0.032255902 | 0,105454929 | 00:06:18 | 0.031658123 | 0,106145866 |
| 00:06:09 | 0.032242382 | 0,105470081 | 00:06:18 | 0.031645666 | 0,106160378 |
| 00:06:09 | 0.032228705 | 0,105485873 | 00:06:18 | 0.031633924 | 0,106174827 |
| 00:06:09 | 0.032215759 | 0,105501404 | 00:06:18 | 0.031621197 | 0,106188964 |
| 00:06:10 | 0.032200792 | 0,105517247 | 00:06:19 | 0.031608315 | 0,106203985 |
| 00:06:10 | 0.032187785 | 0,105532525 | 00:06:19 | 0.031596399 | 0,106218459 |
| 00:06:10 | 0.032174161 | 0,105547504 | 00:06:19 | 0.031583709 | 0,106232285 |
| 00:06:10 | 0.03216085  | 0,105562682 | 00:06:19 | 0.031571434 | 0,106246699 |
| 00:06:10 | 0.032147179 | 0,105578569 | 00:06:19 | 0.031559057 | 0,106261171 |
| 00:06:11 | 0.032133268 | 0,105593233 | 00:06:20 | 0.031546242 | 0,106275913 |
| 00:06:11 | 0.032119597 | 0,105607851 | 00:06:20 | 0.031534205 | 0,106290231 |
| 00:06:11 | 0.032106712 | 0,105622759 | 00:06:20 | 0.03152196  | 0,106304894 |
| 00:06:11 | 0.032093472 | 0,105638272 | 00:06:20 | 0.031509077 | 0,106319683 |
| 00:06:11 | 0.032079424 | 0,105653284 | 00:06:20 | 0.031496001 | 0,106334624 |
| 00:06:12 | 0.032067345 | 0,105668775 | 00:06:21 | 0.031484553 | 0,106349244 |
| 00:06:12 | 0.032054405 | 0,105683089 | 00:06:21 | 0.031472378 | 0,106362756 |
| 00:06:12 | 0.032041591 | 0,105698571 | 00:06:21 | 0.031461149 | 0,106377771 |
| 00:06:12 | 0.032028314 | 0,105714105 | 00:06:21 | 0.031448614 | 0,106392031 |
| 00:06:12 | 0.032015807 | 0,105729098 | 00:06:21 | 0.031435379 | 0,106406769 |
| 00:06:13 | 0.032002767 | 0,105744384 | 00:06:22 | 0.031423424 | 0,106420699 |
| 00:06:13 | 0.031990661 | 0,105759639 | 00:06:22 | 0.031411406 | 0,106434828 |
| 00:06:13 | 0.031978237 | 0,105774204 | 00:06:22 | 0.031399784 | 0,106449037 |
| 00:06:13 | 0.031965333 | 0,105789177 | 00:06:22 | 0.03138827  | 0,10646338  |
| 00:06:13 | 0.031951946 | 0,105803926 | 00:06:22 | 0.031376208 | 0,106478517 |
| 00:06:14 | 0.03193826  | 0,105818382 | 00:06:23 | 0.03136372  | 0,106492851 |
| 00:06:14 | 0.031926075 | 0,105832863 | 00:06:23 | 0.031351204 | 0,106507491 |
| 00:06:14 | 0.031913088 | 0,105847782 | 00:06:23 | 0.031338707 | 0,10652266  |
| 00:06:14 | 0.031899825 | 0,105862661 | 00:06:23 | 0.031326624 | 0,106536352 |
| 00:06:14 | 0.031886612 | 0,10587778  | 00:06:23 | 0.031314674 | 0,106550109 |
| 00:06:14 | 0.031872753 | 0,105892913 | 00:06:24 | 0.031303461 | 0,106564245 |

|          |             |             |          |             |             |
|----------|-------------|-------------|----------|-------------|-------------|
| 00:06:24 | 0.031291996 | 0,10657837  | 00:06:33 | 0.030742587 | 0,107223697 |
| 00:06:24 | 0.031279635 | 0,106592747 | 00:06:33 | 0.030731235 | 0,107237274 |
| 00:06:24 | 0.031268172 | 0,106606832 | 00:06:33 | 0.030719504 | 0,10725159  |
| 00:06:24 | 0.031256223 | 0,106620717 | 00:06:34 | 0.030708545 | 0,107266075 |
| 00:06:25 | 0.031243627 | 0,106634739 | 00:06:34 | 0.030697147 | 0,107279198 |
| 00:06:25 | 0.031231155 | 0,106648978 | 00:06:34 | 0.03068548  | 0,107293565 |
| 00:06:25 | 0.031220028 | 0,106663104 | 00:06:34 | 0.030674337 | 0,107307758 |
| 00:06:25 | 0.031208695 | 0,106677672 | 00:06:34 | 0.030662686 | 0,107321144 |
| 00:06:25 | 0.031196038 | 0,106692722 | 00:06:35 | 0.030651295 | 0,107333873 |
| 00:06:26 | 0.031183459 | 0,106707343 | 00:06:35 | 0.030639595 | 0,10734834  |
| 00:06:26 | 0.031171586 | 0,106720965 | 00:06:35 | 0.03062755  | 0,107361648 |
| 00:06:26 | 0.031159484 | 0,106734335 | 00:06:35 | 0.030615967 | 0,107374953 |
| 00:06:26 | 0.031147822 | 0,106748936 | 00:06:35 | 0.030602957 | 0,107388063 |
| 00:06:26 | 0.03113424  | 0,106763435 | 00:06:35 | 0.030590696 | 0,107401316 |
| 00:06:27 | 0.031121889 | 0,10677811  | 00:06:36 | 0.030578226 | 0,107414822 |
| 00:06:27 | 0.031110018 | 0,106792131 | 00:06:36 | 0.030566559 | 0,10742862  |
| 00:06:27 | 0.031097066 | 0,106806112 | 00:06:36 | 0.030554922 | 0,107441722 |
| 00:06:27 | 0.031086012 | 0,106819519 | 00:06:36 | 0.030542565 | 0,107455154 |
| 00:06:27 | 0.031072937 | 0,106834003 | 00:06:36 | 0.030531338 | 0,107468601 |
| 00:06:28 | 0.031060639 | 0,10684769  | 00:06:37 | 0.030519965 | 0,107481667 |
| 00:06:28 | 0.031048895 | 0,106861825 | 00:06:37 | 0.030508956 | 0,107495359 |
| 00:06:28 | 0.031038102 | 0,106875898 | 00:06:37 | 0.030497948 | 0,107509543 |
| 00:06:28 | 0.031026003 | 0,106889889 | 00:06:37 | 0.030486418 | 0,107523303 |
| 00:06:28 | 0.031014198 | 0,106904569 | 00:06:37 | 0.030476709 | 0,107537471 |
| 00:06:29 | 0.031002123 | 0,106918618 | 00:06:38 | 0.030464904 | 0,107550795 |
| 00:06:29 | 0.030988937 | 0,106932973 | 00:06:38 | 0.030452969 | 0,107564145 |
| 00:06:29 | 0.0309777   | 0,106946783 | 00:06:38 | 0.030441517 | 0,1075775   |
| 00:06:29 | 0.030966498 | 0,106961013 | 00:06:38 | 0.030430171 | 0,107591221 |
| 00:06:29 | 0.030954508 | 0,106974966 | 00:06:38 | 0.030417924 | 0,107604987 |
| 00:06:30 | 0.03094394  | 0,106988677 | 00:06:39 | 0.030407599 | 0,10761762  |
| 00:06:30 | 0.030931195 | 0,107002522 | 00:06:39 | 0.030396867 | 0,107630855 |
| 00:06:30 | 0.030917731 | 0,10701658  | 00:06:39 | 0.030385863 | 0,107645256 |
| 00:06:30 | 0.030904764 | 0,107030805 | 00:06:39 | 0.030373864 | 0,107657909 |
| 00:06:30 | 0.030892159 | 0,107045053 | 00:06:39 | 0.030362793 | 0,107671053 |
| 00:06:31 | 0.030880494 | 0,107059168 | 00:06:40 | 0.030351812 | 0,107684389 |
| 00:06:31 | 0.030867951 | 0,107072657 | 00:06:40 | 0.030341061 | 0,107697063 |
| 00:06:31 | 0.030857009 | 0,107086572 | 00:06:40 | 0.030329371 | 0,107710071 |
| 00:06:31 | 0.030845797 | 0,10710097  | 00:06:40 | 0.030318232 | 0,107723436 |
| 00:06:31 | 0.030835373 | 0,1071141   | 00:06:40 | 0.030307307 | 0,107737386 |
| 00:06:32 | 0.030823933 | 0,107127988 | 00:06:41 | 0.03029581  | 0,10775005  |
| 00:06:32 | 0.030812706 | 0,107141763 | 00:06:41 | 0.030285125 | 0,107762995 |
| 00:06:32 | 0.030800451 | 0,107155532 | 00:06:41 | 0.030272624 | 0,1077765   |
| 00:06:32 | 0.030789497 | 0,107169317 | 00:06:41 | 0.030262951 | 0,107789779 |
| 00:06:32 | 0.030777292 | 0,107183083 | 00:06:41 | 0.030251129 | 0,107802786 |
| 00:06:32 | 0.030765144 | 0,107196627 | 00:06:42 | 0.030240406 | 0,107816067 |
| 00:06:33 | 0.030754107 | 0,107210327 | 00:06:42 | 0.030229237 | 0,107829425 |

|          |             |             |          |             |             |
|----------|-------------|-------------|----------|-------------|-------------|
| 00:06:42 | 0.030217814 | 0,107842471 | 00:06:51 | 0.029715169 | 0,108441234 |
| 00:06:42 | 0.030206565 | 0,107855551 | 00:06:51 | 0.029704358 | 0,108453393 |
| 00:06:42 | 0.030194899 | 0,107868387 | 00:06:52 | 0.02969404  | 0,108466244 |
| 00:06:43 | 0.030183697 | 0,107881398 | 00:06:52 | 0.029683058 | 0,108479019 |
| 00:06:43 | 0.030172622 | 0,107895239 | 00:06:52 | 0.029671451 | 0,108491401 |
| 00:06:43 | 0.030161912 | 0,107908495 | 00:06:52 | 0.029660604 | 0,108503085 |
| 00:06:43 | 0.030150787 | 0,107921607 | 00:06:52 | 0.029650137 | 0,108515814 |
| 00:06:43 | 0.030138622 | 0,107934594 | 00:06:53 | 0.029639184 | 0,108528487 |
| 00:06:44 | 0.030127441 | 0,107948464 | 00:06:53 | 0.029627431 | 0,108540759 |
| 00:06:44 | 0.030116176 | 0,107961607 | 00:06:53 | 0.029617037 | 0,108553205 |
| 00:06:44 | 0.030104545 | 0,107974741 | 00:06:53 | 0.029605868 | 0,108565264 |
| 00:06:44 | 0.030093267 | 0,107987815 | 00:06:53 | 0.029594706 | 0,108577682 |
| 00:06:44 | 0.03008226  | 0,108000454 | 00:06:53 | 0.029583772 | 0,108590399 |
| 00:06:45 | 0.0300719   | 0,108014015 | 00:06:54 | 0.029574255 | 0,108603102 |
| 00:06:45 | 0.030060264 | 0,108027047 | 00:06:54 | 0.029562567 | 0,108615955 |
| 00:06:45 | 0.030049637 | 0,108040616 | 00:06:54 | 0.029551973 | 0,108628164 |
| 00:06:45 | 0.030038637 | 0,10805367  | 00:06:54 | 0.029541062 | 0,108640534 |
| 00:06:45 | 0.030028159 | 0,108066853 | 00:06:54 | 0.029531255 | 0,108652346 |
| 00:06:46 | 0.030016886 | 0,10808028  | 00:06:55 | 0.029519366 | 0,108665345 |
| 00:06:46 | 0.030005706 | 0,108093661 | 00:06:55 | 0.029508238 | 0,10867799  |
| 00:06:46 | 0.029995121 | 0,108107074 | 00:06:55 | 0.029497706 | 0,108690938 |
| 00:06:46 | 0.029983752 | 0,108120278 | 00:06:55 | 0.029488451 | 0,108703738 |
| 00:06:46 | 0.029972264 | 0,108132889 | 00:06:55 | 0.029477636 | 0,108715629 |
| 00:06:47 | 0.029960599 | 0,108145825 | 00:06:56 | 0.029466788 | 0,108728225 |
| 00:06:47 | 0.029950008 | 0,10815855  | 00:06:56 | 0.029455937 | 0,108741097 |
| 00:06:47 | 0.02993973  | 0,108171291 | 00:06:56 | 0.029444506 | 0,108753946 |
| 00:06:47 | 0.029928337 | 0,108183636 | 00:06:56 | 0.029433504 | 0,108766403 |
| 00:06:47 | 0.029917074 | 0,108196039 | 00:06:56 | 0.029421935 | 0,108778752 |
| 00:06:48 | 0.029906161 | 0,108208855 | 00:06:57 | 0.029410939 | 0,108791099 |
| 00:06:48 | 0.02989656  | 0,108222296 | 00:06:57 | 0.029400123 | 0,108803982 |
| 00:06:48 | 0.029886963 | 0,108235853 | 00:06:57 | 0.029389316 | 0,108816878 |
| 00:06:48 | 0.029876004 | 0,108249066 | 00:06:57 | 0.029378996 | 0,108829676 |
| 00:06:48 | 0.029865745 | 0,108261646 | 00:06:57 | 0.029367508 | 0,108842254 |
| 00:06:48 | 0.029854646 | 0,108275086 | 00:06:58 | 0.029356741 | 0,108854482 |
| 00:06:49 | 0.029844126 | 0,108287957 | 00:06:58 | 0.029344963 | 0,108867062 |
| 00:06:49 | 0.02983336  | 0,108300974 | 00:06:58 | 0.029333428 | 0,108879294 |
| 00:06:49 | 0.029823367 | 0,108313481 | 00:06:58 | 0.029322836 | 0,108891278 |
| 00:06:49 | 0.029813271 | 0,108325917 | 00:06:58 | 0.029311423 | 0,108904153 |
| 00:06:50 | 0.029802027 | 0,108338839 | 00:06:59 | 0.029301203 | 0,108916628 |
| 00:06:50 | 0.029790943 | 0,108351582 | 00:06:59 | 0.029290185 | 0,108928714 |
| 00:06:50 | 0.029779728 | 0,108364133 | 00:06:59 | 0.029279423 | 0,108941447 |
| 00:06:50 | 0.029768975 | 0,108376866 | 00:06:59 | 0.029269246 | 0,108953041 |
| 00:06:50 | 0.029758283 | 0,108389449 | 00:06:59 | 0.029259112 | 0,108965724 |
| 00:06:51 | 0.029747688 | 0,10840192  | 00:07:00 | 0.029249002 | 0,108977673 |
| 00:06:51 | 0.029736602 | 0,108414643 | 00:07:00 | 0.029237844 | 0,108990373 |
| 00:06:51 | 0.029726305 | 0,108428313 | 00:07:00 | 0.02922667  | 0,10900245  |

|          |             |             |          |             |             |
|----------|-------------|-------------|----------|-------------|-------------|
| 00:07:00 | 0.029215537 | 0,109015237 | 00:07:09 | 0.028739695 | 0,109564133 |
| 00:07:00 | 0.029205242 | 0,109027525 | 00:07:09 | 0.028729647 | 0,109576042 |
| 00:07:01 | 0.029194582 | 0,109039484 | 00:07:10 | 0.0287196   | 0,109588005 |
| 00:07:01 | 0.02918429  | 0,109051608 | 00:07:10 | 0.028710527 | 0,109599852 |
| 00:07:01 | 0.029173549 | 0,109064447 | 00:07:10 | 0.028699927 | 0,109611795 |
| 00:07:01 | 0.029162587 | 0,109077098 | 00:07:10 | 0.028689623 | 0,109624069 |
| 00:07:01 | 0.029152008 | 0,109088622 | 00:07:11 | 0.028679091 | 0,109636155 |
| 00:07:02 | 0.029141067 | 0,109100738 | 00:07:11 | 0.028668232 | 0,109647229 |
| 00:07:02 | 0.029131467 | 0,109112305 | 00:07:11 | 0.028658505 | 0,109658823 |
| 00:07:02 | 0.029120391 | 0,109124395 | 00:07:11 | 0.02864786  | 0,109670138 |
| 00:07:02 | 0.029110249 | 0,109136438 | 00:07:11 | 0.028637533 | 0,109681307 |
| 00:07:02 | 0.029099966 | 0,109148188 | 00:07:11 | 0.028626505 | 0,109692807 |
| 00:07:03 | 0.029089281 | 0,109160688 | 00:07:12 | 0.028616551 | 0,109703925 |
| 00:07:03 | 0.029078689 | 0,109173351 | 00:07:12 | 0.0286066   | 0,109715576 |
| 00:07:03 | 0.029068009 | 0,109185182 | 00:07:12 | 0.028597252 | 0,109727525 |
| 00:07:03 | 0.029057869 | 0,10919715  | 00:07:12 | 0.02858731  | 0,109739241 |
| 00:07:03 | 0.02904661  | 0,109210229 | 00:07:13 | 0.028577401 | 0,109751117 |
| 00:07:04 | 0.029036582 | 0,109221983 | 00:07:13 | 0.028567438 | 0,109763305 |
| 00:07:04 | 0.029025955 | 0,109234163 | 00:07:13 | 0.028557462 | 0,109774625 |
| 00:07:04 | 0.029015912 | 0,109245992 | 00:07:13 | 0.028547226 | 0,10978554  |
| 00:07:04 | 0.029005084 | 0,109258301 | 00:07:13 | 0.028538045 | 0,109796847 |
| 00:07:04 | 0.028994723 | 0,109270284 | 00:07:13 | 0.028526995 | 0,109809096 |
| 00:07:05 | 0.028984619 | 0,109282458 | 00:07:14 | 0.028517843 | 0,109820796 |
| 00:07:05 | 0.028973857 | 0,109294221 | 00:07:14 | 0.028507921 | 0,109832758 |
| 00:07:05 | 0.028962974 | 0,109306821 | 00:07:14 | 0.028498613 | 0,109845601 |
| 00:07:05 | 0.02895311  | 0,109318917 | 00:07:14 | 0.028488485 | 0,109857232 |
| 00:07:05 | 0.02894305  | 0,109331037 | 00:07:14 | 0.028478383 | 0,109869047 |
| 00:07:06 | 0.02893241  | 0,109342802 | 00:07:15 | 0.028468103 | 0,109880376 |
| 00:07:06 | 0.028921836 | 0,109354399 | 00:07:15 | 0.028458768 | 0,109892364 |
| 00:07:06 | 0.028912338 | 0,109366055 | 00:07:15 | 0.028448341 | 0,109903756 |
| 00:07:06 | 0.028902338 | 0,109377515 | 00:07:15 | 0.028439185 | 0,10991521  |
| 00:07:06 | 0.02889157  | 0,109388905 | 00:07:15 | 0.028429215 | 0,109926644 |
| 00:07:07 | 0.028881604 | 0,109400847 | 00:07:16 | 0.028418947 | 0,109938609 |
| 00:07:07 | 0.028871307 | 0,10941243  | 00:07:16 | 0.02840912  | 0,109950616 |
| 00:07:07 | 0.028862501 | 0,109424101 | 00:07:16 | 0.028399794 | 0,109962673 |
| 00:07:07 | 0.028852774 | 0,109435284 | 00:07:16 | 0.028389902 | 0,10997461  |
| 00:07:07 | 0.02884241  | 0,109447105 | 00:07:16 | 0.028379939 | 0,109985705 |
| 00:07:08 | 0.028832351 | 0,109458761 | 00:07:17 | 0.028369687 | 0,109996827 |
| 00:07:08 | 0.028821956 | 0,109470829 | 00:07:17 | 0.028360058 | 0,110008584 |
| 00:07:08 | 0.028812287 | 0,109482329 | 00:07:17 | 0.028349511 | 0,110019843 |
| 00:07:08 | 0.028802318 | 0,10949417  | 00:07:17 | 0.028340275 | 0,110031408 |
| 00:07:08 | 0.028791009 | 0,109506182 | 00:07:17 | 0.028330521 | 0,110042995 |
| 00:07:08 | 0.028780991 | 0,109517853 | 00:07:18 | 0.028320639 | 0,110054746 |
| 00:07:09 | 0.028770381 | 0,109529439 | 00:07:18 | 0.028311258 | 0,110066632 |
| 00:07:09 | 0.028760277 | 0,109541009 | 00:07:18 | 0.028301766 | 0,11007836  |
| 00:07:09 | 0.028749792 | 0,1095528   | 00:07:18 | 0.028292294 | 0,110089184 |

|          |             |             |          |             |             |
|----------|-------------|-------------|----------|-------------|-------------|
| 00:07:18 | 0.028282559 | 0,110101087 | 00:07:28 | 0.027843536 | 0,110617088 |
| 00:07:19 | 0.028272775 | 0,11011291  | 00:07:28 | 0.02783488  | 0,110628245 |
| 00:07:19 | 0.028263675 | 0,110124339 | 00:07:28 | 0.02782585  | 0,110639422 |
| 00:07:19 | 0.028253848 | 0,110135901 | 00:07:28 | 0.02781613  | 0,110650865 |
| 00:07:19 | 0.028243764 | 0,110147256 | 00:07:28 | 0.027807248 | 0,110661434 |
| 00:07:19 | 0.02823442  | 0,110159208 | 00:07:28 | 0.027798362 | 0,110672061 |
| 00:07:20 | 0.028223905 | 0,110170032 | 00:07:29 | 0.027788681 | 0,110683106 |
| 00:07:20 | 0.028213998 | 0,110181825 | 00:07:29 | 0.027778969 | 0,110693832 |
| 00:07:20 | 0.02820413  | 0,110193555 | 00:07:29 | 0.027769045 | 0,110704338 |
| 00:07:20 | 0.02819403  | 0,110204558 | 00:07:29 | 0.027760454 | 0,110715021 |
| 00:07:20 | 0.028184241 | 0,110215796 | 00:07:29 | 0.027751441 | 0,11072601  |
| 00:07:21 | 0.028175337 | 0,110226578 | 00:07:30 | 0.027741925 | 0,110737832 |
| 00:07:21 | 0.028164704 | 0,110238996 | 00:07:30 | 0.027732655 | 0,110748168 |
| 00:07:21 | 0.028155203 | 0,11025012  | 00:07:30 | 0.027723388 | 0,110758354 |
| 00:07:21 | 0.028146072 | 0,110261807 | 00:07:30 | 0.027713841 | 0,110768619 |
| 00:07:21 | 0.028136573 | 0,110272748 | 00:07:30 | 0.027705449 | 0,110779279 |
| 00:07:22 | 0.02812599  | 0,11028417  | 00:07:31 | 0.027696633 | 0,110790281 |
| 00:07:22 | 0.028116357 | 0,110295425 | 00:07:31 | 0.027687436 | 0,110801061 |
| 00:07:22 | 0.028105669 | 0,110306165 | 00:07:31 | 0.027677319 | 0,110812065 |
| 00:07:22 | 0.028096105 | 0,110316499 | 00:07:31 | 0.027667678 | 0,110823109 |
| 00:07:22 | 0.028086843 | 0,110328141 | 00:07:31 | 0.027658492 | 0,110834152 |
| 00:07:23 | 0.028077799 | 0,110339411 | 00:07:32 | 0.027647435 | 0,1108451   |
| 00:07:23 | 0.02806852  | 0,110350809 | 00:07:32 | 0.02763724  | 0,110856201 |
| 00:07:23 | 0.028058325 | 0,11036192  | 00:07:32 | 0.02762743  | 0,110867567 |
| 00:07:23 | 0.028048388 | 0,110373689 | 00:07:32 | 0.027617667 | 0,110878513 |
| 00:07:23 | 0.028038643 | 0,110385091 | 00:07:32 | 0.027607847 | 0,110889092 |
| 00:07:24 | 0.028030403 | 0,110396333 | 00:07:33 | 0.027599065 | 0,110899845 |
| 00:07:24 | 0.028021015 | 0,110408113 | 00:07:33 | 0.027590177 | 0,110910488 |
| 00:07:24 | 0.02801207  | 0,110418477 | 00:07:33 | 0.027581051 | 0,110920881 |
| 00:07:24 | 0.028002805 | 0,110428505 | 00:07:33 | 0.027572631 | 0,110931479 |
| 00:07:24 | 0.027992632 | 0,110440147 | 00:07:33 | 0.027563588 | 0,110942158 |
| 00:07:25 | 0.027982377 | 0,110451253 | 00:07:34 | 0.027553959 | 0,110952638 |
| 00:07:25 | 0.02797307  | 0,110462124 | 00:07:34 | 0.027510221 | 0,110960057 |
| 00:07:25 | 0.027963519 | 0,110473717 | 00:07:34 | 0.02745929  | 0,110966869 |
| 00:07:25 | 0.02795331  | 0,110485126 | 00:07:34 | 0.027410296 | 0,110973957 |
| 00:07:25 | 0.027945433 | 0,110495579 | 00:07:34 | 0.027361231 | 0,110980696 |
| 00:07:26 | 0.027935707 | 0,11050655  | 00:07:35 | 0.02735201  | 0,110991641 |
| 00:07:26 | 0.027926145 | 0,110517822 | 00:07:35 | 0.027341523 | 0,111002283 |
| 00:07:26 | 0.027916594 | 0,110529142 | 00:07:35 | 0.027330617 | 0,111013667 |
| 00:07:26 | 0.02790745  | 0,110540259 | 00:07:35 | 0.02731958  | 0,111024678 |
| 00:07:26 | 0.027898656 | 0,110551254 | 00:07:35 | 0.027308547 | 0,111034972 |
| 00:07:26 | 0.027889547 | 0,110562374 | 00:07:36 | 0.027297026 | 0,1110453   |
| 00:07:27 | 0.027879784 | 0,110573218 | 00:07:36 | 0.027286065 | 0,111055261 |
| 00:07:27 | 0.027871595 | 0,110584473 | 00:07:36 | 0.027276154 | 0,111066409 |
| 00:07:27 | 0.027861702 | 0,110595491 | 00:07:36 | 0.027266625 | 0,111077373 |
| 00:07:27 | 0.027852766 | 0,110606555 | 00:07:36 | 0.027257404 | 0,111088339 |

|          |             |             |          |             |             |
|----------|-------------|-------------|----------|-------------|-------------|
| 00:07:37 | 0.027247047 | 0,111098881 | 00:07:46 | 0.027002205 | 0,111591645 |
| 00:07:37 | 0.027236835 | 0,111109626 | 00:07:46 | 0.026993441 | 0,111601934 |
| 00:07:37 | 0.027226545 | 0,111120421 | 00:07:46 | 0.026984662 | 0,111611844 |
| 00:07:37 | 0.027217165 | 0,11113096  | 00:07:46 | 0.026975891 | 0,111621997 |
| 00:07:37 | 0.027207414 | 0,111141493 | 00:07:46 | 0.026967151 | 0,111631292 |
| 00:07:38 | 0.027196112 | 0,111151698 | 00:07:47 | 0.026958777 | 0,111641613 |
| 00:07:38 | 0.027233323 | 0,111166278 | 00:07:47 | 0.026949645 | 0,111652323 |
| 00:07:38 | 0.027177033 | 0,111171973 | 00:07:47 | 0.026940426 | 0,11166294  |
| 00:07:38 | 0.027167236 | 0,111183135 | 00:07:47 | 0.026931693 | 0,111672958 |
| 00:07:38 | 0.027156328 | 0,111193749 | 00:07:47 | 0.026923291 | 0,111683407 |
| 00:07:39 | 0.027194588 | 0,111208105 | 00:07:48 | 0.026914704 | 0,111693985 |
| 00:07:39 | 0.027215507 | 0,111221512 | 00:07:48 | 0.026905446 | 0,111703593 |
| 00:07:39 | 0.027172523 | 0,111228782 | 00:07:48 | 0.026896612 | 0,111713684 |
| 00:07:39 | 0.027257674 | 0,111247912 | 00:07:48 | 0.026887671 | 0,111723967 |
| 00:07:39 | 0.027209339 | 0,111254877 | 00:07:48 | 0.026878823 | 0,111734456 |
| 00:07:40 | 0.027280213 | 0,111272366 | 00:07:49 | 0.026868636 | 0,111744484 |
| 00:07:40 | 0.027271843 | 0,111282626 | 00:07:49 | 0.026771642 | 0,111746216 |
| 00:07:40 | 0.027262744 | 0,111293202 | 00:07:49 | 0.026756508 | 0,111755693 |
| 00:07:40 | 0.027248988 | 0,111303555 | 00:07:49 | 0.026841247 | 0,111774358 |
| 00:07:40 | 0.027244227 | 0,111314742 | 00:07:49 | 0.026835739 | 0,111784664 |
| 00:07:41 | 0.027206437 | 0,111322466 | 00:07:50 | 0.026826875 | 0,111795182 |
| 00:07:41 | 0.027226358 | 0,111335903 | 00:07:50 | 0.02681844  | 0,111804605 |
| 00:07:41 | 0.0272182   | 0,111347251 | 00:07:50 | 0.026809341 | 0,111814388 |
| 00:07:41 | 0.027209272 | 0,111357708 | 00:07:50 | 0.026801468 | 0,111824208 |
| 00:07:41 | 0.027200193 | 0,111367894 | 00:07:50 | 0.026793085 | 0,111834349 |
| 00:07:42 | 0.027190827 | 0,111377941 | 00:07:51 | 0.026783915 | 0,111844516 |
| 00:07:42 | 0.027181794 | 0,11138818  | 00:07:51 | 0.026775363 | 0,111854352 |
| 00:07:42 | 0.027173341 | 0,111398771 | 00:07:51 | 0.026767285 | 0,11186455  |
| 00:07:42 | 0.027112983 | 0,111403671 | 00:07:51 | 0.02675816  | 0,111874261 |
| 00:07:42 | 0.026979519 | 0,111401304 | 00:07:51 | 0.026728482 | 0,111882174 |
| 00:07:42 | 0.026963194 | 0,111411119 | 00:07:52 | 0.026689039 | 0,111888711 |
| 00:07:43 | 0.026977308 | 0,111423469 | 00:07:52 | 0.026672142 | 0,111897581 |
| 00:07:43 | 0.026950078 | 0,111432005 | 00:07:52 | 0.026628904 | 0,111903515 |
| 00:07:43 | 0.026940745 | 0,11144209  | 00:07:52 | 0.026623021 | 0,11191412  |
| 00:07:43 | 0.026935028 | 0,111452026 | 00:07:52 | 0.026615833 | 0,111924387 |
| 00:07:43 | 0.026960851 | 0,111465693 | 00:07:53 | 0.026606722 | 0,111934828 |
| 00:07:44 | 0.027035534 | 0,111483626 | 00:07:53 | 0.026600728 | 0,111944853 |
| 00:07:44 | 0.027083495 | 0,111498747 | 00:07:53 | 0.026595444 | 0,111954907 |
| 00:07:44 | 0.027074635 | 0,111509195 | 00:07:53 | 0.026587533 | 0,111964943 |
| 00:07:44 | 0.027065403 | 0,111519312 | 00:07:53 | 0.026590418 | 0,111975351 |
| 00:07:45 | 0.027055939 | 0,111529562 | 00:07:54 | 0.026571299 | 0,111984397 |
| 00:07:45 | 0.027046691 | 0,111539492 | 00:07:54 | 0.026564523 | 0,111994768 |
| 00:07:45 | 0.027037821 | 0,111549784 | 00:07:54 | 0.026559077 | 0,11200484  |
| 00:07:45 | 0.027028751 | 0,111560734 | 00:07:54 | 0.026552522 | 0,112015277 |
| 00:07:45 | 0.027021103 | 0,111571313 | 00:07:54 | 0.026545342 | 0,112026049 |
| 00:07:45 | 0.027011664 | 0,111581688 | 00:07:55 | 0.026539247 | 0,112036384 |

|          |             |             |          |             |             |
|----------|-------------|-------------|----------|-------------|-------------|
| 00:07:55 | 0.02653419  | 0,112046967 | 00:08:04 | 0.026215349 | 0,11249707  |
| 00:07:55 | 0.026525436 | 0,112056695 | 00:08:04 | 0.026206452 | 0,112506363 |
| 00:07:55 | 0.026518657 | 0,11206628  | 00:08:04 | 0.026198336 | 0,112515629 |
| 00:07:55 | 0.026510521 | 0,112076172 | 00:08:04 | 0.026190164 | 0,112525143 |
| 00:07:56 | 0.026500945 | 0,112085822 | 00:08:05 | 0.026182246 | 0,112534446 |
| 00:07:56 | 0.026494044 | 0,112096345 | 00:08:05 | 0.026173777 | 0,112544005 |
| 00:07:56 | 0.026487949 | 0,112105382 | 00:08:05 | 0.026166146 | 0,112554288 |
| 00:07:56 | 0.026483205 | 0,112115573 | 00:08:05 | 0.026158115 | 0,112563752 |
| 00:07:56 | 0.026476662 | 0,112126061 | 00:08:05 | 0.026149573 | 0,112572993 |
| 00:07:57 | 0.026470578 | 0,112136247 | 00:08:06 | 0.026140755 | 0,112582297 |
| 00:07:57 | 0.026465405 | 0,112146571 | 00:08:06 | 0.02613209  | 0,112591896 |
| 00:07:57 | 0.026458637 | 0,112156321 | 00:08:06 | 0.026123583 | 0,112601346 |
| 00:07:57 | 0.026451401 | 0,11216596  | 00:08:06 | 0.026114688 | 0,112610666 |
| 00:07:57 | 0.026443412 | 0,112175866 | 00:08:06 | 0.026106088 | 0,112620086 |
| 00:07:58 | 0.026435633 | 0,11218524  | 00:08:07 | 0.026097566 | 0,112629093 |
| 00:07:58 | 0.026427545 | 0,11219481  | 00:08:07 | 0.026088775 | 0,112638434 |
| 00:07:58 | 0.026420115 | 0,112204333 | 00:08:07 | 0.026080918 | 0,112647693 |
| 00:07:58 | 0.026413979 | 0,112214342 | 00:08:07 | 0.026072738 | 0,112656833 |
| 00:07:58 | 0.026407441 | 0,112224493 | 00:08:07 | 0.026064644 | 0,112665718 |
| 00:07:59 | 0.026399514 | 0,112234417 | 00:08:08 | 0.026056725 | 0,11267564  |
| 00:07:59 | 0.026392108 | 0,112244346 | 00:08:08 | 0.026048367 | 0,112685332 |
| 00:07:59 | 0.026387156 | 0,112253887 | 00:08:08 | 0.026038964 | 0,1126945   |
| 00:07:59 | 0.026379636 | 0,112263172 | 00:08:08 | 0.026031244 | 0,112704246 |
| 00:07:59 | 0.026373806 | 0,112273121 | 00:08:08 | 0.026022728 | 0,112714105 |
| 00:08:00 | 0.026366836 | 0,112282747 | 00:08:09 | 0.02601448  | 0,112723484 |
| 00:08:00 | 0.026358681 | 0,112292628 | 00:08:09 | 0.02600651  | 0,112732286 |
| 00:08:00 | 0.026350021 | 0,112302301 | 00:08:09 | 0.02599801  | 0,112741389 |
| 00:08:00 | 0.026343658 | 0,11231183  | 00:08:09 | 0.025989936 | 0,112750644 |
| 00:08:00 | 0.026337158 | 0,112321858 | 00:08:09 | 0.025981163 | 0,112759691 |
| 00:08:00 | 0.026329846 | 0,112332023 | 00:08:10 | 0.025973357 | 0,112768552 |
| 00:08:01 | 0.026323036 | 0,112341997 | 00:08:10 | 0.025965138 | 0,112778432 |
| 00:08:01 | 0.02631587  | 0,112352095 | 00:08:10 | 0.025956089 | 0,112788594 |
| 00:08:01 | 0.026310118 | 0,112362647 | 00:08:10 | 0.025947997 | 0,112797782 |
| 00:08:01 | 0.026304041 | 0,112372224 | 00:08:10 | 0.025940738 | 0,112807176 |
| 00:08:02 | 0.026298145 | 0,112382481 | 00:08:11 | 0.025932456 | 0,11281601  |
| 00:08:02 | 0.026291424 | 0,11239285  | 00:08:11 | 0.025924652 | 0,112825493 |
| 00:08:02 | 0.026283839 | 0,112402521 | 00:08:11 | 0.025915943 | 0,112834291 |
| 00:08:02 | 0.026277217 | 0,112411513 | 00:08:11 | 0.025907593 | 0,112843996 |
| 00:08:02 | 0.026270389 | 0,112420648 | 00:08:11 | 0.025899174 | 0,112853286 |
| 00:08:02 | 0.026262332 | 0,112429738 | 00:08:12 | 0.025890809 | 0,11286233  |
| 00:08:03 | 0.026256864 | 0,112439744 | 00:08:12 | 0.025883236 | 0,112871331 |
| 00:08:03 | 0.026249741 | 0,112449351 | 00:08:12 | 0.02587484  | 0,112880581 |
| 00:08:03 | 0.026244914 | 0,11245945  | 00:08:12 | 0.025867198 | 0,112890016 |
| 00:08:03 | 0.026239628 | 0,112468588 | 00:08:12 | 0.025859135 | 0,112899147 |
| 00:08:03 | 0.026231896 | 0,112478099 | 00:08:13 | 0.025851614 | 0,112908947 |
| 00:08:04 | 0.026223581 | 0,112487732 | 00:08:13 | 0.025844857 | 0,112918631 |

|          |             |             |          |             |             |
|----------|-------------|-------------|----------|-------------|-------------|
| 00:08:13 | 0.025837049 | 0,112927462 | 00:08:22 | 0.025476776 | 0,113345373 |
| 00:08:13 | 0.025828583 | 0,112937016 | 00:08:22 | 0.025469087 | 0,113354632 |
| 00:08:13 | 0.025820116 | 0,11294616  | 00:08:23 | 0.025460789 | 0,113363132 |
| 00:08:14 | 0.025811598 | 0,112955413 | 00:08:23 | 0.025453294 | 0,113372527 |
| 00:08:14 | 0.025803949 | 0,112964453 | 00:08:23 | 0.025445925 | 0,11338217  |
| 00:08:14 | 0.025796414 | 0,112973651 | 00:08:23 | 0.025438046 | 0,113390881 |
| 00:08:14 | 0.025789331 | 0,112983453 | 00:08:23 | 0.025430818 | 0,113399307 |
| 00:08:14 | 0.025781481 | 0,112992214 | 00:08:23 | 0.025423022 | 0,113407536 |
| 00:08:15 | 0.025773778 | 0,11300101  | 00:08:24 | 0.025416108 | 0,113416134 |
| 00:08:15 | 0.025765807 | 0,11301078  | 00:08:24 | 0.02540854  | 0,113425353 |
| 00:08:15 | 0.025756928 | 0,113020138 | 00:08:24 | 0.025401334 | 0,113433714 |
| 00:08:15 | 0.025749196 | 0,113029276 | 00:08:24 | 0.025393006 | 0,113443256 |
| 00:08:15 | 0.025741359 | 0,113038404 | 00:08:24 | 0.025385875 | 0,113451704 |
| 00:08:16 | 0.025733233 | 0,113047775 | 00:08:25 | 0.025378266 | 0,113460147 |
| 00:08:16 | 0.025725731 | 0,113056828 | 00:08:25 | 0.02537081  | 0,113468794 |
| 00:08:16 | 0.025718174 | 0,113066319 | 00:08:25 | 0.025363132 | 0,113477808 |
| 00:08:16 | 0.025709396 | 0,113075836 | 00:08:25 | 0.025355242 | 0,113487089 |
| 00:08:16 | 0.025701845 | 0,113084918 | 00:08:25 | 0.025346976 | 0,113495955 |
| 00:08:17 | 0.025694125 | 0,113094384 | 00:08:26 | 0.025339248 | 0,113504844 |
| 00:08:17 | 0.025686152 | 0,113103604 | 00:08:26 | 0.025332101 | 0,113513343 |
| 00:08:17 | 0.02567843  | 0,113112388 | 00:08:26 | 0.025324493 | 0,113522374 |
| 00:08:17 | 0.025670258 | 0,113120844 | 00:08:26 | 0.025316651 | 0,113531049 |
| 00:08:17 | 0.025661768 | 0,113130145 | 00:08:26 | 0.025310287 | 0,11354033  |
| 00:08:18 | 0.02565477  | 0,113139628 | 00:08:27 | 0.02530326  | 0,113549551 |
| 00:08:18 | 0.025646785 | 0,113148219 | 00:08:27 | 0.025294848 | 0,113558081 |
| 00:08:18 | 0.025639181 | 0,113157135 | 00:08:27 | 0.025287078 | 0,113566435 |
| 00:08:18 | 0.025631132 | 0,113165959 | 00:08:27 | 0.025279802 | 0,113575257 |
| 00:08:18 | 0.025623445 | 0,113174875 | 00:08:27 | 0.025272317 | 0,113584454 |
| 00:08:18 | 0.025616496 | 0,113184148 | 00:08:28 | 0.025264792 | 0,113593355 |
| 00:08:19 | 0.025609115 | 0,113192834 | 00:08:28 | 0.025256885 | 0,11360178  |
| 00:08:19 | 0.025600987 | 0,113202016 | 00:08:28 | 0.025249466 | 0,113610489 |
| 00:08:19 | 0.025593766 | 0,113210866 | 00:08:28 | 0.025242042 | 0,1136189   |
| 00:08:19 | 0.02558551  | 0,113219257 | 00:08:28 | 0.025234724 | 0,113627824 |
| 00:08:19 | 0.025578263 | 0,113227938 | 00:08:29 | 0.025227527 | 0,113636908 |
| 00:08:20 | 0.025569826 | 0,113237191 | 00:08:29 | 0.025219382 | 0,11364592  |
| 00:08:20 | 0.025562202 | 0,113245998 | 00:08:29 | 0.025211871 | 0,113654128 |
| 00:08:20 | 0.025554364 | 0,113254671 | 00:08:29 | 0.025204793 | 0,11366332  |
| 00:08:20 | 0.025546815 | 0,113263411 | 00:08:29 | 0.025197506 | 0,11367233  |
| 00:08:21 | 0.02553886  | 0,113272356 | 00:08:30 | 0.025190361 | 0,113680421 |
| 00:08:21 | 0.025531523 | 0,113281562 | 00:08:30 | 0.025183509 | 0,113688289 |
| 00:08:21 | 0.025522874 | 0,113290214 | 00:08:30 | 0.025175721 | 0,113697784 |
| 00:08:21 | 0.025515595 | 0,113299312 | 00:08:30 | 0.025169333 | 0,113705546 |
| 00:08:21 | 0.025508083 | 0,113308799 | 00:08:30 | 0.025161804 | 0,113713981 |
| 00:08:21 | 0.025500574 | 0,113318136 | 00:08:31 | 0.025153683 | 0,113722304 |
| 00:08:22 | 0.025492845 | 0,113327169 | 00:08:31 | 0.025146422 | 0,113731012 |
| 00:08:22 | 0.025484012 | 0,11333576  | 00:08:31 | 0.02513919  | 0,113740079 |

|          |             |             |          |             |             |
|----------|-------------|-------------|----------|-------------|-------------|
| 00:08:31 | 0.025132135 | 0,113748488 | 00:08:40 | 0.024795115 | 0,114138339 |
| 00:08:31 | 0.025125106 | 0,113757115 | 00:08:40 | 0.024788141 | 0,114146494 |
| 00:08:32 | 0.025117131 | 0,113765453 | 00:08:41 | 0.024781449 | 0,114155147 |
| 00:08:32 | 0.025109976 | 0,113773953 | 00:08:41 | 0.024774727 | 0,114163453 |
| 00:08:32 | 0.025102008 | 0,113782273 | 00:08:41 | 0.024768    | 0,114171955 |
| 00:08:32 | 0.025094934 | 0,113790469 | 00:08:41 | 0.024760673 | 0,11418075  |
| 00:08:32 | 0.025088022 | 0,113798975 | 00:08:41 | 0.02475355  | 0,114189434 |
| 00:08:33 | 0.025079969 | 0,113807508 | 00:08:42 | 0.024746589 | 0,114197812 |
| 00:08:33 | 0.025071621 | 0,113815801 | 00:08:42 | 0.024740163 | 0,114206681 |
| 00:08:33 | 0.02506374  | 0,113823718 | 00:08:42 | 0.0247322   | 0,114215326 |
| 00:08:33 | 0.025055942 | 0,113832245 | 00:08:42 | 0.024725326 | 0,114223607 |
| 00:08:33 | 0.025048227 | 0,113841061 | 00:08:42 | 0.024718151 | 0,114231946 |
| 00:08:33 | 0.025040655 | 0,113849823 | 00:08:43 | 0.024711523 | 0,114240363 |
| 00:08:34 | 0.02503257  | 0,113858708 | 00:08:43 | 0.024704229 | 0,114248197 |
| 00:08:34 | 0.025025262 | 0,113867451 | 00:08:43 | 0.024696419 | 0,114256735 |
| 00:08:34 | 0.025017847 | 0,113875658 | 00:08:43 | 0.024689312 | 0,114265705 |
| 00:08:34 | 0.025010723 | 0,113884637 | 00:08:43 | 0.02468127  | 0,114274805 |
| 00:08:34 | 0.025003129 | 0,113892907 | 00:08:44 | 0.024673914 | 0,114282987 |
| 00:08:35 | 0.024996077 | 0,113901788 | 00:08:44 | 0.024667726 | 0,114291151 |
| 00:08:35 | 0.024988376 | 0,113909804 | 00:08:44 | 0.0246609   | 0,114299717 |
| 00:08:35 | 0.024981293 | 0,113918219 | 00:08:44 | 0.024653779 | 0,114308083 |
| 00:08:35 | 0.024975147 | 0,113927225 | 00:08:44 | 0.024646675 | 0,114315854 |
| 00:08:36 | 0.024967724 | 0,113935695 | 00:08:45 | 0.024639118 | 0,114324313 |
| 00:08:36 | 0.024960852 | 0,113944584 | 00:08:45 | 0.02463271  | 0,114332445 |
| 00:08:36 | 0.024953793 | 0,113952881 | 00:08:45 | 0.024625916 | 0,114340556 |
| 00:08:36 | 0.024946828 | 0,113961827 | 00:08:45 | 0.024618959 | 0,11434883  |
| 00:08:36 | 0.024939876 | 0,11397071  | 00:08:45 | 0.024611541 | 0,114356896 |
| 00:08:36 | 0.024932704 | 0,113978917 | 00:08:46 | 0.024605167 | 0,114365434 |
| 00:08:37 | 0.024925093 | 0,113987189 | 00:08:46 | 0.02459737  | 0,114373848 |
| 00:08:37 | 0.024917721 | 0,113995512 | 00:08:46 | 0.024590512 | 0,114382502 |
| 00:08:37 | 0.024910073 | 0,114003885 | 00:08:46 | 0.024583306 | 0,114390418 |
| 00:08:37 | 0.024902708 | 0,114012664 | 00:08:46 | 0.024575605 | 0,114398537 |
| 00:08:38 | 0.024895583 | 0,114021451 | 00:08:47 | 0.024568095 | 0,114406909 |
| 00:08:38 | 0.024889053 | 0,114029265 | 00:08:47 | 0.024560931 | 0,1144154   |
| 00:08:38 | 0.024882399 | 0,114037715 | 00:08:47 | 0.02455418  | 0,114423283 |
| 00:08:38 | 0.024875004 | 0,114046205 | 00:08:47 | 0.024547345 | 0,114431234 |
| 00:08:38 | 0.024868285 | 0,114054617 | 00:08:47 | 0.024540148 | 0,114438984 |
| 00:08:38 | 0.024861454 | 0,114062898 | 00:08:48 | 0.024533049 | 0,114446706 |
| 00:08:39 | 0.024854711 | 0,114071445 | 00:08:48 | 0.024526795 | 0,114454789 |
| 00:08:39 | 0.024847361 | 0,114079938 | 00:08:48 | 0.024520385 | 0,114462947 |
| 00:08:39 | 0.024840353 | 0,114088342 | 00:08:48 | 0.024512589 | 0,114470504 |
| 00:08:39 | 0.024832974 | 0,114097    | 00:08:48 | 0.024505306 | 0,114478554 |
| 00:08:39 | 0.024824906 | 0,114105273 | 00:08:49 | 0.024498045 | 0,114486212 |
| 00:08:40 | 0.024818135 | 0,114113352 | 00:08:49 | 0.024491194 | 0,114494554 |
| 00:08:40 | 0.024809783 | 0,114121716 | 00:08:49 | 0.024484349 | 0,114502839 |
| 00:08:40 | 0.024802695 | 0,11412974  | 00:08:49 | 0.024477407 | 0,114511009 |

|          |             |             |          |             |             |
|----------|-------------|-------------|----------|-------------|-------------|
| 00:08:49 | 0.024470681 | 0,114518241 | 00:08:58 | 0.024157854 | 0,11488547  |
| 00:08:50 | 0.02446375  | 0,114525795 | 00:08:59 | 0.024151274 | 0,114893394 |
| 00:08:50 | 0.024457032 | 0,114533957 | 00:08:59 | 0.024144841 | 0,114901725 |
| 00:08:50 | 0.024450602 | 0,1145421   | 00:08:59 | 0.024138221 | 0,114909269 |
| 00:08:50 | 0.02444451  | 0,114550135 | 00:08:59 | 0.024130994 | 0,114916773 |
| 00:08:50 | 0.024437362 | 0,114558241 | 00:08:59 | 0.024124225 | 0,11492435  |
| 00:08:51 | 0.024429779 | 0,114566462 | 00:09:00 | 0.024117236 | 0,114932269 |
| 00:08:51 | 0.024423495 | 0,114574035 | 00:09:00 | 0.024110405 | 0,114940211 |
| 00:08:51 | 0.024416433 | 0,114582087 | 00:09:00 | 0.024104073 | 0,114948226 |
| 00:08:51 | 0.024409559 | 0,114590141 | 00:09:00 | 0.024097284 | 0,114955515 |
| 00:08:51 | 0.024402208 | 0,114598396 | 00:09:00 | 0.024090756 | 0,114963248 |
| 00:08:52 | 0.024394884 | 0,114606229 | 00:09:01 | 0.024084302 | 0,114971454 |
| 00:08:52 | 0.024387918 | 0,114614351 | 00:09:01 | 0.024077361 | 0,114979333 |
| 00:08:52 | 0.024382181 | 0,114622401 | 00:09:01 | 0.02407085  | 0,114986968 |
| 00:08:52 | 0.024375716 | 0,114630849 | 00:09:01 | 0.024064236 | 0,114994699 |
| 00:08:52 | 0.024368697 | 0,114638848 | 00:09:01 | 0.024057419 | 0,115002505 |
| 00:08:52 | 0.024361316 | 0,114647172 | 00:09:02 | 0.024050731 | 0,115010358 |
| 00:08:53 | 0.024354595 | 0,114655459 | 00:09:02 | 0.024043999 | 0,115017568 |
| 00:08:53 | 0.024348119 | 0,114663406 | 00:09:02 | 0.024038122 | 0,115025351 |
| 00:08:53 | 0.024341253 | 0,114671798 | 00:09:02 | 0.024031446 | 0,115033269 |
| 00:08:53 | 0.024334857 | 0,114679578 | 00:09:02 | 0.024024993 | 0,115040477 |
| 00:08:53 | 0.024327433 | 0,114687549 | 00:09:03 | 0.024018309 | 0,115048183 |
| 00:08:54 | 0.024320097 | 0,11469553  | 00:09:03 | 0.024011354 | 0,115056179 |
| 00:08:54 | 0.0243132   | 0,114703443 | 00:09:03 | 0.024005054 | 0,115063791 |
| 00:08:54 | 0.024306379 | 0,114711435 | 00:09:03 | 0.023999164 | 0,115071504 |
| 00:08:54 | 0.024299129 | 0,114719334 | 00:09:03 | 0.023992407 | 0,115079294 |
| 00:08:54 | 0.024292988 | 0,11472703  | 00:09:04 | 0.023985482 | 0,115086829 |
| 00:08:55 | 0.024286111 | 0,114735344 | 00:09:04 | 0.023977996 | 0,115094667 |
| 00:08:55 | 0.024278963 | 0,114742835 | 00:09:04 | 0.023972018 | 0,115103083 |
| 00:08:55 | 0.024272572 | 0,114750459 | 00:09:04 | 0.023965642 | 0,115111086 |
| 00:08:55 | 0.024265788 | 0,114757981 | 00:09:04 | 0.023958783 | 0,115118842 |
| 00:08:55 | 0.024259022 | 0,114766092 | 00:09:05 | 0.023952061 | 0,11512631  |
| 00:08:56 | 0.024252074 | 0,114773802 | 00:09:05 | 0.023945651 | 0,115134039 |
| 00:08:56 | 0.024246649 | 0,114781326 | 00:09:05 | 0.023939288 | 0,115141802 |
| 00:08:56 | 0.024239625 | 0,114789264 | 00:09:05 | 0.023933343 | 0,115149799 |
| 00:08:56 | 0.024233239 | 0,114797328 | 00:09:05 | 0.02392673  | 0,115156592 |
| 00:08:56 | 0.024225937 | 0,114805635 | 00:09:06 | 0.023919899 | 0,115164349 |
| 00:08:57 | 0.024219723 | 0,114813834 | 00:09:06 | 0.023913517 | 0,115172301 |
| 00:08:57 | 0.02421301  | 0,114821752 | 00:09:06 | 0.0239077   | 0,115180527 |
| 00:08:57 | 0.024206037 | 0,114829702 | 00:09:06 | 0.023900848 | 0,115188458 |
| 00:08:57 | 0.024199696 | 0,114837962 | 00:09:06 | 0.023894216 | 0,11519599  |
| 00:08:57 | 0.024192889 | 0,114845788 | 00:09:07 | 0.023888249 | 0,115204186 |
| 00:08:58 | 0.024186134 | 0,114853384 | 00:09:07 | 0.023881544 | 0,115211917 |
| 00:08:58 | 0.02417981  | 0,114861672 | 00:09:07 | 0.023875461 | 0,115219112 |
| 00:08:58 | 0.024172455 | 0,114869921 | 00:09:07 | 0.023869089 | 0,115227187 |
| 00:08:58 | 0.024164765 | 0,114877872 | 00:09:07 | 0.023862909 | 0,115235423 |

|          |             |             |          |             |             |
|----------|-------------|-------------|----------|-------------|-------------|
| 00:09:08 | 0.023856398 | 0,115243031 | 00:09:17 | 0.023566179 | 0,115586144 |
| 00:09:08 | 0.023849224 | 0,115250341 | 00:09:17 | 0.023559866 | 0,115593695 |
| 00:09:08 | 0.023842339 | 0,115257575 | 00:09:17 | 0.023554092 | 0,115601506 |
| 00:09:08 | 0.023836585 | 0,115265736 | 00:09:17 | 0.023547727 | 0,115608624 |
| 00:09:08 | 0.023830595 | 0,115273192 | 00:09:17 | 0.023541535 | 0,115616416 |
| 00:09:09 | 0.023824223 | 0,115280549 | 00:09:18 | 0.023535623 | 0,115623628 |
| 00:09:09 | 0.023818233 | 0,115287713 | 00:09:18 | 0.023529614 | 0,115631135 |
| 00:09:09 | 0.023811813 | 0,11529521  | 00:09:18 | 0.023522762 | 0,115638141 |
| 00:09:09 | 0.023806004 | 0,115302635 | 00:09:18 | 0.023516336 | 0,115645914 |
| 00:09:09 | 0.023799142 | 0,115310358 | 00:09:18 | 0.023510636 | 0,11565365  |
| 00:09:10 | 0.023792115 | 0,115317983 | 00:09:19 | 0.023504948 | 0,115660926 |
| 00:09:10 | 0.023785797 | 0,115325654 | 00:09:19 | 0.02349859  | 0,115668412 |
| 00:09:10 | 0.023779575 | 0,11533321  | 00:09:19 | 0.023492516 | 0,115675418 |
| 00:09:10 | 0.023773858 | 0,115340687 | 00:09:19 | 0.023486743 | 0,115682549 |
| 00:09:10 | 0.023767569 | 0,115347969 | 00:09:19 | 0.023480791 | 0,115689489 |
| 00:09:11 | 0.023761885 | 0,115355268 | 00:09:20 | 0.023474399 | 0,115697115 |
| 00:09:11 | 0.023754791 | 0,115362651 | 00:09:20 | 0.023467578 | 0,115704365 |
| 00:09:11 | 0.023747695 | 0,115370632 | 00:09:20 | 0.023461954 | 0,115712206 |
| 00:09:11 | 0.023740662 | 0,115378697 | 00:09:20 | 0.02345541  | 0,115719376 |
| 00:09:11 | 0.023734102 | 0,115386534 | 00:09:20 | 0.023449043 | 0,11572661  |
| 00:09:12 | 0.023727976 | 0,115394449 | 00:09:21 | 0.0234432   | 0,115733854 |
| 00:09:12 | 0.023721706 | 0,115401924 | 00:09:21 | 0.02343748  | 0,115740969 |
| 00:09:12 | 0.023715644 | 0,115409441 | 00:09:21 | 0.023431572 | 0,115748298 |
| 00:09:12 | 0.023709229 | 0,115416929 | 00:09:21 | 0.02342493  | 0,115755563 |
| 00:09:12 | 0.02370317  | 0,115424283 | 00:09:21 | 0.023418156 | 0,115762031 |
| 00:09:13 | 0.023697657 | 0,115431967 | 00:09:22 | 0.023412582 | 0,115768999 |
| 00:09:13 | 0.023691271 | 0,115439617 | 00:09:22 | 0.023406611 | 0,115776389 |
| 00:09:13 | 0.023685062 | 0,115447029 | 00:09:22 | 0.023401004 | 0,115783652 |
| 00:09:13 | 0.023678621 | 0,115454553 | 00:09:22 | 0.023394593 | 0,115790423 |
| 00:09:13 | 0.023673174 | 0,115461734 | 00:09:22 | 0.023389041 | 0,115797697 |
| 00:09:13 | 0.02366739  | 0,115468949 | 00:09:23 | 0.023383399 | 0,115804772 |
| 00:09:14 | 0.023661208 | 0,115475719 | 00:09:23 | 0.023376694 | 0,115812717 |
| 00:09:14 | 0.023655414 | 0,115482772 | 00:09:23 | 0.023371104 | 0,115820686 |
| 00:09:14 | 0.023648824 | 0,115490295 | 00:09:23 | 0.023365022 | 0,115827646 |
| 00:09:14 | 0.023642254 | 0,115498012 | 00:09:23 | 0.023359465 | 0,115835565 |
| 00:09:14 | 0.023635913 | 0,115506009 | 00:09:24 | 0.023354392 | 0,115842439 |
| 00:09:15 | 0.023629484 | 0,115513779 | 00:09:24 | 0.023348094 | 0,115849176 |
| 00:09:15 | 0.02362259  | 0,115521042 | 00:09:24 | 0.023341317 | 0,11585658  |
| 00:09:15 | 0.023615825 | 0,115528642 | 00:09:24 | 0.02333451  | 0,115863712 |
| 00:09:15 | 0.023609645 | 0,115535744 | 00:09:24 | 0.023329081 | 0,115871143 |
| 00:09:15 | 0.023602806 | 0,115542943 | 00:09:25 | 0.023323212 | 0,11587836  |
| 00:09:16 | 0.023596579 | 0,115549397 | 00:09:25 | 0.023317639 | 0,115885385 |
| 00:09:16 | 0.023590444 | 0,115556439 | 00:09:25 | 0.023312115 | 0,115892406 |
| 00:09:16 | 0.023584636 | 0,115563932 | 00:09:25 | 0.023306479 | 0,115899003 |
| 00:09:16 | 0.023578661 | 0,115571737 | 00:09:25 | 0.023300336 | 0,115906435 |
| 00:09:16 | 0.023572512 | 0,115578675 | 00:09:26 | 0.023293652 | 0,115913529 |

|          |             |             |          |             |             |
|----------|-------------|-------------|----------|-------------|-------------|
| 00:09:26 | 0.023287516 | 0,115920193 | 00:09:35 | 0.023015722 | 0,116241586 |
| 00:09:26 | 0.023281304 | 0,115927214 | 00:09:35 | 0.023009631 | 0,116248234 |
| 00:09:26 | 0.023275211 | 0,115934222 | 00:09:35 | 0.023003443 | 0,11625491  |
| 00:09:26 | 0.023269108 | 0,115941325 | 00:09:35 | 0.022997241 | 0,116262162 |
| 00:09:27 | 0.023263823 | 0,115948378 | 00:09:36 | 0.022991424 | 0,116269008 |
| 00:09:27 | 0.023257392 | 0,11595553  | 00:09:36 | 0.022985159 | 0,116276158 |
| 00:09:27 | 0.023251605 | 0,11596194  | 00:09:36 | 0.022978429 | 0,116283018 |
| 00:09:27 | 0.023245453 | 0,115968573 | 00:09:36 | 0.022972952 | 0,116290447 |
| 00:09:27 | 0.023239425 | 0,115975579 | 00:09:36 | 0.022967278 | 0,116297296 |
| 00:09:28 | 0.023234104 | 0,115982823 | 00:09:37 | 0.022961495 | 0,116304184 |
| 00:09:28 | 0.023227509 | 0,115990151 | 00:09:37 | 0.022956221 | 0,116311437 |
| 00:09:28 | 0.023221385 | 0,115997649 | 00:09:37 | 0.022950647 | 0,116318408 |
| 00:09:28 | 0.023215031 | 0,116004559 | 00:09:37 | 0.022945316 | 0,116325083 |
| 00:09:28 | 0.023208617 | 0,11601137  | 00:09:37 | 0.022940006 | 0,116332189 |
| 00:09:28 | 0.023202989 | 0,116017706 | 00:09:38 | 0.022934177 | 0,116339019 |
| 00:09:29 | 0.023196752 | 0,116025482 | 00:09:38 | 0.022928284 | 0,116346208 |
| 00:09:29 | 0.023191193 | 0,116033076 | 00:09:38 | 0.022923314 | 0,116352711 |
| 00:09:29 | 0.023185926 | 0,116040208 | 00:09:38 | 0.022917275 | 0,116359567 |
| 00:09:29 | 0.023179524 | 0,116047135 | 00:09:38 | 0.022911968 | 0,116366805 |
| 00:09:29 | 0.023173221 | 0,116054    | 00:09:39 | 0.022905825 | 0,116373081 |
| 00:09:30 | 0.023167167 | 0,116061184 | 00:09:39 | 0.022899777 | 0,116380304 |
| 00:09:30 | 0.023160646 | 0,116067817 | 00:09:39 | 0.022893758 | 0,116386643 |
| 00:09:30 | 0.023154806 | 0,116074759 | 00:09:39 | 0.022888448 | 0,116393062 |
| 00:09:30 | 0.023149522 | 0,116082113 | 00:09:39 | 0.022882719 | 0,116399656 |
| 00:09:31 | 0.023144069 | 0,116089499 | 00:09:40 | 0.022876772 | 0,116406525 |
| 00:09:31 | 0.023137917 | 0,116096528 | 00:09:40 | 0.022870807 | 0,11641343  |
| 00:09:31 | 0.023132078 | 0,116103673 | 00:09:40 | 0.022865394 | 0,11642034  |
| 00:09:31 | 0.023126007 | 0,11611043  | 00:09:40 | 0.022859754 | 0,116427537 |
| 00:09:31 | 0.023120174 | 0,116116805 | 00:09:40 | 0.022853939 | 0,116434329 |
| 00:09:31 | 0.023114256 | 0,116123551 | 00:09:41 | 0.022848102 | 0,116441279 |
| 00:09:32 | 0.023108702 | 0,116130556 | 00:09:41 | 0.022842275 | 0,116447827 |
| 00:09:32 | 0.023102786 | 0,116137281 | 00:09:41 | 0.022836006 | 0,116454577 |
| 00:09:32 | 0.023097049 | 0,116143906 | 00:09:41 | 0.022830828 | 0,116461426 |
| 00:09:32 | 0.023091044 | 0,116150687 | 00:09:41 | 0.022825336 | 0,116467815 |
| 00:09:32 | 0.023085682 | 0,116157515 | 00:09:42 | 0.022818577 | 0,116474911 |
| 00:09:33 | 0.023079294 | 0,116165027 | 00:09:42 | 0.022813292 | 0,116481465 |
| 00:09:33 | 0.02307383  | 0,116171877 | 00:09:42 | 0.022807577 | 0,116488479 |
| 00:09:33 | 0.023067727 | 0,116178617 | 00:09:42 | 0.022801887 | 0,116494981 |
| 00:09:33 | 0.023062369 | 0,116185523 | 00:09:42 | 0.022796184 | 0,116501653 |
| 00:09:33 | 0.023056226 | 0,116192681 | 00:09:43 | 0.022790237 | 0,116508424 |
| 00:09:34 | 0.023050542 | 0,116200238 | 00:09:43 | 0.022784319 | 0,116515022 |
| 00:09:34 | 0.023044681 | 0,116207006 | 00:09:43 | 0.022779254 | 0,116521748 |
| 00:09:34 | 0.02303906  | 0,116214523 | 00:09:43 | 0.022774045 | 0,116528877 |
| 00:09:34 | 0.023033733 | 0,116221056 | 00:09:43 | 0.02276937  | 0,116535797 |
| 00:09:34 | 0.023027334 | 0,116227702 | 00:09:44 | 0.022762573 | 0,11654273  |
| 00:09:35 | 0.023021248 | 0,116234667 | 00:09:44 | 0.022756972 | 0,116549281 |

|          |             |             |          |             |             |
|----------|-------------|-------------|----------|-------------|-------------|
| 00:09:44 | 0.022751014 | 0,116556038 | 00:09:53 | 0.022491152 | 0,11685997  |
| 00:09:44 | 0.022745294 | 0,116562974 | 00:09:53 | 0.022485546 | 0,116866674 |
| 00:09:44 | 0.022739874 | 0,11656972  | 00:09:53 | 0.022480231 | 0,11687326  |
| 00:09:44 | 0.022734174 | 0,116576173 | 00:09:54 | 0.022475057 | 0,116879413 |
| 00:09:45 | 0.022728101 | 0,116582711 | 00:09:54 | 0.022469669 | 0,116885621 |
| 00:09:45 | 0.022722109 | 0,116588977 | 00:09:54 | 0.022464272 | 0,116891934 |
| 00:09:45 | 0.02271651  | 0,116595522 | 00:09:54 | 0.02245812  | 0,116897725 |
| 00:09:45 | 0.02271141  | 0,11660285  | 00:09:54 | 0.022452497 | 0,116904146 |
| 00:09:45 | 0.022706048 | 0,116609554 | 00:09:55 | 0.022447634 | 0,116910921 |
| 00:09:46 | 0.022700793 | 0,116616655 | 00:09:55 | 0.02244212  | 0,116917386 |
| 00:09:46 | 0.02269577  | 0,116623273 | 00:09:55 | 0.022437234 | 0,116923887 |
| 00:09:46 | 0.022689613 | 0,116630005 | 00:09:55 | 0.022431494 | 0,116930048 |
| 00:09:46 | 0.022684048 | 0,11663624  | 00:09:55 | 0.022426259 | 0,116936694 |
| 00:09:47 | 0.022677735 | 0,116642747 | 00:09:56 | 0.022420902 | 0,116942955 |
| 00:09:47 | 0.022672361 | 0,116649352 | 00:09:56 | 0.022415812 | 0,116949188 |
| 00:09:47 | 0.022666758 | 0,116656021 | 00:09:56 | 0.022410157 | 0,116955508 |
| 00:09:47 | 0.02266117  | 0,116662847 | 00:09:56 | 0.022404462 | 0,116962225 |
| 00:09:47 | 0.022654989 | 0,11666985  | 00:09:56 | 0.022399175 | 0,116968442 |
| 00:09:47 | 0.022649119 | 0,116676305 | 00:09:57 | 0.022393916 | 0,116974699 |
| 00:09:48 | 0.022643524 | 0,116683664 | 00:09:57 | 0.022388069 | 0,116981112 |
| 00:09:48 | 0.022637345 | 0,116690102 | 00:09:57 | 0.022382586 | 0,116987123 |
| 00:09:48 | 0.022632037 | 0,116696643 | 00:09:57 | 0.022377004 | 0,11699314  |
| 00:09:48 | 0.022626314 | 0,116703321 | 00:09:57 | 0.022371292 | 0,116999457 |
| 00:09:49 | 0.022620798 | 0,116710213 | 00:09:58 | 0.022365868 | 0,117005835 |
| 00:09:49 | 0.022615073 | 0,116716556 | 00:09:58 | 0.022360288 | 0,117012081 |
| 00:09:49 | 0.022608961 | 0,116722738 | 00:09:58 | 0.022355066 | 0,117018639 |
| 00:09:49 | 0.022602915 | 0,116729036 | 00:09:58 | 0.022350384 | 0,117024737 |
| 00:09:49 | 0.022597198 | 0,116735614 | 00:09:58 | 0.022344557 | 0,117031153 |
| 00:09:49 | 0.022591123 | 0,116742076 | 00:09:59 | 0.022338893 | 0,117037553 |
| 00:09:50 | 0.022585438 | 0,11674833  | 00:09:59 | 0.022333064 | 0,1170441   |
| 00:09:50 | 0.022579509 | 0,116754462 | 00:09:59 | 0.022327397 | 0,117050462 |
| 00:09:50 | 0.022573517 | 0,116761375 | 00:09:59 | 0.022321689 | 0,117056848 |
| 00:09:50 | 0.022568114 | 0,116767961 | 00:09:59 | 0.022316662 | 0,117063427 |
| 00:09:50 | 0.022562899 | 0,116774479 | 00:10:00 | 0.022311408 | 0,117069995 |
| 00:09:51 | 0.022557352 | 0,116781037 | 00:10:00 | 0.02230593  | 0,117076644 |
| 00:09:51 | 0.02255217  | 0,11678795  | 00:10:00 | 0.022300441 | 0,117082899 |
| 00:09:51 | 0.022546845 | 0,116794729 | 00:10:00 | 0.022295032 | 0,117089503 |
| 00:09:51 | 0.022540949 | 0,116801254 | 00:10:00 | 0.022290322 | 0,117095781 |
| 00:09:51 | 0.022535419 | 0,116806994 | 00:10:01 | 0.022285052 | 0,117102577 |
| 00:09:52 | 0.022529337 | 0,116813151 | 00:10:01 | 0.022279391 | 0,117108802 |
| 00:09:52 | 0.022523608 | 0,116820003 | 00:10:01 | 0.022274281 | 0,117115512 |
| 00:09:52 | 0.02251835  | 0,116826514 | 00:10:01 | 0.022268701 | 0,117122119 |
| 00:09:52 | 0.02251291  | 0,116833423 | 00:10:01 | 0.022263542 | 0,117128653 |
| 00:09:52 | 0.022507355 | 0,116840284 | 00:10:02 | 0.022258171 | 0,117135221 |
| 00:09:53 | 0.022501689 | 0,116847141 | 00:10:02 | 0.022252896 | 0,11714137  |
| 00:09:53 | 0.022496475 | 0,116853554 | 00:10:02 | 0.022247485 | 0,117147592 |

|          |             |             |          |             |             |
|----------|-------------|-------------|----------|-------------|-------------|
| 00:10:02 | 0.022241523 | 0,117153513 | 00:10:11 | 0.0219942   | 0,117438225 |
| 00:10:02 | 0.022236477 | 0,117158888 | 00:10:11 | 0.021989061 | 0,117443789 |
| 00:10:03 | 0.022230858 | 0,117164997 | 00:10:12 | 0.021983255 | 0,117449844 |
| 00:10:03 | 0.022225116 | 0,117171708 | 00:10:12 | 0.021977677 | 0,117455406 |
| 00:10:03 | 0.022219776 | 0,117177669 | 00:10:12 | 0.021972512 | 0,11746154  |
| 00:10:03 | 0.022213862 | 0,117184797 | 00:10:12 | 0.021967701 | 0,117467489 |
| 00:10:03 | 0.022208292 | 0,117191286 | 00:10:12 | 0.021962609 | 0,117473439 |
| 00:10:04 | 0.022202451 | 0,117197453 | 00:10:13 | 0.021957322 | 0,11747951  |
| 00:10:04 | 0.022197157 | 0,117203726 | 00:10:13 | 0.021951847 | 0,117485513 |
| 00:10:04 | 0.022191867 | 0,117209885 | 00:10:13 | 0.02194681  | 0,117491201 |
| 00:10:04 | 0.022185923 | 0,117216254 | 00:10:13 | 0.02194175  | 0,117497187 |
| 00:10:04 | 0.022180713 | 0,11722258  | 00:10:13 | 0.021936414 | 0,117502838 |
| 00:10:04 | 0.02217552  | 0,117228476 | 00:10:14 | 0.021930521 | 0,117508995 |
| 00:10:05 | 0.022170019 | 0,117234875 | 00:10:14 | 0.021925347 | 0,117514673 |
| 00:10:05 | 0.022164363 | 0,117241346 | 00:10:14 | 0.021920531 | 0,117520715 |
| 00:10:05 | 0.022159593 | 0,117247489 | 00:10:14 | 0.021915275 | 0,117526262 |
| 00:10:05 | 0.022153977 | 0,117253914 | 00:10:14 | 0.021910325 | 0,117532292 |
| 00:10:05 | 0.022148945 | 0,117260213 | 00:10:15 | 0.021904651 | 0,117538066 |
| 00:10:06 | 0.02214326  | 0,117266231 | 00:10:15 | 0.021899392 | 0,117543878 |
| 00:10:06 | 0.022137927 | 0,11727292  | 00:10:15 | 0.02189423  | 0,117550161 |
| 00:10:06 | 0.02213248  | 0,117279012 | 00:10:15 | 0.021888647 | 0,117555852 |
| 00:10:06 | 0.022127267 | 0,117285599 | 00:10:15 | 0.021883194 | 0,117562103 |
| 00:10:06 | 0.02212197  | 0,117291823 | 00:10:16 | 0.021877835 | 0,117568454 |
| 00:10:07 | 0.022116797 | 0,117298291 | 00:10:16 | 0.021872847 | 0,117574509 |
| 00:10:07 | 0.022111653 | 0,117304164 | 00:10:16 | 0.021867856 | 0,11758067  |
| 00:10:07 | 0.022106329 | 0,117310587 | 00:10:16 | 0.021862609 | 0,117586527 |
| 00:10:07 | 0.022100654 | 0,1173168   | 00:10:16 | 0.021857595 | 0,117592432 |
| 00:10:07 | 0.022095576 | 0,117323158 | 00:10:17 | 0.021851895 | 0,117598544 |
| 00:10:08 | 0.022089615 | 0,117329231 | 00:10:17 | 0.021845929 | 0,11760474  |
| 00:10:08 | 0.022084273 | 0,117335227 | 00:10:17 | 0.021840693 | 0,11761064  |
| 00:10:08 | 0.022077829 | 0,117341189 | 00:10:17 | 0.02183549  | 0,117616386 |
| 00:10:08 | 0.022072719 | 0,117347049 | 00:10:17 | 0.021829892 | 0,117622362 |
| 00:10:08 | 0.02206712  | 0,117353187 | 00:10:18 | 0.021824549 | 0,117627819 |
| 00:10:09 | 0.022061776 | 0,117359474 | 00:10:18 | 0.021819214 | 0,117633233 |
| 00:10:09 | 0.022057053 | 0,117365791 | 00:10:18 | 0.021814313 | 0,117638982 |
| 00:10:09 | 0.022052266 | 0,117371438 | 00:10:18 | 0.021809076 | 0,117644855 |
| 00:10:09 | 0.022047179 | 0,117377375 | 00:10:18 | 0.021803189 | 0,117650987 |
| 00:10:09 | 0.022042415 | 0,117383052 | 00:10:19 | 0.021798054 | 0,117656918 |
| 00:10:10 | 0.022036807 | 0,117389173 | 00:10:19 | 0.021792662 | 0,117663083 |
| 00:10:10 | 0.02203117  | 0,117395594 | 00:10:19 | 0.02178796  | 0,11766921  |
| 00:10:10 | 0.022025886 | 0,117401371 | 00:10:19 | 0.021782894 | 0,117674946 |
| 00:10:10 | 0.022020851 | 0,117407622 | 00:10:19 | 0.021777158 | 0,117680665 |
| 00:10:10 | 0.022016077 | 0,117413895 | 00:10:19 | 0.021772134 | 0,117686531 |
| 00:10:11 | 0.02201052  | 0,117419818 | 00:10:20 | 0.02176757  | 0,117692706 |
| 00:10:11 | 0.022005127 | 0,117426154 | 00:10:20 | 0.021762859 | 0,117698716 |
| 00:10:11 | 0.021999283 | 0,117432147 | 00:10:20 | 0.021757859 | 0,117704582 |

|          |             |             |          |             |             |
|----------|-------------|-------------|----------|-------------|-------------|
| 00:10:20 | 0.021753193 | 0,117710882 | 00:10:29 | 0.021520974 | 0,117983151 |
| 00:10:21 | 0.021747853 | 0,117716991 | 00:10:30 | 0.021515882 | 0,117988916 |
| 00:10:21 | 0.021742176 | 0,117723214 | 00:10:30 | 0.02151052  | 0,117994295 |
| 00:10:21 | 0.021736718 | 0,117728864 | 00:10:30 | 0.021505188 | 0,118000161 |
| 00:10:21 | 0.021731406 | 0,117734939 | 00:10:30 | 0.021500386 | 0,118005543 |
| 00:10:21 | 0.021726483 | 0,117740829 | 00:10:30 | 0.021495013 | 0,118011446 |
| 00:10:22 | 0.02172169  | 0,117746938 | 00:10:31 | 0.02149024  | 0,118017172 |
| 00:10:22 | 0.021716545 | 0,117753085 | 00:10:31 | 0.021485697 | 0,118023327 |
| 00:10:22 | 0.021711692 | 0,117758555 | 00:10:31 | 0.021479915 | 0,118028958 |
| 00:10:22 | 0.021706801 | 0,117764295 | 00:10:31 | 0.02147486  | 0,118034934 |
| 00:10:22 | 0.021701613 | 0,117769695 | 00:10:31 | 0.021469731 | 0,11804083  |
| 00:10:22 | 0.02169574  | 0,117775934 | 00:10:32 | 0.021464418 | 0,118046585 |
| 00:10:23 | 0.021691152 | 0,117782125 | 00:10:32 | 0.021459277 | 0,118052459 |
| 00:10:23 | 0.021685707 | 0,117788416 | 00:10:32 | 0.021454478 | 0,118058334 |
| 00:10:23 | 0.02168098  | 0,117794391 | 00:10:32 | 0.021449346 | 0,118064334 |
| 00:10:23 | 0.021675783 | 0,117800654 | 00:10:32 | 0.021444274 | 0,118070163 |
| 00:10:24 | 0.021670665 | 0,117806361 | 00:10:33 | 0.021439801 | 0,118075939 |
| 00:10:24 | 0.021665744 | 0,117812301 | 00:10:33 | 0.021434579 | 0,118081364 |
| 00:10:24 | 0.02166097  | 0,117818339 | 00:10:33 | 0.021429745 | 0,118087141 |
| 00:10:24 | 0.02165598  | 0,117824919 | 00:10:33 | 0.021424979 | 0,118092948 |
| 00:10:24 | 0.021650972 | 0,117830425 | 00:10:33 | 0.021420371 | 0,118098504 |
| 00:10:24 | 0.021645586 | 0,117836553 | 00:10:34 | 0.021415142 | 0,118104177 |
| 00:10:25 | 0.021640576 | 0,117842742 | 00:10:34 | 0.021409835 | 0,11810964  |
| 00:10:25 | 0.021635335 | 0,117848608 | 00:10:34 | 0.021404947 | 0,118115419 |
| 00:10:25 | 0.021630623 | 0,117854835 | 00:10:34 | 0.021400201 | 0,118121424 |
| 00:10:25 | 0.021625454 | 0,117860434 | 00:10:34 | 0.021395128 | 0,118126894 |
| 00:10:25 | 0.021620721 | 0,117865923 | 00:10:35 | 0.021389691 | 0,118132717 |
| 00:10:26 | 0.021615884 | 0,117872263 | 00:10:35 | 0.021384441 | 0,118138305 |
| 00:10:26 | 0.021610648 | 0,117878593 | 00:10:35 | 0.021378962 | 0,118144079 |
| 00:10:26 | 0.021605696 | 0,117884426 | 00:10:35 | 0.021374223 | 0,118149592 |
| 00:10:26 | 0.021600736 | 0,117890385 | 00:10:35 | 0.021368903 | 0,118155121 |
| 00:10:26 | 0.021596066 | 0,117896061 | 00:10:36 | 0.021364067 | 0,11816072  |
| 00:10:27 | 0.02159099  | 0,117902228 | 00:10:36 | 0.021358974 | 0,118166218 |
| 00:10:27 | 0.021585986 | 0,117908085 | 00:10:36 | 0.021354349 | 0,118171768 |
| 00:10:27 | 0.021581028 | 0,117914053 | 00:10:36 | 0.021348965 | 0,118177079 |
| 00:10:27 | 0.02157651  | 0,117919906 | 00:10:36 | 0.021344093 | 0,118182373 |
| 00:10:27 | 0.021570921 | 0,117925577 | 00:10:37 | 0.021338778 | 0,118188047 |
| 00:10:28 | 0.021565849 | 0,117931331 | 00:10:37 | 0.021333645 | 0,118193877 |
| 00:10:28 | 0.021561187 | 0,117937299 | 00:10:37 | 0.021328946 | 0,11820017  |
| 00:10:28 | 0.021556113 | 0,117942968 | 00:10:37 | 0.021324351 | 0,11820588  |
| 00:10:28 | 0.021550896 | 0,117948784 | 00:10:37 | 0.021319757 | 0,118211643 |
| 00:10:28 | 0.021545726 | 0,11795475  | 00:10:38 | 0.021315243 | 0,118217214 |
| 00:10:29 | 0.021540959 | 0,117960103 | 00:10:38 | 0.021310203 | 0,118222188 |
| 00:10:29 | 0.021535493 | 0,117965381 | 00:10:38 | 0.021304884 | 0,118228228 |
| 00:10:29 | 0.021530571 | 0,117971191 | 00:10:38 | 0.021299948 | 0,118234172 |
| 00:10:29 | 0.021525619 | 0,117976847 | 00:10:38 | 0.021294198 | 0,118239732 |

|          |             |             |          |             |             |
|----------|-------------|-------------|----------|-------------|-------------|
| 00:10:38 | 0.021289808 | 0,118245268 | 00:10:48 | 0.021064283 | 0,118501503 |
| 00:10:39 | 0.021284879 | 0,118250901 | 00:10:48 | 0.02105936  | 0,118506882 |
| 00:10:39 | 0.021280204 | 0,118256793 | 00:10:48 | 0.021055055 | 0,118512261 |
| 00:10:39 | 0.021275484 | 0,118262353 | 00:10:48 | 0.02105037  | 0,11851805  |
| 00:10:39 | 0.021270264 | 0,118267826 | 00:10:48 | 0.021045628 | 0,118523416 |
| 00:10:39 | 0.021265674 | 0,118273201 | 00:10:49 | 0.021040414 | 0,118528484 |
| 00:10:40 | 0.021260651 | 0,118278444 | 00:10:49 | 0.021035895 | 0,118534045 |
| 00:10:40 | 0.021255971 | 0,118284108 | 00:10:49 | 0.021030842 | 0,118539598 |
| 00:10:40 | 0.021251003 | 0,118289721 | 00:10:49 | 0.021025354 | 0,118544755 |
| 00:10:40 | 0.021246152 | 0,118295093 | 00:10:49 | 0.021021031 | 0,11855012  |
| 00:10:40 | 0.02124034  | 0,118300465 | 00:10:50 | 0.021016456 | 0,118555613 |
| 00:10:41 | 0.021235401 | 0,118305939 | 00:10:50 | 0.021011903 | 0,118561072 |
| 00:10:41 | 0.021230414 | 0,118311559 | 00:10:50 | 0.021007129 | 0,118566826 |
| 00:10:41 | 0.021225389 | 0,11831743  | 00:10:50 | 0.021001742 | 0,118572526 |
| 00:10:41 | 0.021220115 | 0,118323209 | 00:10:50 | 0.020997099 | 0,118578251 |
| 00:10:41 | 0.021214853 | 0,118328818 | 00:10:51 | 0.020992265 | 0,118583666 |
| 00:10:42 | 0.021209349 | 0,118334693 | 00:10:51 | 0.02098777  | 0,118589102 |
| 00:10:42 | 0.021204446 | 0,118340347 | 00:10:51 | 0.020983355 | 0,118594357 |
| 00:10:42 | 0.021199294 | 0,118345851 | 00:10:51 | 0.020978547 | 0,118599607 |
| 00:10:42 | 0.021194288 | 0,118351361 | 00:10:51 | 0.020973864 | 0,11860518  |
| 00:10:42 | 0.021189688 | 0,118356783 | 00:10:52 | 0.020969291 | 0,118610855 |
| 00:10:43 | 0.021185036 | 0,11836193  | 00:10:52 | 0.020964898 | 0,118615908 |
| 00:10:43 | 0.021180114 | 0,118367485 | 00:10:52 | 0.020960449 | 0,118621457 |
| 00:10:43 | 0.021175468 | 0,118373362 | 00:10:52 | 0.020955659 | 0,11862702  |
| 00:10:43 | 0.021170699 | 0,118379048 | 00:10:52 | 0.020950872 | 0,118632638 |
| 00:10:43 | 0.021166053 | 0,118384377 | 00:10:53 | 0.020946296 | 0,118637771 |
| 00:10:44 | 0.021160987 | 0,118389932 | 00:10:53 | 0.020941601 | 0,118643237 |
| 00:10:44 | 0.021156639 | 0,118395613 | 00:10:53 | 0.020936585 | 0,118648473 |
| 00:10:44 | 0.021151696 | 0,118401442 | 00:10:53 | 0.020931573 | 0,118653592 |
| 00:10:44 | 0.021146846 | 0,11840639  | 00:10:53 | 0.020926974 | 0,118658876 |
| 00:10:44 | 0.021142111 | 0,118412173 | 00:10:53 | 0.020921993 | 0,118664314 |
| 00:10:45 | 0.021137157 | 0,118417898 | 00:10:54 | 0.020916382 | 0,11866969  |
| 00:10:45 | 0.021132698 | 0,11842391  | 00:10:54 | 0.020911242 | 0,118674821 |
| 00:10:45 | 0.021127817 | 0,118429456 | 00:10:54 | 0.02090649  | 0,118680739 |
| 00:10:45 | 0.021123097 | 0,118434613 | 00:10:54 | 0.020901327 | 0,118686301 |
| 00:10:45 | 0.021118702 | 0,118440058 | 00:10:54 | 0.020896511 | 0,118691869 |
| 00:10:46 | 0.021113753 | 0,118446061 | 00:10:55 | 0.020892014 | 0,118697604 |
| 00:10:46 | 0.021109094 | 0,118451291 | 00:10:55 | 0.020886502 | 0,118702706 |
| 00:10:46 | 0.021104276 | 0,11845694  | 00:10:55 | 0.020881696 | 0,118708011 |
| 00:10:46 | 0.021098879 | 0,118462735 | 00:10:55 | 0.020876721 | 0,118713314 |
| 00:10:46 | 0.021093743 | 0,118468148 | 00:10:56 | 0.020871968 | 0,118718419 |
| 00:10:47 | 0.021088594 | 0,118473564 | 00:10:56 | 0.020867198 | 0,118724012 |
| 00:10:47 | 0.021084066 | 0,118478954 | 00:10:56 | 0.020863027 | 0,118729275 |
| 00:10:47 | 0.021079458 | 0,118484602 | 00:10:56 | 0.020858458 | 0,118734518 |
| 00:10:47 | 0.021074707 | 0,118490391 | 00:10:56 | 0.020853576 | 0,11873993  |
| 00:10:47 | 0.021069503 | 0,118495998 | 00:10:56 | 0.020848679 | 0,118745243 |

|          |             |             |          |             |             |
|----------|-------------|-------------|----------|-------------|-------------|
| 00:10:57 | 0.020843906 | 0,118750665 | 00:11:06 | 0.020634593 | 0,118994289 |
| 00:10:57 | 0.020839088 | 0,118756574 | 00:11:06 | 0.020629857 | 0,118999528 |
| 00:10:57 | 0.020834654 | 0,11876213  | 00:11:06 | 0.020625457 | 0,119004814 |
| 00:10:57 | 0.020829837 | 0,118767728 | 00:11:06 | 0.020621238 | 0,119010037 |
| 00:10:58 | 0.020824957 | 0,118773006 | 00:11:07 | 0.020616535 | 0,119015168 |
| 00:10:58 | 0.020820261 | 0,118778482 | 00:11:07 | 0.020611861 | 0,119020284 |
| 00:10:58 | 0.020815915 | 0,118783452 | 00:11:07 | 0.020607428 | 0,119025814 |
| 00:10:58 | 0.02081119  | 0,118788846 | 00:11:07 | 0.020602744 | 0,119030849 |
| 00:10:58 | 0.020806604 | 0,118794083 | 00:11:07 | 0.020598472 | 0,119036655 |
| 00:10:58 | 0.0208021   | 0,118799697 | 00:11:08 | 0.020594139 | 0,119041465 |
| 00:10:59 | 0.020797178 | 0,118804783 | 00:11:08 | 0.020589691 | 0,119046338 |
| 00:10:59 | 0.020793094 | 0,118809923 | 00:11:08 | 0.020585148 | 0,119051239 |
| 00:10:59 | 0.020788896 | 0,118815623 | 00:11:08 | 0.020579927 | 0,119056313 |
| 00:10:59 | 0.020784489 | 0,118820782 | 00:11:08 | 0.020575243 | 0,119061649 |
| 00:10:59 | 0.020779747 | 0,118825878 | 00:11:09 | 0.020570384 | 0,119066466 |
| 00:11:00 | 0.020775009 | 0,118831416 | 00:11:09 | 0.020565793 | 0,119071312 |
| 00:11:00 | 0.020770064 | 0,118836075 | 00:11:09 | 0.020561625 | 0,119076423 |
| 00:11:00 | 0.020764903 | 0,118841289 | 00:11:09 | 0.020557504 | 0,119081648 |
| 00:11:00 | 0.020760037 | 0,118846439 | 00:11:09 | 0.020552832 | 0,119086825 |
| 00:11:00 | 0.020755589 | 0,118852113 | 00:11:10 | 0.020548508 | 0,119091786 |
| 00:11:01 | 0.020751149 | 0,118857507 | 00:11:10 | 0.020544057 | 0,119096871 |
| 00:11:01 | 0.020746607 | 0,118862953 | 00:11:10 | 0.020539441 | 0,119101671 |
| 00:11:01 | 0.020742249 | 0,118868565 | 00:11:10 | 0.020535232 | 0,119107102 |
| 00:11:01 | 0.020738054 | 0,118874373 | 00:11:10 | 0.020530518 | 0,119112316 |
| 00:11:01 | 0.020733498 | 0,118879346 | 00:11:11 | 0.020526024 | 0,119117588 |
| 00:11:02 | 0.020729133 | 0,118884665 | 00:11:11 | 0.020521278 | 0,119122519 |
| 00:11:02 | 0.020724506 | 0,118889611 | 00:11:11 | 0.020517188 | 0,119127683 |
| 00:11:02 | 0.020719527 | 0,118895158 | 00:11:11 | 0.020512535 | 0,119132764 |
| 00:11:02 | 0.020715268 | 0,118900445 | 00:11:11 | 0.020508001 | 0,119137562 |
| 00:11:02 | 0.020710796 | 0,118905642 | 00:11:12 | 0.020503329 | 0,119143024 |
| 00:11:03 | 0.020706488 | 0,118910827 | 00:11:12 | 0.020499061 | 0,119147795 |
| 00:11:03 | 0.020702198 | 0,118916218 | 00:11:12 | 0.02049485  | 0,11915296  |
| 00:11:03 | 0.020697902 | 0,118922011 | 00:11:12 | 0.020490367 | 0,11915818  |
| 00:11:03 | 0.020693698 | 0,118927458 | 00:11:12 | 0.020486625 | 0,119163131 |
| 00:11:03 | 0.020688969 | 0,118932468 | 00:11:13 | 0.020482128 | 0,119168193 |
| 00:11:04 | 0.020684748 | 0,118937807 | 00:11:13 | 0.020477678 | 0,119173292 |
| 00:11:04 | 0.020680169 | 0,118942723 | 00:11:13 | 0.020472838 | 0,119178173 |
| 00:11:04 | 0.02067599  | 0,118947977 | 00:11:13 | 0.020468979 | 0,119183614 |
| 00:11:04 | 0.020671094 | 0,118953206 | 00:11:13 | 0.020464166 | 0,119188746 |
| 00:11:04 | 0.020666728 | 0,118958391 | 00:11:13 | 0.020459816 | 0,119193645 |
| 00:11:05 | 0.020662407 | 0,118963403 | 00:11:14 | 0.020455636 | 0,119198345 |
| 00:11:05 | 0.020658266 | 0,118968421 | 00:11:14 | 0.020450689 | 0,119203034 |
| 00:11:05 | 0.020653939 | 0,118973728 | 00:11:14 | 0.020446258 | 0,119208014 |
| 00:11:05 | 0.020649134 | 0,118978859 | 00:11:14 | 0.020441922 | 0,119213258 |
| 00:11:05 | 0.02064424  | 0,118984312 | 00:11:14 | 0.020437116 | 0,119218552 |
| 00:11:06 | 0.020639313 | 0,118989503 | 00:11:15 | 0.020432749 | 0,119223528 |

|          |             |             |          |             |             |
|----------|-------------|-------------|----------|-------------|-------------|
| 00:11:15 | 0.02042815  | 0,119228938 | 00:11:24 | 0.020225277 | 0,119460283 |
| 00:11:15 | 0.020423866 | 0,119234222 | 00:11:24 | 0.020220911 | 0,119465224 |
| 00:11:15 | 0.020419069 | 0,119239089 | 00:11:24 | 0.020216595 | 0,119470084 |
| 00:11:15 | 0.020414391 | 0,119244236 | 00:11:25 | 0.020213249 | 0,119474898 |
| 00:11:16 | 0.020409914 | 0,119248937 | 00:11:25 | 0.020209447 | 0,119479546 |
| 00:11:16 | 0.020405522 | 0,119253914 | 00:11:25 | 0.020205487 | 0,119484422 |
| 00:11:16 | 0.020400856 | 0,119259194 | 00:11:25 | 0.02020125  | 0,119489354 |
| 00:11:16 | 0.020396276 | 0,119264586 | 00:11:25 | 0.020196489 | 0,11949425  |
| 00:11:16 | 0.020391663 | 0,119269462 | 00:11:26 | 0.020191782 | 0,119498832 |
| 00:11:17 | 0.020386506 | 0,119274503 | 00:11:26 | 0.020187698 | 0,119503902 |
| 00:11:17 | 0.020382147 | 0,119279698 | 00:11:26 | 0.020183433 | 0,119508495 |
| 00:11:17 | 0.020377973 | 0,119284903 | 00:11:26 | 0.020179147 | 0,119513544 |
| 00:11:17 | 0.020373763 | 0,119290291 | 00:11:26 | 0.020175325 | 0,119518319 |
| 00:11:17 | 0.020369495 | 0,119295553 | 00:11:27 | 0.020170596 | 0,119523429 |
| 00:11:18 | 0.020364839 | 0,119300599 | 00:11:27 | 0.020166121 | 0,119528542 |
| 00:11:18 | 0.020360904 | 0,119305681 | 00:11:27 | 0.02016136  | 0,119533622 |
| 00:11:18 | 0.020356434 | 0,119310584 | 00:11:27 | 0.020156778 | 0,119538466 |
| 00:11:18 | 0.020351959 | 0,11931548  | 00:11:27 | 0.020152621 | 0,119543342 |
| 00:11:18 | 0.020347381 | 0,119320427 | 00:11:28 | 0.020148465 | 0,119547886 |
| 00:11:19 | 0.020342865 | 0,119325551 | 00:11:28 | 0.020143997 | 0,11955255  |
| 00:11:19 | 0.020338672 | 0,119330559 | 00:11:28 | 0.020140004 | 0,119557207 |
| 00:11:19 | 0.020334065 | 0,119335191 | 00:11:28 | 0.020136286 | 0,119562326 |
| 00:11:19 | 0.020329467 | 0,119340117 | 00:11:28 | 0.020132126 | 0,11956723  |
| 00:11:19 | 0.020325734 | 0,119344866 | 00:11:28 | 0.02012802  | 0,119572478 |
| 00:11:20 | 0.02032133  | 0,1193496   | 00:11:29 | 0.020123547 | 0,11957739  |
| 00:11:20 | 0.020316858 | 0,119355151 | 00:11:29 | 0.020119336 | 0,11958233  |
| 00:11:20 | 0.020312606 | 0,119360065 | 00:11:29 | 0.020114804 | 0,119587148 |
| 00:11:20 | 0.020308296 | 0,119365062 | 00:11:29 | 0.020110347 | 0,119591832 |
| 00:11:20 | 0.020304159 | 0,119370007 | 00:11:29 | 0.020105627 | 0,119597078 |
| 00:11:21 | 0.020300191 | 0,119375305 | 00:11:30 | 0.020101504 | 0,119602032 |
| 00:11:21 | 0.020296252 | 0,119380278 | 00:11:30 | 0.020097147 | 0,119606596 |
| 00:11:21 | 0.020291917 | 0,1193854   | 00:11:30 | 0.020093196 | 0,119611421 |
| 00:11:21 | 0.020287688 | 0,119390483 | 00:11:30 | 0.020088872 | 0,119616186 |
| 00:11:21 | 0.020283092 | 0,119395395 | 00:11:31 | 0.020084589 | 0,119620981 |
| 00:11:22 | 0.020278539 | 0,119400448 | 00:11:31 | 0.020080479 | 0,119625975 |
| 00:11:22 | 0.020273929 | 0,119405294 | 00:11:31 | 0.020076415 | 0,119630661 |
| 00:11:22 | 0.020269364 | 0,119410578 | 00:11:31 | 0.020071909 | 0,119635505 |
| 00:11:22 | 0.020265023 | 0,119415286 | 00:11:31 | 0.020067728 | 0,119640038 |
| 00:11:22 | 0.02026072  | 0,119420213 | 00:11:31 | 0.020063619 | 0,119644712 |
| 00:11:23 | 0.020256127 | 0,119424996 | 00:11:32 | 0.020059423 | 0,119649385 |
| 00:11:23 | 0.020252185 | 0,119429928 | 00:11:32 | 0.020055691 | 0,11965441  |
| 00:11:23 | 0.020247956 | 0,119434878 | 00:11:32 | 0.020051268 | 0,119658729 |
| 00:11:23 | 0.020243173 | 0,119440173 | 00:11:32 | 0.020046623 | 0,119663434 |
| 00:11:23 | 0.020238623 | 0,119445514 | 00:11:32 | 0.020042389 | 0,119667906 |
| 00:11:24 | 0.020234496 | 0,119450678 | 00:11:33 | 0.020037945 | 0,119672693 |
| 00:11:24 | 0.02022997  | 0,119455505 | 00:11:33 | 0.02003353  | 0,119677235 |

|          |             |             |          |             |             |
|----------|-------------|-------------|----------|-------------|-------------|
| 00:11:33 | 0.020029149 | 0,119681907 | 00:11:42 | 0.019834793 | 0,119897575 |
| 00:11:33 | 0.02002434  | 0,119687255 | 00:11:42 | 0.019830192 | 0,119902177 |
| 00:11:33 | 0.020019919 | 0,119692335 | 00:11:43 | 0.019825429 | 0,119906996 |
| 00:11:34 | 0.020015835 | 0,119697114 | 00:11:43 | 0.019821407 | 0,119911348 |
| 00:11:34 | 0.020011769 | 0,119701845 | 00:11:43 | 0.019817064 | 0,119916122 |
| 00:11:34 | 0.020007691 | 0,119706576 | 00:11:43 | 0.019812888 | 0,119920871 |
| 00:11:34 | 0.020003252 | 0,119711167 | 00:11:43 | 0.019808397 | 0,119925804 |
| 00:11:34 | 0.019999046 | 0,11971567  | 00:11:44 | 0.01980425  | 0,119930371 |
| 00:11:35 | 0.019994367 | 0,119720267 | 00:11:44 | 0.01980012  | 0,11993484  |
| 00:11:35 | 0.019990157 | 0,119724846 | 00:11:44 | 0.019796306 | 0,119939796 |
| 00:11:35 | 0.019985715 | 0,119729574 | 00:11:44 | 0.019792648 | 0,119944256 |
| 00:11:35 | 0.019981087 | 0,119734459 | 00:11:44 | 0.019788783 | 0,119948892 |
| 00:11:35 | 0.019976883 | 0,119739032 | 00:11:45 | 0.019784735 | 0,119953295 |
| 00:11:36 | 0.019972567 | 0,119743772 | 00:11:45 | 0.019781066 | 0,119957514 |
| 00:11:36 | 0.019968358 | 0,119748916 | 00:11:45 | 0.01977714  | 0,119962164 |
| 00:11:36 | 0.019964159 | 0,119753806 | 00:11:45 | 0.019772987 | 0,119966638 |
| 00:11:36 | 0.019959463 | 0,119758519 | 00:11:45 | 0.01976879  | 0,119971059 |
| 00:11:36 | 0.01995484  | 0,119763539 | 00:11:46 | 0.019763993 | 0,119975508 |
| 00:11:37 | 0.019950525 | 0,119768084 | 00:11:46 | 0.019760455 | 0,119979875 |
| 00:11:37 | 0.019946372 | 0,119773013 | 00:11:46 | 0.019756708 | 0,119984337 |
| 00:11:37 | 0.01994241  | 0,119777535 | 00:11:46 | 0.019752603 | 0,119988868 |
| 00:11:37 | 0.019938237 | 0,119782158 | 00:11:46 | 0.019748216 | 0,11999326  |
| 00:11:37 | 0.019933745 | 0,119786762 | 00:11:46 | 0.019744857 | 0,119997979 |
| 00:11:38 | 0.01993003  | 0,119791696 | 00:11:47 | 0.01974196  | 0,120003764 |
| 00:11:38 | 0.019926299 | 0,119796455 | 00:11:47 | 0.019737576 | 0,120010814 |
| 00:11:38 | 0.019921855 | 0,119801607 | 00:11:47 | 0.019804388 | 0,120018365 |
| 00:11:38 | 0.019917946 | 0,119806289 | 00:11:47 | 0.019800962 | 0,120022689 |
| 00:11:38 | 0.019913273 | 0,119810617 | 00:11:47 | 0.019766869 | 0,120024294 |
| 00:11:39 | 0.019909146 | 0,119815276 | 00:11:48 | 0.019760857 | 0,120028623 |
| 00:11:39 | 0.019904519 | 0,119819928 | 00:11:48 | 0.019789308 | 0,12003594  |
| 00:11:39 | 0.019900761 | 0,119824347 | 00:11:48 | 0.019761641 | 0,120038734 |
| 00:11:39 | 0.019896588 | 0,119829242 | 00:11:48 | 0.019734718 | 0,120041246 |
| 00:11:39 | 0.019892363 | 0,119833666 | 00:11:49 | 0.019766031 | 0,120049151 |
| 00:11:40 | 0.019888565 | 0,119838071 | 00:11:49 | 0.019772974 | 0,120054642 |
| 00:11:40 | 0.019884899 | 0,119842191 | 00:11:49 | 0.019737134 | 0,120056512 |
| 00:11:40 | 0.019880516 | 0,119846758 | 00:11:49 | 0.019762595 | 0,120064334 |
| 00:11:40 | 0.019876683 | 0,119851459 | 00:11:49 | 0.019688475 | 0,120062398 |
| 00:11:40 | 0.019872384 | 0,119855931 | 00:11:49 | 0.019684676 | 0,120067019 |
| 00:11:41 | 0.019867831 | 0,119860966 | 00:11:50 | 0.019740989 | 0,120077367 |
| 00:11:41 | 0.019863512 | 0,119865643 | 00:11:50 | 0.019732384 | 0,120081979 |
| 00:11:41 | 0.019859439 | 0,119870047 | 00:11:50 | 0.019673019 | 0,120081561 |
| 00:11:41 | 0.019855028 | 0,119874794 | 00:11:50 | 0.019668825 | 0,120086213 |
| 00:11:41 | 0.019851012 | 0,119879584 | 00:11:50 | 0.019665051 | 0,120090647 |
| 00:11:42 | 0.019846806 | 0,119883743 | 00:11:51 | 0.019660631 | 0,120095131 |
| 00:11:42 | 0.019842802 | 0,119888284 | 00:11:51 | 0.019655825 | 0,120099711 |
| 00:11:42 | 0.019838612 | 0,11989304  | 00:11:51 | 0.019652066 | 0,120104475 |

|          |             |             |          |             |             |
|----------|-------------|-------------|----------|-------------|-------------|
| 00:11:51 | 0.019652781 | 0,120109666 | 00:12:00 | 0.019466348 | 0,120314382 |
| 00:11:51 | 0.019662934 | 0,120115488 | 00:12:01 | 0.019462505 | 0,120318535 |
| 00:11:52 | 0.019640336 | 0,120118293 | 00:12:01 | 0.019458385 | 0,120322858 |
| 00:11:52 | 0.019636287 | 0,120122537 | 00:12:01 | 0.019454917 | 0,120327352 |
| 00:11:52 | 0.019632405 | 0,120127487 | 00:12:01 | 0.019451258 | 0,120331868 |
| 00:11:52 | 0.019628632 | 0,120132142 | 00:12:01 | 0.019447396 | 0,120336207 |
| 00:11:52 | 0.019624656 | 0,120136369 | 00:12:02 | 0.019443184 | 0,120340519 |
| 00:11:53 | 0.019619736 | 0,120140674 | 00:12:02 | 0.019439583 | 0,120345005 |
| 00:11:53 | 0.019615884 | 0,120145111 | 00:12:02 | 0.019435986 | 0,120349412 |
| 00:11:53 | 0.019611982 | 0,120149667 | 00:12:02 | 0.019432572 | 0,120353907 |
| 00:11:53 | 0.019608204 | 0,120154571 | 00:12:02 | 0.019428372 | 0,12035815  |
| 00:11:53 | 0.019604104 | 0,120159124 | 00:12:03 | 0.019424437 | 0,120362746 |
| 00:11:54 | 0.01960042  | 0,120163748 | 00:12:03 | 0.019420304 | 0,12036668  |
| 00:11:54 | 0.019596094 | 0,120168484 | 00:12:03 | 0.01941687  | 0,120371033 |
| 00:11:54 | 0.019591829 | 0,120172993 | 00:12:03 | 0.019412761 | 0,120375478 |
| 00:11:54 | 0.019588067 | 0,120177507 | 00:12:03 | 0.019408924 | 0,120379891 |
| 00:11:54 | 0.01958372  | 0,120182448 | 00:12:04 | 0.019404985 | 0,120384605 |
| 00:11:55 | 0.019579635 | 0,120186391 | 00:12:04 | 0.01940111  | 0,120389297 |
| 00:11:55 | 0.019575395 | 0,120190722 | 00:12:04 | 0.019396848 | 0,120394023 |
| 00:11:55 | 0.019572002 | 0,120194709 | 00:12:04 | 0.019393037 | 0,120398288 |
| 00:11:55 | 0.019568233 | 0,120199115 | 00:12:04 | 0.019389364 | 0,120402617 |
| 00:11:55 | 0.019564574 | 0,120203421 | 00:12:04 | 0.019385619 | 0,120407156 |
| 00:11:56 | 0.019560436 | 0,120207855 | 00:12:05 | 0.019381908 | 0,120411392 |
| 00:11:56 | 0.019556639 | 0,120212196 | 00:12:05 | 0.019377599 | 0,120415363 |
| 00:11:56 | 0.019552806 | 0,120216653 | 00:12:05 | 0.019373897 | 0,120419683 |
| 00:11:56 | 0.019548976 | 0,120220871 | 00:12:05 | 0.019369884 | 0,120424487 |
| 00:11:56 | 0.019544565 | 0,120225623 | 00:12:06 | 0.019365829 | 0,120429075 |
| 00:11:57 | 0.019540872 | 0,120230059 | 00:12:06 | 0.019362226 | 0,12043281  |
| 00:11:57 | 0.019536879 | 0,120234796 | 00:12:06 | 0.019358188 | 0,120437077 |
| 00:11:57 | 0.019533002 | 0,120239395 | 00:12:06 | 0.019353941 | 0,120441479 |
| 00:11:57 | 0.019528016 | 0,12024394  | 00:12:06 | 0.019350239 | 0,120445775 |
| 00:11:57 | 0.019523886 | 0,120248245 | 00:12:06 | 0.019345893 | 0,120450058 |
| 00:11:58 | 0.01951984  | 0,120252319 | 00:12:07 | 0.019341791 | 0,120454034 |
| 00:11:58 | 0.019516309 | 0,120256984 | 00:12:07 | 0.019337516 | 0,120458471 |
| 00:11:58 | 0.019512635 | 0,120261383 | 00:12:07 | 0.019333852 | 0,120462636 |
| 00:11:58 | 0.019508704 | 0,120265436 | 00:12:07 | 0.019330073 | 0,120466819 |
| 00:11:58 | 0.019504757 | 0,120269777 | 00:12:07 | 0.019326236 | 0,120470884 |
| 00:11:59 | 0.019501035 | 0,120274123 | 00:12:08 | 0.019322271 | 0,12047561  |
| 00:11:59 | 0.019497385 | 0,120278454 | 00:12:08 | 0.019318591 | 0,120480133 |
| 00:11:59 | 0.01949369  | 0,120282891 | 00:12:08 | 0.019314719 | 0,120484394 |
| 00:11:59 | 0.019490142 | 0,120287275 | 00:12:08 | 0.019310599 | 0,120488489 |
| 00:11:59 | 0.019486616 | 0,12029192  | 00:12:08 | 0.019307408 | 0,120492953 |
| 00:12:00 | 0.01948221  | 0,120296476 | 00:12:09 | 0.019303568 | 0,120497246 |
| 00:12:00 | 0.019478417 | 0,120300907 | 00:12:09 | 0.019299993 | 0,120501577 |
| 00:12:00 | 0.019474466 | 0,120305251 | 00:12:09 | 0.019296266 | 0,120506027 |
| 00:12:00 | 0.019470637 | 0,120309888 | 00:12:09 | 0.019292592 | 0,120510053 |

|          |             |             |          |             |             |
|----------|-------------|-------------|----------|-------------|-------------|
| 00:12:09 | 0.019288621 | 0,120514286 | 00:12:19 | 0.019115847 | 0,120709401 |
| 00:12:10 | 0.01928426  | 0,120518722 | 00:12:19 | 0.019112371 | 0,120713959 |
| 00:12:10 | 0.019280379 | 0,120523059 | 00:12:19 | 0.019108935 | 0,120718153 |
| 00:12:10 | 0.01927623  | 0,120527257 | 00:12:19 | 0.019105651 | 0,120722496 |
| 00:12:10 | 0.019272822 | 0,120531602 | 00:12:19 | 0.019101683 | 0,120726101 |
| 00:12:10 | 0.019269244 | 0,120535991 | 00:12:20 | 0.019098033 | 0,120730587 |
| 00:12:11 | 0.019266065 | 0,120540279 | 00:12:20 | 0.019094345 | 0,120734923 |
| 00:12:11 | 0.019262283 | 0,120544797 | 00:12:20 | 0.01909068  | 0,120738787 |
| 00:12:11 | 0.01925847  | 0,120549033 | 00:12:20 | 0.019086842 | 0,120743235 |
| 00:12:11 | 0.019254845 | 0,120553435 | 00:12:20 | 0.019082797 | 0,120747307 |
| 00:12:11 | 0.019251616 | 0,120557693 | 00:12:21 | 0.019079054 | 0,120751516 |
| 00:12:12 | 0.019247682 | 0,120561801 | 00:12:21 | 0.01907524  | 0,120755564 |
| 00:12:12 | 0.019243587 | 0,120565983 | 00:12:21 | 0.019071848 | 0,120760076 |
| 00:12:12 | 0.019239737 | 0,120570313 | 00:12:21 | 0.019067801 | 0,120764246 |
| 00:12:12 | 0.019235664 | 0,12057458  | 00:12:21 | 0.0190643   | 0,120768838 |
| 00:12:12 | 0.019231984 | 0,120578729 | 00:12:21 | 0.019060416 | 0,120773047 |
| 00:12:13 | 0.019228433 | 0,120582916 | 00:12:22 | 0.019056348 | 0,120776841 |
| 00:12:13 | 0.019224591 | 0,120586993 | 00:12:22 | 0.01905289  | 0,120781196 |
| 00:12:13 | 0.019221329 | 0,120590974 | 00:12:22 | 0.019049042 | 0,120785376 |
| 00:12:13 | 0.019217333 | 0,120595189 | 00:12:22 | 0.019045838 | 0,120789416 |
| 00:12:13 | 0.019213417 | 0,120599604 | 00:12:22 | 0.019042331 | 0,12079375  |
| 00:12:14 | 0.019209578 | 0,120603744 | 00:12:23 | 0.019038495 | 0,120797921 |
| 00:12:14 | 0.019205934 | 0,120607601 | 00:12:23 | 0.019034894 | 0,120801783 |
| 00:12:14 | 0.019201993 | 0,120611572 | 00:12:23 | 0.01903135  | 0,120805645 |
| 00:12:14 | 0.019198361 | 0,120615839 | 00:12:23 | 0.019027737 | 0,120809996 |
| 00:12:14 | 0.01919465  | 0,120619828 | 00:12:23 | 0.019024252 | 0,120814594 |
| 00:12:15 | 0.019190631 | 0,120624331 | 00:12:24 | 0.019020797 | 0,120818416 |
| 00:12:15 | 0.019187197 | 0,120628499 | 00:12:24 | 0.019017632 | 0,120822566 |
| 00:12:15 | 0.019183034 | 0,120632593 | 00:12:24 | 0.019013675 | 0,120826812 |
| 00:12:15 | 0.019179673 | 0,12063693  | 00:12:24 | 0.019010095 | 0,120831028 |
| 00:12:15 | 0.019176751 | 0,12064163  | 00:12:24 | 0.019006319 | 0,120834927 |
| 00:12:16 | 0.019173108 | 0,120645792 | 00:12:25 | 0.019003017 | 0,120839253 |
| 00:12:16 | 0.019168915 | 0,12065009  | 00:12:25 | 0.018999072 | 0,120843289 |
| 00:12:16 | 0.01916484  | 0,120654077 | 00:12:25 | 0.018995437 | 0,120847224 |
| 00:12:16 | 0.019161204 | 0,12065807  | 00:12:25 | 0.018991882 | 0,120851455 |
| 00:12:16 | 0.019156961 | 0,120661874 | 00:12:25 | 0.018988002 | 0,12085552  |
| 00:12:17 | 0.019153098 | 0,120666251 | 00:12:26 | 0.018983842 | 0,120859101 |
| 00:12:17 | 0.019149589 | 0,120670242 | 00:12:26 | 0.018979917 | 0,120863313 |
| 00:12:17 | 0.019145647 | 0,120674394 | 00:12:26 | 0.018975731 | 0,120867173 |
| 00:12:17 | 0.019141938 | 0,120678847 | 00:12:26 | 0.01897192  | 0,120871233 |
| 00:12:17 | 0.019138348 | 0,120683303 | 00:12:26 | 0.018968261 | 0,12087522  |
| 00:12:18 | 0.01913477  | 0,120687752 | 00:12:27 | 0.018964646 | 0,120879399 |
| 00:12:18 | 0.0191309   | 0,120691957 | 00:12:27 | 0.018961015 | 0,120883221 |
| 00:12:18 | 0.019127187 | 0,120696332 | 00:12:27 | 0.018957191 | 0,120887338 |
| 00:12:18 | 0.019123418 | 0,120700793 | 00:12:27 | 0.018953737 | 0,120891467 |
| 00:12:18 | 0.019119776 | 0,120705427 | 00:12:27 | 0.018950206 | 0,120895332 |

|          |             |             |          |             |             |
|----------|-------------|-------------|----------|-------------|-------------|
| 00:12:28 | 0.018946641 | 0,120899159 | 00:12:37 | 0.018777444 | 0,121085411 |
| 00:12:28 | 0.018943026 | 0,12090338  | 00:12:37 | 0.018774042 | 0,121089179 |
| 00:12:28 | 0.018939181 | 0,120907496 | 00:12:37 | 0.018770044 | 0,121093371 |
| 00:12:28 | 0.018935913 | 0,120911504 | 00:12:37 | 0.018766593 | 0,121097281 |
| 00:12:28 | 0.018932581 | 0,120915485 | 00:12:37 | 0.018763016 | 0,121101171 |
| 00:12:29 | 0.01892834  | 0,120919639 | 00:12:38 | 0.01875966  | 0,121105446 |
| 00:12:29 | 0.018924875 | 0,120923853 | 00:12:38 | 0.018755704 | 0,121108862 |
| 00:12:29 | 0.018921075 | 0,120928085 | 00:12:38 | 0.018752202 | 0,121112901 |
| 00:12:29 | 0.018917352 | 0,120932073 | 00:12:38 | 0.018748699 | 0,121116822 |
| 00:12:29 | 0.018913718 | 0,120936207 | 00:12:39 | 0.018744842 | 0,121120842 |
| 00:12:30 | 0.018909728 | 0,120939993 | 00:12:39 | 0.018741071 | 0,121125018 |
| 00:12:30 | 0.018906247 | 0,120944122 | 00:12:39 | 0.018737635 | 0,121128877 |
| 00:12:30 | 0.018902732 | 0,12094827  | 00:12:39 | 0.018734244 | 0,121133049 |
| 00:12:30 | 0.018898588 | 0,120951964 | 00:12:39 | 0.018730108 | 0,121137123 |
| 00:12:30 | 0.018894912 | 0,120955398 | 00:12:39 | 0.018726279 | 0,121141002 |
| 00:12:31 | 0.018891196 | 0,120959473 | 00:12:40 | 0.01872264  | 0,121145288 |
| 00:12:31 | 0.018887549 | 0,12096352  | 00:12:40 | 0.018718776 | 0,121149411 |
| 00:12:31 | 0.018883916 | 0,120967212 | 00:12:40 | 0.018714871 | 0,121153464 |
| 00:12:31 | 0.018880578 | 0,12097101  | 00:12:40 | 0.018711321 | 0,121157885 |
| 00:12:31 | 0.018876991 | 0,120974964 | 00:12:40 | 0.018707789 | 0,121162037 |
| 00:12:32 | 0.018873624 | 0,120979264 | 00:12:41 | 0.018704293 | 0,121165721 |
| 00:12:32 | 0.018869271 | 0,120983322 | 00:12:41 | 0.018700531 | 0,121169912 |
| 00:12:32 | 0.018865498 | 0,120987464 | 00:12:41 | 0.018696702 | 0,121173877 |
| 00:12:32 | 0.018861667 | 0,120991406 | 00:12:41 | 0.018693703 | 0,12117794  |
| 00:12:32 | 0.018858306 | 0,120995237 | 00:12:41 | 0.018690252 | 0,121181518 |
| 00:12:33 | 0.01885512  | 0,120999292 | 00:12:42 | 0.018686545 | 0,121185321 |
| 00:12:33 | 0.018851155 | 0,121003067 | 00:12:42 | 0.018683519 | 0,121189272 |
| 00:12:33 | 0.018847625 | 0,121006903 | 00:12:42 | 0.018679682 | 0,121193505 |
| 00:12:33 | 0.018843777 | 0,121011194 | 00:12:42 | 0.018676317 | 0,121197512 |
| 00:12:33 | 0.018839745 | 0,121015218 | 00:12:42 | 0.018672829 | 0,121201862 |
| 00:12:34 | 0.018835835 | 0,121019631 | 00:12:43 | 0.018669134 | 0,121206139 |
| 00:12:34 | 0.018832532 | 0,121023948 | 00:12:43 | 0.01866546  | 0,121209991 |
| 00:12:34 | 0.018828803 | 0,121028182 | 00:12:43 | 0.01866165  | 0,121214262 |
| 00:12:34 | 0.018825147 | 0,121032558 | 00:12:43 | 0.018658322 | 0,121218552 |
| 00:12:34 | 0.018821343 | 0,121036421 | 00:12:43 | 0.018654842 | 0,121222635 |
| 00:12:35 | 0.018817633 | 0,121039919 | 00:12:44 | 0.018651076 | 0,121226162 |
| 00:12:35 | 0.018814055 | 0,121044359 | 00:12:44 | 0.018647973 | 0,121229463 |
| 00:12:35 | 0.01881048  | 0,121048577 | 00:12:44 | 0.018644598 | 0,121233733 |
| 00:12:35 | 0.018806396 | 0,12105264  | 00:12:44 | 0.018641205 | 0,121237334 |
| 00:12:35 | 0.018802812 | 0,121056683 | 00:12:44 | 0.018637913 | 0,12124117  |
| 00:12:36 | 0.018799186 | 0,121060607 | 00:12:45 | 0.018634275 | 0,121245219 |
| 00:12:36 | 0.018795337 | 0,121064273 | 00:12:45 | 0.018631117 | 0,12124928  |
| 00:12:36 | 0.018791798 | 0,121068371 | 00:12:45 | 0.018627392 | 0,121253387 |
| 00:12:36 | 0.018787658 | 0,121072468 | 00:12:45 | 0.018623897 | 0,121257181 |
| 00:12:36 | 0.018784187 | 0,121076985 | 00:12:45 | 0.018620514 | 0,121260756 |
| 00:12:37 | 0.018780501 | 0,121080962 | 00:12:46 | 0.018616728 | 0,121264636 |

|          |             |             |          |             |             |
|----------|-------------|-------------|----------|-------------|-------------|
| 00:12:46 | 0.018613656 | 0,121268497 | 00:12:55 | 0.018455324 | 0,121447551 |
| 00:12:46 | 0.018609671 | 0,121272421 | 00:12:55 | 0.01845215  | 0,121451453 |
| 00:12:46 | 0.018606159 | 0,121276083 | 00:12:55 | 0.018448982 | 0,121455328 |
| 00:12:46 | 0.018602285 | 0,12127994  | 00:12:55 | 0.018445884 | 0,121459051 |
| 00:12:47 | 0.018599029 | 0,121283958 | 00:12:56 | 0.018442775 | 0,121462597 |
| 00:12:47 | 0.018595681 | 0,121288182 | 00:12:56 | 0.018439479 | 0,121466295 |
| 00:12:47 | 0.018592401 | 0,121292055 | 00:12:56 | 0.018436199 | 0,121470124 |
| 00:12:47 | 0.018588959 | 0,121295815 | 00:12:56 | 0.018432794 | 0,121473837 |
| 00:12:47 | 0.018586088 | 0,121299812 | 00:12:57 | 0.018429449 | 0,121477745 |
| 00:12:48 | 0.018582836 | 0,121303836 | 00:12:57 | 0.018425703 | 0,121481593 |
| 00:12:48 | 0.018579522 | 0,121307803 | 00:12:57 | 0.018422299 | 0,12148516  |
| 00:12:48 | 0.018576759 | 0,121312135 | 00:12:57 | 0.018419118 | 0,121489118 |
| 00:12:48 | 0.018573532 | 0,121315939 | 00:12:57 | 0.018415919 | 0,121492806 |
| 00:12:48 | 0.018570151 | 0,12131949  | 00:12:57 | 0.01841207  | 0,121496492 |
| 00:12:49 | 0.018566619 | 0,121323273 | 00:12:58 | 0.018408803 | 0,121500349 |
| 00:12:49 | 0.018562704 | 0,121327264 | 00:12:58 | 0.01840514  | 0,121504387 |
| 00:12:49 | 0.018559819 | 0,121331184 | 00:12:58 | 0.018401214 | 0,12150824  |
| 00:12:49 | 0.018556129 | 0,121335077 | 00:12:58 | 0.018397916 | 0,121511783 |
| 00:12:49 | 0.018552577 | 0,121338593 | 00:12:58 | 0.018394558 | 0,121515707 |
| 00:12:50 | 0.018549247 | 0,121342252 | 00:12:59 | 0.018391097 | 0,121519491 |
| 00:12:50 | 0.018545486 | 0,12134629  | 00:12:59 | 0.018387323 | 0,121523101 |
| 00:12:50 | 0.018541896 | 0,12135013  | 00:12:59 | 0.018383958 | 0,121527021 |
| 00:12:50 | 0.018538176 | 0,121353881 | 00:12:59 | 0.018380735 | 0,121530997 |
| 00:12:50 | 0.018534604 | 0,121357655 | 00:12:59 | 0.018377339 | 0,121535199 |
| 00:12:51 | 0.018531241 | 0,121362063 | 00:13:00 | 0.018374038 | 0,121539399 |
| 00:12:51 | 0.018527432 | 0,121365801 | 00:13:00 | 0.018371156 | 0,121543058 |
| 00:12:51 | 0.018524038 | 0,121369549 | 00:13:00 | 0.018367394 | 0,121546892 |
| 00:12:51 | 0.018520646 | 0,121373479 | 00:13:00 | 0.018363876 | 0,121550406 |
| 00:12:51 | 0.018517282 | 0,121377309 | 00:13:00 | 0.018360466 | 0,121554079 |
| 00:12:52 | 0.018513916 | 0,121381396 | 00:13:01 | 0.018357113 | 0,121558126 |
| 00:12:52 | 0.018510373 | 0,121385449 | 00:13:01 | 0.018353428 | 0,121561892 |
| 00:12:52 | 0.01850684  | 0,121389206 | 00:13:01 | 0.018349929 | 0,121565189 |
| 00:12:52 | 0.018503152 | 0,12139295  | 00:13:01 | 0.018346793 | 0,12156869  |
| 00:12:52 | 0.01849983  | 0,121396823 | 00:13:01 | 0.018343194 | 0,121572132 |
| 00:12:53 | 0.01849655  | 0,121400655 | 00:13:02 | 0.018339745 | 0,121575514 |
| 00:12:53 | 0.01849294  | 0,121404356 | 00:13:02 | 0.01833673  | 0,12157931  |
| 00:12:53 | 0.018489468 | 0,121408142 | 00:13:02 | 0.018333424 | 0,121583138 |
| 00:12:53 | 0.018485662 | 0,121412372 | 00:13:02 | 0.018330272 | 0,121586788 |
| 00:12:53 | 0.018482129 | 0,121416135 | 00:13:02 | 0.018326898 | 0,121590433 |
| 00:12:54 | 0.0184793   | 0,121419806 | 00:13:03 | 0.018323665 | 0,121594273 |
| 00:12:54 | 0.018475916 | 0,121423639 | 00:13:03 | 0.018319801 | 0,121597971 |
| 00:12:54 | 0.018472578 | 0,121427564 | 00:13:03 | 0.018316298 | 0,121601561 |
| 00:12:54 | 0.018469068 | 0,12143179  | 00:13:03 | 0.018313103 | 0,121605691 |
| 00:12:54 | 0.018465523 | 0,121435781 | 00:13:03 | 0.018309715 | 0,121609195 |
| 00:12:55 | 0.018461838 | 0,121439619 | 00:13:04 | 0.018306573 | 0,12161312  |
| 00:12:55 | 0.018458636 | 0,121443516 | 00:13:04 | 0.0183038   | 0,12161704  |

|          |             |             |          |             |             |
|----------|-------------|-------------|----------|-------------|-------------|
| 00:13:04 | 0.01830039  | 0,121621022 | 00:13:13 | 0.018185708 | 0,121794897 |
| 00:13:04 | 0.018296847 | 0,121624767 | 00:13:13 | 0.018185167 | 0,12179881  |
| 00:13:04 | 0.018292851 | 0,121628526 | 00:13:14 | 0.018181834 | 0,121802257 |
| 00:13:05 | 0.018289802 | 0,12163241  | 00:13:14 | 0.018180286 | 0,121806199 |
| 00:13:05 | 0.018286448 | 0,121636182 | 00:13:14 | 0.01817919  | 0,121810319 |
| 00:13:05 | 0.018283249 | 0,121639833 | 00:13:14 | 0.018176418 | 0,121813735 |
| 00:13:05 | 0.018279692 | 0,121643702 | 00:13:14 | 0.01817379  | 0,121817193 |
| 00:13:05 | 0.018276442 | 0,12164767  | 00:13:14 | 0.018171468 | 0,121821017 |
| 00:13:06 | 0.018273342 | 0,121651911 | 00:13:15 | 0.018170855 | 0,121824935 |
| 00:13:06 | 0.018269881 | 0,121655396 | 00:13:15 | 0.018168786 | 0,121828621 |
| 00:13:06 | 0.018265956 | 0,121658599 | 00:13:15 | 0.018167631 | 0,12183251  |
| 00:13:06 | 0.01826278  | 0,121662303 | 00:13:15 | 0.018167096 | 0,121835982 |
| 00:13:06 | 0.018260047 | 0,121666242 | 00:13:15 | 0.018165276 | 0,121839694 |
| 00:13:07 | 0.018256664 | 0,121669828 | 00:13:16 | 0.018165775 | 0,121843949 |
| 00:13:07 | 0.018253351 | 0,121673656 | 00:13:16 | 0.018165411 | 0,121847627 |
| 00:13:07 | 0.018250151 | 0,121677655 | 00:13:16 | 0.018163052 | 0,121851261 |
| 00:13:07 | 0.018246323 | 0,121681382 | 00:13:16 | 0.018163534 | 0,12185529  |
| 00:13:07 | 0.018242881 | 0,121685162 | 00:13:16 | 0.018163349 | 0,121859199 |
| 00:13:08 | 0.01823995  | 0,121689557 | 00:13:17 | 0.018161278 | 0,121863316 |
| 00:13:08 | 0.018236691 | 0,12169282  | 00:13:17 | 0.018160186 | 0,12186734  |
| 00:13:08 | 0.018233721 | 0,121696416 | 00:13:17 | 0.018158877 | 0,121871085 |
| 00:13:08 | 0.018230297 | 0,121700215 | 00:13:17 | 0.018156706 | 0,121874484 |
| 00:13:08 | 0.018226898 | 0,121703832 | 00:13:17 | 0.018152471 | 0,121878088 |
| 00:13:09 | 0.018225118 | 0,121707756 | 00:13:18 | 0.018150035 | 0,121881427 |
| 00:13:09 | 0.018221766 | 0,121711602 | 00:13:18 | 0.018148901 | 0,121885246 |
| 00:13:09 | 0.018221118 | 0,121715608 | 00:13:18 | 0.018148362 | 0,121889241 |
| 00:13:09 | 0.018218923 | 0,12171927  | 00:13:18 | 0.018127825 | 0,121891311 |
| 00:13:09 | 0.018219446 | 0,121723351 | 00:13:18 | 0.018114913 | 0,121893966 |
| 00:13:10 | 0.01821659  | 0,121727094 | 00:13:19 | 0.018101427 | 0,121896764 |
| 00:13:10 | 0.018214644 | 0,121731077 | 00:13:19 | 0.018076537 | 0,121898392 |
| 00:13:10 | 0.018214343 | 0,121734966 | 00:13:19 | 0.018086795 | 0,121903341 |
| 00:13:10 | 0.018214149 | 0,121738923 | 00:13:19 | 0.018103689 | 0,121908558 |
| 00:13:10 | 0.018210558 | 0,121742312 | 00:13:19 | 0.018091642 | 0,121910846 |
| 00:13:11 | 0.018208801 | 0,121746253 | 00:13:20 | 0.018070514 | 0,121912759 |
| 00:13:11 | 0.018206355 | 0,1217498   | 00:13:20 | 0.018110598 | 0,121919905 |
| 00:13:11 | 0.018205338 | 0,121753338 | 00:13:20 | 0.018088312 | 0,121921567 |
| 00:13:11 | 0.0182035   | 0,121757233 | 00:13:20 | 0.018087535 | 0,121925433 |
| 00:13:11 | 0.018202063 | 0,12176136  | 00:13:20 | 0.018091392 | 0,121929464 |
| 00:13:12 | 0.018199821 | 0,121764853 | 00:13:21 | 0.018075229 | 0,121931783 |
| 00:13:12 | 0.018197823 | 0,121768734 | 00:13:21 | 0.018074809 | 0,121935568 |
| 00:13:12 | 0.018196074 | 0,121772385 | 00:13:21 | 0.018074248 | 0,12193941  |
| 00:13:12 | 0.018194976 | 0,121776219 | 00:13:21 | 0.018059264 | 0,121942111 |
| 00:13:12 | 0.018193954 | 0,121780153 | 00:13:21 | 0.018100171 | 0,121949957 |
| 00:13:13 | 0.018193451 | 0,121784173 | 00:13:22 | 0.018113486 | 0,121955052 |
| 00:13:13 | 0.018190194 | 0,121787934 | 00:13:22 | 0.018122805 | 0,12195982  |
| 00:13:13 | 0.018188062 | 0,121791248 | 00:13:22 | 0.01812293  | 0,121963768 |

|          |             |             |          |             |             |
|----------|-------------|-------------|----------|-------------|-------------|
| 00:13:22 | 0.018122414 | 0,121967746 | 00:13:31 | 0.017999014 | 0,122132772 |
| 00:13:22 | 0.018120513 | 0,121971649 | 00:13:31 | 0.017996016 | 0,122136325 |
| 00:13:23 | 0.018119186 | 0,121975243 | 00:13:32 | 0.017993077 | 0,122139867 |
| 00:13:23 | 0.018113227 | 0,12197806  | 00:13:32 | 0.017990149 | 0,122143635 |
| 00:13:23 | 0.018116393 | 0,121982355 | 00:13:32 | 0.017987659 | 0,122147206 |
| 00:13:23 | 0.018112338 | 0,121985987 | 00:13:32 | 0.017984968 | 0,122150681 |
| 00:13:23 | 0.018094895 | 0,121988287 | 00:13:32 | 0.017981934 | 0,122154357 |
| 00:13:24 | 0.01806115  | 0,121988993 | 00:13:33 | 0.017979113 | 0,122157809 |
| 00:13:24 | 0.018062898 | 0,121992889 | 00:13:33 | 0.017976185 | 0,12216142  |
| 00:13:24 | 0.018077391 | 0,121997752 | 00:13:33 | 0.017973147 | 0,12216502  |
| 00:13:24 | 0.018106861 | 0,122004493 | 00:13:33 | 0.01796997  | 0,122168767 |
| 00:13:24 | 0.018103862 | 0,122007641 | 00:13:33 | 0.017966601 | 0,122172387 |
| 00:13:25 | 0.018100667 | 0,122011066 | 00:13:34 | 0.017963722 | 0,12217602  |
| 00:13:25 | 0.018097764 | 0,122014704 | 00:13:34 | 0.017960859 | 0,122179614 |
| 00:13:25 | 0.018088031 | 0,122017522 | 00:13:34 | 0.017958294 | 0,122182778 |
| 00:13:25 | 0.01808782  | 0,122021267 | 00:13:34 | 0.017955536 | 0,122186142 |
| 00:13:25 | 0.018087688 | 0,122025408 | 00:13:34 | 0.017952605 | 0,122189751 |
| 00:13:26 | 0.018085008 | 0,122029143 | 00:13:35 | 0.017949929 | 0,122192952 |
| 00:13:26 | 0.018082094 | 0,122032823 | 00:13:35 | 0.017947075 | 0,122196742 |
| 00:13:26 | 0.018068743 | 0,122035418 | 00:13:35 | 0.017944477 | 0,122200024 |
| 00:13:26 | 0.018033867 | 0,122036006 | 00:13:35 | 0.017941253 | 0,122203427 |
| 00:13:26 | 0.018019516 | 0,122038521 | 00:13:35 | 0.017937951 | 0,122207081 |
| 00:13:27 | 0.018042981 | 0,122044585 | 00:13:36 | 0.017935303 | 0,122210919 |
| 00:13:27 | 0.018066909 | 0,122050553 | 00:13:36 | 0.017932276 | 0,122214407 |
| 00:13:27 | 0.018006298 | 0,122048911 | 00:13:36 | 0.017929247 | 0,122217752 |
| 00:13:27 | 0.018017427 | 0,122053831 | 00:13:36 | 0.017926674 | 0,122221541 |
| 00:13:27 | 0.01803273  | 0,122058966 | 00:13:36 | 0.017922974 | 0,122225453 |
| 00:13:28 | 0.01797683  | 0,122057622 | 00:13:37 | 0.017919798 | 0,122229115 |
| 00:13:28 | 0.018011438 | 0,122064713 | 00:13:37 | 0.017916679 | 0,12223293  |
| 00:13:28 | 0.018017728 | 0,122068958 | 00:13:37 | 0.017914007 | 0,122236688 |
| 00:13:28 | 0.018046121 | 0,122075079 | 00:13:37 | 0.017910706 | 0,122240428 |
| 00:13:28 | 0.018042843 | 0,122078747 | 00:13:37 | 0.017907676 | 0,122243938 |
| 00:13:29 | 0.018039986 | 0,12208203  | 00:13:38 | 0.017904732 | 0,122247413 |
| 00:13:29 | 0.01803696  | 0,122085493 | 00:13:38 | 0.017901755 | 0,122251132 |
| 00:13:29 | 0.018034178 | 0,122089064 | 00:13:38 | 0.017898897 | 0,122254694 |
| 00:13:29 | 0.018031156 | 0,122092721 | 00:13:38 | 0.017895814 | 0,122257828 |
| 00:13:29 | 0.01802825  | 0,122096444 | 00:13:38 | 0.017892478 | 0,122261515 |
| 00:13:29 | 0.018025462 | 0,122100103 | 00:13:39 | 0.017889332 | 0,122265337 |
| 00:13:30 | 0.018022251 | 0,12210373  | 00:13:39 | 0.017886976 | 0,122268891 |
| 00:13:30 | 0.018019524 | 0,122107396 | 00:13:39 | 0.017883506 | 0,122272764 |
| 00:13:30 | 0.018016868 | 0,122111248 | 00:13:39 | 0.017880281 | 0,122276367 |
| 00:13:30 | 0.018014001 | 0,122114467 | 00:13:39 | 0.017877733 | 0,122279877 |
| 00:13:30 | 0.018011207 | 0,122118293 | 00:13:40 | 0.017874457 | 0,122283772 |
| 00:13:31 | 0.018008454 | 0,122121699 | 00:13:40 | 0.017871125 | 0,122287271 |
| 00:13:31 | 0.018005237 | 0,122125419 | 00:13:40 | 0.017867771 | 0,122290613 |
| 00:13:31 | 0.018001914 | 0,122128904 | 00:13:40 | 0.017865288 | 0,122293826 |

|          |             |             |          |             |             |
|----------|-------------|-------------|----------|-------------|-------------|
| 00:13:40 | 0.017861834 | 0,122296956 | 00:13:49 | 0.017732063 | 0,122453401 |
| 00:13:41 | 0.017859011 | 0,122300245 | 00:13:50 | 0.017729035 | 0,122456936 |
| 00:13:41 | 0.01785613  | 0,122303528 | 00:13:50 | 0.017726391 | 0,122460382 |
| 00:13:41 | 0.017853584 | 0,122306947 | 00:13:50 | 0.017723513 | 0,122463819 |
| 00:13:41 | 0.017850457 | 0,122310897 | 00:13:50 | 0.017720611 | 0,122467115 |
| 00:13:41 | 0.017847771 | 0,122314065 | 00:13:50 | 0.017717783 | 0,122470336 |
| 00:13:42 | 0.017844807 | 0,122317244 | 00:13:51 | 0.017714836 | 0,122473859 |
| 00:13:42 | 0.017841624 | 0,122320911 | 00:13:51 | 0.017711962 | 0,122477089 |
| 00:13:42 | 0.017838631 | 0,122324291 | 00:13:51 | 0.017709159 | 0,122480408 |
| 00:13:42 | 0.017835636 | 0,122327721 | 00:13:51 | 0.017706092 | 0,122483831 |
| 00:13:42 | 0.017832854 | 0,12233081  | 00:13:51 | 0.017702729 | 0,122486925 |
| 00:13:43 | 0.017829626 | 0,122334228 | 00:13:52 | 0.017699982 | 0,122490536 |
| 00:13:43 | 0.017826806 | 0,122338058 | 00:13:52 | 0.017697065 | 0,122493519 |
| 00:13:43 | 0.017824001 | 0,122341701 | 00:13:52 | 0.017694226 | 0,122496763 |
| 00:13:43 | 0.01782119  | 0,122345189 | 00:13:52 | 0.017690987 | 0,122500414 |
| 00:13:43 | 0.017819098 | 0,122348443 | 00:13:52 | 0.017688197 | 0,122503996 |
| 00:13:44 | 0.017816355 | 0,122351649 | 00:13:53 | 0.017685527 | 0,122507547 |
| 00:13:44 | 0.01781307  | 0,122355017 | 00:13:53 | 0.017683348 | 0,122511023 |
| 00:13:44 | 0.017810343 | 0,122358432 | 00:13:53 | 0.017680643 | 0,12251432  |
| 00:13:44 | 0.01780728  | 0,122361882 | 00:13:53 | 0.017678022 | 0,122517583 |
| 00:13:44 | 0.017804091 | 0,122365377 | 00:13:53 | 0.017675141 | 0,122520729 |
| 00:13:45 | 0.01780133  | 0,122368745 | 00:13:54 | 0.017672105 | 0,122523988 |
| 00:13:45 | 0.017798512 | 0,12237187  | 00:13:54 | 0.017668918 | 0,122527694 |
| 00:13:45 | 0.017795762 | 0,122375154 | 00:13:54 | 0.017666049 | 0,122531252 |
| 00:13:45 | 0.017792967 | 0,1223781   | 00:13:54 | 0.017662803 | 0,122534916 |
| 00:13:45 | 0.017789984 | 0,122381747 | 00:13:54 | 0.017659841 | 0,122538304 |
| 00:13:46 | 0.017787314 | 0,122384872 | 00:13:55 | 0.017656839 | 0,122541661 |
| 00:13:46 | 0.0177847   | 0,122388151 | 00:13:55 | 0.017654099 | 0,122544782 |
| 00:13:46 | 0.01778099  | 0,122391648 | 00:13:55 | 0.017651462 | 0,122548131 |
| 00:13:46 | 0.017778431 | 0,122395196 | 00:13:55 | 0.017648641 | 0,122551191 |
| 00:13:46 | 0.017775881 | 0,122398743 | 00:13:55 | 0.017646008 | 0,122554426 |
| 00:13:47 | 0.017773273 | 0,122402344 | 00:13:56 | 0.017643202 | 0,122557742 |
| 00:13:47 | 0.017770309 | 0,122405859 | 00:13:56 | 0.017640574 | 0,122561141 |
| 00:13:47 | 0.017767169 | 0,122409463 | 00:13:56 | 0.017637697 | 0,122564549 |
| 00:13:47 | 0.017765151 | 0,12241291  | 00:13:56 | 0.017634955 | 0,122567796 |
| 00:13:47 | 0.017762752 | 0,122415605 | 00:13:56 | 0.017632001 | 0,122571074 |
| 00:13:48 | 0.017759635 | 0,122419266 | 00:13:57 | 0.017628811 | 0,12257486  |
| 00:13:48 | 0.017756869 | 0,12242258  | 00:13:57 | 0.017625788 | 0,122577716 |
| 00:13:48 | 0.017754095 | 0,122426076 | 00:13:57 | 0.017623356 | 0,122581268 |
| 00:13:48 | 0.017751342 | 0,122429552 | 00:13:57 | 0.017620722 | 0,122584609 |
| 00:13:48 | 0.017748343 | 0,122432912 | 00:13:57 | 0.017618543 | 0,122587856 |
| 00:13:49 | 0.01774571  | 0,12243665  | 00:13:58 | 0.017615662 | 0,122591475 |
| 00:13:49 | 0.017743144 | 0,12243992  | 00:13:58 | 0.01761281  | 0,122594532 |
| 00:13:49 | 0.017740286 | 0,122443209 | 00:13:58 | 0.017610258 | 0,122598089 |
| 00:13:49 | 0.017737491 | 0,122446509 | 00:13:58 | 0.017607389 | 0,122601313 |
| 00:13:49 | 0.017735187 | 0,122449671 | 00:13:58 | 0.017604646 | 0,122605022 |

|          |             |             |          |             |             |
|----------|-------------|-------------|----------|-------------|-------------|
| 00:13:59 | 0.017601714 | 0,122608484 | 00:14:08 | 0.017474281 | 0,122759091 |
| 00:13:59 | 0.017599179 | 0,122611568 | 00:14:08 | 0.017471708 | 0,122762406 |
| 00:13:59 | 0.017596539 | 0,122614876 | 00:14:08 | 0.017469175 | 0,122765391 |
| 00:13:59 | 0.017593484 | 0,12261791  | 00:14:08 | 0.017466428 | 0,122768831 |
| 00:13:59 | 0.017591026 | 0,122621148 | 00:14:09 | 0.017463768 | 0,122772046 |
| 00:14:00 | 0.017588366 | 0,122624376 | 00:14:09 | 0.01746101  | 0,12277548  |
| 00:14:00 | 0.017585569 | 0,122627314 | 00:14:09 | 0.017458262 | 0,122778614 |
| 00:14:00 | 0.017582912 | 0,122630988 | 00:14:09 | 0.017455607 | 0,122781939 |
| 00:14:00 | 0.017579731 | 0,12263462  | 00:14:09 | 0.017452856 | 0,122785194 |
| 00:14:00 | 0.017577012 | 0,122637918 | 00:14:09 | 0.017450403 | 0,122788713 |
| 00:14:01 | 0.017574535 | 0,122641231 | 00:14:10 | 0.017447493 | 0,122791678 |
| 00:14:01 | 0.01757185  | 0,122644627 | 00:14:10 | 0.017445014 | 0,122795247 |
| 00:14:01 | 0.017569193 | 0,12264778  | 00:14:10 | 0.01744226  | 0,122798702 |
| 00:14:01 | 0.017566352 | 0,122651338 | 00:14:10 | 0.017439815 | 0,122801797 |
| 00:14:01 | 0.017563377 | 0,122654499 | 00:14:10 | 0.017437061 | 0,122805318 |
| 00:14:02 | 0.017560874 | 0,122657934 | 00:14:11 | 0.017434552 | 0,122808565 |
| 00:14:02 | 0.017558131 | 0,122661098 | 00:14:11 | 0.017431964 | 0,122811788 |
| 00:14:02 | 0.017554931 | 0,122664597 | 00:14:11 | 0.017429007 | 0,122815394 |
| 00:14:02 | 0.01755168  | 0,122667626 | 00:14:11 | 0.017426268 | 0,122818378 |
| 00:14:02 | 0.017549206 | 0,122671232 | 00:14:11 | 0.017423633 | 0,122821696 |
| 00:14:03 | 0.017546421 | 0,122674644 | 00:14:12 | 0.017420947 | 0,122824803 |
| 00:14:03 | 0.017543368 | 0,122678125 | 00:14:12 | 0.01741836  | 0,122827844 |
| 00:14:03 | 0.017540294 | 0,122681227 | 00:14:12 | 0.017415277 | 0,122831218 |
| 00:14:03 | 0.017537601 | 0,12268438  | 00:14:12 | 0.017412573 | 0,122834883 |
| 00:14:03 | 0.017535124 | 0,122687444 | 00:14:12 | 0.017410248 | 0,122838072 |
| 00:14:04 | 0.017532727 | 0,122691037 | 00:14:13 | 0.017407509 | 0,122841031 |
| 00:14:04 | 0.017529672 | 0,122694343 | 00:14:13 | 0.017405299 | 0,122844217 |
| 00:14:04 | 0.01752712  | 0,122697214 | 00:14:13 | 0.017402738 | 0,122847375 |
| 00:14:04 | 0.017524051 | 0,122700564 | 00:14:13 | 0.017399967 | 0,122850536 |
| 00:14:04 | 0.017521284 | 0,122704059 | 00:14:13 | 0.01739723  | 0,12285344  |
| 00:14:04 | 0.017518555 | 0,122707525 | 00:14:14 | 0.017394293 | 0,122856534 |
| 00:14:05 | 0.017515858 | 0,122710924 | 00:14:14 | 0.017391657 | 0,122859654 |
| 00:14:05 | 0.017512931 | 0,122714178 | 00:14:14 | 0.017389003 | 0,122862725 |
| 00:14:05 | 0.017510331 | 0,12271726  | 00:14:14 | 0.01738655  | 0,122866071 |
| 00:14:05 | 0.01750709  | 0,122720741 | 00:14:14 | 0.017384103 | 0,122869536 |
| 00:14:05 | 0.017504811 | 0,122723593 | 00:14:14 | 0.017381484 | 0,12287284  |
| 00:14:06 | 0.017501882 | 0,122727174 | 00:14:15 | 0.017378995 | 0,122875976 |
| 00:14:06 | 0.017499038 | 0,122730199 | 00:14:15 | 0.017376643 | 0,122879385 |
| 00:14:06 | 0.01749601  | 0,122733214 | 00:14:15 | 0.017373797 | 0,122882511 |
| 00:14:06 | 0.017492939 | 0,122736631 | 00:14:15 | 0.017371458 | 0,122886185 |
| 00:14:07 | 0.017489954 | 0,122739868 | 00:14:16 | 0.017369    | 0,122889684 |
| 00:14:07 | 0.017486985 | 0,12274333  | 00:14:16 | 0.017365878 | 0,12289286  |
| 00:14:07 | 0.017484015 | 0,12274657  | 00:14:16 | 0.017363195 | 0,122895877 |
| 00:14:07 | 0.017481883 | 0,122749632 | 00:14:16 | 0.017360553 | 0,122899211 |
| 00:14:07 | 0.017479554 | 0,122752861 | 00:14:16 | 0.017357593 | 0,12290237  |
| 00:14:07 | 0.017477182 | 0,122755853 | 00:14:17 | 0.017355033 | 0,122905689 |

|          |             |             |          |             |             |
|----------|-------------|-------------|----------|-------------|-------------|
| 00:14:17 | 0.017352101 | 0,122908859 | 00:14:26 | 0.017229168 | 0,123057026 |
| 00:14:17 | 0.017349312 | 0,122912109 | 00:14:26 | 0.017226403 | 0,123060331 |
| 00:14:17 | 0.01734673  | 0,122915389 | 00:14:26 | 0.017223876 | 0,123063522 |
| 00:14:17 | 0.017344429 | 0,122918637 | 00:14:26 | 0.017221348 | 0,123066724 |
| 00:14:18 | 0.017341904 | 0,122921722 | 00:14:27 | 0.017219092 | 0,123070272 |
| 00:14:18 | 0.017339481 | 0,122924675 | 00:14:27 | 0.017216768 | 0,123073769 |
| 00:14:18 | 0.017336522 | 0,12292735  | 00:14:27 | 0.01721459  | 0,123076855 |
| 00:14:18 | 0.017333623 | 0,122930408 | 00:14:27 | 0.017211451 | 0,123079898 |
| 00:14:18 | 0.017330915 | 0,122933623 | 00:14:27 | 0.017208523 | 0,123083039 |
| 00:14:19 | 0.017328112 | 0,122936876 | 00:14:28 | 0.017205813 | 0,123086187 |
| 00:14:19 | 0.017325045 | 0,1229404   | 00:14:28 | 0.01720346  | 0,123089393 |
| 00:14:19 | 0.017322764 | 0,122943641 | 00:14:28 | 0.01720067  | 0,123092628 |
| 00:14:19 | 0.017319897 | 0,122946986 | 00:14:28 | 0.017197687 | 0,123095683 |
| 00:14:19 | 0.01731749  | 0,12295062  | 00:14:28 | 0.017195001 | 0,123098787 |
| 00:14:20 | 0.017314672 | 0,122953785 | 00:14:29 | 0.017192442 | 0,123101943 |
| 00:14:20 | 0.017312125 | 0,122957332 | 00:14:29 | 0.017189488 | 0,123104969 |
| 00:14:20 | 0.017309226 | 0,122960666 | 00:14:29 | 0.017186786 | 0,123108355 |
| 00:14:20 | 0.017306749 | 0,122964021 | 00:14:29 | 0.017184229 | 0,123111378 |
| 00:14:20 | 0.017303753 | 0,12296747  | 00:14:29 | 0.017181746 | 0,123114296 |
| 00:14:21 | 0.017301648 | 0,122971    | 00:14:30 | 0.017179087 | 0,12311749  |
| 00:14:21 | 0.017298884 | 0,122974641 | 00:14:30 | 0.0171763   | 0,123120617 |
| 00:14:21 | 0.017296938 | 0,122977783 | 00:14:30 | 0.017173594 | 0,123123906 |
| 00:14:21 | 0.017294374 | 0,122981145 | 00:14:30 | 0.017170873 | 0,12312691  |
| 00:14:21 | 0.017291629 | 0,12298425  | 00:14:30 | 0.017167942 | 0,123130131 |
| 00:14:22 | 0.017288954 | 0,122987305 | 00:14:31 | 0.017165108 | 0,123133064 |
| 00:14:22 | 0.01728588  | 0,122990659 | 00:14:31 | 0.01716309  | 0,123136229 |
| 00:14:22 | 0.017283225 | 0,122994005 | 00:14:31 | 0.017160297 | 0,123139302 |
| 00:14:22 | 0.017280456 | 0,122996873 | 00:14:31 | 0.017157551 | 0,123142334 |
| 00:14:22 | 0.01727825  | 0,122999754 | 00:14:31 | 0.017155112 | 0,123145385 |
| 00:14:23 | 0.017275797 | 0,123003387 | 00:14:32 | 0.017152182 | 0,123148792 |
| 00:14:23 | 0.01727289  | 0,12300663  | 00:14:32 | 0.017149631 | 0,123151885 |
| 00:14:23 | 0.017269863 | 0,123009482 | 00:14:32 | 0.017146961 | 0,123154994 |
| 00:14:23 | 0.017267277 | 0,123012396 | 00:14:32 | 0.017144199 | 0,123158129 |
| 00:14:23 | 0.01726434  | 0,123015477 | 00:14:32 | 0.017141526 | 0,123161499 |
| 00:14:24 | 0.017261521 | 0,123018753 | 00:14:33 | 0.017139183 | 0,123164554 |
| 00:14:24 | 0.017258901 | 0,123022044 | 00:14:33 | 0.017136987 | 0,123167671 |
| 00:14:24 | 0.017256405 | 0,123025144 | 00:14:33 | 0.017134189 | 0,123171305 |
| 00:14:24 | 0.017253889 | 0,123028309 | 00:14:33 | 0.01713119  | 0,123174433 |
| 00:14:24 | 0.017250886 | 0,123031523 | 00:14:33 | 0.017128477 | 0,123177705 |
| 00:14:24 | 0.017247939 | 0,123034734 | 00:14:34 | 0.017125679 | 0,123181066 |
| 00:14:25 | 0.017244965 | 0,123037833 | 00:14:34 | 0.017123604 | 0,123184175 |
| 00:14:25 | 0.0172421   | 0,123041025 | 00:14:34 | 0.017121334 | 0,123187379 |
| 00:14:25 | 0.01723961  | 0,123044445 | 00:14:34 | 0.017118468 | 0,123190666 |
| 00:14:25 | 0.017237074 | 0,123047726 | 00:14:34 | 0.017115806 | 0,123194001 |
| 00:14:25 | 0.017234378 | 0,123050884 | 00:14:35 | 0.017113573 | 0,123197007 |
| 00:14:26 | 0.017231931 | 0,123054026 | 00:14:35 | 0.017110534 | 0,123200196 |

|          |             |             |          |             |             |
|----------|-------------|-------------|----------|-------------|-------------|
| 00:14:35 | 0.017107966 | 0,123203624 | 00:14:44 | 0.016988781 | 0,1233486   |
| 00:14:35 | 0.017105888 | 0,123206856 | 00:14:44 | 0.016986152 | 0,123351634 |
| 00:14:35 | 0.017103548 | 0,123209837 | 00:14:44 | 0.016983443 | 0,123354864 |
| 00:14:36 | 0.017100668 | 0,123213092 | 00:14:45 | 0.016981296 | 0,123358119 |
| 00:14:36 | 0.017097955 | 0,123216348 | 00:14:45 | 0.016978881 | 0,123361208 |
| 00:14:36 | 0.017095129 | 0,123219521 | 00:14:45 | 0.01697567  | 0,123363986 |
| 00:14:36 | 0.017092589 | 0,123222509 | 00:14:45 | 0.016973114 | 0,12336714  |
| 00:14:36 | 0.017090439 | 0,123225783 | 00:14:45 | 0.016970703 | 0,123370212 |
| 00:14:37 | 0.017088254 | 0,123228937 | 00:14:46 | 0.016967931 | 0,123373429 |
| 00:14:37 | 0.017085724 | 0,123232147 | 00:14:46 | 0.01696538  | 0,123376411 |
| 00:14:37 | 0.017083221 | 0,123235463 | 00:14:46 | 0.016962503 | 0,12337932  |
| 00:14:37 | 0.017080562 | 0,123238303 | 00:14:46 | 0.016960262 | 0,123382504 |
| 00:14:37 | 0.017078306 | 0,123241332 | 00:14:46 | 0.016957518 | 0,123385577 |
| 00:14:38 | 0.017075551 | 0,123244325 | 00:14:47 | 0.016954913 | 0,123388657 |
| 00:14:38 | 0.017072625 | 0,123246978 | 00:14:47 | 0.016952226 | 0,123391949 |
| 00:14:38 | 0.017070276 | 0,123250545 | 00:14:47 | 0.016949911 | 0,123394968 |
| 00:14:38 | 0.017067657 | 0,123254061 | 00:14:47 | 0.016947136 | 0,123397824 |
| 00:14:38 | 0.017064828 | 0,123257026 | 00:14:47 | 0.016944345 | 0,123400887 |
| 00:14:38 | 0.017061967 | 0,123260702 | 00:14:48 | 0.01694165  | 0,123404036 |
| 00:14:39 | 0.017059333 | 0,123263909 | 00:14:48 | 0.016938968 | 0,123406635 |
| 00:14:39 | 0.017056941 | 0,123267224 | 00:14:48 | 0.016936552 | 0,123409892 |
| 00:14:39 | 0.017054333 | 0,123270396 | 00:14:48 | 0.016934597 | 0,123413516 |
| 00:14:39 | 0.017051512 | 0,123273577 | 00:14:48 | 0.016932278 | 0,123417072 |
| 00:14:39 | 0.017049055 | 0,123276659 | 00:14:49 | 0.016929612 | 0,123420111 |
| 00:14:40 | 0.017045994 | 0,123279525 | 00:14:49 | 0.016927267 | 0,123422866 |
| 00:14:40 | 0.017043192 | 0,123282979 | 00:14:49 | 0.016924746 | 0,123425362 |
| 00:14:40 | 0.01704034  | 0,123285979 | 00:14:49 | 0.016922276 | 0,123428516 |
| 00:14:40 | 0.017037157 | 0,123289187 | 00:14:49 | 0.016920004 | 0,123431552 |
| 00:14:40 | 0.017034924 | 0,1232921   | 00:14:50 | 0.016917225 | 0,123434751 |
| 00:14:41 | 0.017032331 | 0,123295485 | 00:14:50 | 0.016915018 | 0,123437657 |
| 00:14:41 | 0.017029708 | 0,123298069 | 00:14:50 | 0.016912402 | 0,123440563 |
| 00:14:41 | 0.017027133 | 0,123301214 | 00:14:50 | 0.016909858 | 0,123443558 |
| 00:14:41 | 0.017024605 | 0,123304426 | 00:14:50 | 0.01690742  | 0,1234465   |
| 00:14:41 | 0.017022035 | 0,123307497 | 00:14:51 | 0.016905133 | 0,123449406 |
| 00:14:42 | 0.017019508 | 0,123310554 | 00:14:51 | 0.016902739 | 0,123452578 |
| 00:14:42 | 0.017016863 | 0,123313728 | 00:14:51 | 0.01690025  | 0,123455684 |
| 00:14:42 | 0.017014372 | 0,123316798 | 00:14:51 | 0.016897676 | 0,123458921 |
| 00:14:42 | 0.017011725 | 0,123319738 | 00:14:51 | 0.016895427 | 0,123462338 |
| 00:14:42 | 0.017008732 | 0,12332296  | 00:14:52 | 0.016892652 | 0,123465294 |
| 00:14:43 | 0.017006291 | 0,123326027 | 00:14:52 | 0.016890433 | 0,123468426 |
| 00:14:43 | 0.017004103 | 0,123329232 | 00:14:52 | 0.016887802 | 0,123471491 |
| 00:14:43 | 0.017001013 | 0,123332656 | 00:14:52 | 0.016885435 | 0,123474154 |
| 00:14:43 | 0.016998763 | 0,12333581  | 00:14:52 | 0.016883095 | 0,123477364 |
| 00:14:44 | 0.016996464 | 0,123339099 | 00:14:53 | 0.016880567 | 0,123480524 |
| 00:14:44 | 0.016994012 | 0,123342084 | 00:14:53 | 0.01687795  | 0,123483596 |
| 00:14:44 | 0.016991623 | 0,123345261 | 00:14:53 | 0.016875607 | 0,123486895 |

|          |             |             |          |             |             |
|----------|-------------|-------------|----------|-------------|-------------|
| 00:14:53 | 0.016872717 | 0,123489891 | 00:15:02 | 0.016758124 | 0,123631016 |
| 00:14:53 | 0.016870004 | 0,123493068 | 00:15:02 | 0.016755084 | 0,123634149 |
| 00:14:54 | 0.016867723 | 0,123496036 | 00:15:03 | 0.016752756 | 0,123637311 |
| 00:14:54 | 0.016865409 | 0,123498915 | 00:15:03 | 0.016750534 | 0,123640303 |
| 00:14:54 | 0.016862947 | 0,123502229 | 00:15:03 | 0.016747858 | 0,123643169 |
| 00:14:54 | 0.016860283 | 0,123505388 | 00:15:03 | 0.016745199 | 0,123646235 |
| 00:14:54 | 0.016857708 | 0,123508405 | 00:15:03 | 0.016743071 | 0,123649162 |
| 00:14:55 | 0.016855146 | 0,123511572 | 00:15:04 | 0.016740638 | 0,123652395 |
| 00:14:55 | 0.016852498 | 0,12351477  | 00:15:04 | 0.016738286 | 0,123655592 |
| 00:14:55 | 0.016850124 | 0,123517727 | 00:15:04 | 0.016736068 | 0,123658573 |
| 00:14:55 | 0.016847533 | 0,123520467 | 00:15:04 | 0.016733552 | 0,123661702 |
| 00:14:55 | 0.016845081 | 0,123523537 | 00:15:04 | 0.016731167 | 0,123664864 |
| 00:14:56 | 0.016842648 | 0,123526584 | 00:15:05 | 0.016728633 | 0,123667883 |
| 00:14:56 | 0.016839496 | 0,12352965  | 00:15:05 | 0.016726206 | 0,123670743 |
| 00:14:56 | 0.016836701 | 0,123532983 | 00:15:05 | 0.016723709 | 0,123673607 |
| 00:14:56 | 0.016834767 | 0,123536217 | 00:15:05 | 0.016720966 | 0,12367654  |
| 00:14:56 | 0.016832474 | 0,123539328 | 00:15:05 | 0.016718919 | 0,123679592 |
| 00:14:56 | 0.016830291 | 0,123542188 | 00:15:06 | 0.016715807 | 0,123681984 |
| 00:14:57 | 0.016827729 | 0,123545106 | 00:15:06 | 0.016713581 | 0,123685063 |
| 00:14:57 | 0.016824971 | 0,123548125 | 00:15:06 | 0.016711461 | 0,123687972 |
| 00:14:57 | 0.016822547 | 0,123551149 | 00:15:06 | 0.016709354 | 0,123690639 |
| 00:14:57 | 0.016820186 | 0,123554033 | 00:15:06 | 0.016706951 | 0,123693709 |
| 00:14:58 | 0.016817538 | 0,12355704  | 00:15:07 | 0.016704153 | 0,123696492 |
| 00:14:58 | 0.016814812 | 0,123560132 | 00:15:07 | 0.016701598 | 0,12369957  |
| 00:14:58 | 0.016812077 | 0,123563404 | 00:15:07 | 0.016699382 | 0,123702581 |
| 00:14:58 | 0.016810051 | 0,123566467 | 00:15:07 | 0.016696982 | 0,123705617 |
| 00:14:58 | 0.016807466 | 0,123569674 | 00:15:07 | 0.016694639 | 0,123708693 |
| 00:14:59 | 0.016804931 | 0,123572725 | 00:15:08 | 0.01669194  | 0,123711622 |
| 00:14:59 | 0.016802349 | 0,123575975 | 00:15:08 | 0.016689478 | 0,123714496 |
| 00:14:59 | 0.016799948 | 0,123578999 | 00:15:08 | 0.016687463 | 0,12371712  |
| 00:14:59 | 0.016797336 | 0,123581856 | 00:15:08 | 0.016685022 | 0,123719911 |
| 00:14:59 | 0.016794763 | 0,123585194 | 00:15:08 | 0.016683047 | 0,123722994 |
| 00:14:59 | 0.016792071 | 0,123588534 | 00:15:09 | 0.016680539 | 0,123726232 |
| 00:15:00 | 0.016789452 | 0,123591258 | 00:15:09 | 0.016678066 | 0,123729533 |
| 00:15:00 | 0.016787019 | 0,123594216 | 00:15:09 | 0.016675609 | 0,123732521 |
| 00:15:00 | 0.01678486  | 0,123597297 | 00:15:09 | 0.016673087 | 0,123735264 |
| 00:15:00 | 0.016782722 | 0,123600736 | 00:15:09 | 0.016670479 | 0,123738008 |
| 00:15:00 | 0.01678052  | 0,123603706 | 00:15:10 | 0.01666799  | 0,123740736 |
| 00:15:01 | 0.016778118 | 0,123606683 | 00:15:10 | 0.016665328 | 0,123743452 |
| 00:15:01 | 0.016775634 | 0,123609872 | 00:15:10 | 0.016663053 | 0,123746433 |
| 00:15:01 | 0.016773264 | 0,123612857 | 00:15:10 | 0.01666036  | 0,123749238 |
| 00:15:01 | 0.016770737 | 0,123615676 | 00:15:10 | 0.016658333 | 0,123752116 |
| 00:15:01 | 0.016768592 | 0,123618661 | 00:15:11 | 0.016656427 | 0,123754896 |
| 00:15:02 | 0.016766108 | 0,12362186  | 00:15:11 | 0.016653846 | 0,123757977 |
| 00:15:02 | 0.016763691 | 0,123624976 | 00:15:11 | 0.016651561 | 0,123760968 |
| 00:15:02 | 0.016760801 | 0,123627914 | 00:15:11 | 0.016649815 | 0,123763969 |

|          |             |             |          |             |             |
|----------|-------------|-------------|----------|-------------|-------------|
| 00:15:11 | 0.016647271 | 0,123767091 | 00:15:20 | 0.016538488 | 0,123901685 |
| 00:15:12 | 0.016644411 | 0,123769336 | 00:15:21 | 0.016536235 | 0,123904426 |
| 00:15:12 | 0.016641892 | 0,123772056 | 00:15:21 | 0.016534147 | 0,123907267 |
| 00:15:12 | 0.016639557 | 0,123774984 | 00:15:21 | 0.016531593 | 0,123910177 |
| 00:15:12 | 0.016637679 | 0,12377806  | 00:15:21 | 0.016528682 | 0,123913348 |
| 00:15:12 | 0.016635391 | 0,123780891 | 00:15:21 | 0.016526267 | 0,123916322 |
| 00:15:13 | 0.016632847 | 0,123783597 | 00:15:22 | 0.016523607 | 0,12391914  |
| 00:15:13 | 0.016630474 | 0,123786427 | 00:15:22 | 0.016521218 | 0,123922025 |
| 00:15:13 | 0.016628157 | 0,123789479 | 00:15:22 | 0.016518872 | 0,123925356 |
| 00:15:13 | 0.0166258   | 0,123792423 | 00:15:22 | 0.01651677  | 0,123928149 |
| 00:15:13 | 0.016623531 | 0,123795262 | 00:15:22 | 0.016514139 | 0,123931014 |
| 00:15:14 | 0.016621131 | 0,123798105 | 00:15:23 | 0.016511387 | 0,123933754 |
| 00:15:14 | 0.016618459 | 0,123801289 | 00:15:23 | 0.016509246 | 0,123936635 |
| 00:15:14 | 0.016616558 | 0,123804299 | 00:15:23 | 0.016506935 | 0,123939592 |
| 00:15:14 | 0.016614066 | 0,123807561 | 00:15:23 | 0.016504568 | 0,123942322 |
| 00:15:14 | 0.016611607 | 0,12381028  | 00:15:23 | 0.016502239 | 0,123945088 |
| 00:15:14 | 0.016608869 | 0,123813291 | 00:15:24 | 0.01649962  | 0,123947966 |
| 00:15:15 | 0.01660651  | 0,123816517 | 00:15:24 | 0.016497231 | 0,12395071  |
| 00:15:15 | 0.016604167 | 0,123819416 | 00:15:24 | 0.016494969 | 0,123954037 |
| 00:15:15 | 0.016602058 | 0,123822185 | 00:15:24 | 0.016492886 | 0,123957031 |
| 00:15:15 | 0.016599735 | 0,123825188 | 00:15:24 | 0.016490624 | 0,123960128 |
| 00:15:15 | 0.016597563 | 0,123828202 | 00:15:25 | 0.01648838  | 0,123962996 |
| 00:15:16 | 0.016595473 | 0,123831616 | 00:15:25 | 0.016486125 | 0,123966178 |
| 00:15:16 | 0.01659319  | 0,123834539 | 00:15:25 | 0.016483465 | 0,123969031 |
| 00:15:16 | 0.016590515 | 0,123837619 | 00:15:25 | 0.016481232 | 0,123972136 |
| 00:15:16 | 0.016588062 | 0,123840795 | 00:15:25 | 0.016478251 | 0,123974999 |
| 00:15:17 | 0.016585599 | 0,123843846 | 00:15:26 | 0.016476001 | 0,123978083 |
| 00:15:17 | 0.016583431 | 0,123846692 | 00:15:26 | 0.016473144 | 0,123981303 |
| 00:15:17 | 0.016581045 | 0,123849501 | 00:15:26 | 0.016470487 | 0,123984165 |
| 00:15:17 | 0.016579122 | 0,123852308 | 00:15:26 | 0.016467797 | 0,123986853 |
| 00:15:17 | 0.01657638  | 0,123855446 | 00:15:26 | 0.016465392 | 0,123989748 |
| 00:15:17 | 0.016574565 | 0,123858243 | 00:15:27 | 0.016462998 | 0,123992863 |
| 00:15:18 | 0.016572504 | 0,123861017 | 00:15:27 | 0.016460738 | 0,12399569  |
| 00:15:18 | 0.016570173 | 0,12386414  | 00:15:27 | 0.016458544 | 0,123998576 |
| 00:15:18 | 0.016567565 | 0,123866985 | 00:15:27 | 0.016456292 | 0,124001544 |
| 00:15:18 | 0.016564639 | 0,12387028  | 00:15:27 | 0.01645628  | 0,124004795 |
| 00:15:19 | 0.016562414 | 0,123873288 | 00:15:28 | 0.016452411 | 0,124007328 |
| 00:15:19 | 0.016560107 | 0,123876343 | 00:15:28 | 0.016451572 | 0,124010251 |
| 00:15:19 | 0.016557811 | 0,123879007 | 00:15:28 | 0.016447668 | 0,124013111 |
| 00:15:19 | 0.016555396 | 0,123881817 | 00:15:28 | 0.016447253 | 0,124016214 |
| 00:15:19 | 0.016553198 | 0,123884796 | 00:15:28 | 0.016447297 | 0,124019323 |
| 00:15:19 | 0.016550563 | 0,123887642 | 00:15:29 | 0.016444988 | 0,124022277 |
| 00:15:20 | 0.016548328 | 0,123890542 | 00:15:29 | 0.016444808 | 0,124025285 |
| 00:15:20 | 0.016546199 | 0,123893354 | 00:15:29 | 0.016442459 | 0,124028077 |
| 00:15:20 | 0.016543417 | 0,123896271 | 00:15:29 | 0.016441228 | 0,124031132 |
| 00:15:20 | 0.016540901 | 0,12389892  | 00:15:29 | 0.016439081 | 0,124034075 |

|          |             |             |          |             |             |
|----------|-------------|-------------|----------|-------------|-------------|
| 00:15:30 | 0.01643542  | 0,124036852 | 00:15:39 | 0.016340938 | 0,124168714 |
| 00:15:30 | 0.016431467 | 0,124039495 | 00:15:39 | 0.016337437 | 0,124171293 |
| 00:15:30 | 0.016429156 | 0,124042008 | 00:15:39 | 0.016335085 | 0,124173789 |
| 00:15:30 | 0.016426659 | 0,124044936 | 00:15:39 | 0.016335217 | 0,124176974 |
| 00:15:30 | 0.016423222 | 0,124047784 | 00:15:39 | 0.016334371 | 0,124180167 |
| 00:15:31 | 0.016421335 | 0,124050848 | 00:15:40 | 0.016331971 | 0,124183236 |
| 00:15:31 | 0.0164202   | 0,124053686 | 00:15:40 | 0.016331079 | 0,124186058 |
| 00:15:31 | 0.01641901  | 0,124056458 | 00:15:40 | 0.016328551 | 0,124188824 |
| 00:15:31 | 0.016416684 | 0,124059392 | 00:15:40 | 0.016326745 | 0,124191825 |
| 00:15:31 | 0.016414434 | 0,124062109 | 00:15:40 | 0.016325902 | 0,124194909 |
| 00:15:32 | 0.016413802 | 0,124065351 | 00:15:41 | 0.016323515 | 0,124197834 |
| 00:15:32 | 0.016413513 | 0,124068346 | 00:15:41 | 0.016321874 | 0,124200422 |
| 00:15:32 | 0.016410002 | 0,124071003 | 00:15:41 | 0.016319294 | 0,124203227 |
| 00:15:32 | 0.016409379 | 0,124073971 | 00:15:41 | 0.01631414  | 0,124205901 |
| 00:15:32 | 0.016408892 | 0,124077333 | 00:15:41 | 0.016312112 | 0,124208882 |
| 00:15:33 | 0.016406439 | 0,12408041  | 00:15:42 | 0.016311194 | 0,124211723 |
| 00:15:33 | 0.016404611 | 0,124083387 | 00:15:42 | 0.016309418 | 0,124214841 |
| 00:15:33 | 0.016403786 | 0,124086286 | 00:15:42 | 0.016306507 | 0,124217822 |
| 00:15:33 | 0.016403432 | 0,124089536 | 00:15:42 | 0.01630351  | 0,124220725 |
| 00:15:33 | 0.016402036 | 0,124092337 | 00:15:42 | 0.016299793 | 0,124223464 |
| 00:15:34 | 0.016400703 | 0,124095233 | 00:15:43 | 0.016298516 | 0,124226466 |
| 00:15:34 | 0.016398107 | 0,124097806 | 00:15:43 | 0.016297093 | 0,124229568 |
| 00:15:34 | 0.016394577 | 0,124100456 | 00:15:43 | 0.016292905 | 0,124232514 |
| 00:15:34 | 0.016391454 | 0,124102824 | 00:15:43 | 0.016292152 | 0,124235402 |
| 00:15:34 | 0.016390426 | 0,124105653 | 00:15:43 | 0.016289705 | 0,124238322 |
| 00:15:34 | 0.016391362 | 0,124108922 | 00:15:44 | 0.016287113 | 0,124241026 |
| 00:15:35 | 0.016390959 | 0,124111772 | 00:15:44 | 0.016287692 | 0,124244383 |
| 00:15:35 | 0.016387539 | 0,124114512 | 00:15:44 | 0.01628615  | 0,124247309 |
| 00:15:35 | 0.016385277 | 0,124117536 | 00:15:44 | 0.016283918 | 0,124249926 |
| 00:15:35 | 0.016384741 | 0,124120363 | 00:15:44 | 0.016279925 | 0,124252763 |
| 00:15:35 | 0.016381339 | 0,124123155 | 00:15:45 | 0.016279359 | 0,124255837 |
| 00:15:36 | 0.01638027  | 0,124126187 | 00:15:45 | 0.016278212 | 0,124258765 |
| 00:15:36 | 0.016376324 | 0,124128752 | 00:15:45 | 0.016280407 | 0,1242621   |
| 00:15:36 | 0.016374844 | 0,124131752 | 00:15:45 | 0.016277908 | 0,124265105 |
| 00:15:36 | 0.016371322 | 0,124134801 | 00:15:45 | 0.016274304 | 0,124267597 |
| 00:15:36 | 0.016368538 | 0,124137386 | 00:15:46 | 0.016270761 | 0,124270019 |
| 00:15:37 | 0.016365773 | 0,124140328 | 00:15:46 | 0.016265857 | 0,124272581 |
| 00:15:37 | 0.016364226 | 0,124143121 | 00:15:46 | 0.016264759 | 0,124275555 |
| 00:15:37 | 0.016360548 | 0,124145697 | 00:15:46 | 0.01626289  | 0,124278435 |
| 00:15:37 | 0.016358772 | 0,124148546 | 00:15:46 | 0.016259718 | 0,124281126 |
| 00:15:37 | 0.016356497 | 0,124151497 | 00:15:47 | 0.016254755 | 0,124283798 |
| 00:15:38 | 0.016353205 | 0,12415456  | 00:15:47 | 0.016253095 | 0,124286612 |
| 00:15:38 | 0.016351319 | 0,124157569 | 00:15:47 | 0.016250162 | 0,124289222 |
| 00:15:38 | 0.016349324 | 0,124160357 | 00:15:47 | 0.016248142 | 0,124291919 |
| 00:15:38 | 0.016346596 | 0,124163025 | 00:15:47 | 0.016246974 | 0,124294856 |
| 00:15:38 | 0.016342534 | 0,124165792 | 00:15:47 | 0.016243656 | 0,124297762 |

|          |             |             |          |             |             |
|----------|-------------|-------------|----------|-------------|-------------|
| 00:15:48 | 0.016241305 | 0,124300409 | 00:15:57 | 0.016162053 | 0,12443338  |
| 00:15:48 | 0.016238144 | 0,12430293  | 00:15:57 | 0.016161936 | 0,124436523 |
| 00:15:48 | 0.016236096 | 0,124306026 | 00:15:57 | 0.016161448 | 0,12443943  |
| 00:15:48 | 0.016234341 | 0,1243088   | 00:15:57 | 0.016159468 | 0,124442013 |
| 00:15:49 | 0.016231529 | 0,124311562 | 00:15:58 | 0.016158779 | 0,124444836 |
| 00:15:49 | 0.016230951 | 0,124314758 | 00:15:58 | 0.016157316 | 0,124447637 |
| 00:15:49 | 0.016229291 | 0,12431765  | 00:15:58 | 0.016155242 | 0,124450476 |
| 00:15:49 | 0.016227522 | 0,12432025  | 00:15:58 | 0.016152151 | 0,124453008 |
| 00:15:49 | 0.016225168 | 0,12432311  | 00:15:58 | 0.016148415 | 0,124455738 |
| 00:15:49 | 0.016223192 | 0,12432606  | 00:15:59 | 0.016146683 | 0,124458282 |
| 00:15:50 | 0.016220768 | 0,124328995 | 00:15:59 | 0.016144775 | 0,12446104  |
| 00:15:50 | 0.016220319 | 0,124332084 | 00:15:59 | 0.016141734 | 0,12446367  |
| 00:15:50 | 0.016221547 | 0,124335221 | 00:15:59 | 0.016141571 | 0,124466693 |
| 00:15:50 | 0.016220127 | 0,124337937 | 00:15:59 | 0.016139867 | 0,124469403 |
| 00:15:51 | 0.016218474 | 0,124340738 | 00:16:00 | 0.016138748 | 0,124472585 |
| 00:15:51 | 0.016217568 | 0,124343546 | 00:16:00 | 0.016137873 | 0,124475702 |
| 00:15:51 | 0.016215012 | 0,124345874 | 00:16:00 | 0.016137573 | 0,124478555 |
| 00:15:51 | 0.016213279 | 0,124348975 | 00:16:00 | 0.016137525 | 0,124481602 |
| 00:15:51 | 0.016208943 | 0,124351645 | 00:16:00 | 0.016134794 | 0,124484133 |
| 00:15:51 | 0.016206977 | 0,124354443 | 00:16:01 | 0.016131978 | 0,124486834 |
| 00:15:52 | 0.016206627 | 0,124357552 | 00:16:01 | 0.016130788 | 0,124489598 |
| 00:15:52 | 0.016205728 | 0,12436071  | 00:16:01 | 0.016129773 | 0,12449222  |
| 00:15:52 | 0.016203167 | 0,12436375  | 00:16:01 | 0.016128573 | 0,12449458  |
| 00:15:52 | 0.016200015 | 0,124366844 | 00:16:01 | 0.016126746 | 0,124497342 |
| 00:15:52 | 0.016198542 | 0,124369735 | 00:16:02 | 0.016124802 | 0,124500428 |
| 00:15:53 | 0.016195054 | 0,124372087 | 00:16:02 | 0.016122322 | 0,124503465 |
| 00:15:53 | 0.016192393 | 0,12437489  | 00:16:02 | 0.016120563 | 0,124506337 |
| 00:15:53 | 0.01619259  | 0,12437793  | 00:16:02 | 0.016119725 | 0,124509219 |
| 00:15:53 | 0.016191783 | 0,124380756 | 00:16:02 | 0.016117491 | 0,124512184 |
| 00:15:53 | 0.016189898 | 0,124383878 | 00:16:03 | 0.016115562 | 0,124515055 |
| 00:15:54 | 0.016189423 | 0,124386799 | 00:16:03 | 0.016111777 | 0,124517824 |
| 00:15:54 | 0.016186808 | 0,12438932  | 00:16:03 | 0.016110598 | 0,124520445 |
| 00:15:54 | 0.016187485 | 0,124392634 | 00:16:03 | 0.016107045 | 0,124522752 |
| 00:15:54 | 0.016185013 | 0,124395341 | 00:16:03 | 0.016105783 | 0,124525463 |
| 00:15:54 | 0.016185426 | 0,124398314 | 00:16:04 | 0.016103778 | 0,124528192 |
| 00:15:55 | 0.016183364 | 0,124401101 | 00:16:04 | 0.01610206  | 0,124530902 |
| 00:15:55 | 0.016180836 | 0,124403742 | 00:16:04 | 0.016102232 | 0,124533631 |
| 00:15:55 | 0.016179832 | 0,124406684 | 00:16:04 | 0.016100746 | 0,124536594 |
| 00:15:55 | 0.01617724  | 0,124409633 | 00:16:04 | 0.016097937 | 0,124539303 |
| 00:15:55 | 0.016174619 | 0,124412733 | 00:16:04 | 0.016096809 | 0,124542412 |
| 00:15:56 | 0.016171927 | 0,124415854 | 00:16:05 | 0.016095742 | 0,124545182 |
| 00:15:56 | 0.016170387 | 0,124419237 | 00:16:05 | 0.016094445 | 0,124548007 |
| 00:15:56 | 0.016167183 | 0,124422044 | 00:16:05 | 0.016092491 | 0,124550668 |
| 00:15:56 | 0.016166219 | 0,124424971 | 00:16:05 | 0.016091578 | 0,124553703 |
| 00:15:56 | 0.01616624  | 0,124427877 | 00:16:06 | 0.016089141 | 0,124556187 |
| 00:15:57 | 0.016164286 | 0,124430596 | 00:16:06 | 0.016088316 | 0,124559277 |

|          |             |             |          |             |             |
|----------|-------------|-------------|----------|-------------|-------------|
| 00:16:06 | 0.01608651  | 0,124562127 | 00:16:15 | 0.016023506 | 0,124687939 |
| 00:16:06 | 0.0160858   | 0,124565232 | 00:16:15 | 0.016019676 | 0,124690484 |
| 00:16:06 | 0.016084572 | 0,124567776 | 00:16:15 | 0.016017925 | 0,124693392 |
| 00:16:07 | 0.016084882 | 0,124570691 | 00:16:16 | 0.016017042 | 0,124696209 |
| 00:16:07 | 0.016081051 | 0,124573128 | 00:16:16 | 0.01601513  | 0,124698509 |
| 00:16:07 | 0.016080125 | 0,124575984 | 00:16:16 | 0.016013261 | 0,124701236 |
| 00:16:07 | 0.016077139 | 0,124578627 | 00:16:16 | 0.016011092 | 0,124704    |
| 00:16:07 | 0.016074803 | 0,124581381 | 00:16:16 | 0.016009527 | 0,124706653 |
| 00:16:07 | 0.016076475 | 0,124584505 | 00:16:17 | 0.016006024 | 0,124709082 |
| 00:16:08 | 0.016074351 | 0,124587199 | 00:16:17 | 0.016005185 | 0,124711836 |
| 00:16:08 | 0.016073774 | 0,124589653 | 00:16:17 | 0.016003333 | 0,124714553 |
| 00:16:08 | 0.016072683 | 0,124592201 | 00:16:17 | 0.016000901 | 0,124717145 |
| 00:16:08 | 0.016071931 | 0,124595189 | 00:16:17 | 0.016001227 | 0,124719921 |
| 00:16:08 | 0.016072237 | 0,124598152 | 00:16:18 | 0.016001329 | 0,124722655 |
| 00:16:09 | 0.016071063 | 0,124601038 | 00:16:18 | 0.016000134 | 0,124725516 |
| 00:16:09 | 0.016068374 | 0,124603557 | 00:16:18 | 0.015999459 | 0,124728483 |
| 00:16:09 | 0.016066163 | 0,124606551 | 00:16:18 | 0.015995484 | 0,124731178 |
| 00:16:09 | 0.016065418 | 0,124608858 | 00:16:18 | 0.015993679 | 0,124733864 |
| 00:16:10 | 0.016063103 | 0,124611997 | 00:16:19 | 0.015991544 | 0,124736463 |
| 00:16:10 | 0.016059524 | 0,124614463 | 00:16:19 | 0.015989626 | 0,124739216 |
| 00:16:10 | 0.016058148 | 0,124616913 | 00:16:19 | 0.015991334 | 0,12474204  |
| 00:16:10 | 0.016057471 | 0,124619845 | 00:16:19 | 0.015990599 | 0,124744981 |
| 00:16:10 | 0.016057067 | 0,124622531 | 00:16:19 | 0.015991204 | 0,12474802  |
| 00:16:10 | 0.016054523 | 0,124625049 | 00:16:20 | 0.015988996 | 0,124750679 |
| 00:16:11 | 0.016055085 | 0,124627775 | 00:16:20 | 0.015984898 | 0,124753164 |
| 00:16:11 | 0.016052132 | 0,1246302   | 00:16:20 | 0.015982049 | 0,124755713 |
| 00:16:11 | 0.016051801 | 0,124633054 | 00:16:20 | 0.015979664 | 0,12475854  |
| 00:16:11 | 0.016051366 | 0,124636001 | 00:16:20 | 0.0159745   | 0,124760462 |
| 00:16:11 | 0.016049164 | 0,124638331 | 00:16:21 | 0.015971555 | 0,1247631   |
| 00:16:12 | 0.016052292 | 0,124641785 | 00:16:21 | 0.01596933  | 0,124765754 |
| 00:16:12 | 0.016052065 | 0,12464473  | 00:16:21 | 0.015966882 | 0,124768264 |
| 00:16:12 | 0.016050277 | 0,124647336 | 00:16:21 | 0.015964128 | 0,124770805 |
| 00:16:12 | 0.016047041 | 0,124649605 | 00:16:21 | 0.015958998 | 0,124773255 |
| 00:16:12 | 0.016045839 | 0,124652307 | 00:16:22 | 0.015958361 | 0,124775856 |
| 00:16:13 | 0.016040523 | 0,124654479 | 00:16:22 | 0.015955184 | 0,124778483 |
| 00:16:13 | 0.016038356 | 0,124657224 | 00:16:22 | 0.015953048 | 0,124781238 |
| 00:16:13 | 0.016038017 | 0,124659964 | 00:16:22 | 0.015952567 | 0,124784147 |
| 00:16:13 | 0.016035637 | 0,124662603 | 00:16:22 | 0.015950155 | 0,124786532 |
| 00:16:13 | 0.016034485 | 0,124665755 | 00:16:22 | 0.015948568 | 0,124789186 |
| 00:16:14 | 0.016031664 | 0,124668366 | 00:16:23 | 0.01594682  | 0,124791741 |
| 00:16:14 | 0.016031496 | 0,124671196 | 00:16:23 | 0.015942968 | 0,124794111 |
| 00:16:14 | 0.016030694 | 0,124674041 | 00:16:23 | 0.015941355 | 0,124796722 |
| 00:16:14 | 0.016030224 | 0,124676828 | 00:16:23 | 0.015936662 | 0,124799275 |
| 00:16:14 | 0.016027703 | 0,124679598 | 00:16:23 | 0.015935287 | 0,124802031 |
| 00:16:15 | 0.016026658 | 0,124682402 | 00:16:24 | 0.015935698 | 0,124804927 |
| 00:16:15 | 0.016025846 | 0,124685557 | 00:16:24 | 0.015932351 | 0,124807647 |

|          |             |             |          |             |             |
|----------|-------------|-------------|----------|-------------|-------------|
| 00:16:24 | 0.015929874 | 0,124810091 | 00:16:33 | 0.015850963 | 0,124932997 |
| 00:16:24 | 0.015926459 | 0,124812417 | 00:16:33 | 0.015850392 | 0,124935661 |
| 00:16:25 | 0.015924115 | 0,124814761 | 00:16:34 | 0.015848948 | 0,124938415 |
| 00:16:25 | 0.015922603 | 0,124817751 | 00:16:34 | 0.015848504 | 0,124941566 |
| 00:16:25 | 0.01591912  | 0,124820451 | 00:16:34 | 0.015845234 | 0,124943816 |
| 00:16:25 | 0.015918742 | 0,124823105 | 00:16:34 | 0.015841692 | 0,124946296 |
| 00:16:25 | 0.015919626 | 0,124826263 | 00:16:34 | 0.015841688 | 0,124949212 |
| 00:16:25 | 0.015917966 | 0,12482905  | 00:16:35 | 0.015841614 | 0,12495187  |
| 00:16:26 | 0.015916288 | 0,124831738 | 00:16:35 | 0.015839773 | 0,124954453 |
| 00:16:26 | 0.015914572 | 0,124834443 | 00:16:35 | 0.015837786 | 0,124956958 |
| 00:16:26 | 0.015911253 | 0,12483707  | 00:16:35 | 0.01583368  | 0,124959269 |
| 00:16:26 | 0.015909818 | 0,124839715 | 00:16:35 | 0.015831543 | 0,124961889 |
| 00:16:27 | 0.015908931 | 0,124842185 | 00:16:36 | 0.015831072 | 0,124964542 |
| 00:16:27 | 0.015906916 | 0,124844892 | 00:16:36 | 0.015830986 | 0,124967348 |
| 00:16:27 | 0.015906323 | 0,124847699 | 00:16:36 | 0.015828741 | 0,124969711 |
| 00:16:27 | 0.015903218 | 0,124850175 | 00:16:36 | 0.01582472  | 0,12497184  |
| 00:16:27 | 0.015899845 | 0,124852555 | 00:16:36 | 0.015822598 | 0,124974623 |
| 00:16:27 | 0.015898963 | 0,124855538 | 00:16:37 | 0.015821157 | 0,124977182 |
| 00:16:28 | 0.015896825 | 0,124857851 | 00:16:37 | 0.015820092 | 0,124979895 |
| 00:16:28 | 0.015894513 | 0,124860443 | 00:16:37 | 0.015818807 | 0,124981977 |
| 00:16:28 | 0.015892898 | 0,124863149 | 00:16:37 | 0.015817931 | 0,12498486  |
| 00:16:28 | 0.015889236 | 0,124865571 | 00:16:37 | 0.015817999 | 0,124987472 |
| 00:16:28 | 0.015888213 | 0,124868501 | 00:16:38 | 0.015816639 | 0,12499029  |
| 00:16:29 | 0.015886338 | 0,124871476 | 00:16:38 | 0.015815255 | 0,124992997 |
| 00:16:29 | 0.015883099 | 0,124874169 | 00:16:38 | 0.015812993 | 0,124995472 |
| 00:16:29 | 0.01588197  | 0,124877107 | 00:16:38 | 0.015811086 | 0,124998355 |
| 00:16:29 | 0.015880346 | 0,124879704 | 00:16:38 | 0.015810218 | 0,125001062 |
| 00:16:29 | 0.015878955 | 0,124882638 | 00:16:39 | 0.015809167 | 0,125004048 |
| 00:16:30 | 0.015876574 | 0,124885266 | 00:16:39 | 0.015807502 | 0,125006473 |
| 00:16:30 | 0.015876355 | 0,124887915 | 00:16:39 | 0.015806277 | 0,12500892  |
| 00:16:30 | 0.015872952 | 0,12489039  | 00:16:39 | 0.015804887 | 0,125011549 |
| 00:16:30 | 0.015872174 | 0,124893134 | 00:16:39 | 0.015802245 | 0,125013977 |
| 00:16:30 | 0.015871488 | 0,124895565 | 00:16:40 | 0.015800247 | 0,125016399 |
| 00:16:31 | 0.015871553 | 0,12489819  | 00:16:40 | 0.015798383 | 0,125018935 |
| 00:16:31 | 0.015869976 | 0,124900719 | 00:16:40 | 0.015796772 | 0,125021461 |
| 00:16:31 | 0.015869582 | 0,124903637 | 00:16:40 | 0.015794444 | 0,125024086 |
| 00:16:31 | 0.015868903 | 0,124906344 | 00:16:40 | 0.015792765 | 0,125026402 |
| 00:16:31 | 0.015868706 | 0,124909009 | 00:16:40 | 0.015790591 | 0,125028859 |
| 00:16:32 | 0.015869434 | 0,124911772 | 00:16:41 | 0.01578846  | 0,125031415 |
| 00:16:32 | 0.015866543 | 0,124914339 | 00:16:41 | 0.015786116 | 0,12503389  |
| 00:16:32 | 0.015865182 | 0,124916936 | 00:16:41 | 0.015784015 | 0,125036227 |
| 00:16:32 | 0.015861991 | 0,12491954  | 00:16:41 | 0.015781887 | 0,125039031 |
| 00:16:32 | 0.015861609 | 0,124922409 | 00:16:41 | 0.015779535 | 0,125041553 |
| 00:16:33 | 0.01585832  | 0,124924879 | 00:16:42 | 0.015777924 | 0,12504436  |
| 00:16:33 | 0.015857763 | 0,124927693 | 00:16:42 | 0.015775615 | 0,1250471   |
| 00:16:33 | 0.015854798 | 0,124930554 | 00:16:42 | 0.015773767 | 0,125049949 |

|          |             |             |          |             |             |
|----------|-------------|-------------|----------|-------------|-------------|
| 00:16:42 | 0.015771908 | 0,125052514 | 00:16:51 | 0.01567782  | 0,12517002  |
| 00:16:43 | 0.015769857 | 0,125055243 | 00:16:52 | 0.015675444 | 0,125172405 |
| 00:16:43 | 0.015768138 | 0,125057857 | 00:16:52 | 0.015673597 | 0,125174943 |
| 00:16:43 | 0.015766008 | 0,125060286 | 00:16:52 | 0.015671414 | 0,125177477 |
| 00:16:43 | 0.015763901 | 0,125063128 | 00:16:52 | 0.015669495 | 0,125179729 |
| 00:16:43 | 0.015761624 | 0,125065854 | 00:16:52 | 0.015667412 | 0,125182441 |
| 00:16:43 | 0.015759515 | 0,125068146 | 00:16:53 | 0.015665336 | 0,125184819 |
| 00:16:44 | 0.015757817 | 0,12507068  | 00:16:53 | 0.015662949 | 0,125187093 |
| 00:16:44 | 0.015755557 | 0,125073064 | 00:16:53 | 0.015661069 | 0,125189391 |
| 00:16:44 | 0.015753367 | 0,125075725 | 00:16:53 | 0.015659101 | 0,125191823 |
| 00:16:44 | 0.015751287 | 0,125078385 | 00:16:53 | 0.015657092 | 0,125194442 |
| 00:16:45 | 0.015749254 | 0,12508113  | 00:16:54 | 0.01565505  | 0,125196943 |
| 00:16:45 | 0.015747184 | 0,125083476 | 00:16:54 | 0.015653005 | 0,125199245 |
| 00:16:45 | 0.015745416 | 0,12508585  | 00:16:54 | 0.015651174 | 0,125201783 |
| 00:16:45 | 0.015743315 | 0,12508865  | 00:16:54 | 0.015648923 | 0,125204368 |
| 00:16:45 | 0.015741112 | 0,125091247 | 00:16:54 | 0.015646805 | 0,125206768 |
| 00:16:45 | 0.015739211 | 0,125093992 | 00:16:55 | 0.015644878 | 0,125208867 |
| 00:16:46 | 0.01573686  | 0,125096524 | 00:16:55 | 0.015642765 | 0,125211231 |
| 00:16:46 | 0.015734802 | 0,125099549 | 00:16:55 | 0.015640803 | 0,125213514 |
| 00:16:46 | 0.015732578 | 0,125102094 | 00:16:55 | 0.015638904 | 0,12521619  |
| 00:16:46 | 0.015730332 | 0,125104693 | 00:16:55 | 0.015637063 | 0,125219044 |
| 00:16:46 | 0.015728196 | 0,125107137 | 00:16:56 | 0.015635455 | 0,125221521 |
| 00:16:47 | 0.01572611  | 0,125109819 | 00:16:56 | 0.015633598 | 0,125223742 |
| 00:16:47 | 0.015724249 | 0,125112339 | 00:16:56 | 0.015631885 | 0,12522628  |
| 00:16:47 | 0.015722087 | 0,125114713 | 00:16:56 | 0.01563003  | 0,125228913 |
| 00:16:47 | 0.015720164 | 0,125117306 | 00:16:56 | 0.015628075 | 0,125231272 |
| 00:16:47 | 0.015718502 | 0,125119523 | 00:16:57 | 0.015625957 | 0,125234039 |
| 00:16:48 | 0.015716329 | 0,125122202 | 00:16:57 | 0.015623782 | 0,125236699 |
| 00:16:48 | 0.015714383 | 0,125124547 | 00:16:57 | 0.015621536 | 0,125239509 |
| 00:16:48 | 0.015712259 | 0,125126886 | 00:16:57 | 0.015619187 | 0,125241934 |
| 00:16:48 | 0.015709983 | 0,125129104 | 00:16:57 | 0.015617309 | 0,125244363 |
| 00:16:48 | 0.015707846 | 0,12513137  | 00:16:58 | 0.015615235 | 0,125247155 |
| 00:16:49 | 0.015705653 | 0,125134174 | 00:16:58 | 0.015613101 | 0,125249778 |
| 00:16:49 | 0.015703692 | 0,12513671  | 00:16:58 | 0.015611454 | 0,12525227  |
| 00:16:49 | 0.015701759 | 0,125139355 | 00:16:58 | 0.015609176 | 0,125254997 |
| 00:16:49 | 0.015699371 | 0,12514163  | 00:16:58 | 0.015607281 | 0,125257904 |
| 00:16:49 | 0.015697337 | 0,125144146 | 00:16:59 | 0.015605632 | 0,125260379 |
| 00:16:50 | 0.015695244 | 0,125146657 | 00:16:59 | 0.015603804 | 0,125262919 |
| 00:16:50 | 0.015693364 | 0,125149144 | 00:16:59 | 0.015601661 | 0,12526565  |
| 00:16:50 | 0.015691617 | 0,125151726 | 00:16:59 | 0.015599532 | 0,125267918 |
| 00:16:50 | 0.01568954  | 0,125154438 | 00:16:59 | 0.015597515 | 0,125270592 |
| 00:16:50 | 0.015687841 | 0,125156862 | 00:17:00 | 0.015595582 | 0,125273261 |
| 00:16:51 | 0.015685969 | 0,125159477 | 00:17:00 | 0.015593693 | 0,125276055 |
| 00:16:51 | 0.015683981 | 0,125162285 | 00:17:00 | 0.015591741 | 0,125278356 |
| 00:16:51 | 0.015681951 | 0,125164905 | 00:17:00 | 0.015589647 | 0,125280878 |
| 00:16:51 | 0.015679853 | 0,12516761  | 00:17:00 | 0.015587399 | 0,125283217 |

|          |             |             |          |             |             |
|----------|-------------|-------------|----------|-------------|-------------|
| 00:17:00 | 0.01558524  | 0,125285501 | 00:17:10 | 0.015495438 | 0,125400754 |
| 00:17:01 | 0.015583033 | 0,125287945 | 00:17:10 | 0.015493382 | 0,125403311 |
| 00:17:01 | 0.015580981 | 0,125290355 | 00:17:10 | 0.015491584 | 0,125405936 |
| 00:17:01 | 0.015578842 | 0,125292723 | 00:17:10 | 0.015489727 | 0,12540812  |
| 00:17:01 | 0.015576815 | 0,12529522  | 00:17:10 | 0.015487629 | 0,12541066  |
| 00:17:01 | 0.015574989 | 0,125297814 | 00:17:11 | 0.015485459 | 0,125413089 |
| 00:17:02 | 0.015572884 | 0,125300472 | 00:17:11 | 0.015483168 | 0,125415689 |
| 00:17:02 | 0.015571106 | 0,125302904 | 00:17:11 | 0.015481258 | 0,125418158 |
| 00:17:02 | 0.015569108 | 0,125305331 | 00:17:11 | 0.015479393 | 0,125420546 |
| 00:17:02 | 0.015567313 | 0,125307657 | 00:17:11 | 0.015477422 | 0,125423082 |
| 00:17:02 | 0.015565077 | 0,125310204 | 00:17:12 | 0.015475688 | 0,125425618 |
| 00:17:03 | 0.01556322  | 0,125312377 | 00:17:12 | 0.015473801 | 0,125428238 |
| 00:17:03 | 0.015561091 | 0,125314751 | 00:17:12 | 0.015472134 | 0,125430836 |
| 00:17:03 | 0.015559348 | 0,125317086 | 00:17:12 | 0.015470105 | 0,125433472 |
| 00:17:03 | 0.015557322 | 0,12531975  | 00:17:12 | 0.01546809  | 0,125435926 |
| 00:17:03 | 0.01555532  | 0,125322263 | 00:17:13 | 0.015466256 | 0,125438419 |
| 00:17:04 | 0.015553401 | 0,125324899 | 00:17:13 | 0.015464197 | 0,125440924 |
| 00:17:04 | 0.015551337 | 0,125327653 | 00:17:13 | 0.015462263 | 0,125443544 |
| 00:17:04 | 0.015549358 | 0,125329975 | 00:17:13 | 0.015460298 | 0,125446109 |
| 00:17:04 | 0.015547413 | 0,125332116 | 00:17:13 | 0.015458359 | 0,125448385 |
| 00:17:04 | 0.015545398 | 0,125334582 | 00:17:14 | 0.015455965 | 0,125450772 |
| 00:17:05 | 0.015543379 | 0,125336891 | 00:17:14 | 0.015453782 | 0,125453657 |
| 00:17:05 | 0.015541654 | 0,125339466 | 00:17:14 | 0.01545206  | 0,12545588  |
| 00:17:05 | 0.015539924 | 0,125342326 | 00:17:14 | 0.015450248 | 0,125458355 |
| 00:17:05 | 0.015538177 | 0,125344674 | 00:17:14 | 0.015448213 | 0,125460796 |
| 00:17:05 | 0.015536403 | 0,125347149 | 00:17:15 | 0.015446409 | 0,125463005 |
| 00:17:06 | 0.015534561 | 0,125349705 | 00:17:15 | 0.01544452  | 0,125465319 |
| 00:17:06 | 0.015532318 | 0,125352192 | 00:17:15 | 0.01544249  | 0,125467963 |
| 00:17:06 | 0.01553006  | 0,125354677 | 00:17:15 | 0.015440607 | 0,125470382 |
| 00:17:06 | 0.015528293 | 0,125357338 | 00:17:15 | 0.015438773 | 0,125472937 |
| 00:17:06 | 0.015526646 | 0,1253601   | 00:17:15 | 0.015436988 | 0,125475629 |
| 00:17:07 | 0.015524801 | 0,125362641 | 00:17:16 | 0.015435045 | 0,12547836  |
| 00:17:07 | 0.015522656 | 0,125365056 | 00:17:16 | 0.015433155 | 0,125480934 |
| 00:17:07 | 0.015520655 | 0,12536758  | 00:17:16 | 0.015431177 | 0,12548354  |
| 00:17:07 | 0.015518824 | 0,125370081 | 00:17:16 | 0.015429218 | 0,125485882 |
| 00:17:07 | 0.015516948 | 0,125372628 | 00:17:16 | 0.015427522 | 0,125488534 |
| 00:17:08 | 0.015514777 | 0,125375191 | 00:17:17 | 0.015425524 | 0,125491015 |
| 00:17:08 | 0.015512827 | 0,125377727 | 00:17:17 | 0.015423645 | 0,125493544 |
| 00:17:08 | 0.01551098  | 0,125380387 | 00:17:17 | 0.015421538 | 0,12549622  |
| 00:17:08 | 0.015509249 | 0,125383212 | 00:17:17 | 0.015419466 | 0,125498838 |
| 00:17:08 | 0.015507183 | 0,125385392 | 00:17:18 | 0.015417354 | 0,125501411 |
| 00:17:09 | 0.015505348 | 0,125387885 | 00:17:18 | 0.015415079 | 0,1255038   |
| 00:17:09 | 0.015503465 | 0,12539049  | 00:17:18 | 0.015413088 | 0,12550643  |
| 00:17:09 | 0.015501786 | 0,125392869 | 00:17:18 | 0.015410989 | 0,125508681 |
| 00:17:09 | 0.015499482 | 0,12539574  | 00:17:18 | 0.015409    | 0,125511254 |
| 00:17:09 | 0.015497511 | 0,125398278 | 00:17:18 | 0.015407087 | 0,125513874 |

|          |             |             |          |             |             |
|----------|-------------|-------------|----------|-------------|-------------|
| 00:17:19 | 0.015405125 | 0,125516191 | 00:17:28 | 0.015319216 | 0,125630001 |
| 00:17:19 | 0.015403319 | 0,125518724 | 00:17:28 | 0.015316851 | 0,125632237 |
| 00:17:19 | 0.01540138  | 0,125521214 | 00:17:28 | 0.015314883 | 0,125634807 |
| 00:17:19 | 0.015399679 | 0,125523525 | 00:17:28 | 0.015312844 | 0,125637233 |
| 00:17:20 | 0.01539807  | 0,125525829 | 00:17:29 | 0.0153108   | 0,125639817 |
| 00:17:20 | 0.015396122 | 0,125528212 | 00:17:29 | 0.015308781 | 0,125642152 |
| 00:17:20 | 0.015394421 | 0,12553076  | 00:17:29 | 0.015306915 | 0,125644665 |
| 00:17:20 | 0.015392771 | 0,125533317 | 00:17:29 | 0.015304784 | 0,125647084 |
| 00:17:20 | 0.015390876 | 0,125536099 | 00:17:29 | 0.015302732 | 0,125649498 |
| 00:17:20 | 0.015388805 | 0,125538714 | 00:17:30 | 0.015300869 | 0,125652011 |
| 00:17:21 | 0.015386973 | 0,125541177 | 00:17:30 | 0.015299204 | 0,125654549 |
| 00:17:21 | 0.015384715 | 0,125543735 | 00:17:30 | 0.015297102 | 0,125656944 |
| 00:17:21 | 0.015382541 | 0,125546242 | 00:17:30 | 0.015295472 | 0,125659242 |
| 00:17:21 | 0.015380656 | 0,125548601 | 00:17:30 | 0.0152936   | 0,125661591 |
| 00:17:21 | 0.015378678 | 0,125551106 | 00:17:30 | 0.015291682 | 0,125664006 |
| 00:17:22 | 0.015376708 | 0,125553781 | 00:17:31 | 0.015289739 | 0,125666494 |
| 00:17:22 | 0.015374747 | 0,125556219 | 00:17:31 | 0.015287764 | 0,125668843 |
| 00:17:22 | 0.015372703 | 0,125558927 | 00:17:31 | 0.015285852 | 0,125671041 |
| 00:17:22 | 0.015370887 | 0,125561275 | 00:17:31 | 0.01528366  | 0,12567387  |
| 00:17:22 | 0.015368634 | 0,12556345  | 00:17:31 | 0.015281484 | 0,125676385 |
| 00:17:23 | 0.015366689 | 0,125565973 | 00:17:32 | 0.01527972  | 0,125678817 |
| 00:17:23 | 0.015364934 | 0,125568332 | 00:17:32 | 0.015277662 | 0,125681301 |
| 00:17:23 | 0.015363172 | 0,125570693 | 00:17:32 | 0.015275833 | 0,125683701 |
| 00:17:23 | 0.015361486 | 0,125572836 | 00:17:32 | 0.015274011 | 0,125685964 |
| 00:17:23 | 0.015359778 | 0,125575278 | 00:17:33 | 0.015272042 | 0,125688206 |
| 00:17:24 | 0.01535773  | 0,125577814 | 00:17:33 | 0.015269918 | 0,125690572 |
| 00:17:24 | 0.015355933 | 0,125580414 | 00:17:33 | 0.015267857 | 0,125693159 |
| 00:17:24 | 0.015354012 | 0,125583042 | 00:17:33 | 0.015265847 | 0,125695686 |
| 00:17:24 | 0.015352211 | 0,125585498 | 00:17:33 | 0.015263937 | 0,125698245 |
| 00:17:24 | 0.015350365 | 0,125588303 | 00:17:33 | 0.015261906 | 0,125700511 |
| 00:17:25 | 0.015348596 | 0,125591057 | 00:17:34 | 0.015260146 | 0,125702719 |
| 00:17:25 | 0.015346462 | 0,125593397 | 00:17:34 | 0.015257965 | 0,125705238 |
| 00:17:25 | 0.015344559 | 0,125596102 | 00:17:34 | 0.015256125 | 0,125707437 |
| 00:17:25 | 0.015342388 | 0,125598675 | 00:17:34 | 0.01525401  | 0,12571008  |
| 00:17:25 | 0.015340663 | 0,12560098  | 00:17:35 | 0.015252022 | 0,125712195 |
| 00:17:26 | 0.015338795 | 0,125603585 | 00:17:35 | 0.015249979 | 0,125714948 |
| 00:17:26 | 0.015337022 | 0,125606091 | 00:17:35 | 0.015248095 | 0,12571729  |
| 00:17:26 | 0.015335278 | 0,125608529 | 00:17:35 | 0.015246508 | 0,125719982 |
| 00:17:26 | 0.015333478 | 0,12561123  | 00:17:35 | 0.015244462 | 0,125722315 |
| 00:17:26 | 0.015331656 | 0,125613728 | 00:17:35 | 0.015242926 | 0,125724855 |
| 00:17:27 | 0.015329815 | 0,125616061 | 00:17:36 | 0.015240929 | 0,12572699  |
| 00:17:27 | 0.015328059 | 0,125618576 | 00:17:36 | 0.015239291 | 0,125729493 |
| 00:17:27 | 0.015326257 | 0,125621067 | 00:17:36 | 0.015237409 | 0,125731759 |
| 00:17:27 | 0.015324241 | 0,125623311 | 00:17:36 | 0.015235495 | 0,125733886 |
| 00:17:27 | 0.015322396 | 0,125625556 | 00:17:36 | 0.015233839 | 0,125736148 |
| 00:17:28 | 0.015320787 | 0,125627774 | 00:17:37 | 0.015232158 | 0,125738775 |

|          |             |             |          |             |             |
|----------|-------------|-------------|----------|-------------|-------------|
| 00:17:37 | 0.01523042  | 0,125741343 | 00:17:46 | 0.015146859 | 0,125851272 |
| 00:17:37 | 0.015228635 | 0,125743954 | 00:17:46 | 0.015145005 | 0,125853537 |
| 00:17:37 | 0.015226967 | 0,125746561 | 00:17:46 | 0.015143099 | 0,125855836 |
| 00:17:37 | 0.015224939 | 0,125749059 | 00:17:47 | 0.015141145 | 0,125858062 |
| 00:17:38 | 0.015223195 | 0,125751694 | 00:17:47 | 0.015138604 | 0,125860412 |
| 00:17:38 | 0.015221161 | 0,125754004 | 00:17:47 | 0.01513651  | 0,125862729 |
| 00:17:38 | 0.015219234 | 0,125756231 | 00:17:47 | 0.015134961 | 0,125865111 |
| 00:17:38 | 0.015217579 | 0,125758577 | 00:17:47 | 0.015133175 | 0,12586732  |
| 00:17:38 | 0.01521559  | 0,125760929 | 00:17:48 | 0.015131364 | 0,125869359 |
| 00:17:39 | 0.015213737 | 0,125763355 | 00:17:48 | 0.015129623 | 0,12587166  |
| 00:17:39 | 0.015211705 | 0,125765916 | 00:17:48 | 0.015127889 | 0,125874202 |
| 00:17:39 | 0.015209729 | 0,125768631 | 00:17:48 | 0.01512595  | 0,125876646 |
| 00:17:39 | 0.015207889 | 0,125771123 | 00:17:48 | 0.015124428 | 0,125878828 |
| 00:17:39 | 0.015206039 | 0,125773437 | 00:17:49 | 0.015122381 | 0,125881327 |
| 00:17:40 | 0.01520414  | 0,125775811 | 00:17:49 | 0.01512074  | 0,125883913 |
| 00:17:40 | 0.015202527 | 0,125778269 | 00:17:49 | 0.0151189   | 0,125886526 |
| 00:17:40 | 0.015200735 | 0,125780922 | 00:17:49 | 0.015117018 | 0,125888663 |
| 00:17:40 | 0.015198856 | 0,125783058 | 00:17:49 | 0.015115164 | 0,125890803 |
| 00:17:40 | 0.015197175 | 0,125785315 | 00:17:49 | 0.015113324 | 0,125893179 |
| 00:17:41 | 0.015195233 | 0,125787625 | 00:17:50 | 0.015111315 | 0,125895517 |
| 00:17:41 | 0.015193294 | 0,12579015  | 00:17:50 | 0.015109573 | 0,125897752 |
| 00:17:41 | 0.015191672 | 0,125792251 | 00:17:50 | 0.015107852 | 0,125899888 |
| 00:17:41 | 0.01518993  | 0,125794428 | 00:17:50 | 0.015105832 | 0,125902329 |
| 00:17:41 | 0.015188369 | 0,12579698  | 00:17:50 | 0.015104259 | 0,125904746 |
| 00:17:42 | 0.015186792 | 0,125799183 | 00:17:51 | 0.015102528 | 0,125907241 |
| 00:17:42 | 0.015185137 | 0,125801425 | 00:17:51 | 0.015100995 | 0,12590931  |
| 00:17:42 | 0.015183311 | 0,125803796 | 00:17:51 | 0.01509916  | 0,125911704 |
| 00:17:42 | 0.015181563 | 0,125806108 | 00:17:51 | 0.015096951 | 0,125913808 |
| 00:17:42 | 0.015179624 | 0,125808421 | 00:17:51 | 0.015095075 | 0,125916166 |
| 00:17:43 | 0.015177828 | 0,125810706 | 00:17:52 | 0.015093063 | 0,125918564 |
| 00:17:43 | 0.015176088 | 0,125813089 | 00:17:52 | 0.015091353 | 0,12592098  |
| 00:17:43 | 0.015173981 | 0,125815533 | 00:17:52 | 0.015089527 | 0,125923071 |
| 00:17:43 | 0.015172517 | 0,125817901 | 00:17:52 | 0.015087566 | 0,125925299 |
| 00:17:43 | 0.015170719 | 0,125820504 | 00:17:52 | 0.015085785 | 0,125927604 |
| 00:17:44 | 0.015168704 | 0,125822933 | 00:17:53 | 0.015084015 | 0,125930069 |
| 00:17:44 | 0.015166815 | 0,12582556  | 00:17:53 | 0.015082121 | 0,125932401 |
| 00:17:44 | 0.015164966 | 0,12582777  | 00:17:53 | 0.015080205 | 0,125934602 |
| 00:17:44 | 0.015163174 | 0,125830009 | 00:17:53 | 0.015078437 | 0,12593702  |
| 00:17:44 | 0.015161357 | 0,125832197 | 00:17:53 | 0.015076703 | 0,125939454 |
| 00:17:45 | 0.015159689 | 0,125834869 | 00:17:54 | 0.015074887 | 0,125941581 |
| 00:17:45 | 0.015157937 | 0,125837501 | 00:17:54 | 0.01507317  | 0,125943911 |
| 00:17:45 | 0.015155901 | 0,125840012 | 00:17:54 | 0.015071182 | 0,125946221 |
| 00:17:45 | 0.015154099 | 0,125842409 | 00:17:54 | 0.015069286 | 0,125948655 |
| 00:17:45 | 0.015152173 | 0,125844611 | 00:17:54 | 0.015067572 | 0,125951128 |
| 00:17:46 | 0.015150184 | 0,125846755 | 00:17:55 | 0.015065877 | 0,125953339 |
| 00:17:46 | 0.015148389 | 0,125849017 | 00:17:55 | 0.015063994 | 0,125955423 |

|          |             |             |          |             |             |
|----------|-------------|-------------|----------|-------------|-------------|
| 00:17:55 | 0.015062179 | 0,125957778 | 00:18:04 | 0.01498014  | 0,126064503 |
| 00:17:55 | 0.015060391 | 0,125960203 | 00:18:04 | 0.014978495 | 0,126066841 |
| 00:17:55 | 0.015058723 | 0,125962583 | 00:18:05 | 0.014976542 | 0,126069175 |
| 00:17:56 | 0.015057194 | 0,125965207 | 00:18:05 | 0.01497491  | 0,126071441 |
| 00:17:56 | 0.015055313 | 0,125967513 | 00:18:05 | 0.01497336  | 0,126073901 |
| 00:17:56 | 0.015053422 | 0,125969743 | 00:18:05 | 0.01497176  | 0,126076373 |
| 00:17:56 | 0.015051461 | 0,125972089 | 00:18:05 | 0.014969741 | 0,126078742 |
| 00:17:56 | 0.015049649 | 0,125974448 | 00:18:05 | 0.014967963 | 0,126080991 |
| 00:17:57 | 0.015047621 | 0,125977115 | 00:18:06 | 0.014966059 | 0,126083198 |
| 00:17:57 | 0.015045637 | 0,125979384 | 00:18:06 | 0.01496405  | 0,126085443 |
| 00:17:57 | 0.015043965 | 0,125981793 | 00:18:06 | 0.014961781 | 0,12608767  |
| 00:17:57 | 0.015042087 | 0,125983994 | 00:18:06 | 0.014959916 | 0,126090033 |
| 00:17:57 | 0.015039803 | 0,125986347 | 00:18:07 | 0.014957708 | 0,126092007 |
| 00:17:58 | 0.0150382   | 0,125988685 | 00:18:07 | 0.014955917 | 0,126094318 |
| 00:17:58 | 0.015036304 | 0,125991011 | 00:18:07 | 0.014953948 | 0,126096578 |
| 00:17:58 | 0.015034602 | 0,125993292 | 00:18:07 | 0.014952002 | 0,126098864 |
| 00:17:58 | 0.015032696 | 0,125995767 | 00:18:07 | 0.014950042 | 0,126101252 |
| 00:17:58 | 0.015030874 | 0,125998022 | 00:18:07 | 0.014948349 | 0,126103654 |
| 00:17:59 | 0.015029126 | 0,126000261 | 00:18:08 | 0.014946675 | 0,126105774 |
| 00:17:59 | 0.015027338 | 0,126002682 | 00:18:08 | 0.014944671 | 0,126108014 |
| 00:17:59 | 0.015025509 | 0,126004923 | 00:18:08 | 0.014942631 | 0,126110686 |
| 00:17:59 | 0.015023904 | 0,126007316 | 00:18:08 | 0.014940528 | 0,126112988 |
| 00:17:59 | 0.015022229 | 0,126009823 | 00:18:09 | 0.014938753 | 0,126115109 |
| 00:18:00 | 0.01502024  | 0,126012    | 00:18:09 | 0.014936898 | 0,126117476 |
| 00:18:00 | 0.015018281 | 0,126014236 | 00:18:09 | 0.014935002 | 0,126119723 |
| 00:18:00 | 0.015016628 | 0,126016546 | 00:18:09 | 0.014933436 | 0,126122234 |
| 00:18:00 | 0.015014802 | 0,126018863 | 00:18:09 | 0.014931438 | 0,126124519 |
| 00:18:00 | 0.015013079 | 0,12602109  | 00:18:09 | 0.014929485 | 0,126126929 |
| 00:18:01 | 0.015011362 | 0,126023425 | 00:18:10 | 0.014927483 | 0,126128931 |
| 00:18:01 | 0.015009407 | 0,126025883 | 00:18:10 | 0.014925762 | 0,126131309 |
| 00:18:01 | 0.015007917 | 0,126027962 | 00:18:10 | 0.014923886 | 0,126133669 |
| 00:18:01 | 0.015006268 | 0,126030133 | 00:18:10 | 0.014922169 | 0,126135737 |
| 00:18:01 | 0.015004759 | 0,126032579 | 00:18:10 | 0.014920614 | 0,126137872 |
| 00:18:02 | 0.015003028 | 0,126034899 | 00:18:11 | 0.014918937 | 0,126140172 |
| 00:18:02 | 0.015001376 | 0,126037413 | 00:18:11 | 0.014917167 | 0,126142402 |
| 00:18:02 | 0.014999689 | 0,126039755 | 00:18:11 | 0.01491569  | 0,12614483  |
| 00:18:02 | 0.014998043 | 0,126041933 | 00:18:11 | 0.0149138   | 0,126147111 |
| 00:18:02 | 0.014996168 | 0,126044568 | 00:18:11 | 0.01491209  | 0,126149471 |
| 00:18:03 | 0.014994594 | 0,126046736 | 00:18:12 | 0.014910074 | 0,126151839 |
| 00:18:03 | 0.014992819 | 0,126048918 | 00:18:12 | 0.014908286 | 0,126154003 |
| 00:18:03 | 0.01499094  | 0,12605126  | 00:18:12 | 0.014906593 | 0,126156463 |
| 00:18:03 | 0.014989011 | 0,12605353  | 00:18:12 | 0.014904659 | 0,126158832 |
| 00:18:03 | 0.014987204 | 0,126055832 | 00:18:12 | 0.014903099 | 0,126161256 |
| 00:18:04 | 0.014985624 | 0,126057974 | 00:18:13 | 0.01490093  | 0,126163859 |
| 00:18:04 | 0.014983667 | 0,126060271 | 00:18:13 | 0.014899282 | 0,126166138 |
| 00:18:04 | 0.014981745 | 0,126062301 | 00:18:13 | 0.014897426 | 0,12616861  |

|          |             |             |          |             |             |
|----------|-------------|-------------|----------|-------------|-------------|
| 00:18:13 | 0.014895707 | 0,126171023 | 00:18:22 | 0.014814614 | 0,126276911 |
| 00:18:13 | 0.014894067 | 0,12617346  | 00:18:23 | 0.014813    | 0,126279011 |
| 00:18:14 | 0.014892333 | 0,126175698 | 00:18:23 | 0.014811283 | 0,126281374 |
| 00:18:14 | 0.014890617 | 0,126178041 | 00:18:23 | 0.014809494 | 0,126283638 |
| 00:18:14 | 0.014888603 | 0,126180385 | 00:18:23 | 0.014807703 | 0,126285906 |
| 00:18:14 | 0.014886935 | 0,126182799 | 00:18:23 | 0.014805857 | 0,126287933 |
| 00:18:14 | 0.014884997 | 0,126184949 | 00:18:24 | 0.014804124 | 0,126290223 |
| 00:18:15 | 0.014883442 | 0,12618727  | 00:18:24 | 0.014802445 | 0,126292223 |
| 00:18:15 | 0.014881487 | 0,126189484 | 00:18:24 | 0.014801046 | 0,126294482 |
| 00:18:15 | 0.014879594 | 0,126191552 | 00:18:24 | 0.014799448 | 0,126296627 |
| 00:18:15 | 0.014877711 | 0,126193986 | 00:18:24 | 0.014797625 | 0,126298756 |
| 00:18:15 | 0.014875957 | 0,126196386 | 00:18:24 | 0.014795764 | 0,126301086 |
| 00:18:16 | 0.014874536 | 0,126198719 | 00:18:25 | 0.014794205 | 0,126303533 |
| 00:18:16 | 0.014872692 | 0,12620094  | 00:18:25 | 0.014792474 | 0,126305562 |
| 00:18:16 | 0.014871217 | 0,126203286 | 00:18:25 | 0.014791034 | 0,12630787  |
| 00:18:16 | 0.014869336 | 0,126205617 | 00:18:25 | 0.014789042 | 0,126310158 |
| 00:18:16 | 0.014867615 | 0,126207938 | 00:18:25 | 0.014787124 | 0,126312272 |
| 00:18:17 | 0.014865768 | 0,126210129 | 00:18:26 | 0.014785656 | 0,126314831 |
| 00:18:17 | 0.014863961 | 0,126212414 | 00:18:26 | 0.014783961 | 0,126317089 |
| 00:18:17 | 0.014862193 | 0,126215029 | 00:18:26 | 0.014782084 | 0,126319655 |
| 00:18:17 | 0.014860312 | 0,126217237 | 00:18:26 | 0.014780314 | 0,126321731 |
| 00:18:17 | 0.014858412 | 0,126219436 | 00:18:26 | 0.014778311 | 0,126323845 |
| 00:18:18 | 0.014856903 | 0,126221796 | 00:18:27 | 0.014776668 | 0,126326168 |
| 00:18:18 | 0.014855182 | 0,126223951 | 00:18:27 | 0.014774921 | 0,126328213 |
| 00:18:18 | 0.014853721 | 0,126226181 | 00:18:27 | 0.014773074 | 0,126330523 |
| 00:18:18 | 0.014851827 | 0,126228536 | 00:18:27 | 0.014771255 | 0,126332667 |
| 00:18:18 | 0.014850155 | 0,126230924 | 00:18:27 | 0.014769435 | 0,126334869 |
| 00:18:19 | 0.014848284 | 0,126233086 | 00:18:28 | 0.014767939 | 0,12633697  |
| 00:18:19 | 0.014846335 | 0,126235502 | 00:18:28 | 0.014766146 | 0,126339168 |
| 00:18:19 | 0.014844378 | 0,126237783 | 00:18:28 | 0.014764339 | 0,126341564 |
| 00:18:19 | 0.014842567 | 0,126240155 | 00:18:28 | 0.014762401 | 0,126343627 |
| 00:18:19 | 0.014840981 | 0,126242292 | 00:18:28 | 0.014760483 | 0,12634605  |
| 00:18:20 | 0.014839144 | 0,126244355 | 00:18:29 | 0.01475866  | 0,126348289 |
| 00:18:20 | 0.014837569 | 0,12624633  | 00:18:29 | 0.014757053 | 0,126350548 |
| 00:18:20 | 0.014835764 | 0,126248682 | 00:18:29 | 0.014755184 | 0,126352927 |
| 00:18:20 | 0.014833781 | 0,126250993 | 00:18:29 | 0.014753489 | 0,126354813 |
| 00:18:20 | 0.01483221  | 0,126253355 | 00:18:29 | 0.014752    | 0,126356826 |
| 00:18:21 | 0.014830314 | 0,126255761 | 00:18:30 | 0.014750441 | 0,126359071 |
| 00:18:21 | 0.014828642 | 0,126258033 | 00:18:30 | 0.014748678 | 0,126361061 |
| 00:18:21 | 0.014826879 | 0,126260256 | 00:18:30 | 0.014746929 | 0,126363073 |
| 00:18:21 | 0.014825013 | 0,126262386 | 00:18:30 | 0.014745204 | 0,126365322 |
| 00:18:21 | 0.014823397 | 0,126264842 | 00:18:30 | 0.014743447 | 0,126367589 |
| 00:18:22 | 0.014821618 | 0,126267313 | 00:18:31 | 0.014741684 | 0,126369984 |
| 00:18:22 | 0.014819705 | 0,126269737 | 00:18:31 | 0.014740054 | 0,126372542 |
| 00:18:22 | 0.014817739 | 0,126272137 | 00:18:31 | 0.014738583 | 0,126374669 |
| 00:18:22 | 0.014816098 | 0,126274642 | 00:18:31 | 0.01473707  | 0,126376924 |

|          |             |             |          |             |             |
|----------|-------------|-------------|----------|-------------|-------------|
| 00:18:31 | 0.014735369 | 0,126379148 | 00:18:40 | 0.014658163 | 0,126481446 |
| 00:18:32 | 0.014733831 | 0,12638168  | 00:18:41 | 0.014656557 | 0,126483873 |
| 00:18:32 | 0.014732232 | 0,126384019 | 00:18:41 | 0.014654727 | 0,126485982 |
| 00:18:32 | 0.01473037  | 0,126385928 | 00:18:41 | 0.014652934 | 0,126488167 |
| 00:18:32 | 0.014728523 | 0,126388139 | 00:18:41 | 0.014651337 | 0,126490329 |
| 00:18:32 | 0.014727034 | 0,12639046  | 00:18:42 | 0.014650006 | 0,126492474 |
| 00:18:33 | 0.014725468 | 0,126392386 | 00:18:42 | 0.014648392 | 0,126494565 |
| 00:18:33 | 0.014723866 | 0,126394588 | 00:18:42 | 0.014646787 | 0,126496761 |
| 00:18:33 | 0.014722251 | 0,126396738 | 00:18:42 | 0.014645126 | 0,126498866 |
| 00:18:33 | 0.014720389 | 0,126398749 | 00:18:42 | 0.014643371 | 0,126500898 |
| 00:18:33 | 0.014718713 | 0,126401178 | 00:18:42 | 0.014641749 | 0,126503204 |
| 00:18:34 | 0.014716941 | 0,126403461 | 00:18:43 | 0.014639821 | 0,12650558  |
| 00:18:34 | 0.014715316 | 0,126405691 | 00:18:43 | 0.014638133 | 0,126507841 |
| 00:18:34 | 0.014713213 | 0,126407997 | 00:18:43 | 0.014636494 | 0,126509942 |
| 00:18:34 | 0.014711463 | 0,126410085 | 00:18:43 | 0.014634636 | 0,126512043 |
| 00:18:34 | 0.014709693 | 0,126412521 | 00:18:44 | 0.014633198 | 0,126514066 |
| 00:18:35 | 0.014708079 | 0,12641455  | 00:18:44 | 0.014631164 | 0,126516233 |
| 00:18:35 | 0.01470638  | 0,126416853 | 00:18:44 | 0.014629458 | 0,12651847  |
| 00:18:35 | 0.014704734 | 0,126419187 | 00:18:44 | 0.014627778 | 0,12652053  |
| 00:18:35 | 0.014702953 | 0,126421219 | 00:18:44 | 0.014626067 | 0,126522962 |
| 00:18:35 | 0.014701304 | 0,126423428 | 00:18:44 | 0.014624529 | 0,126525124 |
| 00:18:36 | 0.014699847 | 0,126425674 | 00:18:45 | 0.014622834 | 0,12652717  |
| 00:18:36 | 0.014698105 | 0,126428328 | 00:18:45 | 0.014621075 | 0,126529292 |
| 00:18:36 | 0.014696393 | 0,126430367 | 00:18:45 | 0.014619186 | 0,12653139  |
| 00:18:36 | 0.01469458  | 0,126432547 | 00:18:45 | 0.014617656 | 0,126533685 |
| 00:18:36 | 0.014692885 | 0,126434915 | 00:18:45 | 0.014615801 | 0,126535712 |
| 00:18:37 | 0.014691153 | 0,126437111 | 00:18:46 | 0.014614255 | 0,12653774  |
| 00:18:37 | 0.014689511 | 0,126439612 | 00:18:46 | 0.014612634 | 0,126539945 |
| 00:18:37 | 0.014688124 | 0,126441869 | 00:18:46 | 0.014610807 | 0,126542173 |
| 00:18:37 | 0.014686646 | 0,126443956 | 00:18:46 | 0.014609056 | 0,126544183 |
| 00:18:37 | 0.014685385 | 0,12644613  | 00:18:46 | 0.014607233 | 0,126546433 |
| 00:18:38 | 0.014683792 | 0,126448339 | 00:18:47 | 0.014605556 | 0,126548528 |
| 00:18:38 | 0.014682099 | 0,12645061  | 00:18:47 | 0.014603851 | 0,126550702 |
| 00:18:38 | 0.014680209 | 0,126452799 | 00:18:47 | 0.014602152 | 0,126552804 |
| 00:18:38 | 0.014678722 | 0,126455061 | 00:18:47 | 0.014600573 | 0,126555237 |
| 00:18:38 | 0.014676841 | 0,126457364 | 00:18:47 | 0.014598906 | 0,126557431 |
| 00:18:39 | 0.014675345 | 0,126459459 | 00:18:48 | 0.014597104 | 0,126559611 |
| 00:18:39 | 0.014673578 | 0,12646169  | 00:18:48 | 0.014595409 | 0,126561943 |
| 00:18:39 | 0.014671878 | 0,126463821 | 00:18:48 | 0.014593879 | 0,126563805 |
| 00:18:39 | 0.014670165 | 0,126465991 | 00:18:48 | 0.014592264 | 0,126566091 |
| 00:18:39 | 0.014668345 | 0,126468344 | 00:18:48 | 0.014590367 | 0,126568293 |
| 00:18:39 | 0.01466655  | 0,126470511 | 00:18:49 | 0.014588764 | 0,126570364 |
| 00:18:40 | 0.014664861 | 0,126472596 | 00:18:49 | 0.01458737  | 0,126572517 |
| 00:18:40 | 0.014663032 | 0,12647452  | 00:18:49 | 0.01458587  | 0,126574465 |
| 00:18:40 | 0.014661364 | 0,126477103 | 00:18:49 | 0.014583885 | 0,126576671 |
| 00:18:40 | 0.014659819 | 0,126479284 | 00:18:49 | 0.014582301 | 0,126578925 |

|          |             |             |          |             |             |
|----------|-------------|-------------|----------|-------------|-------------|
| 00:18:50 | 0.014580624 | 0,126581088 | 00:18:59 | 0.01450597  | 0,126681125 |
| 00:18:50 | 0.014579075 | 0,126583427 | 00:18:59 | 0.014504108 | 0,126683352 |
| 00:18:50 | 0.014577368 | 0,126585527 | 00:18:59 | 0.014502343 | 0,126685547 |
| 00:18:50 | 0.014575624 | 0,12658767  | 00:18:59 | 0.014500848 | 0,126687758 |
| 00:18:50 | 0.014574226 | 0,126589888 | 00:18:59 | 0.014499088 | 0,126689719 |
| 00:18:51 | 0.014572352 | 0,12659226  | 00:19:00 | 0.014497165 | 0,126691514 |
| 00:18:51 | 0.014570405 | 0,126594381 | 00:19:00 | 0.014495737 | 0,126693589 |
| 00:18:51 | 0.014568902 | 0,126596384 | 00:19:00 | 0.014494255 | 0,126695641 |
| 00:18:51 | 0.014567356 | 0,126598543 | 00:19:00 | 0.014492782 | 0,126697745 |
| 00:18:51 | 0.014565634 | 0,12660074  | 00:19:00 | 0.014491378 | 0,126699914 |
| 00:18:52 | 0.014564082 | 0,12660299  | 00:19:01 | 0.014489885 | 0,126702267 |
| 00:18:52 | 0.014562581 | 0,126605488 | 00:19:01 | 0.014488113 | 0,126704485 |
| 00:18:52 | 0.014560871 | 0,126607506 | 00:19:01 | 0.014486249 | 0,126706589 |
| 00:18:52 | 0.014559247 | 0,126609975 | 00:19:01 | 0.01448435  | 0,126708807 |
| 00:18:52 | 0.014557689 | 0,126612086 | 00:19:01 | 0.014482673 | 0,126711349 |
| 00:18:53 | 0.014556337 | 0,126613767 | 00:19:02 | 0.014480973 | 0,126713671 |
| 00:18:53 | 0.014554704 | 0,126615832 | 00:19:02 | 0.014478886 | 0,126715839 |
| 00:18:53 | 0.014552985 | 0,126618156 | 00:19:02 | 0.014477148 | 0,126718094 |
| 00:18:53 | 0.014551185 | 0,126620174 | 00:19:02 | 0.014475471 | 0,126720277 |
| 00:18:53 | 0.01454966  | 0,126622204 | 00:19:02 | 0.014473938 | 0,126722389 |
| 00:18:54 | 0.014548047 | 0,126624436 | 00:19:03 | 0.014472171 | 0,126724569 |
| 00:18:54 | 0.014546497 | 0,126626728 | 00:19:03 | 0.014470413 | 0,126726984 |
| 00:18:54 | 0.014544926 | 0,12662899  | 00:19:03 | 0.014468531 | 0,126728926 |
| 00:18:54 | 0.014543264 | 0,126631231 | 00:19:03 | 0.014466974 | 0,126730942 |
| 00:18:54 | 0.014541515 | 0,126633613 | 00:19:03 | 0.014465421 | 0,126733259 |
| 00:18:55 | 0.014539887 | 0,126635835 | 00:19:04 | 0.014463588 | 0,126735156 |
| 00:18:55 | 0.01453809  | 0,12663782  | 00:19:04 | 0.014461961 | 0,126737132 |
| 00:18:55 | 0.014536225 | 0,126640088 | 00:19:04 | 0.014460142 | 0,126739349 |
| 00:18:55 | 0.014534528 | 0,126642344 | 00:19:04 | 0.014458687 | 0,126741284 |
| 00:18:55 | 0.014532997 | 0,126644348 | 00:19:04 | 0.01445712  | 0,126743503 |
| 00:18:56 | 0.014531295 | 0,126646457 | 00:19:05 | 0.014455643 | 0,126745812 |
| 00:18:56 | 0.01452977  | 0,126648655 | 00:19:05 | 0.014453868 | 0,126747829 |
| 00:18:56 | 0.014528158 | 0,126650884 | 00:19:05 | 0.014452316 | 0,126749906 |
| 00:18:56 | 0.014526379 | 0,126653195 | 00:19:05 | 0.01445058  | 0,126752242 |
| 00:18:56 | 0.014524774 | 0,126655383 | 00:19:05 | 0.014449051 | 0,126754229 |
| 00:18:57 | 0.014523083 | 0,126657726 | 00:19:06 | 0.014447266 | 0,126756316 |
| 00:18:57 | 0.014521322 | 0,126659993 | 00:19:06 | 0.014445901 | 0,126758314 |
| 00:18:57 | 0.014519843 | 0,126662161 | 00:19:06 | 0.014444296 | 0,126760115 |
| 00:18:57 | 0.014517993 | 0,126664291 | 00:19:06 | 0.014442683 | 0,126762259 |
| 00:18:57 | 0.014516589 | 0,126666545 | 00:19:06 | 0.014441043 | 0,126764355 |
| 00:18:58 | 0.014515164 | 0,126668718 | 00:19:07 | 0.014439479 | 0,126766584 |
| 00:18:58 | 0.014513442 | 0,126670901 | 00:19:07 | 0.014437697 | 0,126768702 |
| 00:18:58 | 0.014511972 | 0,126672844 | 00:19:07 | 0.014436135 | 0,12677076  |
| 00:18:58 | 0.014510272 | 0,126675207 | 00:19:07 | 0.014434296 | 0,12677288  |
| 00:18:58 | 0.014508887 | 0,12667725  | 00:19:07 | 0.014432659 | 0,126775064 |
| 00:18:59 | 0.014507432 | 0,126679186 | 00:19:08 | 0.014431242 | 0,126777222 |

|          |             |             |          |             |             |
|----------|-------------|-------------|----------|-------------|-------------|
| 00:19:08 | 0.014429741 | 0,126779308 | 00:19:17 | 0.014354649 | 0,126875925 |
| 00:19:08 | 0.014428269 | 0,126781415 | 00:19:17 | 0.014353147 | 0,126877972 |
| 00:19:08 | 0.014426344 | 0,126783497 | 00:19:17 | 0.014351657 | 0,12687978  |
| 00:19:08 | 0.014424868 | 0,12678527  | 00:19:17 | 0.014350015 | 0,12688204  |
| 00:19:09 | 0.014423239 | 0,126787562 | 00:19:18 | 0.014348559 | 0,126884271 |
| 00:19:09 | 0.014421583 | 0,126789478 | 00:19:18 | 0.014347016 | 0,12688632  |
| 00:19:09 | 0.014419678 | 0,126791339 | 00:19:18 | 0.014345407 | 0,126888575 |
| 00:19:09 | 0.014417947 | 0,126793407 | 00:19:18 | 0.014343821 | 0,126890805 |
| 00:19:09 | 0.014416496 | 0,12679558  | 00:19:18 | 0.014342318 | 0,126893174 |
| 00:19:10 | 0.0144149   | 0,126797947 | 00:19:19 | 0.014340742 | 0,126895199 |
| 00:19:10 | 0.014413111 | 0,126800007 | 00:19:19 | 0.014339234 | 0,126897137 |
| 00:19:10 | 0.014411291 | 0,126801859 | 00:19:19 | 0.014337576 | 0,126899271 |
| 00:19:10 | 0.01440962  | 0,126804104 | 00:19:19 | 0.014335894 | 0,126901324 |
| 00:19:10 | 0.014408067 | 0,126806389 | 00:19:19 | 0.014334451 | 0,126903453 |
| 00:19:11 | 0.014406019 | 0,126808393 | 00:19:20 | 0.014332841 | 0,126905704 |
| 00:19:11 | 0.014404688 | 0,126810416 | 00:19:20 | 0.014331033 | 0,126908041 |
| 00:19:11 | 0.014402991 | 0,12681248  | 00:19:20 | 0.014329574 | 0,126910199 |
| 00:19:11 | 0.014401352 | 0,126814514 | 00:19:20 | 0.014328103 | 0,126912035 |
| 00:19:11 | 0.014399662 | 0,126816743 | 00:19:20 | 0.014326356 | 0,126914073 |
| 00:19:12 | 0.014397929 | 0,126818815 | 00:19:21 | 0.01432478  | 0,126916304 |
| 00:19:12 | 0.014396578 | 0,126820954 | 00:19:21 | 0.014323423 | 0,126918529 |
| 00:19:12 | 0.014394879 | 0,126823221 | 00:19:21 | 0.01432184  | 0,126920423 |
| 00:19:12 | 0.014393494 | 0,126825146 | 00:19:21 | 0.014320253 | 0,126922386 |
| 00:19:12 | 0.01439207  | 0,12682705  | 00:19:21 | 0.014318457 | 0,126924458 |
| 00:19:13 | 0.014390211 | 0,126829141 | 00:19:22 | 0.01431666  | 0,126926483 |
| 00:19:13 | 0.014388558 | 0,126831324 | 00:19:22 | 0.014314867 | 0,126928428 |
| 00:19:13 | 0.014386733 | 0,126833678 | 00:19:22 | 0.014313472 | 0,126930543 |
| 00:19:13 | 0.014384845 | 0,126836002 | 00:19:22 | 0.014311757 | 0,126932338 |
| 00:19:13 | 0.014383149 | 0,126838326 | 00:19:22 | 0.014310319 | 0,126934291 |
| 00:19:14 | 0.014381533 | 0,126840521 | 00:19:23 | 0.014308891 | 0,126936444 |
| 00:19:14 | 0.014380124 | 0,126842632 | 00:19:23 | 0.01430741  | 0,126938591 |
| 00:19:14 | 0.014378345 | 0,126844538 | 00:19:23 | 0.014305778 | 0,126940489 |
| 00:19:14 | 0.014376519 | 0,126846723 | 00:19:23 | 0.014304139 | 0,126942646 |
| 00:19:14 | 0.014375107 | 0,1268489   | 00:19:23 | 0.014302554 | 0,126944546 |
| 00:19:14 | 0.014373547 | 0,126850899 | 00:19:24 | 0.014300728 | 0,126946642 |
| 00:19:15 | 0.014372294 | 0,126852924 | 00:19:24 | 0.014298935 | 0,126948586 |
| 00:19:15 | 0.014370867 | 0,12685509  | 00:19:24 | 0.014297667 | 0,126950744 |
| 00:19:15 | 0.01436941  | 0,126857171 | 00:19:24 | 0.014296373 | 0,126952692 |
| 00:19:15 | 0.014368    | 0,126859295 | 00:19:24 | 0.014294915 | 0,126954554 |
| 00:19:15 | 0.014366087 | 0,126861364 | 00:19:25 | 0.014293439 | 0,126956592 |
| 00:19:16 | 0.014364618 | 0,126863627 | 00:19:25 | 0.014291953 | 0,126958808 |
| 00:19:16 | 0.01436273  | 0,126865812 | 00:19:25 | 0.014290628 | 0,126960957 |
| 00:19:16 | 0.014360862 | 0,126867776 | 00:19:25 | 0.014288951 | 0,126963217 |
| 00:19:16 | 0.014359439 | 0,126869743 | 00:19:25 | 0.014287324 | 0,126965468 |
| 00:19:17 | 0.014358    | 0,126871885 | 00:19:26 | 0.014285762 | 0,126967565 |
| 00:19:17 | 0.014356249 | 0,126873796 | 00:19:26 | 0.014284076 | 0,126969875 |

|          |             |             |          |             |             |
|----------|-------------|-------------|----------|-------------|-------------|
| 00:19:26 | 0.014282581 | 0,126972158 | 00:19:35 | 0.014209897 | 0,127068792 |
| 00:19:26 | 0.014280694 | 0,126974193 | 00:19:35 | 0.014208409 | 0,127070812 |
| 00:19:26 | 0.014279208 | 0,126976374 | 00:19:35 | 0.014206953 | 0,127073092 |
| 00:19:27 | 0.014277673 | 0,126978324 | 00:19:36 | 0.014205557 | 0,127075207 |
| 00:19:27 | 0.014275888 | 0,126980362 | 00:19:36 | 0.014204049 | 0,127077434 |
| 00:19:27 | 0.014274188 | 0,126982472 | 00:19:36 | 0.0142024   | 0,127079465 |
| 00:19:27 | 0.014272446 | 0,126984597 | 00:19:36 | 0.014200869 | 0,127081504 |
| 00:19:27 | 0.014271183 | 0,126987017 | 00:19:36 | 0.014199401 | 0,127083592 |
| 00:19:28 | 0.014269405 | 0,126989157 | 00:19:37 | 0.014197447 | 0,127085263 |
| 00:19:28 | 0.014267627 | 0,12699145  | 00:19:37 | 0.014195785 | 0,127087195 |
| 00:19:28 | 0.01426614  | 0,126993815 | 00:19:37 | 0.014194222 | 0,127089395 |
| 00:19:28 | 0.014264657 | 0,126996046 | 00:19:37 | 0.014192609 | 0,127091236 |
| 00:19:28 | 0.014263047 | 0,12699816  | 00:19:37 | 0.01419106  | 0,127093404 |
| 00:19:29 | 0.014261552 | 0,127000317 | 00:19:38 | 0.014189498 | 0,127095394 |
| 00:19:29 | 0.014260059 | 0,127002461 | 00:19:38 | 0.014187984 | 0,127097403 |
| 00:19:29 | 0.014258513 | 0,127004684 | 00:19:38 | 0.014186463 | 0,127099279 |
| 00:19:29 | 0.014256875 | 0,127006686 | 00:19:38 | 0.014185167 | 0,127101466 |
| 00:19:29 | 0.014255556 | 0,127008738 | 00:19:38 | 0.014183591 | 0,127103908 |
| 00:19:30 | 0.014253943 | 0,127010686 | 00:19:39 | 0.014182025 | 0,127105996 |
| 00:19:30 | 0.014252296 | 0,12701285  | 00:19:39 | 0.01418057  | 0,127108128 |
| 00:19:30 | 0.014250615 | 0,127014807 | 00:19:39 | 0.014178999 | 0,127110196 |
| 00:19:30 | 0.014248908 | 0,127016935 | 00:19:39 | 0.014177557 | 0,127112318 |
| 00:19:30 | 0.014247582 | 0,127018878 | 00:19:39 | 0.014175992 | 0,127114791 |
| 00:19:31 | 0.014245998 | 0,127021143 | 00:19:40 | 0.014174508 | 0,127116502 |
| 00:19:31 | 0.014244535 | 0,127023042 | 00:19:40 | 0.014172927 | 0,127118428 |
| 00:19:31 | 0.014242857 | 0,127025308 | 00:19:40 | 0.014171449 | 0,127120243 |
| 00:19:31 | 0.014241529 | 0,127027492 | 00:19:40 | 0.014169682 | 0,127122217 |
| 00:19:31 | 0.014239965 | 0,127029552 | 00:19:40 | 0.014168091 | 0,127124168 |
| 00:19:32 | 0.014238176 | 0,127031622 | 00:19:41 | 0.014166376 | 0,127126077 |
| 00:19:32 | 0.01423669  | 0,127033676 | 00:19:41 | 0.014164513 | 0,127127921 |
| 00:19:32 | 0.014235225 | 0,127035705 | 00:19:41 | 0.014162611 | 0,127129908 |
| 00:19:32 | 0.014233745 | 0,127037763 | 00:19:41 | 0.01416122  | 0,127132041 |
| 00:19:32 | 0.014232013 | 0,127039991 | 00:19:41 | 0.01415965  | 0,127133931 |
| 00:19:33 | 0.014230589 | 0,127041988 | 00:19:42 | 0.014158107 | 0,127136041 |
| 00:19:33 | 0.014228902 | 0,127044374 | 00:19:42 | 0.014156509 | 0,127137809 |
| 00:19:33 | 0.014227526 | 0,127046542 | 00:19:42 | 0.014155041 | 0,127139923 |
| 00:19:33 | 0.014225903 | 0,127048626 | 00:19:42 | 0.014153487 | 0,127142135 |
| 00:19:33 | 0.014224332 | 0,127050516 | 00:19:42 | 0.014151721 | 0,127144155 |
| 00:19:34 | 0.014222577 | 0,127052515 | 00:19:43 | 0.014150063 | 0,127146337 |
| 00:19:34 | 0.014221094 | 0,127054536 | 00:19:43 | 0.014148536 | 0,127148619 |
| 00:19:34 | 0.014219612 | 0,127056713 | 00:19:43 | 0.014146778 | 0,1271505   |
| 00:19:34 | 0.014218057 | 0,127058599 | 00:19:43 | 0.014145076 | 0,127152571 |
| 00:19:34 | 0.014216353 | 0,127060804 | 00:19:43 | 0.014143698 | 0,127154798 |
| 00:19:34 | 0.014214871 | 0,127062892 | 00:19:44 | 0.014141851 | 0,127156745 |
| 00:19:35 | 0.014213272 | 0,127064904 | 00:19:44 | 0.014140161 | 0,12715895  |
| 00:19:35 | 0.014211558 | 0,127066933 | 00:19:44 | 0.014138476 | 0,127161027 |

|          |             |             |          |             |             |
|----------|-------------|-------------|----------|-------------|-------------|
| 00:19:44 | 0.014136856 | 0,127162927 | 00:19:53 | 0.014065459 | 0,127255603 |
| 00:19:44 | 0.014135494 | 0,127165071 | 00:19:53 | 0.014063839 | 0,127257793 |
| 00:19:45 | 0.014133872 | 0,127166957 | 00:19:54 | 0.014062481 | 0,127259705 |
| 00:19:45 | 0.014132503 | 0,127168764 | 00:19:54 | 0.014061198 | 0,127262053 |
| 00:19:45 | 0.014130932 | 0,127170691 | 00:19:54 | 0.014059846 | 0,127264042 |
| 00:19:45 | 0.01412945  | 0,127172691 | 00:19:54 | 0.014058254 | 0,127265969 |
| 00:19:45 | 0.014127859 | 0,127174633 | 00:19:54 | 0.014056855 | 0,127267805 |
| 00:19:46 | 0.014126035 | 0,127176635 | 00:19:55 | 0.014055566 | 0,127269637 |
| 00:19:46 | 0.014124847 | 0,127178689 | 00:19:55 | 0.014053938 | 0,127271463 |
| 00:19:46 | 0.014123016 | 0,127180964 | 00:19:55 | 0.014052355 | 0,127273639 |
| 00:19:46 | 0.014121444 | 0,127182873 | 00:19:55 | 0.014050879 | 0,127275488 |
| 00:19:46 | 0.014119927 | 0,127184731 | 00:19:55 | 0.014049377 | 0,127277258 |
| 00:19:47 | 0.014118195 | 0,127187074 | 00:19:56 | 0.014047707 | 0,127278936 |
| 00:19:47 | 0.014116673 | 0,127189128 | 00:19:56 | 0.014046574 | 0,127281179 |
| 00:19:47 | 0.014114793 | 0,127191114 | 00:19:56 | 0.014045013 | 0,127283292 |
| 00:19:47 | 0.01411336  | 0,127193089 | 00:19:56 | 0.014043764 | 0,127285258 |
| 00:19:47 | 0.014111697 | 0,127195186 | 00:19:56 | 0.014042408 | 0,127287326 |
| 00:19:48 | 0.014110099 | 0,127196912 | 00:19:57 | 0.014040907 | 0,127289115 |
| 00:19:48 | 0.014108636 | 0,127199006 | 00:19:57 | 0.014039191 | 0,127291182 |
| 00:19:48 | 0.014107062 | 0,127201094 | 00:19:57 | 0.01403775  | 0,127293151 |
| 00:19:48 | 0.014105565 | 0,127203161 | 00:19:57 | 0.014036106 | 0,127295195 |
| 00:19:48 | 0.014104119 | 0,127205471 | 00:19:57 | 0.014034555 | 0,127297258 |
| 00:19:49 | 0.01410274  | 0,127207131 | 00:19:58 | 0.014033196 | 0,127299304 |
| 00:19:49 | 0.01410136  | 0,127208961 | 00:19:58 | 0.014031736 | 0,12730132  |
| 00:19:49 | 0.014099517 | 0,12721117  | 00:19:58 | 0.014030317 | 0,127303177 |
| 00:19:49 | 0.014097901 | 0,127213386 | 00:19:58 | 0.014028793 | 0,127305379 |
| 00:19:49 | 0.014096524 | 0,127215499 | 00:19:58 | 0.014027398 | 0,127307217 |
| 00:19:50 | 0.01409478  | 0,12721756  | 00:19:59 | 0.014025598 | 0,127309267 |
| 00:19:50 | 0.014093098 | 0,12721948  | 00:19:59 | 0.014024136 | 0,127311111 |
| 00:19:50 | 0.014091078 | 0,127221492 | 00:19:59 | 0.014022672 | 0,127313019 |
| 00:19:50 | 0.014089663 | 0,127223467 | 00:19:59 | 0.014021123 | 0,127315061 |
| 00:19:50 | 0.014088034 | 0,127225484 | 00:19:59 | 0.014019636 | 0,127317194 |
| 00:19:50 | 0.014086558 | 0,127227225 | 00:20:00 | 0.014018142 | 0,127319173 |
| 00:19:51 | 0.014084896 | 0,127229257 | 00:20:00 | 0.014016766 | 0,127321249 |
| 00:19:51 | 0.014083461 | 0,127231348 | 00:20:00 | 0.01401548  | 0,1273233   |
| 00:19:51 | 0.014082178 | 0,127233298 | 00:20:00 | 0.014013914 | 0,127325076 |
| 00:19:51 | 0.014080931 | 0,127235247 | 00:20:00 | 0.014012488 | 0,127327079 |
| 00:19:52 | 0.014079493 | 0,127237036 | 00:20:01 | 0.014011024 | 0,127329053 |
| 00:19:52 | 0.014078026 | 0,127239083 | 00:20:01 | 0.014009725 | 0,127330766 |
| 00:19:52 | 0.014076514 | 0,127240865 | 00:20:01 | 0.014007942 | 0,127332703 |
| 00:19:52 | 0.014074982 | 0,127243052 | 00:20:01 | 0.014006412 | 0,127334758 |
| 00:19:52 | 0.014073344 | 0,12724525  | 00:20:01 | 0.014004681 | 0,127336655 |
| 00:19:52 | 0.014072119 | 0,127247411 | 00:20:02 | 0.014003193 | 0,127338705 |
| 00:19:53 | 0.014070356 | 0,127249324 | 00:20:02 | 0.014001758 | 0,127340618 |
| 00:19:53 | 0.014068765 | 0,127251194 | 00:20:02 | 0.014000267 | 0,127342478 |
| 00:19:53 | 0.014067237 | 0,127253324 | 00:20:02 | 0.013998944 | 0,127344431 |

|          |             |             |          |             |             |
|----------|-------------|-------------|----------|-------------|-------------|
| 00:20:02 | 0.013997326 | 0,127346316 | 00:20:11 | 0.013928846 | 0,127436786 |
| 00:20:03 | 0.013995799 | 0,127348028 | 00:20:12 | 0.013927386 | 0,127438509 |
| 00:20:03 | 0.013993994 | 0,127349731 | 00:20:12 | 0.013925697 | 0,127440533 |
| 00:20:03 | 0.013992266 | 0,127351815 | 00:20:12 | 0.013924139 | 0,127442667 |
| 00:20:03 | 0.013990868 | 0,127353935 | 00:20:12 | 0.013922797 | 0,127444677 |
| 00:20:03 | 0.013989306 | 0,127356039 | 00:20:12 | 0.013921733 | 0,127446501 |
| 00:20:04 | 0.013987956 | 0,127358128 | 00:20:13 | 0.013919988 | 0,127448494 |
| 00:20:04 | 0.013986456 | 0,12736011  | 00:20:13 | 0.013918636 | 0,127450446 |
| 00:20:04 | 0.013984931 | 0,127362155 | 00:20:13 | 0.013917002 | 0,127452414 |
| 00:20:04 | 0.013983493 | 0,127364162 | 00:20:13 | 0.013915488 | 0,127454486 |
| 00:20:04 | 0.01398228  | 0,127366008 | 00:20:13 | 0.013914034 | 0,127456317 |
| 00:20:05 | 0.013980694 | 0,127368107 | 00:20:14 | 0.013912518 | 0,127458438 |
| 00:20:05 | 0.013979055 | 0,127369903 | 00:20:14 | 0.013911097 | 0,127460514 |
| 00:20:05 | 0.013977311 | 0,127371669 | 00:20:14 | 0.013909715 | 0,127462593 |
| 00:20:05 | 0.013975798 | 0,127373716 | 00:20:14 | 0.013908355 | 0,127464474 |
| 00:20:05 | 0.013974283 | 0,127375724 | 00:20:14 | 0.013907029 | 0,127466404 |
| 00:20:06 | 0.013972702 | 0,127377734 | 00:20:15 | 0.013905815 | 0,127468399 |
| 00:20:06 | 0.013971502 | 0,127379669 | 00:20:15 | 0.013904309 | 0,127470653 |
| 00:20:06 | 0.013970022 | 0,127381812 | 00:20:15 | 0.013902642 | 0,1274725   |
| 00:20:06 | 0.01396845  | 0,127383783 | 00:20:15 | 0.013901051 | 0,127474284 |
| 00:20:06 | 0.013966765 | 0,127385793 | 00:20:15 | 0.013899487 | 0,127476245 |
| 00:20:07 | 0.013965439 | 0,127387842 | 00:20:16 | 0.013897978 | 0,127478065 |
| 00:20:07 | 0.013964118 | 0,127389941 | 00:20:16 | 0.013896492 | 0,127480114 |
| 00:20:07 | 0.0139627   | 0,127391808 | 00:20:16 | 0.013895141 | 0,127482275 |
| 00:20:07 | 0.013961165 | 0,127393996 | 00:20:16 | 0.013893637 | 0,127484081 |
| 00:20:07 | 0.013959595 | 0,127395904 | 00:20:16 | 0.013892418 | 0,127486059 |
| 00:20:07 | 0.013958217 | 0,127397744 | 00:20:17 | 0.013891082 | 0,127487704 |
| 00:20:08 | 0.013956718 | 0,12739959  | 00:20:17 | 0.013889682 | 0,12748955  |
| 00:20:08 | 0.013955339 | 0,127401489 | 00:20:17 | 0.013888236 | 0,127491421 |
| 00:20:08 | 0.013953891 | 0,127403411 | 00:20:17 | 0.013886697 | 0,127493535 |
| 00:20:08 | 0.013952655 | 0,127405456 | 00:20:17 | 0.013885428 | 0,127495909 |
| 00:20:08 | 0.013951194 | 0,127407474 | 00:20:18 | 0.013883738 | 0,127498128 |
| 00:20:09 | 0.013949981 | 0,127409418 | 00:20:18 | 0.013882115 | 0,127500297 |
| 00:20:09 | 0.013948346 | 0,127411304 | 00:20:18 | 0.013880718 | 0,127502403 |
| 00:20:09 | 0.013946799 | 0,127413228 | 00:20:18 | 0.013879301 | 0,127504355 |
| 00:20:09 | 0.01394517  | 0,127415045 | 00:20:18 | 0.013877953 | 0,12750625  |
| 00:20:09 | 0.013943901 | 0,127417098 | 00:20:19 | 0.013876309 | 0,127508335 |
| 00:20:10 | 0.013942276 | 0,127419172 | 00:20:19 | 0.013874829 | 0,12751026  |
| 00:20:10 | 0.013940694 | 0,127420948 | 00:20:19 | 0.013873517 | 0,127512427 |
| 00:20:10 | 0.013939211 | 0,127422909 | 00:20:19 | 0.013871676 | 0,127514388 |
| 00:20:10 | 0.013937532 | 0,127424928 | 00:20:19 | 0.013870143 | 0,127516312 |
| 00:20:10 | 0.013935981 | 0,127426847 | 00:20:20 | 0.01386868  | 0,127518379 |
| 00:20:11 | 0.013934615 | 0,127428818 | 00:20:20 | 0.013867101 | 0,127520006 |
| 00:20:11 | 0.013933089 | 0,127430826 | 00:20:20 | 0.013865246 | 0,12752209  |
| 00:20:11 | 0.013931826 | 0,127433098 | 00:20:20 | 0.013863611 | 0,127524136 |
| 00:20:11 | 0.013930419 | 0,127435058 | 00:20:20 | 0.013862069 | 0,12752624  |

|          |             |              |          |             |             |
|----------|-------------|--------------|----------|-------------|-------------|
| 00:20:21 | 0.013860583 | 0,127528064  | 00:20:30 | 0.013792646 | 0,127615844 |
| 00:20:21 | 0.013858919 | 0,127529922  | 00:20:30 | 0.01379134  | 0,127617809 |
| 00:20:21 | 0.013857491 | 0,127531943  | 00:20:30 | 0.013789829 | 0,127619642 |
| 00:20:21 | 0.013855908 | 0,127533818  | 00:20:30 | 0.013788488 | 0,127621553 |
| 00:20:21 | 0.013854574 | 0,12753579   | 00:20:30 | 0.013787025 | 0,127623265 |
| 00:20:22 | 0.013852914 | 0,1275375    | 00:20:31 | 0.013785825 | 0,127625295 |
| 00:20:22 | 0.01385124  | 0,127539215  | 00:20:31 | 0.013784223 | 0,127627161 |
| 00:20:22 | 0.013849836 | 0,127541059  | 00:20:31 | 0.013782792 | 0,127629283 |
| 00:20:22 | 0.013848172 | 0,127542834  | 00:20:31 | 0.013781364 | 0,127631248 |
| 00:20:22 | 0.013846619 | 0,127544747  | 00:20:31 | 0.013780127 | 0,127633075 |
| 00:20:23 | 0.013845085 | 0,127546569  | 00:20:32 | 0.013778718 | 0,12763485  |
| 00:20:23 | 0.013843581 | 0,127548603  | 00:20:32 | 0.01377736  | 0,127636917 |
| 00:20:23 | 0.013841791 | 0,127550458  | 00:20:32 | 0.013775871 | 0,127638854 |
| 00:20:23 | 0.013840301 | 0,127552475  | 00:20:32 | 0.013774422 | 0,127640678 |
| 00:20:23 | 0.013838747 | 0,127554338  | 00:20:32 | 0.01377301  | 0,127642486 |
| 00:20:23 | 0.013837179 | 0,12755618   | 00:20:33 | 0.013771694 | 0,127644539 |
| 00:20:24 | 0.013835766 | 0,12755825   | 00:20:33 | 0.013770202 | 0,127646401 |
| 00:20:24 | 0.013834713 | 0,127560272  | 00:20:33 | 0.013768773 | 0,12764831  |
| 00:20:24 | 0.013833391 | 0,127562125  | 00:20:33 | 0.013767286 | 0,127650311 |
| 00:20:24 | 0.013831825 | 0,127564298  | 00:20:33 | 0.013765841 | 0,127652374 |
| 00:20:25 | 0.013830305 | 0,1275665794 | 00:20:34 | 0.013764609 | 0,127654474 |
| 00:20:25 | 0.013828904 | 0,127567779  | 00:20:34 | 0.013763166 | 0,127656394 |
| 00:20:25 | 0.013827508 | 0,127569817  | 00:20:34 | 0.013761675 | 0,127658127 |
| 00:20:25 | 0.013826069 | 0,127571482  | 00:20:34 | 0.013760021 | 0,127660172 |
| 00:20:25 | 0.013824712 | 0,127573302  | 00:20:34 | 0.013758653 | 0,127662094 |
| 00:20:25 | 0.013823246 | 0,127575216  | 00:20:35 | 0.013757154 | 0,127664018 |
| 00:20:26 | 0.013821308 | 0,127577132  | 00:20:35 | 0.013755545 | 0,127665966 |
| 00:20:26 | 0.01381968  | 0,127579048  | 00:20:35 | 0.013754173 | 0,127667934 |
| 00:20:26 | 0.013818241 | 0,127581056  | 00:20:35 | 0.013752566 | 0,127669721 |
| 00:20:26 | 0.013817077 | 0,127583378  | 00:20:35 | 0.013751006 | 0,127671694 |
| 00:20:27 | 0.013815671 | 0,127585118  | 00:20:36 | 0.013749499 | 0,127673721 |
| 00:20:27 | 0.01381434  | 0,127587056  | 00:20:36 | 0.013748148 | 0,127675577 |
| 00:20:27 | 0.013813055 | 0,127588839  | 00:20:36 | 0.013746618 | 0,127677518 |
| 00:20:27 | 0.013811424 | 0,127590882  | 00:20:36 | 0.013745059 | 0,127679537 |
| 00:20:27 | 0.013809806 | 0,127592885  | 00:20:36 | 0.013743651 | 0,127681232 |
| 00:20:27 | 0.013808433 | 0,127594963  | 00:20:37 | 0.013742248 | 0,127683154 |
| 00:20:28 | 0.013806923 | 0,127596833  | 00:20:37 | 0.013740714 | 0,127684921 |
| 00:20:28 | 0.01380586  | 0,127598778  | 00:20:37 | 0.013739281 | 0,127686807 |
| 00:20:28 | 0.013804546 | 0,127600724  | 00:20:37 | 0.013737752 | 0,127688642 |
| 00:20:28 | 0.013803136 | 0,127602383  | 00:20:37 | 0.013736055 | 0,127690502 |
| 00:20:28 | 0.013801468 | 0,127604133  | 00:20:38 | 0.013734447 | 0,12769235  |
| 00:20:29 | 0.013799982 | 0,127605969  | 00:20:38 | 0.013733026 | 0,127694282 |
| 00:20:29 | 0.013798764 | 0,127608022  | 00:20:38 | 0.013731486 | 0,127696072 |
| 00:20:29 | 0.013797289 | 0,127609988  | 00:20:38 | 0.013729788 | 0,12769803  |
| 00:20:29 | 0.013795738 | 0,127611896  | 00:20:38 | 0.013728354 | 0,127699874 |
| 00:20:29 | 0.013794163 | 0,127613998  | 00:20:39 | 0.01372672  | 0,127701778 |

|          |             |             |          |             |             |
|----------|-------------|-------------|----------|-------------|-------------|
| 00:20:39 | 0.013725415 | 0,127703742 | 00:20:48 | 0.013657876 | 0,127792368 |
| 00:20:39 | 0.013724062 | 0,127705639 | 00:20:48 | 0.013656525 | 0,127794327 |
| 00:20:39 | 0.013722563 | 0,127707556 | 00:20:48 | 0.013655317 | 0,127796378 |
| 00:20:39 | 0.013720807 | 0,127709633 | 00:20:48 | 0.013653892 | 0,127798376 |
| 00:20:40 | 0.013719232 | 0,127711555 | 00:20:49 | 0.013652344 | 0,127800422 |
| 00:20:40 | 0.01371768  | 0,127713179 | 00:20:49 | 0.013650752 | 0,127802432 |
| 00:20:40 | 0.013715819 | 0,127715258 | 00:20:49 | 0.013649263 | 0,127804198 |
| 00:20:40 | 0.013714461 | 0,127717063 | 00:20:49 | 0.013647685 | 0,127806125 |
| 00:20:40 | 0.013712944 | 0,127719084 | 00:20:49 | 0.013646213 | 0,127808078 |
| 00:20:40 | 0.013711499 | 0,127720968 | 00:20:50 | 0.013644688 | 0,127810029 |
| 00:20:41 | 0.013709958 | 0,127722834 | 00:20:50 | 0.013643236 | 0,127812129 |
| 00:20:41 | 0.013708543 | 0,12772478  | 00:20:50 | 0.013641937 | 0,127813822 |
| 00:20:41 | 0.01370724  | 0,127726591 | 00:20:50 | 0.013640432 | 0,127815688 |
| 00:20:41 | 0.013705597 | 0,127728518 | 00:20:50 | 0.013639003 | 0,127817363 |
| 00:20:41 | 0.013704099 | 0,127730467 | 00:20:51 | 0.013637617 | 0,127819212 |
| 00:20:42 | 0.013702525 | 0,127732359 | 00:20:51 | 0.013636127 | 0,12782117  |
| 00:20:42 | 0.01370131  | 0,127734612 | 00:20:51 | 0.013634675 | 0,127823273 |
| 00:20:42 | 0.013699831 | 0,127736649 | 00:20:51 | 0.013633148 | 0,127825035 |
| 00:20:42 | 0.013698351 | 0,127738679 | 00:20:51 | 0.013631666 | 0,12782717  |
| 00:20:43 | 0.013697017 | 0,127740484 | 00:20:52 | 0.013630094 | 0,127829348 |
| 00:20:43 | 0.013695501 | 0,127742294 | 00:20:52 | 0.013628573 | 0,127831261 |
| 00:20:43 | 0.013694047 | 0,127744153 | 00:20:52 | 0.013627079 | 0,12783303  |
| 00:20:43 | 0.013692638 | 0,127746131 | 00:20:52 | 0.013625577 | 0,127834842 |
| 00:20:43 | 0.013691035 | 0,127748168 | 00:20:52 | 0.013624091 | 0,127836761 |
| 00:20:43 | 0.013689528 | 0,127750226 | 00:20:53 | 0.013622413 | 0,127838869 |
| 00:20:44 | 0.013688196 | 0,127752133 | 00:20:53 | 0.013621241 | 0,127840618 |
| 00:20:44 | 0.01368646  | 0,127753948 | 00:20:53 | 0.013619881 | 0,127842321 |
| 00:20:44 | 0.013684842 | 0,12775581  | 00:20:53 | 0.013618722 | 0,127844578 |
| 00:20:44 | 0.013683385 | 0,12775771  | 00:20:53 | 0.013617213 | 0,127846576 |
| 00:20:45 | 0.013682098 | 0,127759505 | 00:20:54 | 0.01361592  | 0,127848536 |
| 00:20:45 | 0.01368066  | 0,127761523 | 00:20:54 | 0.013614527 | 0,127850343 |
| 00:20:45 | 0.013679136 | 0,127763356 | 00:20:54 | 0.013613038 | 0,127852414 |
| 00:20:45 | 0.013677745 | 0,127765342 | 00:20:54 | 0.013611724 | 0,12785439  |
| 00:20:45 | 0.013676365 | 0,127767129 | 00:20:54 | 0.013610254 | 0,127856273 |
| 00:20:45 | 0.013674931 | 0,127769062 | 00:20:55 | 0.013608845 | 0,127858002 |
| 00:20:46 | 0.013673454 | 0,127770968 | 00:20:55 | 0.013607585 | 0,127859979 |
| 00:20:46 | 0.013671995 | 0,127772907 | 00:20:55 | 0.013606354 | 0,127861981 |
| 00:20:46 | 0.013670616 | 0,127774915 | 00:20:55 | 0.013605286 | 0,127863632 |
| 00:20:46 | 0.013669121 | 0,127777026 | 00:20:55 | 0.013604017 | 0,127865591 |
| 00:20:46 | 0.013667652 | 0,127778922 | 00:20:56 | 0.013602781 | 0,127867529 |
| 00:20:47 | 0.013666185 | 0,127780959 | 00:20:56 | 0.013601304 | 0,127869533 |
| 00:20:47 | 0.013665224 | 0,127782741 | 00:20:56 | 0.013599862 | 0,127871318 |
| 00:20:47 | 0.013663739 | 0,127784545 | 00:20:56 | 0.013598353 | 0,127873134 |
| 00:20:47 | 0.013662402 | 0,127786664 | 00:20:56 | 0.013596886 | 0,127874809 |
| 00:20:47 | 0.013660826 | 0,127788554 | 00:20:57 | 0.013595607 | 0,127876736 |
| 00:20:48 | 0.013659361 | 0,127790433 | 00:20:57 | 0.013594366 | 0,127878331 |

|          |             |             |          |             |             |
|----------|-------------|-------------|----------|-------------|-------------|
| 00:20:57 | 0.0135929   | 0,12788026  | 00:21:06 | 0.013528656 | 0,127965961 |
| 00:20:57 | 0.0135914   | 0,127882192 | 00:21:06 | 0.013527235 | 0,127967762 |
| 00:20:57 | 0.013589897 | 0,127884123 | 00:21:06 | 0.013525773 | 0,127969719 |
| 00:20:58 | 0.013588315 | 0,127886121 | 00:21:07 | 0.013524113 | 0,127971794 |
| 00:20:58 | 0.013586663 | 0,12788804  | 00:21:07 | 0.013522584 | 0,12797346  |
| 00:20:58 | 0.013585228 | 0,127889644 | 00:21:07 | 0.013521409 | 0,127975525 |
| 00:20:58 | 0.013583979 | 0,127891447 | 00:21:07 | 0.013520117 | 0,127977087 |
| 00:20:58 | 0.013582662 | 0,127893396 | 00:21:07 | 0.013518785 | 0,127978871 |
| 00:20:58 | 0.013581207 | 0,127895538 | 00:21:08 | 0.013517137 | 0,127980705 |
| 00:20:59 | 0.013579791 | 0,127897278 | 00:21:08 | 0.013515649 | 0,12798229  |
| 00:20:59 | 0.013578542 | 0,127898859 | 00:21:08 | 0.013514255 | 0,12798421  |
| 00:20:59 | 0.013577075 | 0,127900474 | 00:21:08 | 0.013512772 | 0,127986006 |
| 00:20:59 | 0.013575667 | 0,127902547 | 00:21:08 | 0.013511404 | 0,127987968 |
| 00:21:00 | 0.013574291 | 0,127904535 | 00:21:09 | 0.013510141 | 0,12798975  |
| 00:21:00 | 0.013572827 | 0,127906495 | 00:21:09 | 0.013508888 | 0,127991792 |
| 00:21:00 | 0.013571271 | 0,127908359 | 00:21:09 | 0.013507481 | 0,127993819 |
| 00:21:00 | 0.013569703 | 0,127910397 | 00:21:09 | 0.013506225 | 0,12799588  |
| 00:21:00 | 0.013568223 | 0,127912193 | 00:21:09 | 0.013505131 | 0,127997858 |
| 00:21:00 | 0.013566907 | 0,127914119 | 00:21:10 | 0.013503815 | 0,127999636 |
| 00:21:01 | 0.013565607 | 0,127916182 | 00:21:10 | 0.013502234 | 0,128001468 |
| 00:21:01 | 0.013564213 | 0,127918023 | 00:21:10 | 0.013500897 | 0,128003189 |
| 00:21:01 | 0.013562624 | 0,127919785 | 00:21:10 | 0.013499752 | 0,128005016 |
| 00:21:01 | 0.013561143 | 0,127921567 | 00:21:10 | 0.013498518 | 0,128006768 |
| 00:21:01 | 0.013559947 | 0,127923214 | 00:21:11 | 0.013497186 | 0,128008742 |
| 00:21:02 | 0.013558449 | 0,127924988 | 00:21:11 | 0.013495876 | 0,12801059  |
| 00:21:02 | 0.013557334 | 0,127926837 | 00:21:11 | 0.013494539 | 0,128012277 |
| 00:21:02 | 0.013555668 | 0,127928704 | 00:21:11 | 0.013493268 | 0,128014299 |
| 00:21:02 | 0.013554162 | 0,127930442 | 00:21:11 | 0.013491821 | 0,128016116 |
| 00:21:02 | 0.013552835 | 0,127932217 | 00:21:12 | 0.013490297 | 0,128017965 |
| 00:21:03 | 0.013551439 | 0,127934265 | 00:21:12 | 0.013488849 | 0,128019769 |
| 00:21:03 | 0.01355018  | 0,127936056 | 00:21:12 | 0.013487737 | 0,128021701 |
| 00:21:03 | 0.013548851 | 0,127938002 | 00:21:12 | 0.013486112 | 0,128023628 |
| 00:21:03 | 0.013547666 | 0,12794     | 00:21:12 | 0.013484631 | 0,128025419 |
| 00:21:03 | 0.01354638  | 0,127941784 | 00:21:13 | 0.013483213 | 0,128027428 |
| 00:21:04 | 0.013544995 | 0,127943755 | 00:21:13 | 0.013481635 | 0,128029301 |
| 00:21:04 | 0.013543485 | 0,127945533 | 00:21:13 | 0.013480433 | 0,128031143 |
| 00:21:04 | 0.01354226  | 0,127947385 | 00:21:13 | 0.013478926 | 0,128033047 |
| 00:21:04 | 0.013540832 | 0,127949362 | 00:21:13 | 0.013477759 | 0,128034621 |
| 00:21:04 | 0.013539643 | 0,127951387 | 00:21:14 | 0.013476333 | 0,128036467 |
| 00:21:05 | 0.013538529 | 0,127953217 | 00:21:14 | 0.013475123 | 0,128038397 |
| 00:21:05 | 0.013536976 | 0,127955319 | 00:21:14 | 0.01347378  | 0,128040289 |
| 00:21:05 | 0.013535515 | 0,127957071 | 00:21:14 | 0.013472459 | 0,128042083 |
| 00:21:05 | 0.013534186 | 0,12795898  | 00:21:14 | 0.013471134 | 0,128043881 |
| 00:21:05 | 0.013533003 | 0,127960747 | 00:21:15 | 0.013469869 | 0,128045888 |
| 00:21:06 | 0.013531334 | 0,127962308 | 00:21:15 | 0.013468577 | 0,128047745 |
| 00:21:06 | 0.013530005 | 0,12796413  | 00:21:15 | 0.01346712  | 0,128049616 |

|          |             |             |          |             |             |
|----------|-------------|-------------|----------|-------------|-------------|
| 00:21:15 | 0.013465676 | 0,128051571 | 00:21:24 | 0.013400883 | 0,128138816 |
| 00:21:15 | 0.013464251 | 0,128053438 | 00:21:24 | 0.013399788 | 0,128140761 |
| 00:21:15 | 0.013462783 | 0,128055482 | 00:21:25 | 0.013398536 | 0,128142414 |
| 00:21:16 | 0.013461455 | 0,128057505 | 00:21:25 | 0.013397381 | 0,128144324 |
| 00:21:16 | 0.013460021 | 0,12805908  | 00:21:25 | 0.013396031 | 0,128146575 |
| 00:21:16 | 0.013458323 | 0,128060992 | 00:21:25 | 0.013394603 | 0,128148565 |
| 00:21:16 | 0.013456847 | 0,128062968 | 00:21:25 | 0.013393281 | 0,128150648 |
| 00:21:16 | 0.013455441 | 0,128064959 | 00:21:26 | 0.013391912 | 0,12815232  |
| 00:21:17 | 0.013453797 | 0,128067176 | 00:21:26 | 0.013390422 | 0,128154246 |
| 00:21:17 | 0.013452345 | 0,128069249 | 00:21:26 | 0.013389352 | 0,128156321 |
| 00:21:17 | 0.013451094 | 0,128071122 | 00:21:26 | 0.013388004 | 0,128158161 |
| 00:21:17 | 0.013449542 | 0,12807295  | 00:21:26 | 0.013386621 | 0,128160125 |
| 00:21:18 | 0.01344798  | 0,128074699 | 00:21:27 | 0.013385236 | 0,128161952 |
| 00:21:18 | 0.013446514 | 0,12807666  | 00:21:27 | 0.013384148 | 0,128164041 |
| 00:21:18 | 0.013445243 | 0,128078395 | 00:21:27 | 0.013382885 | 0,128165915 |
| 00:21:18 | 0.013443989 | 0,128080356 | 00:21:27 | 0.013381411 | 0,128167884 |
| 00:21:18 | 0.013442638 | 0,128082258 | 00:21:27 | 0.013380186 | 0,128169918 |
| 00:21:18 | 0.013441291 | 0,128084263 | 00:21:28 | 0.013378939 | 0,128171611 |
| 00:21:19 | 0.013440021 | 0,128086174 | 00:21:28 | 0.013377638 | 0,128173529 |
| 00:21:19 | 0.013438593 | 0,128088161 | 00:21:28 | 0.013376207 | 0,128175295 |
| 00:21:19 | 0.013437151 | 0,128089946 | 00:21:28 | 0.013374821 | 0,128177068 |
| 00:21:19 | 0.013435846 | 0,128091881 | 00:21:28 | 0.013373382 | 0,128178666 |
| 00:21:19 | 0.01343403  | 0,128093938 | 00:21:29 | 0.013371834 | 0,12818061  |
| 00:21:20 | 0.013432623 | 0,128095683 | 00:21:29 | 0.013370622 | 0,128182433 |
| 00:21:20 | 0.01343122  | 0,128097534 | 00:21:29 | 0.013369352 | 0,12818423  |
| 00:21:20 | 0.013429704 | 0,128099536 | 00:21:29 | 0.01336824  | 0,128185933 |
| 00:21:20 | 0.013428373 | 0,128101305 | 00:21:29 | 0.013366894 | 0,128187839 |
| 00:21:20 | 0.013426956 | 0,128103134 | 00:21:30 | 0.013365173 | 0,128189457 |
| 00:21:21 | 0.013425531 | 0,128105202 | 00:21:30 | 0.013363657 | 0,128191329 |
| 00:21:21 | 0.013424252 | 0,128106901 | 00:21:30 | 0.013362441 | 0,128193237 |
| 00:21:21 | 0.013422954 | 0,128108725 | 00:21:30 | 0.013361385 | 0,128194849 |
| 00:21:21 | 0.013421519 | 0,128110588 | 00:21:30 | 0.013359794 | 0,128196649 |
| 00:21:21 | 0.01341995  | 0,128112464 | 00:21:31 | 0.013358627 | 0,128198477 |
| 00:21:22 | 0.013418569 | 0,128114145 | 00:21:31 | 0.013357366 | 0,128200419 |
| 00:21:22 | 0.013417119 | 0,12811642  | 00:21:31 | 0.013356073 | 0,128202019 |
| 00:21:22 | 0.013415637 | 0,128118175 | 00:21:31 | 0.013354536 | 0,128203543 |
| 00:21:22 | 0.013414308 | 0,128120322 | 00:21:31 | 0.013353244 | 0,128205443 |
| 00:21:22 | 0.013412821 | 0,128122272 | 00:21:32 | 0.013351918 | 0,128207293 |
| 00:21:23 | 0.013411522 | 0,12812388  | 00:21:32 | 0.013350463 | 0,128209227 |
| 00:21:23 | 0.013410278 | 0,128126074 | 00:21:32 | 0.013349066 | 0,128210972 |
| 00:21:23 | 0.013408703 | 0,128127862 | 00:21:32 | 0.013347756 | 0,128212907 |
| 00:21:23 | 0.013407495 | 0,128129746 | 00:21:32 | 0.013346202 | 0,128214678 |
| 00:21:23 | 0.013406118 | 0,128131545 | 00:21:33 | 0.01334509  | 0,128216546 |
| 00:21:24 | 0.013404868 | 0,128133148 | 00:21:33 | 0.013343903 | 0,128218478 |
| 00:21:24 | 0.013403358 | 0,128134985 | 00:21:33 | 0.013342805 | 0,128220323 |
| 00:21:24 | 0.01340187  | 0,128136796 | 00:21:33 | 0.01334146  | 0,128221931 |

|          |             |             |          |             |             |
|----------|-------------|-------------|----------|-------------|-------------|
| 00:21:33 | 0.013339926 | 0,128223887 | 00:21:42 | 0.013278754 | 0,128307868 |
| 00:21:33 | 0.013338589 | 0,128225641 | 00:21:43 | 0.013277483 | 0,128309541 |
| 00:21:34 | 0.013337091 | 0,128227419 | 00:21:43 | 0.013276182 | 0,128311255 |
| 00:21:34 | 0.013335731 | 0,12822954  | 00:21:43 | 0.013274859 | 0,128313023 |
| 00:21:34 | 0.013334379 | 0,128231633 | 00:21:43 | 0.013273776 | 0,128314646 |
| 00:21:34 | 0.0133331   | 0,128233332 | 00:21:43 | 0.013272352 | 0,128316454 |
| 00:21:35 | 0.013331619 | 0,128235087 | 00:21:44 | 0.013271112 | 0,128318155 |
| 00:21:35 | 0.013329967 | 0,128237096 | 00:21:44 | 0.013269665 | 0,128319734 |
| 00:21:35 | 0.013328657 | 0,128238944 | 00:21:44 | 0.013268415 | 0,128321319 |
| 00:21:35 | 0.013327444 | 0,128240908 | 00:21:44 | 0.013267238 | 0,128323224 |
| 00:21:35 | 0.013326067 | 0,128242648 | 00:21:44 | 0.01326601  | 0,128325173 |
| 00:21:35 | 0.013325036 | 0,128244475 | 00:21:45 | 0.013264675 | 0,128326878 |
| 00:21:36 | 0.013323609 | 0,128246414 | 00:21:45 | 0.013263457 | 0,128328714 |
| 00:21:36 | 0.013322314 | 0,128248003 | 00:21:45 | 0.01326217  | 0,128330496 |
| 00:21:36 | 0.013320827 | 0,128249582 | 00:21:45 | 0.013260998 | 0,128332259 |
| 00:21:36 | 0.01331961  | 0,128251398 | 00:21:45 | 0.013259524 | 0,128334094 |
| 00:21:36 | 0.013318141 | 0,128253074 | 00:21:46 | 0.013258223 | 0,128335933 |
| 00:21:37 | 0.013316976 | 0,128254759 | 00:21:46 | 0.013256969 | 0,128337937 |
| 00:21:37 | 0.01331568  | 0,128256461 | 00:21:46 | 0.013255774 | 0,128339657 |
| 00:21:37 | 0.013314331 | 0,128258214 | 00:21:46 | 0.013254448 | 0,128341483 |
| 00:21:37 | 0.01331292  | 0,128259863 | 00:21:46 | 0.013253012 | 0,128343209 |
| 00:21:37 | 0.013311812 | 0,128261541 | 00:21:47 | 0.013251688 | 0,128344745 |
| 00:21:38 | 0.013310278 | 0,128263453 | 00:21:47 | 0.01325035  | 0,128346419 |
| 00:21:38 | 0.013308948 | 0,128265321 | 00:21:47 | 0.01324922  | 0,128348428 |
| 00:21:38 | 0.013307741 | 0,128267216 | 00:21:47 | 0.013247842 | 0,128350409 |
| 00:21:38 | 0.0133065   | 0,128268828 | 00:21:47 | 0.013246539 | 0,128352114 |
| 00:21:38 | 0.013305159 | 0,128270676 | 00:21:48 | 0.013245553 | 0,128353984 |
| 00:21:39 | 0.013303923 | 0,128272458 | 00:21:48 | 0.01324424  | 0,128355611 |
| 00:21:39 | 0.013302528 | 0,128274554 | 00:21:48 | 0.013243164 | 0,128357455 |
| 00:21:39 | 0.013301023 | 0,128276435 | 00:21:48 | 0.013241847 | 0,12835928  |
| 00:21:39 | 0.013300153 | 0,128278317 | 00:21:48 | 0.013240393 | 0,128361314 |
| 00:21:39 | 0.013298742 | 0,12828014  | 00:21:49 | 0.013239088 | 0,128363129 |
| 00:21:40 | 0.013297497 | 0,128282236 | 00:21:49 | 0.013237993 | 0,128365133 |
| 00:21:40 | 0.013295922 | 0,128284089 | 00:21:49 | 0.013236666 | 0,128367055 |
| 00:21:40 | 0.013294711 | 0,12828585  | 00:21:49 | 0.013235313 | 0,128368992 |
| 00:21:40 | 0.01329357  | 0,128287706 | 00:21:49 | 0.013233955 | 0,128370832 |
| 00:21:40 | 0.013292297 | 0,128289725 | 00:21:50 | 0.013232743 | 0,128372803 |
| 00:21:41 | 0.013290631 | 0,128291554 | 00:21:50 | 0.013231519 | 0,128374439 |
| 00:21:41 | 0.013289298 | 0,12829339  | 00:21:50 | 0.013230341 | 0,128376267 |
| 00:21:41 | 0.013288094 | 0,128295018 | 00:21:50 | 0.013228916 | 0,128378075 |
| 00:21:41 | 0.013286754 | 0,1282969   | 00:21:50 | 0.013227659 | 0,128379985 |
| 00:21:41 | 0.013285654 | 0,128298776 | 00:21:50 | 0.013226356 | 0,128381572 |
| 00:21:42 | 0.01328432  | 0,128300711 | 00:21:51 | 0.013225082 | 0,1283835   |
| 00:21:42 | 0.01328276  | 0,128302532 | 00:21:51 | 0.01322377  | 0,128385443 |
| 00:21:42 | 0.013281708 | 0,128304253 | 00:21:51 | 0.013222755 | 0,128387209 |
| 00:21:42 | 0.013280369 | 0,128306045 | 00:21:51 | 0.013221346 | 0,128389039 |

|          |             |             |          |             |             |
|----------|-------------|-------------|----------|-------------|-------------|
| 00:21:51 | 0.01322023  | 0,128390776 | 00:22:01 | 0.013159032 | 0,128471875 |
| 00:21:52 | 0.013218879 | 0,12839242  | 00:22:01 | 0.013157832 | 0,128473825 |
| 00:21:52 | 0.013217481 | 0,128394613 | 00:22:01 | 0.013156425 | 0,128475675 |
| 00:21:52 | 0.01321594  | 0,128396396 | 00:22:01 | 0.013155476 | 0,128477405 |
| 00:21:52 | 0.013214566 | 0,128398004 | 00:22:01 | 0.01315424  | 0,128479217 |
| 00:21:53 | 0.01321331  | 0,128399889 | 00:22:02 | 0.01315305  | 0,12848086  |
| 00:21:53 | 0.013212205 | 0,128401606 | 00:22:02 | 0.013151845 | 0,128482746 |
| 00:21:53 | 0.01321106  | 0,128403474 | 00:22:02 | 0.013150215 | 0,128484503 |
| 00:21:53 | 0.013209874 | 0,128404916 | 00:22:02 | 0.0131489   | 0,128486154 |
| 00:21:53 | 0.013208432 | 0,128406811 | 00:22:02 | 0.013147468 | 0,128488058 |
| 00:21:53 | 0.013207096 | 0,128408651 | 00:22:03 | 0.013146126 | 0,12848994  |
| 00:21:54 | 0.013206048 | 0,128410488 | 00:22:03 | 0.013144999 | 0,128491826 |
| 00:21:54 | 0.013204695 | 0,128412214 | 00:22:03 | 0.013143688 | 0,128493566 |
| 00:21:54 | 0.013203415 | 0,128414137 | 00:22:03 | 0.013142461 | 0,128495356 |
| 00:21:54 | 0.013201988 | 0,128415994 | 00:22:03 | 0.01314112  | 0,12849714  |
| 00:21:55 | 0.013200444 | 0,128417843 | 00:22:04 | 0.01313943  | 0,128499002 |
| 00:21:55 | 0.013199364 | 0,128419704 | 00:22:04 | 0.013138096 | 0,1285008   |
| 00:21:55 | 0.013198163 | 0,128421432 | 00:22:04 | 0.013136761 | 0,128502715 |
| 00:21:55 | 0.013196932 | 0,128423125 | 00:22:04 | 0.013135164 | 0,128504482 |
| 00:21:55 | 0.013195741 | 0,128424724 | 00:22:04 | 0.013133954 | 0,1285063   |
| 00:21:55 | 0.01319448  | 0,128426503 | 00:22:05 | 0.013132562 | 0,128508261 |
| 00:21:56 | 0.013193098 | 0,128428446 | 00:22:05 | 0.013131216 | 0,128509851 |
| 00:21:56 | 0.013191418 | 0,128430188 | 00:22:05 | 0.013129812 | 0,128511451 |
| 00:21:56 | 0.013190225 | 0,128432082 | 00:22:05 | 0.013128732 | 0,128513091 |
| 00:21:56 | 0.013188804 | 0,128433678 | 00:22:05 | 0.013127343 | 0,128515051 |
| 00:21:56 | 0.013187431 | 0,128435402 | 00:22:06 | 0.013126133 | 0,128516945 |
| 00:21:57 | 0.013185979 | 0,128437095 | 00:22:06 | 0.013124835 | 0,128518787 |
| 00:21:57 | 0.013184605 | 0,128438727 | 00:22:06 | 0.013123492 | 0,128520516 |
| 00:21:57 | 0.013183326 | 0,128440522 | 00:22:06 | 0.013122076 | 0,128522108 |
| 00:21:57 | 0.013182012 | 0,128442425 | 00:22:06 | 0.0131208   | 0,128523697 |
| 00:21:57 | 0.013180751 | 0,128444195 | 00:22:07 | 0.013119478 | 0,128525545 |
| 00:21:58 | 0.013179358 | 0,128445858 | 00:22:07 | 0.013118233 | 0,128527341 |
| 00:21:58 | 0.01317791  | 0,128447574 | 00:22:07 | 0.013117061 | 0,128529172 |
| 00:21:58 | 0.013176481 | 0,128449404 | 00:22:07 | 0.013115728 | 0,128530964 |
| 00:21:58 | 0.013175217 | 0,128450897 | 00:22:07 | 0.013114323 | 0,128532726 |
| 00:21:58 | 0.013174017 | 0,128452735 | 00:22:08 | 0.013113088 | 0,128534772 |
| 00:21:59 | 0.013172309 | 0,128454275 | 00:22:08 | 0.013111682 | 0,128536561 |
| 00:21:59 | 0.013171172 | 0,128456073 | 00:22:08 | 0.013110324 | 0,128538339 |
| 00:21:59 | 0.013169771 | 0,128457799 | 00:22:08 | 0.013108935 | 0,128540126 |
| 00:21:59 | 0.013168534 | 0,128459365 | 00:22:08 | 0.013107824 | 0,128541727 |
| 00:21:59 | 0.013167442 | 0,12846115  | 00:22:09 | 0.013106485 | 0,128543409 |
| 00:22:00 | 0.013166078 | 0,128462957 | 00:22:09 | 0.013105339 | 0,128545188 |
| 00:22:00 | 0.013164673 | 0,128464708 | 00:22:09 | 0.013104037 | 0,128546942 |
| 00:22:00 | 0.01316335  | 0,128466415 | 00:22:09 | 0.013102583 | 0,128548872 |
| 00:22:00 | 0.0131619   | 0,128468372 | 00:22:09 | 0.013100972 | 0,128550663 |
| 00:22:00 | 0.013160587 | 0,128470067 | 00:22:10 | 0.01310008  | 0,128552347 |

|          |             |             |          |             |             |
|----------|-------------|-------------|----------|-------------|-------------|
| 00:22:10 | 0.01309906  | 0,128554255 | 00:22:19 | 0.013039993 | 0,128635322 |
| 00:22:10 | 0.013097672 | 0,128556038 | 00:22:19 | 0.013038772 | 0,128637226 |
| 00:22:10 | 0.013096564 | 0,128557836 | 00:22:19 | 0.013037422 | 0,128638813 |
| 00:22:10 | 0.013095278 | 0,128559497 | 00:22:19 | 0.013036279 | 0,128640318 |
| 00:22:10 | 0.013094273 | 0,128561477 | 00:22:20 | 0.013034814 | 0,128642061 |
| 00:22:11 | 0.013092916 | 0,128563324 | 00:22:20 | 0.013033461 | 0,128643761 |
| 00:22:11 | 0.013091776 | 0,128565004 | 00:22:20 | 0.013032436 | 0,128645414 |
| 00:22:11 | 0.013090448 | 0,128567056 | 00:22:20 | 0.013031322 | 0,128647213 |
| 00:22:11 | 0.01308907  | 0,128568622 | 00:22:20 | 0.013030322 | 0,1286488   |
| 00:22:11 | 0.013087583 | 0,128570544 | 00:22:21 | 0.013028883 | 0,128650634 |
| 00:22:12 | 0.01308633  | 0,128572348 | 00:22:21 | 0.013027775 | 0,128652577 |
| 00:22:12 | 0.013084917 | 0,128574176 | 00:22:21 | 0.013026589 | 0,128654287 |
| 00:22:12 | 0.013083834 | 0,128575933 | 00:22:21 | 0.0130251   | 0,128655881 |
| 00:22:12 | 0.013082551 | 0,12857776  | 00:22:21 | 0.01302407  | 0,128657346 |
| 00:22:12 | 0.013081163 | 0,128579399 | 00:22:22 | 0.013022586 | 0,128659032 |
| 00:22:13 | 0.013079802 | 0,128580876 | 00:22:22 | 0.013021404 | 0,128660752 |
| 00:22:13 | 0.013078496 | 0,128582782 | 00:22:22 | 0.01302023  | 0,128662438 |
| 00:22:13 | 0.013077068 | 0,128584539 | 00:22:22 | 0.013018871 | 0,128664049 |
| 00:22:13 | 0.013075994 | 0,128586226 | 00:22:22 | 0.013017708 | 0,128665832 |
| 00:22:13 | 0.013074611 | 0,128587996 | 00:22:23 | 0.013016277 | 0,128667597 |
| 00:22:14 | 0.013073409 | 0,128589461 | 00:22:23 | 0.013015023 | 0,128669282 |
| 00:22:14 | 0.013071924 | 0,128591196 | 00:22:23 | 0.013013732 | 0,12867121  |
| 00:22:14 | 0.013070675 | 0,128593055 | 00:22:23 | 0.013012326 | 0,128673104 |
| 00:22:14 | 0.013069487 | 0,128594752 | 00:22:23 | 0.013011037 | 0,128675045 |
| 00:22:14 | 0.013068328 | 0,128596532 | 00:22:24 | 0.013009668 | 0,128676756 |
| 00:22:15 | 0.013067034 | 0,128598202 | 00:22:24 | 0.013008434 | 0,128678512 |
| 00:22:15 | 0.01306585  | 0,128599938 | 00:22:24 | 0.013007161 | 0,128680263 |
| 00:22:15 | 0.013064487 | 0,12860145  | 00:22:24 | 0.013006101 | 0,128682079 |
| 00:22:15 | 0.013063226 | 0,128603147 | 00:22:24 | 0.013005091 | 0,128683812 |
| 00:22:15 | 0.013062183 | 0,128604888 | 00:22:25 | 0.013003624 | 0,128685438 |
| 00:22:16 | 0.013061087 | 0,128606851 | 00:22:25 | 0.013002122 | 0,12868723  |
| 00:22:16 | 0.013059858 | 0,12860843  | 00:22:25 | 0.013000757 | 0,128688866 |
| 00:22:16 | 0.013058281 | 0,128610324 | 00:22:25 | 0.012999488 | 0,128690705 |
| 00:22:16 | 0.013057281 | 0,128612195 | 00:22:25 | 0.012998285 | 0,128692387 |
| 00:22:16 | 0.013056103 | 0,128614044 | 00:22:25 | 0.012997168 | 0,128694183 |
| 00:22:17 | 0.013054545 | 0,128615754 | 00:22:26 | 0.012995694 | 0,128696044 |
| 00:22:17 | 0.013053092 | 0,128617387 | 00:22:26 | 0.012994337 | 0,128697658 |
| 00:22:17 | 0.013051927 | 0,12861914  | 00:22:26 | 0.012993117 | 0,128699222 |
| 00:22:17 | 0.013050617 | 0,128621001 | 00:22:26 | 0.012991642 | 0,128700853 |
| 00:22:17 | 0.013049262 | 0,128622776 | 00:22:26 | 0.012990697 | 0,128702551 |
| 00:22:18 | 0.013047714 | 0,128624338 | 00:22:27 | 0.012989624 | 0,128704263 |
| 00:22:18 | 0.013046532 | 0,128626214 | 00:22:27 | 0.012988539 | 0,12870575  |
| 00:22:18 | 0.013045395 | 0,128627863 | 00:22:27 | 0.012987313 | 0,128707644 |
| 00:22:18 | 0.013044434 | 0,128629818 | 00:22:27 | 0.012986054 | 0,128709228 |
| 00:22:18 | 0.013042946 | 0,12863157  | 00:22:28 | 0.012984517 | 0,128710809 |
| 00:22:19 | 0.013041376 | 0,128633411 | 00:22:28 | 0.012983156 | 0,128712432 |

|          |             |             |          |             |             |
|----------|-------------|-------------|----------|-------------|-------------|
| 00:22:28 | 0.012981817 | 0,128714199 | 00:22:37 | 0.012925766 | 0,128794192 |
| 00:22:28 | 0.012980452 | 0,128715806 | 00:22:37 | 0.01292453  | 0,128795837 |
| 00:22:28 | 0.012979231 | 0,128717246 | 00:22:37 | 0.012923224 | 0,128797939 |
| 00:22:28 | 0.012978059 | 0,128718915 | 00:22:38 | 0.01292202  | 0,128799134 |
| 00:22:29 | 0.012976797 | 0,128720534 | 00:22:38 | 0.012920789 | 0,128800789 |
| 00:22:29 | 0.012975642 | 0,128722349 | 00:22:38 | 0.012919598 | 0,128802589 |
| 00:22:29 | 0.012974345 | 0,12872405  | 00:22:38 | 0.012918364 | 0,128804295 |
| 00:22:29 | 0.012973349 | 0,12872572  | 00:22:38 | 0.012917252 | 0,1288061   |
| 00:22:30 | 0.012972144 | 0,12872755  | 00:22:39 | 0.012915939 | 0,128808042 |
| 00:22:30 | 0.012971003 | 0,128729119 | 00:22:39 | 0.012914657 | 0,128809541 |
| 00:22:30 | 0.012969906 | 0,128731131 | 00:22:39 | 0.012913261 | 0,128811335 |
| 00:22:30 | 0.012968693 | 0,128732907 | 00:22:39 | 0.012912091 | 0,128813033 |
| 00:22:30 | 0.012967308 | 0,128734531 | 00:22:39 | 0.012910811 | 0,128814941 |
| 00:22:30 | 0.012966257 | 0,128736556 | 00:22:40 | 0.012909844 | 0,128816768 |
| 00:22:31 | 0.012965213 | 0,128738428 | 00:22:40 | 0.012908671 | 0,128818332 |
| 00:22:31 | 0.012963817 | 0,128740472 | 00:22:40 | 0.012907421 | 0,128819937 |
| 00:22:31 | 0.01296288  | 0,128742198 | 00:22:40 | 0.012906297 | 0,128821535 |
| 00:22:31 | 0.01296152  | 0,128743759 | 00:22:40 | 0.012905075 | 0,128823141 |
| 00:22:31 | 0.012960217 | 0,128745397 | 00:22:41 | 0.012903951 | 0,128824493 |
| 00:22:32 | 0.01295928  | 0,128747032 | 00:22:41 | 0.012902683 | 0,128826241 |
| 00:22:32 | 0.012958051 | 0,128748842 | 00:22:41 | 0.012901275 | 0,128827835 |
| 00:22:32 | 0.012956811 | 0,128750895 | 00:22:41 | 0.012900034 | 0,128829619 |
| 00:22:32 | 0.012955436 | 0,128752495 | 00:22:41 | 0.012898681 | 0,128831516 |
| 00:22:32 | 0.012954178 | 0,128754333 | 00:22:42 | 0.012897643 | 0,128833209 |
| 00:22:33 | 0.012952716 | 0,128756346 | 00:22:42 | 0.012896582 | 0,128834944 |
| 00:22:33 | 0.012951409 | 0,128758019 | 00:22:42 | 0.012895405 | 0,128836832 |
| 00:22:33 | 0.012950374 | 0,12875966  | 00:22:42 | 0.012894261 | 0,128838511 |
| 00:22:33 | 0.012949195 | 0,128761244 | 00:22:42 | 0.012893103 | 0,128840093 |
| 00:22:33 | 0.012948055 | 0,128763301 | 00:22:43 | 0.012891744 | 0,128841641 |
| 00:22:34 | 0.012946705 | 0,128765053 | 00:22:43 | 0.012890525 | 0,128843475 |
| 00:22:34 | 0.012945501 | 0,128766765 | 00:22:43 | 0.012889197 | 0,128845188 |
| 00:22:34 | 0.012944033 | 0,128768632 | 00:22:43 | 0.012888043 | 0,128846924 |
| 00:22:34 | 0.012942743 | 0,12877032  | 00:22:43 | 0.01288669  | 0,12884872  |
| 00:22:34 | 0.012941384 | 0,128771968 | 00:22:44 | 0.01288558  | 0,128850238 |
| 00:22:35 | 0.012940348 | 0,128773462 | 00:22:44 | 0.01288444  | 0,128851927 |
| 00:22:35 | 0.012939313 | 0,128775126 | 00:22:44 | 0.012883325 | 0,128853502 |
| 00:22:35 | 0.012938091 | 0,128776792 | 00:22:44 | 0.012882144 | 0,128855273 |
| 00:22:35 | 0.012936795 | 0,128778516 | 00:22:44 | 0.012880953 | 0,128856664 |
| 00:22:35 | 0.012935483 | 0,128780199 | 00:22:44 | 0.012879919 | 0,128858298 |
| 00:22:36 | 0.012934181 | 0,128782051 | 00:22:45 | 0.012878807 | 0,128859906 |
| 00:22:36 | 0.012932916 | 0,128783663 | 00:22:45 | 0.012877761 | 0,12886187  |
| 00:22:36 | 0.012931622 | 0,128785337 | 00:22:45 | 0.012876405 | 0,128863515 |
| 00:22:36 | 0.012930341 | 0,128787239 | 00:22:45 | 0.012875002 | 0,128865315 |
| 00:22:36 | 0.01292937  | 0,128789079 | 00:22:45 | 0.012873913 | 0,128867112 |
| 00:22:37 | 0.012928016 | 0,128790893 | 00:22:46 | 0.012872703 | 0,12886872  |
| 00:22:37 | 0.012926937 | 0,12879271  | 00:22:46 | 0.012871258 | 0,128870516 |

|          |             |             |          |             |             |
|----------|-------------|-------------|----------|-------------|-------------|
| 00:22:46 | 0.012870192 | 0,128872163 | 00:22:55 | 0.012814629 | 0,128951256 |
| 00:22:46 | 0.012868937 | 0,128873709 | 00:22:55 | 0.01281355  | 0,128952835 |
| 00:22:46 | 0.012867919 | 0,128875607 | 00:22:56 | 0.012812396 | 0,128954634 |
| 00:22:47 | 0.01286677  | 0,12887725  | 00:22:56 | 0.012811011 | 0,12895629  |
| 00:22:47 | 0.012865562 | 0,128878948 | 00:22:56 | 0.012809687 | 0,12895789  |
| 00:22:47 | 0.012864174 | 0,128880706 | 00:22:56 | 0.012808674 | 0,128959697 |
| 00:22:47 | 0.012862894 | 0,128882447 | 00:22:56 | 0.012807361 | 0,128961322 |
| 00:22:47 | 0.012861384 | 0,128884026 | 00:22:57 | 0.012806016 | 0,128962982 |
| 00:22:48 | 0.012860191 | 0,128885764 | 00:22:57 | 0.012804748 | 0,12896477  |
| 00:22:48 | 0.012858951 | 0,128887396 | 00:22:57 | 0.0128036   | 0,128966547 |
| 00:22:48 | 0.012857853 | 0,128889188 | 00:22:57 | 0.012802319 | 0,128968143 |
| 00:22:48 | 0.012856818 | 0,128891008 | 00:22:57 | 0.01280101  | 0,128969688 |
| 00:22:48 | 0.01285562  | 0,128892666 | 00:22:58 | 0.012799818 | 0,128971458 |
| 00:22:49 | 0.012854536 | 0,128894338 | 00:22:58 | 0.012798725 | 0,128973111 |
| 00:22:49 | 0.012853271 | 0,128896143 | 00:22:58 | 0.012797365 | 0,128974666 |
| 00:22:49 | 0.01285212  | 0,128898054 | 00:22:58 | 0.012796276 | 0,128976299 |
| 00:22:49 | 0.012850951 | 0,128899745 | 00:22:58 | 0.012795063 | 0,128978154 |
| 00:22:49 | 0.012849879 | 0,128901479 | 00:22:59 | 0.012793805 | 0,128979817 |
| 00:22:50 | 0.012848643 | 0,12890336  | 00:22:59 | 0.012792562 | 0,128981333 |
| 00:22:50 | 0.012847365 | 0,128905122 | 00:22:59 | 0.012791366 | 0,128983111 |
| 00:22:50 | 0.012846028 | 0,128906778 | 00:22:59 | 0.012790234 | 0,128984781 |
| 00:22:50 | 0.012844821 | 0,128908635 | 00:22:59 | 0.012789032 | 0,128986528 |
| 00:22:50 | 0.012843707 | 0,128910391 | 00:22:59 | 0.01278818  | 0,128988026 |
| 00:22:51 | 0.012842382 | 0,128911871 | 00:23:00 | 0.012786833 | 0,128989796 |
| 00:22:51 | 0.012841317 | 0,128913646 | 00:23:00 | 0.012785685 | 0,128991496 |
| 00:22:51 | 0.012840154 | 0,128915291 | 00:23:00 | 0.012784398 | 0,128993362 |
| 00:22:51 | 0.012838951 | 0,128917224 | 00:23:00 | 0.012783197 | 0,128995055 |
| 00:22:51 | 0.01283756  | 0,128918819 | 00:23:00 | 0.012781885 | 0,128996722 |
| 00:22:52 | 0.012836427 | 0,128920634 | 00:23:01 | 0.012780726 | 0,128998454 |
| 00:22:52 | 0.012835368 | 0,128922288 | 00:23:01 | 0.012779351 | 0,129000071 |
| 00:22:52 | 0.012834059 | 0,128924003 | 00:23:01 | 0.012778229 | 0,129001702 |
| 00:22:52 | 0.012832642 | 0,128925601 | 00:23:01 | 0.012777202 | 0,129003433 |
| 00:22:52 | 0.012831626 | 0,128927475 | 00:23:02 | 0.012776009 | 0,129005121 |
| 00:22:53 | 0.012830408 | 0,128929205 | 00:23:02 | 0.012774894 | 0,129006837 |
| 00:22:53 | 0.012829103 | 0,128930829 | 00:23:02 | 0.012773395 | 0,129008567 |
| 00:22:53 | 0.012828113 | 0,128932239 | 00:23:02 | 0.012772686 | 0,129010258 |
| 00:22:53 | 0.01282685  | 0,128933891 | 00:23:02 | 0.012771245 | 0,129012065 |
| 00:22:53 | 0.012825503 | 0,128935571 | 00:23:02 | 0.01276996  | 0,129013809 |
| 00:22:54 | 0.012824209 | 0,128937307 | 00:23:03 | 0.012768652 | 0,129015616 |
| 00:22:54 | 0.012823066 | 0,128938886 | 00:23:03 | 0.012767473 | 0,129017343 |
| 00:22:54 | 0.012822    | 0,128940727 | 00:23:03 | 0.012766479 | 0,129019004 |
| 00:22:54 | 0.012820794 | 0,128942531 | 00:23:03 | 0.012765455 | 0,129020442 |
| 00:22:54 | 0.012819475 | 0,128944387 | 00:23:03 | 0.012763935 | 0,12902217  |
| 00:22:55 | 0.012818175 | 0,128946253 | 00:23:04 | 0.012762574 | 0,129024132 |
| 00:22:55 | 0.012817094 | 0,128947863 | 00:23:04 | 0.012761323 | 0,129025906 |
| 00:22:55 | 0.012815845 | 0,128949463 | 00:23:04 | 0.012760114 | 0,129027756 |

|          |             |             |          |             |             |
|----------|-------------|-------------|----------|-------------|-------------|
| 00:23:04 | 0.0127589   | 0,129029401 | 00:23:13 | 0.012703765 | 0,129106996 |
| 00:23:04 | 0.01275769  | 0,129030989 | 00:23:14 | 0.012702566 | 0,129108543 |
| 00:23:05 | 0.012756391 | 0,129032836 | 00:23:14 | 0.012701317 | 0,129110177 |
| 00:23:05 | 0.012755318 | 0,129034546 | 00:23:14 | 0.012700017 | 0,129111802 |
| 00:23:05 | 0.012754006 | 0,12903631  | 00:23:14 | 0.012699009 | 0,129113506 |
| 00:23:05 | 0.012752991 | 0,129038044 | 00:23:14 | 0.012697983 | 0,129115172 |
| 00:23:05 | 0.012751662 | 0,129039634 | 00:23:15 | 0.012696809 | 0,129116943 |
| 00:23:06 | 0.012750303 | 0,129041307 | 00:23:15 | 0.012695633 | 0,129118698 |
| 00:23:06 | 0.012748865 | 0,129042996 | 00:23:15 | 0.012694367 | 0,129120095 |
| 00:23:06 | 0.012747692 | 0,129044648 | 00:23:15 | 0.012692866 | 0,129121876 |
| 00:23:06 | 0.012746725 | 0,129046227 | 00:23:15 | 0.01269169  | 0,129123278 |
| 00:23:06 | 0.012745691 | 0,129047922 | 00:23:15 | 0.01269069  | 0,129124829 |
| 00:23:07 | 0.012744496 | 0,129049687 | 00:23:16 | 0.012689625 | 0,129126365 |
| 00:23:07 | 0.012743221 | 0,129051384 | 00:23:16 | 0.012688688 | 0,129128036 |
| 00:23:07 | 0.012742249 | 0,129053057 | 00:23:16 | 0.012687435 | 0,129129784 |
| 00:23:07 | 0.01274102  | 0,129054913 | 00:23:16 | 0.012686257 | 0,129131325 |
| 00:23:07 | 0.01273998  | 0,129056581 | 00:23:17 | 0.012684851 | 0,129133047 |
| 00:23:08 | 0.01273873  | 0,1290585   | 00:23:17 | 0.012683434 | 0,129134706 |
| 00:23:08 | 0.012737764 | 0,129060048 | 00:23:17 | 0.012682472 | 0,129136485 |
| 00:23:08 | 0.012736816 | 0,129061691 | 00:23:17 | 0.01268131  | 0,129137961 |
| 00:23:08 | 0.012735679 | 0,129063246 | 00:23:17 | 0.012680155 | 0,129139767 |
| 00:23:08 | 0.012734266 | 0,129065008 | 00:23:17 | 0.012679139 | 0,129141597 |
| 00:23:09 | 0.012733354 | 0,129066767 | 00:23:18 | 0.012677987 | 0,129142947 |
| 00:23:09 | 0.012732315 | 0,129068286 | 00:23:18 | 0.012677004 | 0,129144609 |
| 00:23:09 | 0.012730732 | 0,129070044 | 00:23:18 | 0.01267579  | 0,129146176 |
| 00:23:09 | 0.012729365 | 0,129071679 | 00:23:18 | 0.012674614 | 0,12914797  |
| 00:23:09 | 0.01272811  | 0,129073533 | 00:23:19 | 0.012673476 | 0,129149424 |
| 00:23:10 | 0.012726686 | 0,129075219 | 00:23:19 | 0.012672307 | 0,129151038 |
| 00:23:10 | 0.012725548 | 0,129076919 | 00:23:19 | 0.012671106 | 0,129152753 |
| 00:23:10 | 0.012724349 | 0,12907871  | 00:23:19 | 0.012670105 | 0,12915439  |
| 00:23:10 | 0.012723148 | 0,129080334 | 00:23:19 | 0.012669076 | 0,12915615  |
| 00:23:10 | 0.012722071 | 0,129081889 | 00:23:19 | 0.012668004 | 0,129157976 |
| 00:23:11 | 0.012720626 | 0,129083522 | 00:23:20 | 0.012667004 | 0,12915978  |
| 00:23:11 | 0.01271927  | 0,129085118 | 00:23:20 | 0.012665872 | 0,129161314 |
| 00:23:11 | 0.012718353 | 0,12908683  | 00:23:20 | 0.012664557 | 0,129162949 |
| 00:23:11 | 0.01271694  | 0,129088644 | 00:23:20 | 0.012663505 | 0,129164721 |
| 00:23:11 | 0.012715955 | 0,129090352 | 00:23:20 | 0.012662269 | 0,129166133 |
| 00:23:12 | 0.012714592 | 0,12909188  | 00:23:21 | 0.012661094 | 0,129167624 |
| 00:23:12 | 0.012713325 | 0,129093558 | 00:23:21 | 0.012659792 | 0,129169056 |
| 00:23:12 | 0.01271224  | 0,129095192 | 00:23:21 | 0.012658481 | 0,12917082  |
| 00:23:12 | 0.012710823 | 0,129097077 | 00:23:21 | 0.012657421 | 0,129172606 |
| 00:23:12 | 0.01270957  | 0,129098714 | 00:23:21 | 0.012656094 | 0,129174232 |
| 00:23:13 | 0.012708663 | 0,129100473 | 00:23:22 | 0.012654836 | 0,129175955 |
| 00:23:13 | 0.012707712 | 0,129101926 | 00:23:22 | 0.012653727 | 0,129177457 |
| 00:23:13 | 0.01270615  | 0,129103599 | 00:23:22 | 0.012652278 | 0,129179285 |
| 00:23:13 | 0.012704858 | 0,129105169 | 00:23:22 | 0.012651247 | 0,12918099  |

|          |             |             |          |             |             |
|----------|-------------|-------------|----------|-------------|-------------|
| 00:23:22 | 0.012650123 | 0,129182524 | 00:23:32 | 0.012594958 | 0,129259559 |
| 00:23:23 | 0.012648926 | 0,129184352 | 00:23:32 | 0.012593871 | 0,129261012 |
| 00:23:23 | 0.012647968 | 0,129185935 | 00:23:32 | 0.012592744 | 0,129262658 |
| 00:23:23 | 0.012646759 | 0,129187787 | 00:23:32 | 0.012591555 | 0,129264202 |
| 00:23:23 | 0.01264566  | 0,129189445 | 00:23:32 | 0.012590347 | 0,129265916 |
| 00:23:23 | 0.01264441  | 0,129191323 | 00:23:33 | 0.012589154 | 0,129267716 |
| 00:23:24 | 0.012643011 | 0,129193077 | 00:23:33 | 0.012587785 | 0,129269458 |
| 00:23:24 | 0.012641744 | 0,129194958 | 00:23:33 | 0.012586671 | 0,129271007 |
| 00:23:24 | 0.012640687 | 0,129196846 | 00:23:33 | 0.012585412 | 0,129272748 |
| 00:23:24 | 0.012639475 | 0,129198683 | 00:23:33 | 0.012584376 | 0,129274477 |
| 00:23:24 | 0.012638192 | 0,129200627 | 00:23:34 | 0.012583395 | 0,129275958 |
| 00:23:25 | 0.01263693  | 0,129202195 | 00:23:34 | 0.01258246  | 0,129277522 |
| 00:23:25 | 0.012635777 | 0,129203887 | 00:23:34 | 0.012581233 | 0,129278992 |
| 00:23:25 | 0.012634631 | 0,129205411 | 00:23:34 | 0.012580123 | 0,129280781 |
| 00:23:25 | 0.012633549 | 0,129207126 | 00:23:34 | 0.012579188 | 0,129282197 |
| 00:23:25 | 0.012632373 | 0,129208863 | 00:23:34 | 0.012578302 | 0,12928391  |
| 00:23:26 | 0.012630878 | 0,129210389 | 00:23:35 | 0.012577312 | 0,129285551 |
| 00:23:26 | 0.012629688 | 0,129212267 | 00:23:35 | 0.012576207 | 0,129287159 |
| 00:23:26 | 0.01262845  | 0,129213824 | 00:23:35 | 0.01257505  | 0,12928885  |
| 00:23:26 | 0.012627351 | 0,129215452 | 00:23:35 | 0.012573925 | 0,129290559 |
| 00:23:26 | 0.012626054 | 0,129216896 | 00:23:35 | 0.01257267  | 0,129292122 |
| 00:23:27 | 0.012624914 | 0,129218513 | 00:23:36 | 0.012571565 | 0,129293763 |
| 00:23:27 | 0.012623596 | 0,129220153 | 00:23:36 | 0.012570421 | 0,129295622 |
| 00:23:27 | 0.012622296 | 0,12922187  | 00:23:36 | 0.012569245 | 0,129296916 |
| 00:23:27 | 0.012621074 | 0,129223628 | 00:23:36 | 0.012568317 | 0,129298477 |
| 00:23:27 | 0.012619762 | 0,129225148 | 00:23:36 | 0.012567008 | 0,129300196 |
| 00:23:28 | 0.012618615 | 0,129226684 | 00:23:37 | 0.012565499 | 0,129301904 |
| 00:23:28 | 0.012617407 | 0,129228101 | 00:23:37 | 0.012564481 | 0,129303443 |
| 00:23:28 | 0.012616301 | 0,129229733 | 00:23:37 | 0.012563341 | 0,129305262 |
| 00:23:28 | 0.012614955 | 0,129231289 | 00:23:37 | 0.012562095 | 0,129306853 |
| 00:23:28 | 0.012613761 | 0,129232895 | 00:23:37 | 0.012561056 | 0,129308456 |
| 00:23:29 | 0.01261245  | 0,129234421 | 00:23:38 | 0.012559886 | 0,129309944 |
| 00:23:29 | 0.012611376 | 0,129236184 | 00:23:38 | 0.012558649 | 0,129311384 |
| 00:23:29 | 0.012610036 | 0,129238038 | 00:23:38 | 0.012557711 | 0,12931295  |
| 00:23:29 | 0.012608857 | 0,129239619 | 00:23:38 | 0.012556293 | 0,129314477 |
| 00:23:29 | 0.012607792 | 0,129241296 | 00:23:38 | 0.012555087 | 0,129316217 |
| 00:23:30 | 0.012606762 | 0,129242807 | 00:23:39 | 0.012554036 | 0,129317997 |
| 00:23:30 | 0.012605674 | 0,129244513 | 00:23:39 | 0.012553068 | 0,129319642 |
| 00:23:30 | 0.012604362 | 0,129246045 | 00:23:39 | 0.012552102 | 0,129321223 |
| 00:23:30 | 0.012603454 | 0,129247773 | 00:23:39 | 0.012550961 | 0,129322692 |
| 00:23:30 | 0.012602242 | 0,129249589 | 00:23:39 | 0.012549675 | 0,129324408 |
| 00:23:31 | 0.012600909 | 0,129251322 | 00:23:40 | 0.012548378 | 0,129326146 |
| 00:23:31 | 0.012599766 | 0,129253077 | 00:23:40 | 0.012547144 | 0,129327785 |
| 00:23:31 | 0.012598631 | 0,129254755 | 00:23:40 | 0.012546179 | 0,129329392 |
| 00:23:31 | 0.012597477 | 0,12925637  | 00:23:40 | 0.012545136 | 0,129331188 |
| 00:23:31 | 0.012596359 | 0,129257825 | 00:23:40 | 0.012543986 | 0,129332965 |

|          |             |             |          |             |             |
|----------|-------------|-------------|----------|-------------|-------------|
| 00:23:41 | 0.012542922 | 0,12933455  | 00:23:50 | 0.01248951  | 0,129410462 |
| 00:23:41 | 0.012541707 | 0,129336167 | 00:23:50 | 0.012488136 | 0,129412063 |
| 00:23:41 | 0.012540625 | 0,12933768  | 00:23:50 | 0.012486973 | 0,129413778 |
| 00:23:41 | 0.012539379 | 0,12933932  | 00:23:50 | 0.012485952 | 0,129415085 |
| 00:23:41 | 0.012538104 | 0,12934086  | 00:23:51 | 0.012484634 | 0,129416755 |
| 00:23:42 | 0.012536874 | 0,129342483 | 00:23:51 | 0.012483579 | 0,129418279 |
| 00:23:42 | 0.012535597 | 0,129344086 | 00:23:51 | 0.012482463 | 0,129419779 |
| 00:23:42 | 0.012534166 | 0,129345745 | 00:23:51 | 0.012481392 | 0,129421292 |
| 00:23:42 | 0.012533145 | 0,129347549 | 00:23:51 | 0.012480302 | 0,129422652 |
| 00:23:42 | 0.01253193  | 0,129349208 | 00:23:52 | 0.012479379 | 0,129424278 |
| 00:23:43 | 0.012530524 | 0,129350769 | 00:23:52 | 0.012478217 | 0,129425829 |
| 00:23:43 | 0.012529266 | 0,129352212 | 00:23:52 | 0.012477277 | 0,129427361 |
| 00:23:43 | 0.012528129 | 0,129354062 | 00:23:52 | 0.012476126 | 0,129428961 |
| 00:23:43 | 0.012526885 | 0,129355905 | 00:23:52 | 0.012475128 | 0,12943066  |
| 00:23:43 | 0.012525572 | 0,129357567 | 00:23:52 | 0.012474079 | 0,129432267 |
| 00:23:44 | 0.012524553 | 0,129359152 | 00:23:53 | 0.012472861 | 0,12943409  |
| 00:23:44 | 0.012523623 | 0,129360975 | 00:23:53 | 0.012471883 | 0,129435822 |
| 00:23:44 | 0.012522482 | 0,129362926 | 00:23:53 | 0.01247087  | 0,129437477 |
| 00:23:44 | 0.012521529 | 0,129364573 | 00:23:53 | 0.012469839 | 0,129439163 |
| 00:23:44 | 0.012520518 | 0,129366191 | 00:23:53 | 0.012468923 | 0,12944068  |
| 00:23:45 | 0.01251943  | 0,129367593 | 00:23:54 | 0.01246781  | 0,129442291 |
| 00:23:45 | 0.012518463 | 0,129369164 | 00:23:54 | 0.01246699  | 0,129443859 |
| 00:23:45 | 0.012517176 | 0,129370769 | 00:23:54 | 0.012465796 | 0,129445452 |
| 00:23:45 | 0.012516131 | 0,129372399 | 00:23:54 | 0.012464718 | 0,129447267 |
| 00:23:45 | 0.012515173 | 0,129374041 | 00:23:54 | 0.012463524 | 0,12944894  |
| 00:23:46 | 0.01251409  | 0,129375538 | 00:23:55 | 0.01246243  | 0,12945052  |
| 00:23:46 | 0.012512895 | 0,129376884 | 00:23:55 | 0.012461116 | 0,129452146 |
| 00:23:46 | 0.012511727 | 0,129378561 | 00:23:55 | 0.012459926 | 0,129453662 |
| 00:23:46 | 0.012510695 | 0,129380474 | 00:23:55 | 0.012458994 | 0,12945536  |
| 00:23:46 | 0.012509295 | 0,129382183 | 00:23:55 | 0.012457817 | 0,129456824 |
| 00:23:47 | 0.012508327 | 0,129384095 | 00:23:56 | 0.012456625 | 0,129458545 |
| 00:23:47 | 0.012507133 | 0,129385787 | 00:23:56 | 0.01245552  | 0,129460033 |
| 00:23:47 | 0.012506054 | 0,129387643 | 00:23:56 | 0.012454458 | 0,129461426 |
| 00:23:47 | 0.012504857 | 0,129389181 | 00:23:56 | 0.012453363 | 0,129463117 |
| 00:23:47 | 0.012503583 | 0,129390579 | 00:23:56 | 0.012452179 | 0,129464542 |
| 00:23:48 | 0.012502519 | 0,129392257 | 00:23:57 | 0.012451123 | 0,129466272 |
| 00:23:48 | 0.012501416 | 0,129393976 | 00:23:57 | 0.012450046 | 0,129467981 |
| 00:23:48 | 0.01250024  | 0,129395636 | 00:23:57 | 0.012448816 | 0,129469621 |
| 00:23:48 | 0.012498843 | 0,129397243 | 00:23:57 | 0.012448    | 0,129471405 |
| 00:23:48 | 0.012497784 | 0,129398999 | 00:23:57 | 0.012446787 | 0,129473082 |
| 00:23:49 | 0.012496401 | 0,129400484 | 00:23:58 | 0.01244584  | 0,129474615 |
| 00:23:49 | 0.012495481 | 0,129402311 | 00:23:58 | 0.012444811 | 0,129476228 |
| 00:23:49 | 0.012494275 | 0,129403792 | 00:23:58 | 0.012443827 | 0,129477941 |
| 00:23:49 | 0.012493218 | 0,129405381 | 00:23:58 | 0.012442714 | 0,129479569 |
| 00:23:49 | 0.01249191  | 0,129407091 | 00:23:58 | 0.012441657 | 0,129480883 |
| 00:23:50 | 0.012490812 | 0,129408861 | 00:23:59 | 0.012440458 | 0,129482414 |

|          |             |             |          |             |             |
|----------|-------------|-------------|----------|-------------|-------------|
| 00:23:59 | 0.012439203 | 0,129484087 | 00:24:08 | 0.012388236 | 0,129558356 |
| 00:23:59 | 0.012438135 | 0,12948553  | 00:24:08 | 0.012387014 | 0,12956017  |
| 00:23:59 | 0.012437091 | 0,129486985 | 00:24:08 | 0.012385989 | 0,129561759 |
| 00:23:59 | 0.012435964 | 0,129488691 | 00:24:08 | 0.012384941 | 0,129563319 |
| 00:24:00 | 0.012435046 | 0,129490271 | 00:24:09 | 0.012383904 | 0,12956503  |
| 00:24:00 | 0.012434038 | 0,12949182  | 00:24:09 | 0.012382843 | 0,129566425 |
| 00:24:00 | 0.012432958 | 0,129493288 | 00:24:09 | 0.012381783 | 0,129568132 |
| 00:24:00 | 0.012431979 | 0,12949487  | 00:24:09 | 0.012380795 | 0,129569862 |
| 00:24:00 | 0.012430634 | 0,129496409 | 00:24:10 | 0.012379752 | 0,129571479 |
| 00:24:01 | 0.012429365 | 0,129498076 | 00:24:10 | 0.012378785 | 0,12957299  |
| 00:24:01 | 0.012428337 | 0,12949973  | 00:24:10 | 0.012378785 | 0,12957299  |
| 00:24:01 | 0.012427229 | 0,129501461 |          |             |             |
| 00:24:01 | 0.012426016 | 0,129503377 |          |             |             |
| 00:24:01 | 0.012424882 | 0,129505173 |          |             |             |
| 00:24:02 | 0.012423752 | 0,129507056 |          |             |             |
| 00:24:02 | 0.01242247  | 0,129508471 |          |             |             |
| 00:24:02 | 0.012421179 | 0,129509986 |          |             |             |
| 00:24:02 | 0.01242033  | 0,129511638 |          |             |             |
| 00:24:02 | 0.012419081 | 0,129513099 |          |             |             |
| 00:24:03 | 0.012417919 | 0,12951475  |          |             |             |
| 00:24:03 | 0.012416668 | 0,129516233 |          |             |             |
| 00:24:03 | 0.012415715 | 0,129517965 |          |             |             |
| 00:24:03 | 0.012414564 | 0,129519585 |          |             |             |
| 00:24:03 | 0.012413577 | 0,129521121 |          |             |             |
| 00:24:04 | 0.012412667 | 0,129522777 |          |             |             |
| 00:24:04 | 0.012411611 | 0,129524333 |          |             |             |
| 00:24:04 | 0.012410556 | 0,129525822 |          |             |             |
| 00:24:04 | 0.012409466 | 0,129527424 |          |             |             |
| 00:24:04 | 0.012408382 | 0,129528974 |          |             |             |
| 00:24:05 | 0.012407543 | 0,129530604 |          |             |             |
| 00:24:05 | 0.012406301 | 0,129532291 |          |             |             |
| 00:24:05 | 0.012405104 | 0,129533948 |          |             |             |
| 00:24:05 | 0.012404079 | 0,129535503 |          |             |             |
| 00:24:05 | 0.012402883 | 0,129536982 |          |             |             |
| 00:24:06 | 0.012401778 | 0,129538777 |          |             |             |
| 00:24:06 | 0.012400632 | 0,129540655 |          |             |             |
| 00:24:06 | 0.012399414 | 0,129542405 |          |             |             |
| 00:24:06 | 0.012398316 | 0,129543999 |          |             |             |
| 00:24:06 | 0.012397345 | 0,129545524 |          |             |             |
| 00:24:07 | 0.012396083 | 0,129547246 |          |             |             |
| 00:24:07 | 0.01239501  | 0,12954889  |          |             |             |
| 00:24:07 | 0.012393735 | 0,129550308 |          |             |             |
| 00:24:07 | 0.01239249  | 0,129551869 |          |             |             |
| 00:24:07 | 0.012391292 | 0,129553374 |          |             |             |
| 00:24:07 | 0.012390284 | 0,129555042 |          |             |             |
| 00:24:08 | 0.012389426 | 0,129556582 |          |             |             |
