# Supplementary material for: Copper-catalyzed enantioselective 1,4-addition of alkyl groups to N-sulfonyl imines
Source: Royal Society of Chemistry journal article supplement (doi:10.1039/c4cc07134d), 2014-09-25
Supplement: c4cc07134d2.pdf [file c4cc07134d2.pdf]

## Supporting Information

### Copper-Catalyzed Enantioselective 1,4-Addition of Alkyl Groups to *N*-Sulfonyl Imines

Johannes Westmeier and Paultheo von Zezschwitz\*

Fachbereich Chemie, Philipps-Universität Marburg, 35032 Marburg, Germany  
zezschwitz@chemie.uni-marburg.de, Fax: +49-6421-2825362

| Table of Content                                             | Page |
|--------------------------------------------------------------|------|
| 1) Experimental Section                                      | 2    |
| 2) Monitoring of the 1,4-Addition by Continuous IR Detection | 23   |
| 3) $^1\text{H}$ and $^{13}\text{C}$ NMR Spectra              | 24   |
| 4) References                                                | 41   |

## 1) Experimental Section

**General:**  $^1\text{H}$  and  $^{13}\text{C}$  NMR spectra were recorded at 300 or 500 MHz (75.5 or 125 MHz) on a Bruker AV-300, an AV-500, or a DRX-500 instrument in  $\text{CDCl}_3$ , using the residual peak of  $\text{CHCl}_3$  ( $^1\text{H}$  NMR:  $\delta = 7.26$  ppm,  $^{13}\text{C}$  NMR:  $\delta = 77.36$  ppm) as internal standard. IR spectra were recorded on a Bruker Alpha-P FT-IR spectrometer. Optical rotations were measured on a Perkin-Elmer 241 polarimeter,  $[\alpha]_{\text{D}}^{20}$  values are given in  $10^{-1} \text{ deg cm}^2 \text{ g}^{-1}$ . Electron impact (EI) mass spectra were recorded on a Finnigan MAT 95S spectrometer (70 eV); electrospray ionisation (ESI) mass spectra on a Finnigan LTQ FT spectrometer. Melting points are uncorrected. Gas chromatograms were recorded on a Shimadzu GC-2010 Plus with an AOC-20i autosampler. Enantiomeric excesses were determined with a Chiral-Separations Cyclodextrin TA column (6-TBDMS-2,3-acetyl- $\beta$ -cyclodextrin, 50% in PS086, 25 m, 0.25 mm i.d., 0.125  $\mu\text{m}$  film). Helium was used as the carrier gas. Method A: 4 min 80  $^{\circ}\text{C}$  isothermal  $\rightarrow$  10 K  $\text{min}^{-1}$  to 130  $^{\circ}\text{C}$   $\rightarrow$  20 K  $\text{min}^{-1}$  to 170  $^{\circ}\text{C}$   $\rightarrow$  5 min isothermal; 45  $\text{cm s}^{-1}$  gas flow. Method B: 2 min 100  $^{\circ}\text{C}$  isothermal  $\rightarrow$  2 K  $\text{min}^{-1}$  to 140  $^{\circ}\text{C}$   $\rightarrow$  20 min isothermal  $\rightarrow$  1 K  $\text{min}^{-1}$  to 160  $^{\circ}\text{C}$   $\rightarrow$  50 min isothermal; 45  $\text{cm s}^{-1}$  gas flow. Method C: 2 min 100  $^{\circ}\text{C}$  isothermal  $\rightarrow$  2 K  $\text{min}^{-1}$  to 140  $^{\circ}\text{C}$   $\rightarrow$  20 min isothermal  $\rightarrow$  0.5 K  $\text{min}^{-1}$  to 160  $^{\circ}\text{C}$   $\rightarrow$  50 min isothermal; 30  $\text{cm s}^{-1}$  gas flow. HPLC chromatograms were recorded on a JASCO instrument equipped with a JASCO MD-2010 Plus multiwavelength detector. Method A: Daicel Chiralpak IA column, isocratic elution: *n*-hexane/2-propanol 98:2, flow rate 1.0  $\text{mL min}^{-1}$ . Method B: Daicel Chiralpak IC column, isocratic elution: *n*-hexane/2-propanol 95:5, flow rate 1.0  $\text{mL min}^{-1}$ . Method C: Daicel Chiralpak IA column coupled with a Daicel Chiralpak IB column, isocratic elution: *n*-hexane/2-propanol 98:2, flow rate 1.0  $\text{mL min}^{-1}$ . Method D: Daicel Chiralpak IC column, isocratic elution: *n*-hexane/2-propanol 99:1, flow rate 1.5  $\text{mL min}^{-1}$ . Method E: Daicel Chiralpak IC column, isocratic elution: *n*-hexane/2-propanol 98:2, flow rate 1.0  $\text{mL min}^{-1}$ . Method F: Daicel Chiralpak IC column, isocratic elution: *n*-hexane/2-propanol 98:2, flow rate 1.5  $\text{mL min}^{-1}$ . Method G: Daicel Chiralpak IC column, isocratic elution: *n*-hexane/2-propanol 85:15, flow rate 1.0  $\text{mL min}^{-1}$ . Diastereomeric ratios were determined by  $^1\text{H}$  NMR spectrometry at 300 or 500 MHz; the relative configuration of the products was determined by NOESY. Solvents used for extraction and chromatography were of technical grade and distilled prior to use. All moisture-sensitive reactions were carried out under argon in oven- and/or flame-dried glassware. Column chromatography was carried out on MN Kieselgel 60 M (Machery-Nagel, 0.040-0.063 mm). Diethyl ether, THF, and toluene were distilled from sodium benzophenone ketyl; triethyl amine and  $\text{CH}_2\text{Cl}_2$  were distilled from  $\text{CaH}_2$ . *N*-(Cyclohex-2-en-1-ylidene)-4-methylbenzenesulfonamide (**1a**),<sup>1</sup> *N*-(4,4-dimethylcyclopent-2-en-1-ylidene)-4-methylbenzenesulfonamide (**1b**),<sup>1</sup> *N*-(4,4-dimethylcyclohex-2-en-1-ylidene)-4-methylbenzenesulfonamide (**1c**),<sup>1</sup> (*E*)-*N*-(5,5-dimethylcyclopent-2-en-1-ylidene)-4-

methylbenzenesulfonamide (**1d**),<sup>1</sup> (*E*)-*N*-(6,6-dimethylcyclohex-2-en-1-ylidene)-4-methylbenzenesulfonamide (**1e**),<sup>1</sup> *N*-(5,5-dimethylcyclohex-2-en-1-ylidene)-4-methylbenzenesulfonamide (**1f**),<sup>1</sup> *N*-(3-methylcyclohex-2-en-1-ylidene)-4-methylbenzenesulfonamide (**1g**),<sup>1</sup> *N*-(1,3-diphenylprop-2*E*-en-1-ylidene)-4-methylbenzenesulfonamide (**1h**),<sup>2</sup> *N*-(5*R*-methylcyclohex-2-en-1-ylidene)-4-methylbenzenesulfonamide (**1i**),<sup>1</sup> *N*-(cyclohex-2-en-1-ylidene)-*tert*-butanesulfonamide (**5a**),<sup>1</sup> *N*-(cyclopent-2-en-1-ylidene)-*tert*-butanesulfonamide (**5b**),<sup>1</sup> *N*-(cyclohept-2-en-1-ylidene)-*tert*-butanesulfonamide (**5c**),<sup>1</sup> and *N*-(cyclohex-2-en-1-ylidene)diphenylphosphinamide (**7a**),<sup>1</sup> the racemic ligand *O,O'*-(1,1'-dinaphthyl-2,2'-diyl)-*N,N*-di-*iso*-propylphosphoramidite,<sup>3</sup> *O,O'*-(*S*)-(1,1'-dinaphthyl-2,2'-diyl)-*N,N*-di-(*R,R*)-1-phenylethylphosphoramidite (**L1**) and *O,O'*-(*R*)-(1,1'-dinaphthyl-2,2'-diyl)-*N,N*-di-(*S,S*)-1-phenylethylphosphoramidite (*ent*-**L1**),<sup>4</sup> RuCl(*p*-cymene)[(*S,S*)-Ts-DPEN] (**3**),<sup>5</sup> and copper(I)-thiophen-2-carboxylate (CuTC)<sup>6</sup> were prepared according to literature. All other chemicals were of commercial origin and used as received.

### General Procedure for the Optimization of the Conjugate Addition (GP 1):

A mixture of the respective copper salt (10.0  $\mu$ mol, 2.00 mol%), ligand **L1** (10.8 mg, 20.0  $\mu$ mol, 4.00 mol%), and ketimine **1a** (125 mg, 501  $\mu$ mol) was dissolved in the respective solvent (4 mL), stirred for 0.5 h at rt, and then cooled to the given temperature. ZnEt<sub>2</sub> (0.50 mL, 0.75 mmol, 1.5 M in toluene) was added slowly, and the resulting yellow solution was stirred for the given time at the given temperature. The solution was then poured into a mixture of methyl *tert*-butyl ether (MTBE, 20 mL), H<sub>2</sub>O (0.5 mL), and NaHCO<sub>3</sub> (0.5 g), stirred for 10 min, dried over MgSO<sub>4</sub>, filtered, and concentrated under reduced pressure.

For determination of the yield by <sup>1</sup>H NMR spectrometry, a precise amount of diphenylmethane (about 50 mg) was added to the crude enamide **2a-Et**, which was then dissolved in CH<sub>2</sub>Cl<sub>2</sub> (20 mL). The solvent was then carefully removed under reduced pressure to give the crude product with internal standard, and a <sup>1</sup>H NMR spectrum was recorded in CDCl<sub>3</sub>. Signals at  $\delta$  = 5.37 (1H, **2a-Et**) and  $\delta$  = 3.99 (2H, diphenylmethane) were used for determination of the yield.

### General Procedure for the Hydrolysis of Enamide **2a-Et** (GP 2):

THF (5 mL) and aqueous HCl (1 mL, 6 M) were added to the crude enamide **2a-Et**, and the solution was stirred for 1 h at rt. The reaction mixture was then diluted with pentane (5 mL), and sat. aqueous NaHCO<sub>3</sub> solution was added until the gas evolution ceased. The organic phase was separated, dried over MgSO<sub>4</sub>, filtered, and concentrated under reduced pressure. Purification was performed by column chromatography over silica gel (*R*<sub>f</sub> 0.31, pentane/Et<sub>2</sub>O 5:1), and the ee of the 3-ethylcyclohexanone thus obtained was measured by GC, method A, retention times 9.54 min (minor enantiomer), 9.67 min (major enantiomer). The (*S*)-configuration of enamide **2a-Et** was

determined by comparison with a sample of authentic (*S*)-3-ethylcyclohexanone, which was prepared according to literature.<sup>7</sup>

### General Procedure for the Asymmetric Conjugate Addition (GP 3):

A mixture of copper(I)-thiophene-2-carboxylate (1.91 mg, 10.0  $\mu$ mol), ligand **L1** (10.8 mg, 20.0  $\mu$ mol), and the respective ketimine **1**, **5**, or **7** (500  $\mu$ mol) was dissolved in toluene (4 mL), stirred for 0.5 h at rt, and then cooled to the given temperature. ZnEt<sub>2</sub> (0.50 mL, 0.75 mmol, 1.5 M in toluene) was slowly added, and the resulting yellow solution was stirred for the given time at the given temperature. The reaction mixture was then poured into a mixture of MTBE (20 mL), H<sub>2</sub>O (0.5 mL), and NaHCO<sub>3</sub> (0.5 g), stirred for 10 min, dried over MgSO<sub>4</sub>, filtered, and concentrated under reduced pressure.

### General Procedure for the Hydrogenation Catalyzed by RuCl(*p*-cymene)[Ts-DPEN] (GP 4)

The crude product of the conjugate addition was dissolved in acetonitrile (3 mL), racemic RuCl(*p*-cymene)[Ts-DPEN] (**3**, 15.9 mg, 25.0  $\mu$ mol) and a 5:2 mixture of formic acid and triethyl amine (314  $\mu$ L, 0.75 mmol) were added, and the reaction mixture was stirred for 16 h at rt. The solution was then poured into half-saturated brine (10 mL) and extracted with EtOAc (3  $\times$  10 mL). The combined organic phases were washed with brine, dried over MgSO<sub>4</sub>, filtered, concentrated under reduced pressure, and purified by flash column chromatography over silica gel.

### *N*-[(1*S*,3*S*)-3-Ethylcyclohexyl]-4-methylbenzenesulfonamide (*trans*-**4a-Et**)

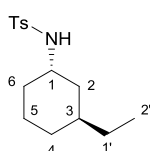

Preparation according to GP 3 and GP 4 using ketimine **1a** (125 mg, 501  $\mu$ mol), reaction time 1 h at  $-30^{\circ}\text{C}$ , yielded 120 mg (85%) of amide *trans*-**4a-Et** as a colorless solid with a dr (*trans/cis*) >97:3.

$R_f$  0.50, CH<sub>2</sub>Cl<sub>2</sub>. – mp  $68^{\circ}\text{C}$ . –  $[\alpha]_D^{20} +7.5$  ( $c$  1.0 in CHCl<sub>3</sub>). – IR (neat)  $\nu_{\text{max}}/\text{cm}^{-1}$  3277, 2927, 2872, 2850, 1598, 1421, 1322, 1163, 1142, 818, 708, 552, 515. –  $\delta_{\text{H}}$  (500 MHz; CDCl<sub>3</sub>) 0.74 (t,  $^3J = 7.5$  Hz, 3H, 2'-H), 0.86-0.93 (m, 1H, 4-H), 1.07-1.17 (m, 3H, 2-H, 1'-H), 1.32 (m<sub>c</sub>, 1H, 3-H), 1.37-1.62 (m, 6H, 2-H, 4-H, 5-H, 6-H), 2.41 (s, 3H, ArCH<sub>3</sub>), 3.50 (m<sub>c</sub>, 1H, 1-H), 4.89 (d,  $^3J = 7.3$  Hz, 1H, NH), 7.29 (m<sub>c</sub>, 2H, Ar-H), 7.77 (m<sub>c</sub>, 2H, Ar-H). –  $\delta_{\text{C}}$  (125 MHz; CDCl<sub>3</sub>) 11.4 (C-2'), 20.4 (C-5), 21.6 (ArCH<sub>3</sub>), 28.7 (C-1'), 31.3 (C-4), 31.8 (C-6), 33.7 (C-3), 37.4 (C-2), 49.5 (C-1), 127.1 (C-Ar), 129.7 (C-Ar), 138.4 (C-Ar), 143.2 (C-Ar). – HRMS (ESI)  $m/z$  calcd. for C<sub>15</sub>H<sub>23</sub>NO<sub>2</sub>SNa [M+Na]<sup>+</sup>: 304.1342; found 304.1341. – The enantiomeric excess was measured by HPLC, method A, retention times 33.6 min (major enantiomer), 38.1 min (minor enantiomer): 98% ee. The (*S*)-configuration at C-3 was assigned based on the configuration of enamide **2a-Et**.

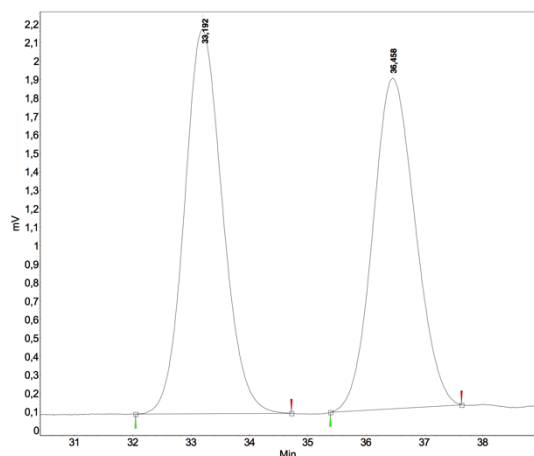

Peak results :

| Index | Name    | Time [Min] | Quantity [% Area] | Height [mV] | Area [mV.Min] | Area % [%] |
|-------|---------|------------|-------------------|-------------|---------------|------------|
| 1     | UNKNOWN | 33.192     | 51.11             | 2.1         | 1.6           | 51.114     |
| 2     | UNKNOWN | 36.458     | 48.89             | 1.8         | 1.5           | 48.886     |
| Total |         |            | 100.00            | 3.9         | 3.1           | 100.000    |

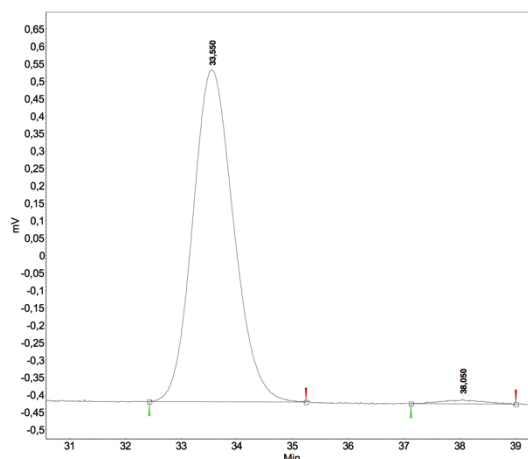

Peak results :

| Index | Name    | Time [Min] | Quantity [% Area] | Height [mV] | Area [mV.Min] | Area % [%] |
|-------|---------|------------|-------------------|-------------|---------------|------------|
| 1     | UNKNOWN | 33.550     | 98.78             | 1.0         | 0.8           | 98.779     |
| 2     | UNKNOWN | 38.050     | 1.22              | 0.0         | 0.0           | 1.221      |
| Total |         |            | 100.00            | 1.0         | 0.8           | 100.000    |

Racemic amide *trans*-**4a-Et** was prepared as follows: CuCl (49.5 mg, 500  $\mu$ mol) was suspended in THF (2 mL), cooled to  $-30\text{ }^{\circ}\text{C}$ , and treated dropwise with EtMgBr (344  $\mu$ L, 750  $\mu$ mol, 2.18 M in Et<sub>2</sub>O). The reaction mixture was stirred for 15 min, a solution of ketimine **1a** (125 mg, 501  $\mu$ mol) in THF (2 mL) was added dropwise, and the reaction mixture was stirred for 1 h at  $-30\text{ }^{\circ}\text{C}$ . Workup was performed as described in GP 3. Hydrogenation according to GP 4 yielded 42 mg (30%) of the racemic amide *trans*-**4a-Et**.

### Preparation of Amide *trans*-**4a-Et** with 0.01 mol% Cu-catalyst

A mixture of copper(I)-thiophene-2-carboxylate (1.91 mg, 10.0  $\mu$ mol) and ligand **L1** (10.8 mg, 20.0  $\mu$ mol) was dissolved in toluene (50 mL) and stirred for 3 h at rt. In a second flask, ketimine **1a** (125 mg, 501  $\mu$ mol) was dissolved in toluene (3.75 mL), an aliquot of the catalyst-containing solution (250  $\mu$ L) was added, and the reaction mixture was cooled to  $-30\text{ }^{\circ}\text{C}$ . ZnEt<sub>2</sub> (0.50 mL, 0.75 mmol, 1.5 M in toluene) was slowly added, and the resulting yellow solution was stirred for 1 h at  $-30\text{ }^{\circ}\text{C}$ . Workup was performed according to GP 3, and hydrogenation according to GP 4 furnished 125 mg (89%) of amide *trans*-**4a-Et**. – 87% ee.

### *N*-[(1*R*,3*S*)-3-Ethylcyclohexyl]-4-methylbenzenesulfonamide (*cis*-**4a-Et**)

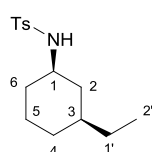

Conjugate addition was performed according to GP 3 using ketimine **1a** (125 mg, 501  $\mu$ mol), reaction time 1 h at  $-30\text{ }^{\circ}\text{C}$ . After workup, the crude product was cooled to  $0\text{ }^{\circ}\text{C}$ , and a solution of *t*BuNH<sub>2</sub>·BH<sub>3</sub> (91.3 mg, 1.05 mmol) in CH<sub>2</sub>Cl<sub>2</sub> (3 mL) was added. The reaction mixture was stirred for 16 h at  $0\text{ }^{\circ}\text{C}$ , then poured into half-saturated aqueous NH<sub>4</sub>Cl (2 mL), and extracted with MTBE (3  $\times$  10 mL). The combined organic phases were washed with water (10 mL) and brine (10 mL), dried over MgSO<sub>4</sub>, filtered, and concentrated under reduced

pressure. Purification by flash column chromatography over silica gel furnished 90 mg (64%) of amide *cis*-**4a-Et** as a colorless solid. – dr (*trans/cis*) before chromatography: 10:90, after chromatography: <3:97.

$R_f$  0.25, pentane/EtOAc 10:1. – mp 54 °C. –  $[\alpha]_D^{20} +22.8$  ( $c$  1.0 in  $\text{CHCl}_3$ ). – IR (neat)  $\nu_{\text{max}}/\text{cm}^{-1}$  3277, 2927, 2854, 1599, 1448, 1321, 1155, 1093, 813, 662, 568, 547. –  $\delta_{\text{H}}$  (500 MHz;  $\text{CDCl}_3$ ) 0.63-0.74 (m, 2H, 2-H, 5-H), 0.78 (t,  $J = 7.2$  Hz, 3H, 2'-H), 1.00 (m<sub>c</sub>, 1H, 6-H), 1.07-1.20 (m, 4H, 3-H, 4-H, 1'-H), 1.59-1.68 (m, 2H, 4-H, 5-H), 1.73-1.83 (m, 2H, 2-H, 6-H), 2.41 (s, 3H,  $\text{ArCH}_3$ ), 3.06 (m<sub>c</sub>, 1H, 1-H), 4.78 (d,  $J = 7.7$  Hz, 1H, NH), 7.28 (m<sub>c</sub>, 2H, Ar-H), 7.77 (m<sub>c</sub>, 2H, Ar-H). –  $\delta_{\text{C}}$  (125 MHz;  $\text{CDCl}_3$ ) 11.3 (C-2'), 21.6 ( $\text{ArCH}_3$ ), 24.9 (C-4), 29.6 (C-1'), 31.5 (C-5), 34.3 (C-6), 38.7 (C-3), 40.6 (C-2), 53.3 (C-1), 127.0 (C-Ar), 129.7 (C-Ar), 138.7 (C-Ar), 143.2 (C-Ar). – HRMS (ESI)  $m/z$  calcd for  $\text{C}_{15}\text{H}_{23}\text{NO}_2\text{SNa}$   $[\text{M}+\text{Na}]^+$ : 304.1342; found 304.1341. – The enantiomeric excess was measured by HPLC, method B, retention times 58.6 min (minor enantiomer), 68.0 min (major enantiomer): 96% ee

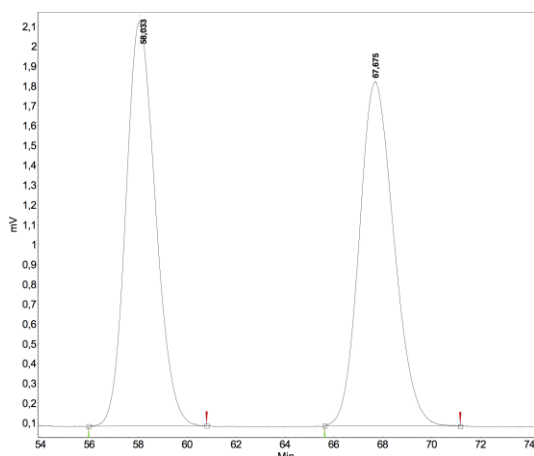

Peak results :

| Index | Name    | Time [Min] | Quantity [% Area] | Height [mV] | Area [mV.Min] | Area % [%] |
|-------|---------|------------|-------------------|-------------|---------------|------------|
| 1     | UNKNOWN | 58.033     | 50.01             | 2.0         | 2.9           | 50.014     |
| 2     | UNKNOWN | 67.675     | 49.99             | 1.7         | 2.9           | 49.986     |
| Total |         |            | 100.00            | 3.8         | 5.7           | 100.000    |

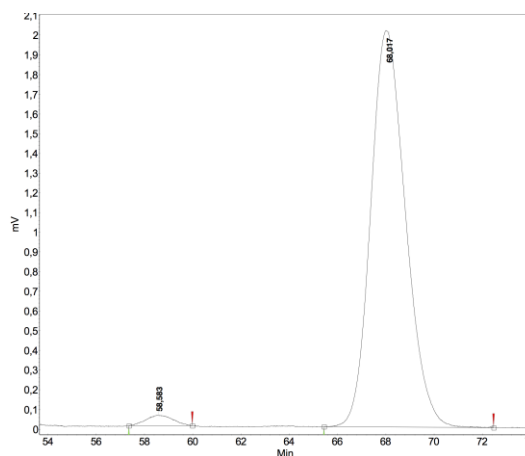

Peak results :

| Index | Name    | Time [Min] | Quantity [% Area] | Height [mV] | Area [mV.Min] | Area % [%] |
|-------|---------|------------|-------------------|-------------|---------------|------------|
| 2     | UNKNOWN | 58.583     | 1.96              | 0.1         | 0.1           | 1.958      |
| 1     | UNKNOWN | 68.017     | 98.04             | 2.0         | 3.4           | 98.042     |
| Total |         |            | 100.00            | 2.1         | 3.4           | 100.000    |

Racemic preparation was performed as described above using racemic *O,O'*-(1,1'-dinaphthyl-2,2'-diyl)-*N,N*-di-*iso*-propylphosphoramidite (8.30 mg, 20.0  $\mu\text{mol}$ ) and yielded 51 mg (36%) of racemic amide *cis*-**4a-Et**.

#### *N*-[(1*S*,3*S*)-3-Methylcyclohexyl]-4-methylbenzenesulfonamide (**4a-Me**)

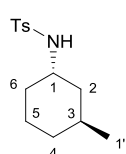

**Addition of  $\text{ZnMe}_2$ :** Preparation according to GP 3 and GP 4 using ketimine **1a** (125 mg, 501  $\mu\text{mol}$ ) and  $\text{ZnMe}_2$  (0.63 mL, 0.76 mmol, 1.2 M in toluene), reaction time 1 h at  $-30$  °C, yielded 117 mg (87%) of amide **4a-Me** as a colorless solid with a dr (*trans/cis*) >97:3.

$R_f$  0.44,  $\text{CH}_2\text{Cl}_2$ . – mp 112 °C. –  $[\alpha]_D^{20}$  –0.7 ( $c$  1.0 in  $\text{CHCl}_3$ ). – IR (neat)  $\nu_{\text{max}}/\text{cm}^{-1}$  3282, 2925, 2867, 1599, 1454, 1422, 1323, 1159, 1141, 1092, 813, 672, 549. –  $\delta_{\text{H}}$  (500 MHz;  $\text{CDCl}_3$ ) 0.78 (d,  $J$  = 6.5 Hz, 3H, 1'-H), 0.84-0.92 (m, 1H, 4-H), 1.09 (ddd,  $J$  = 13.5, 10.3, 3.4 Hz, 1H, 2-H), 1.33-1.62 (m, 7H, 2-H, 3-H, 4-H, 5-H, 6-H), 2.41 (s, 3H,  $\text{ArCH}_3$ ), 3.49 (m<sub>c</sub>, 1H, 1-H), 5.01 (d,  $J$  = 7.3 Hz, 1H, NH), 7.28 (m<sub>c</sub>, 2H, Ar-H), 7.77 (m<sub>c</sub>, 2H, Ar-H). –  $\delta_{\text{C}}$  (125 MHz;  $\text{CDCl}_3$ ) 20.4 (C-5), 21.6 (Ar- $\text{CH}_3$ ), 21.7 (C-1'), 26.9 (C-3), 31.4 (C-6), 33.7 (C-4), 39.7 (C-2), 49.5 (C-1), 127.1 (C-Ar), 129.7 (C-Ar), 138.3 (C-Ar), 143.2 (C-Ar). – HRMS (ESI)  $m/z$  calcd for  $\text{C}_{14}\text{H}_{21}\text{NO}_2\text{SNa}$   $[\text{M}+\text{Na}]^+$ : 290.1185; found 290.1183. – The enantiomeric excess was measured by HPLC, method A, retention times 39.7 min (major enantiomer), 44.8 min (minor enantiomer): 98% ee. The absolute configuration was assigned in analogy to amide **4a-Et**.

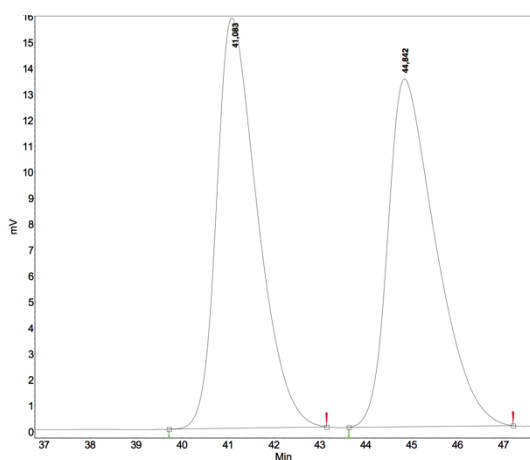

Peak results :

| Index | Name    | Time [Min] | Quantity [% Area] | Height [mV] | Area [mV.Min] | Area % [%] |
|-------|---------|------------|-------------------|-------------|---------------|------------|
| 1     | UNKNOWN | 41.083     | 50.18             | 15.8        | 16.3          | 50.179     |
| 2     | UNKNOWN | 44.842     | 49.82             | 13.4        | 16.2          | 49.821     |
| Total |         |            | 100.00            | 29.2        | 32.4          | 100.000    |

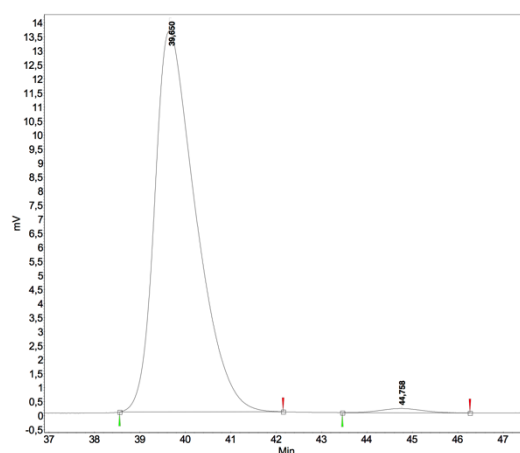

Peak results :

| Index | Name    | Time [Min] | Quantity [% Area] | Height [mV] | Area [mV.Min] | Area % [%] |
|-------|---------|------------|-------------------|-------------|---------------|------------|
| 1     | UNKNOWN | 39.650     | 98.86             | 13.6        | 14.2          | 98.859     |
| 2     | UNKNOWN | 44.758     | 1.14              | 0.2         | 0.2           | 1.141      |
| Total |         |            | 100.00            | 13.7        | 14.4          | 100.000    |

Racemic conjugate addition was performed in analogy to a literature procedure:<sup>8</sup> Ketimine **1a** (125 mg, 501  $\mu\text{mol}$ ) and  $[\text{Rh}(\text{cod})\text{Cl}]_2$  (6.16 mg, 12.5  $\mu\text{mol}$ ) were dissolved in THF (2 mL), and the resulting yellow solution was cooled to 0 °C. Neat  $\text{AlMe}_3$  (72  $\mu\text{L}$ , 0.75 mmol) was added dropwise, and the reaction mixture was stirred for 1 h at rt. The reaction mixture was then poured into a mixture of MTBE (20 mL),  $\text{H}_2\text{O}$  (1 mL), and  $\text{NaHCO}_3$  (0.5 g), stirred for 10 min, dried over  $\text{MgSO}_4$ , filtered, and concentrated under reduced pressure. Hydrogenation according to GP 4 yielded 70 mg (52%) of the racemic amide **4a-Me**.

Addition of  $\text{AlMe}_3$ : Conjugate addition according to GP 3 using ketimine **1a** (125 mg, 501  $\mu\text{mol}$ ) and  $\text{AlMe}_3$  (72  $\mu\text{L}$ , 0.75 mmol) in  $\text{Et}_2\text{O}$  (4 mL), reaction time 1.5 h at –30 °C, and hydrogenation according to GP 4 yielded 37 mg (28%) of amide **4a-Me** with a dr (*trans/cis*) >97:3. – 96% ee.

***N*-[*(1S,4R)*-3,3-Dimethyl-4-ethylcyclopentyl]-4-methylbenzenesulfonamide (**4b-Et**)**

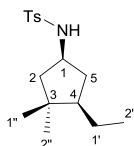

Conjugate addition according to GP 3 using ketimine **1b** (65.8 mg, 250  $\mu$ mol), CuTC (0.96 mg, 5.0  $\mu$ mol), ligand **L1** (5.40 mg, 10.0  $\mu$ mol), and  $\text{ZnEt}_2$  (0.25 mL, 0.38 mmol, 1.5 M in toluene) in toluene (2 mL), reaction time 5 h at  $-30^\circ\text{C}$ . The crude product was dissolved in EtOH (2 mL) and cooled to  $-15^\circ\text{C}$ , and  $\text{NaBH}_4$  (94.5 mg, 2.50 mmol) was added. The solution was stirred for 20 h at this temperature, poured into saturated aqueous  $\text{NH}_4\text{Cl}$  (10 mL), and extracted with  $\text{CH}_2\text{Cl}_2$  ( $3 \times 10$  mL). The combined organic phases were washed with brine, dried over  $\text{MgSO}_4$ , filtered, and concentrated under reduced pressure; the crude product was purified by flash column chromatography over silica gel. Amide **4b-Et** (52 mg, 70%) was obtained as a viscous, colorless oil that crystallized in the freezer. – dr (*trans/cis*) before chromatography: 7:93, after chromatography: 7:93.

$R_f$  0.32,  $\text{CH}_2\text{Cl}_2$ . – mp  $74\text{--}75^\circ\text{C}$ . –  $[\alpha]_D^{20} -11.7$  ( $c$  1.0 in  $\text{CHCl}_3$ ). – IR (neat)  $\nu_{\text{max}}/\text{cm}^{-1}$  3274, 2956, 2865, 1598, 1495, 1319, 1304, 1156, 1092, 813, 661, 565, 546. –  $\delta_{\text{H}}$  (500 MHz;  $\text{CDCl}_3$ ) 0.78 (s, 3H, 2''-H), 0.79 (t,  $^3J = 7.4$  Hz, 3H, 2'-H), 0.87 (s, 3H, 1''-H), 0.96–1.03 (m, 1H, 1'-H), 1.09–1.15 (m, 1H, 5-H), 1.16–1.22 (m, 1H, 4-H), 1.28 (dd,  $J = 13.7, 6.1$  Hz, 1H, 2-H), 1.37 (m<sub>c</sub>, 1H, 1'-H), 1.72 (dd,  $J = 13.7, 9.2$  Hz, 1H, 2-H), 2.12 (m<sub>c</sub>, 1H, 5-H), 2.42 (s, 3H,  $\text{ArCH}_3$ ), 3.54 (m<sub>c</sub>, 1H, 1-H), 4.95 (s, 1H, NH), 7.29 (m<sub>c</sub>, 2H, Ar-H), 7.75 (m<sub>c</sub>, 2H, Ar-H). –  $\delta_{\text{C}}$  (125 MHz;  $\text{CDCl}_3$ ) 13.6 (C-2'), 21.6 ( $\text{ArCH}_3$ ), 22.6 (C-1'), 24.2 (C-2''), 29.2 (C-1''), 39.36 (C-5), 39.40 (C-3), 49.4 (C-2), 50.6 (C-4), 51.9 (C-1), 127.2 (C-Ar), 129.7 (C-Ar), 137.9 (C-Ar), 143.3 (C-Ar). – HRMS (ESI)  $m/z$  calcd for  $\text{C}_{16}\text{H}_{25}\text{NO}_2\text{SNa}$   $[\text{M}+\text{Na}]^+$ : 318.1498; found 318.1500. – The enantiomeric excesses were measured by HPLC, method A; *cis*-**4b-Et**: retention times 38.4 min (minor enantiomer), 41.4 min (major enantiomer): 91% ee; *trans*-**4b-Et**: retention times 34.3 min (minor enantiomer), 36.2 min (major enantiomer): 91% ee. The absolute configuration was assigned in analogy to amide **4a-Et**.



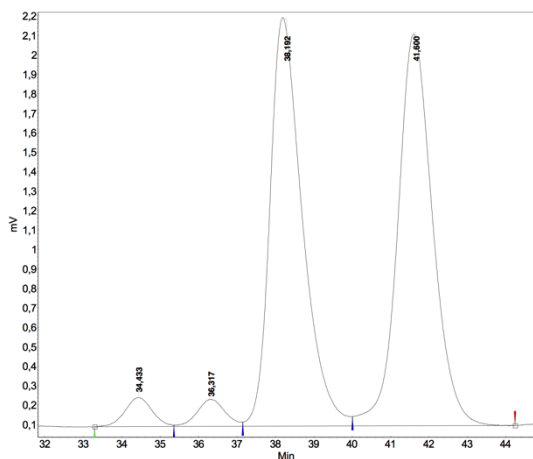

Peak results :

| Index | Name    | Time [Min] | Quantity [% Area] | Height [mV] | Area [mV.Min] | Area % [%] |
|-------|---------|------------|-------------------|-------------|---------------|------------|
| 1     | UNKNOWN | 34.433     | 2.75              | 0.1         | 0.1           | 2.747      |
| 2     | UNKNOWN | 36.317     | 2.64              | 0.1         | 0.1           | 2.636      |
| 3     | UNKNOWN | 38.192     | 46.47             | 2.1         | 2.0           | 46.472     |
| 4     | UNKNOWN | 41.600     | 48.14             | 2.0         | 2.1           | 48.144     |
| Total |         |            | 100.00            | 4.4         | 4.4           | 100.000    |

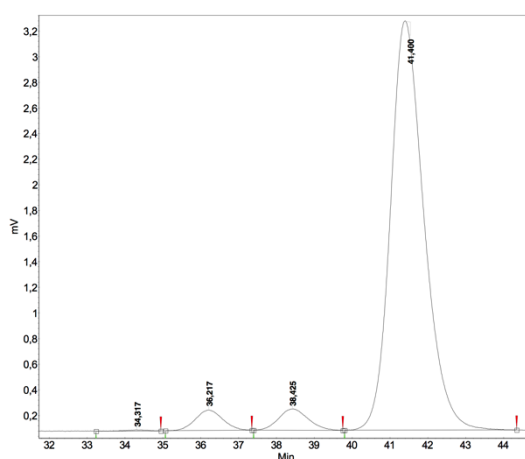

Peak results :

| Index | Name    | Time [Min] | Quantity [% Area] | Height [mV] | Area [mV.Min] | Area % [%] |
|-------|---------|------------|-------------------|-------------|---------------|------------|
| 4     | UNKNOWN | 34.317     | 0.17              | 0.0         | 0.0           | 0.168      |
| 3     | UNKNOWN | 36.217     | 3.70              | 0.2         | 0.1           | 3.698      |
| 1     | UNKNOWN | 38.425     | 4.19              | 0.2         | 0.1           | 4.191      |
| 2     | UNKNOWN | 41.400     | 91.94             | 3.2         | 3.3           | 91.942     |
| Total |         |            | 100.00            | 3.5         | 3.6           | 100.000    |

Racemic conjugate addition was performed as follows: CuCl (49.5 mg, 500  $\mu$ mol) was suspended in THF (2 mL) and cooled to  $-30$   $^{\circ}$ C, and EtMgBr (344  $\mu$ L, 750  $\mu$ mol, 2.18 M in Et<sub>2</sub>O) was added dropwise. The reaction mixture was stirred for 15 min, a solution of ketimine **1b** (132 mg, 501  $\mu$ mol) in THF (2 mL) was added dropwise, and the reaction mixture was stirred for 5 h at  $-30$   $^{\circ}$ C. Workup was performed according to GP 3; hydrogenation according to GP 4 and repeated column chromatography over silica gel yielded an analytical sample of the racemic amide **4b-Et**.

#### *N*-[(1*S*,3*R*)-4,4-Dimethyl-3-ethylcyclohexyl]-4-methylbenzenesulfonamide (**4c-Et**)

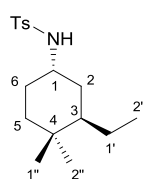

Conjugate addition according to GP 3 using ketimine **1c** (69.3 mg, 250  $\mu$ mol), CuTC (0.96 mg, 5.0  $\mu$ mol), ligand **L1** (5.40 mg, 10.0  $\mu$ mol), and ZnEt<sub>2</sub> (0.25 mL, 0.38 mmol, 1.5 M in toluene) in toluene (2 mL), reaction time 18 h at  $-10$   $^{\circ}$ C.

Hydrogenation according to GP 4 with racemic RuCl(*p*-cymene)[Ts-DPEN] (**3**, 7.95 mg, 12.5  $\mu$ mol) and a 5:2 mixture of formic acid and triethyl amine (157  $\mu$ L, 374  $\mu$ mol) yielded 67 mg (87%) of amide **4c-Et** as a colorless solid with a dr (*trans/cis*) >97:3.

$R_f$  0.37, pentane/EtOAc 10:1. – mp 100  $^{\circ}$ C. –  $[\alpha]_D^{20}$   $-23.1$  ( $c$  1.0 in CHCl<sub>3</sub>). – IR (neat)  $\nu_{max}/cm^{-1}$  3279, 2961, 2939, 2867, 1428, 1325, 1152, 683, 552. –  $\delta_H$  (500 MHz; CDCl<sub>3</sub>) 0.69 (t,  $J$  = 7.4 Hz, 3H, 2'-H), 0.71 (s, 3H, 1''-H\*), 0.75-0.84 (m, 1H, 5-H), 0.88 (s, 3H, 2''-H\*), 1.02 (m<sub>c</sub>, 1H, 3-H), 1.15-1.21 (m, 2H, 1'-H, 2-H), 1.28 (m<sub>c</sub>, 1H, 2-H), 1.39-1.44 (m, 1H, 6-H), 1.48-1.60 (m, 3H, 1'-H, 5-H, 6-H), 2.42 (s, 3H, ArCH<sub>3</sub>), 3.48 (m<sub>c</sub>, 1H, 1-H), 4.66 (d,  $J$  = 6.4 Hz, 1H, NH), 7.29 (m<sub>c</sub>, 2H, Ar-H), 7.77 (m<sub>c</sub>, 2H, H-Ar). –  $\delta_C$  (125 MHz; CDCl<sub>3</sub>) 12.6 (C-2'), 20.6 (C-2''\*), 21.6 (ArCH<sub>3</sub>), 22.1

(C-5), 27.8 (C-6), 29.8 (C-1''), 31.6 (C-1'), 32.9 (C-4), 35.4 (C-2), 43.0 (C-3), 49.4 (C-1), 127.2 (C-Ar), 129.8 (C-Ar), 138.4 (C-Ar), 143.3 (C-Ar). – HRMS (ESI)  $m/z$  calcd for  $C_{17}H_{27}NO_2SNa$   $[M+Na]^+$ : 332.1655; found 332.1654. – The enantiomeric excess was measured by HPLC, method A, retention times 35.1 min (minor enantiomer), 42.2 min (major enantiomer): 96% ee. The absolute configuration was assigned in analogy to amide **4a-Et**.

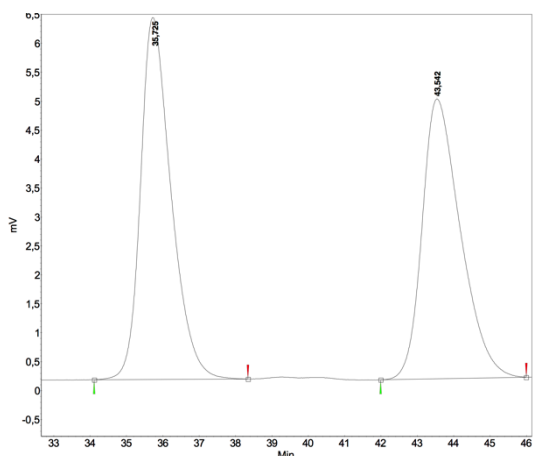

Peak results :

| Index | Name    | Time [Min] | Quantity [% Area] | Height [mV] | Area [mV.Min] | Area % [%] |
|-------|---------|------------|-------------------|-------------|---------------|------------|
| 1     | UNKNOWN | 35.725     | 50.79             | 6.3         | 6.1           | 50.787     |
| 2     | UNKNOWN | 43.542     | 49.21             | 4.8         | 5.9           | 49.213     |
| Total |         |            | 100.00            | 11.1        | 12.0          | 100.000    |

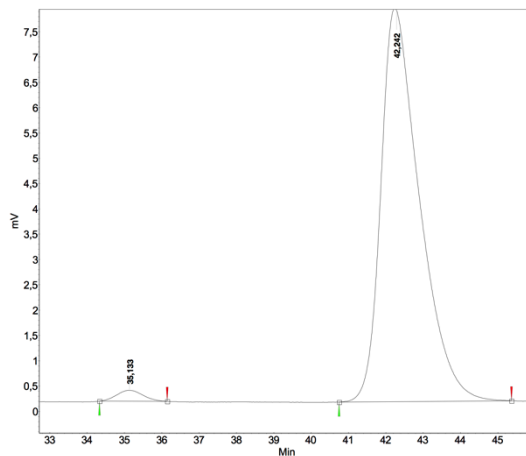

Peak results :

| Index | Name    | Time [Min] | Quantity [% Area] | Height [mV] | Area [mV.Min] | Area % [%] |
|-------|---------|------------|-------------------|-------------|---------------|------------|
| 1     | UNKNOWN | 35.133     | 1.87              | 0.2         | 0.2           | 1.867      |
| 2     | UNKNOWN | 42.242     | 98.13             | 7.8         | 9.3           | 98.133     |
| Total |         |            | 100.00            | 8.0         | 9.5           | 100.000    |

Racemic conjugate addition was performed as follows: CuCl (24.8 mg, 251  $\mu$ mol) was suspended in THF (1 mL) and cooled to  $-10^{\circ}\text{C}$ , and EtMgBr (172  $\mu$ L, 375  $\mu$ mol, 2.18 M in Et<sub>2</sub>O) was added dropwise. The reaction mixture was stirred for 15 min, a solution of ketimine **1c** (69.3 mg, 250  $\mu$ mol) in THF (1 mL) was added dropwise, and the reaction mixture was stirred for 18 h at  $-10^{\circ}\text{C}$ . Workup was performed according to GP 3; hydrogenation according to GP 4 and repeated column chromatography over silica gel yielded an analytical sample of the racemic amide **4c-Et**.

#### *N*-[(1*R*,4*S*)-2,2-Dimethyl-4-ethylcyclopentyl]-4-methylbenzenesulfonamide (**4d-Et**)

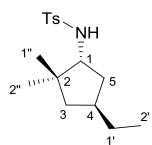

Conjugate addition according to GP 3 using ketimine **1d** (65.8 mg, 250  $\mu$ mol), CuTC (0.96 mg, 5.0  $\mu$ mol), ligand **L1** (5.40 mg, 10.0  $\mu$ mol), and ZnEt<sub>2</sub> (0.25 mL, 0.38 mmol, 1.5 M in toluene) in toluene (2 mL), reaction time 20 h at  $-30^{\circ}\text{C}$ . The crude product was dissolved in EtOH (2 mL) and cooled to  $0^{\circ}\text{C}$ , and NaBH<sub>4</sub> (94.5 mg, 2.50 mmol) was added. The solution was stirred for 16 h at this temperature, poured into saturated aqueous NH<sub>4</sub>Cl (10 mL), and extracted with CH<sub>2</sub>Cl<sub>2</sub> (3  $\times$  10 mL). The combined organic phases were washed with brine, dried over MgSO<sub>4</sub>, filtered, and concentrated under reduced pressure. Purification by flash column chromatography over silica gel yielded 66 mg (89%) of amide **4d-Et** as a

viscous, colorless oil that crystallized in the freezer. – dr (*trans/cis*) before chromatography: 64:36, after chromatography: 64:36.

$R_f$  0.33,  $\text{CH}_2\text{Cl}_2$ . – mp 102 °C. –  $[\alpha]_D^{20} +0.6$  ( $c$  1.0 in  $\text{CHCl}_3$ ). – IR (neat)  $\nu_{\text{max}}/\text{cm}^{-1}$  3256, 2955, 2930, 2872, 1320, 1156, 1084, 809, 669, 570. –  $\delta_{\text{H}}$  (500 MHz;  $\text{CDCl}_3$ ; signals of *cis*-**4d**-Et marked with “#”) 0.74 (t,  $J = 7.4$  Hz, 3H, 2'-H), 0.76 (t,  $J = 7.4$  Hz, 3H, 2'-H#), 0.81 (s, 3H, 2''-H), 0.85 (s, 3H, 1''-H#), 0.87 (s, 3H, 1''-H, 2''-H#), 0.89-0.95 (m, 1H, 3-H), 0.98-1.02 (m, 1H, 5-H#), 1.04-1.08 (m, 1H, 3-H#), 1.14-1.25 (m, 2H, 1'-H), 1.34-1.40 (m, 1H, 5-H), 1.45-1.52 (m, 1H, 5-H), 1.57-1.63 (m, 1H, 3-H, 4-H#), 1.79-1.85 (m, 1H, 5-H#, 4-H), 2.41 (s, 3H,  $\text{ArCH}_3$ ), 3.11-3.18 (m, 1H, 1-H), 4.79 (d,  $J = 9.4$  Hz, 1H, NH), 4.84 (d,  $J = 9.4$  Hz, 1H, NH#), 7.28 ( $m_c$ , 2H, Ar-H), 7.77 ( $m_c$ , 2H, Ar-H). –  $\delta_{\text{C}}$  (125 MHz;  $\text{CDCl}_3$ ; signals of *cis*-**4d**-Et marked with “#”) 12.4 (C-2'), 12.8 (C-2'#), 21.1 (C-2''), 21.6 ( $\text{ArCH}_3$ ), 24.5 (C-1'#), 26.8 (C-1''), 28.3 (C-2''#), 29.9 (C-1'#), 30.2 (C-1'), 35.4 (C-4), 36.1 (C-4#), 37.2 (C-5), 38.9 (C-5#), 40.2 (C-2#), 41.8 (C-2), 45.3 (C-3#), 46.1 (C-3), 62.0 (C-1), 63.0 (C-1#), 127.2 (C-Ar), 129.6 (C-Ar), 138.3 (C-Ar), 143.2 (C-Ar). – HRMS (ESI)  $m/z$  calcd for  $\text{C}_{16}\text{H}_{25}\text{NO}_2\text{SNa}$   $[\text{M}+\text{Na}]^+$ : 318.1498; found 318.1497. – The enantiomeric excesses were measured by HPLC, method C; *trans*-**4d**-Et: retention times 45.3 min (major enantiomer), 55.0 min (minor enantiomer): 80% ee; *cis*-**4d**-Et: retention times 43.2 min (minor enantiomer), 52.0 min (major enantiomer): 78% ee. The absolute configurations were assigned in analogy to amide **4a**-Et.

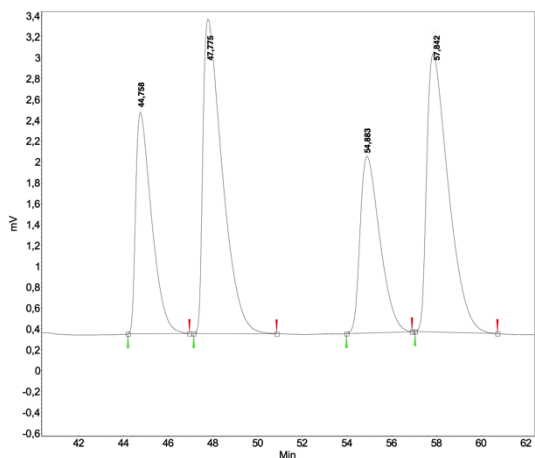

Peak results :

| Index | Name    | Time [Min] | Quantity [% Area] | Height [mV] | Area [mV.Min] | Area % [%] |
|-------|---------|------------|-------------------|-------------|---------------|------------|
| 1     | UNKNOWN | 44.758     | 18.50             | 2.1         | 1.8           | 18.505     |
| 2     | UNKNOWN | 47.775     | 31.81             | 3.0         | 3.0           | 31.815     |
| 3     | UNKNOWN | 54.883     | 18.24             | 1.7         | 1.7           | 18.237     |
| 4     | UNKNOWN | 57.842     | 31.44             | 2.7         | 3.0           | 31.444     |
| Total |         |            | 100.00            | 9.5         | 9.5           | 100.000    |

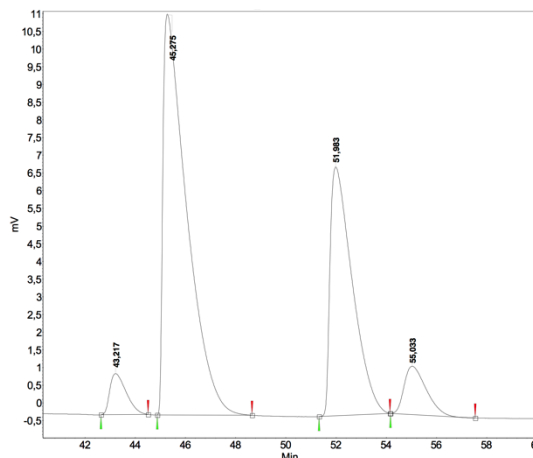

Peak results :

| Index | Name    | Time [Min] | Quantity [% Area] | Height [mV] | Area [mV.Min] | Area % [%] |
|-------|---------|------------|-------------------|-------------|---------------|------------|
| 1     | UNKNOWN | 43.217     | 4.01              | 1.2         | 0.9           | 4.007      |
| 2     | UNKNOWN | 45.275     | 56.66             | 11.3        | 12.4          | 56.659     |
| 3     | UNKNOWN | 51.983     | 33.01             | 7.0         | 7.2           | 33.008     |
| 4     | UNKNOWN | 55.033     | 6.33              | 1.4         | 1.4           | 6.326      |
| Total |         |            | 100.00            | 20.9        | 21.9          | 100.000    |

Racemic conjugate addition was performed as follows: CuCl (24.8 mg, 251  $\mu\text{mol}$ ) was suspended in THF (1 mL) and cooled to  $-30$  °C, and EtMgBr (172  $\mu\text{L}$ , 375  $\mu\text{mol}$ , 2.18 M in  $\text{Et}_2\text{O}$ ) was added dropwise. The reaction mixture was stirred for 15 min, a solution of ketimine **1d** (65.8 mg, 250  $\mu\text{mol}$ ) in THF (1 mL) was added dropwise, and the reaction mixture was stirred for 16 h

at  $-30\text{ }^{\circ}\text{C}$ . Workup and hydrogenation were performed as described in GP 3 and GP 4 to yield 20 mg (27%) of the racemic amide **4d-Et**.

#### ***N*-[(1*S*,5*S*)-2,2-Dimethyl-5-ethylcyclohexyl]-4-methylbenzenesulfonamide (**4e-Et**)**

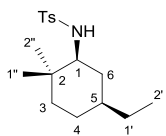

Conjugate addition according to GP 3 using ketimine **1e** (138.7 mg, 500.0  $\mu\text{mol}$ ), reaction time 16 h at  $-30\text{ }^{\circ}\text{C}$ . The crude product was cooled to  $0\text{ }^{\circ}\text{C}$ , and a solution of  $t\text{BuNH}_2\cdot\text{BH}_3$  (91.3 mg, 1.05 mmol) in  $\text{CH}_2\text{Cl}_2$  (3 mL) was added. The reaction mixture was stirred for 16 h at  $0\text{ }^{\circ}\text{C}$ , poured into half-saturated aqueous  $\text{NH}_4\text{Cl}$  (2 mL), and extracted with MTBE ( $3 \times 10\text{ mL}$ ). The combined organic phases were washed with water (10 mL) and brine (10 mL), dried over  $\text{MgSO}_4$ , filtered, and concentrated under reduced pressure. Purification by flash column chromatography over silica gel furnished 118 mg (76%) of amide **4e-Et** as a colorless solid with a dr (*trans/cis*) <3:97.

$R_f$  0.50,  $\text{CH}_2\text{Cl}_2$ . – mp  $136\text{ }^{\circ}\text{C}$ . –  $[\alpha]_D^{20} +17.7$  ( $c$  1.0 in  $\text{CHCl}_3$ ). – IR (neat)  $\nu_{\text{max}}/\text{cm}^{-1}$  3249, 2955, 2920, 2855, 1597, 1451, 1318, 1155, 1092, 812, 660, 573, 549. –  $\delta_{\text{H}}$  (500 MHz;  $\text{CDCl}_3$ ) 0.71 (t,  $J = 7.3\text{ Hz}$ , 3H, 2'-H), 0.76 (s, 3H, 2''-H), 0.79 (s, 3H, 1''-H), 0.84-0.96 (m, 2H, 3-H, 6-H), 1.02-1.21 (m, 4H, 4-H, 5-H, 1'-H), 1.39-1.44 (m, 3H, 3-H, 4-H, 6-H), 2.41 (s, 3H,  $\text{ArCH}_3$ ), 2.90 (ddd,  $J = 12.2, 9.5, 4.0\text{ Hz}$ , 1H, 1-H), 4.39 (d,  $J = 9.5\text{ Hz}$ , 1H, NH), 7.28 (m<sub>c</sub>, 2H, Ar-H), 7.76 (m<sub>c</sub>, 2H, Ar-H). –  $\delta_{\text{C}}$  (125 MHz;  $\text{CDCl}_3$ ) 11.3 (C-2'), 18.7 (C-2''), 21.6 ( $\text{ArCH}_3$ ), 27.8 (C-3), 29.32 (C-1'), 29.34 (C-1''), 34.6 (C-2), 36.2 (C-6), 39.5 (C-5), 40.1 (C-4), 60.9 (C-1), 127.2 (C-Ar), 129.6 (C-Ar), 138.6 (C-Ar), 143.2 (C-Ar). – HRMS (ESI)  $m/z$  calcd for  $\text{C}_{17}\text{H}_{27}\text{NO}_2\text{SNa}$   $[\text{M}+\text{Na}]^+$ : 332.1655; found 332.1652. – The enantiomeric excess was measured by HPLC, method D, retention times 139 min (minor enantiomer), 149 min (major enantiomer): 91% ee. The absolute configuration was assigned in analogy to amide **4a-Et**.

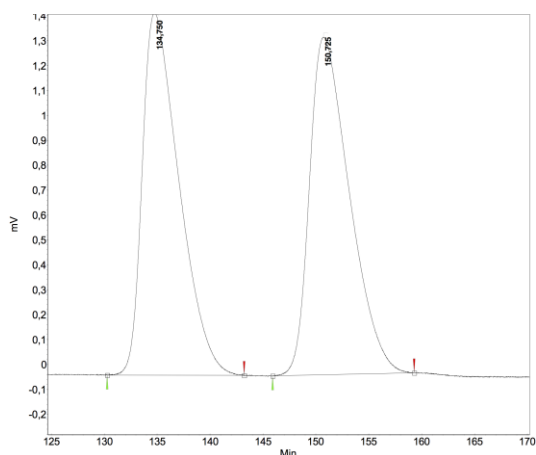

Peak results :

| Index | Name    | Time [Min] | Quantity [% Area] | Height [mV] | Area [mV.Min] | Area % [%] |
|-------|---------|------------|-------------------|-------------|---------------|------------|
| 1     | UNKNOWN | 134.750    | 49.68             | 1.5         | 5.8           | 49.676     |
| 2     | UNKNOWN | 150.725    | 50.32             | 1.4         | 5.9           | 50.324     |
| Total |         |            | 100.00            | 2.8         | 11.8          | 100.000    |

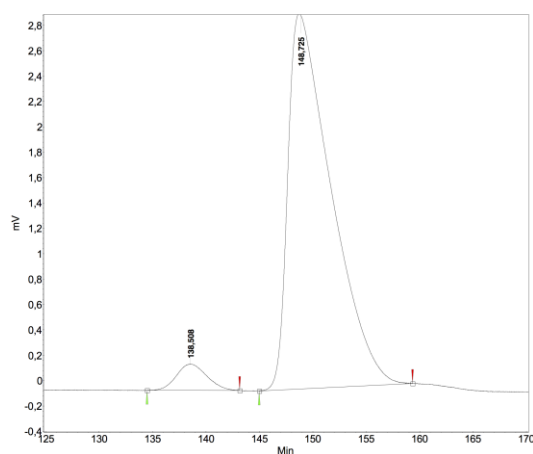

Peak results :

| Index | Name    | Time [Min] | Quantity [% Area] | Height [mV] | Area [mV.Min] | Area % [%] |
|-------|---------|------------|-------------------|-------------|---------------|------------|
| 1     | UNKNOWN | 138.508    | 4.67              | 0.2         | 0.7           | 4.668      |
| 2     | UNKNOWN | 148.725    | 95.33             | 3.0         | 13.9          | 95.332     |
| Total |         |            | 100.00            | 3.2         | 14.5          | 100.000    |

Racemic conjugate addition was performed as follows: CuCl (19.8 mg, 200  $\mu$ mol) was suspended in THF (1 mL) and cooled to  $-30\text{ }^{\circ}\text{C}$ , and EtMgBr (138  $\mu$ L, 301  $\mu$ mol, 2.18 M in Et<sub>2</sub>O) was added dropwise. The reaction mixture was stirred for 15 min, a solution of ketimine **1e** (55.5 mg, 200  $\mu$ mol) in THF (1 mL) was added dropwise, and the reaction mixture was stirred for 1 h at  $-30\text{ }^{\circ}\text{C}$ . Workup and hydrogenation were performed according to the preparation of enantiomerically enriched **4e-Et** using *t*BuNH<sub>2</sub>·BH<sub>3</sub> (36.5 mg, 420  $\mu$ mol). Purification by column chromatography yielded 39 mg (63%) of the racemic amide **4e-Et**.

***N*-[(1*R*,5*S*)-3,3-Dimethyl-5-ethylcyclohexyl]-4-methylbenzenesulfonamide (**4f-Et**)**

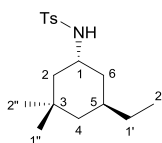

Preparation according to GP 3 and GP 4 using ketimine **1f** (139 mg, 501  $\mu$ mol), reaction time 1 h at  $-30\text{ }^{\circ}\text{C}$ , yielded 129 mg (83%) of amide **4f-Et** as a colorless solid with a dr (*trans/cis*) >97:3.

$R_f$  0.39, pentane/EtOAc 10:1. – mp  $82\text{ }^{\circ}\text{C}$ . –  $[\alpha]_D^{20} -5.8$  ( $c$  1.0 in CHCl<sub>3</sub>). – IR (neat)  $\nu_{\max}/\text{cm}^{-1}$  3255, 2957, 2918, 2873, 1347, 1304, 1152, 1120, 773, 666, 597, 527, 498. –  $\delta_H$  (500 MHz; CDCl<sub>3</sub>) 0.72-0.75 (m, 1H, 4-H), 0.76 (t,  $J = 7.4\text{ Hz}$ , 3H, 2'-H), 0.82 (s, 3H, 2''-H), 0.95 (m<sub>c</sub>, 1H, 6-H), 0.93 (s, 3H, 1''-H), 1.12 (m<sub>c</sub>, 2H, 1'-H), 1.23 (dd,  $J = 14.2, 4.6\text{ Hz}$ , 1H, 2-H), 1.36-1.46 (m, 3H, 2-H, 4-H, 5-H), 1.57-1.64 (m, 1H, 6-H), 2.41 (s, 3H, ArCH<sub>3</sub>), 3.50 (m<sub>c</sub>, 1H, 1-H), 4.74 (d,  $J = 6.2\text{ Hz}$ , 1H, NH), 7.29 (m<sub>c</sub>, 2H, Ar-H), 7.76 (m<sub>c</sub>, 2H, Ar-H). –  $\delta_C$  (125 MHz; CDCl<sub>3</sub>) 11.4 (C-2'), 21.6 (ArCH<sub>3</sub>), 28.5 (C-1''), 29.4 (C-1'), 30.3 (C-5), 30.8 (C-3), 33.7 (C-2''), 37.1 (C-6), 43.3 (C-2), 45.2 (C-4), 49.8 (C-1), 127.3 (C-Ar), 129.7 (C-Ar), 137.9 (C-Ar), 143.3 (C-Ar). – HRMS (ESI)  $m/z$  calcd for C<sub>17</sub>H<sub>28</sub>NO<sub>2</sub>S [M+H]<sup>+</sup>: 310.1835; found 310.1836. – The enantiomeric excess was measured by HPLC, method E, retention times 71.2 min (major enantiomer), 76.5 min (minor enantiomer): 94% ee. The absolute configuration was assigned in analogy to amide **4a-Et**.

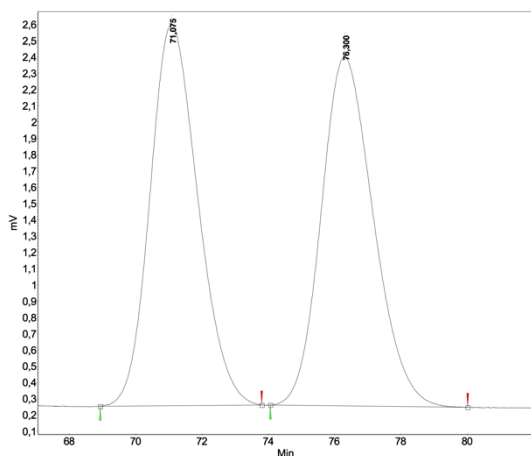

Peak results :

| Index | Name    | Time [Min] | Quantity [% Area] | Height [mV] | Area [mV.Min] | Area % [%] |
|-------|---------|------------|-------------------|-------------|---------------|------------|
| 1     | UNKNOWN | 71.075     | 49.97             | 2.3         | 3.9           | 49.972     |
| 2     | UNKNOWN | 76.300     | 50.03             | 2.1         | 3.9           | 50.028     |
| Total |         |            | 100.00            | 4.5         | 7.8           | 100.000    |

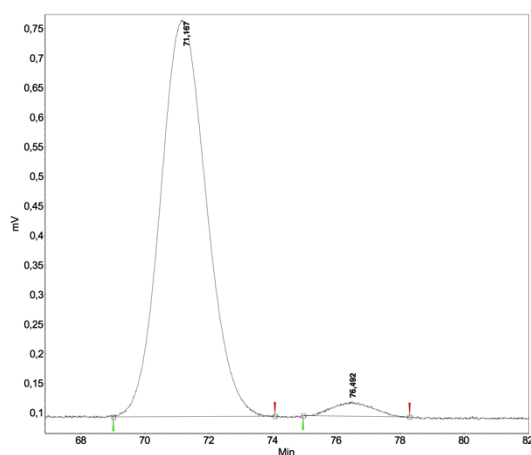

Peak results :

| Index | Name    | Time [Min] | Quantity [% Area] | Height [mV] | Area [mV.Min] | Area % [%] |
|-------|---------|------------|-------------------|-------------|---------------|------------|
| 1     | UNKNOWN | 71.167     | 97.03             | 0.7         | 1.1           | 97.029     |
| 2     | UNKNOWN | 76.492     | 2.97              | 0.0         | 0.0           | 2.971      |
| Total |         |            | 100.00            | 0.7         | 1.1           | 100.000    |

Racemic conjugate addition was performed as follows: Ketimine **1f** (139 mg, 501  $\mu\text{mol}$ ) and CuCl (49.5 mg, 500  $\mu\text{mol}$ ) were dissolved in Et<sub>2</sub>O (2 mL) and cooled to  $-30\text{ }^{\circ}\text{C}$ . EtMgBr (344  $\mu\text{L}$ , 750  $\mu\text{mol}$ , 2.18 M in Et<sub>2</sub>O) was added dropwise, and the reaction mixture was stirred for 1 h at  $-30\text{ }^{\circ}\text{C}$ . Workup and hydrogenation were performed according to the preparation of enantiomerically enriched **4f-Et**, and an analytical sample of the racemic compound was obtained by repeated column chromatography.

#### *N*-[(1*R*,3*R*)-3-Ethyl-3-methylcyclohexyl]-4-methylbenzenesulfonamide (**4g-Et**)

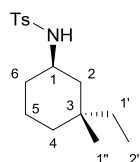

Conjugate addition according to GP 3 using ketimine **1g** (131.7 mg, 500  $\mu\text{mol}$ ), CuTC (9.55 mg, 50.1  $\mu\text{mol}$ ), and ligand *ent*-**L1** (32.4 mg, 60.0  $\mu\text{mol}$ ), reaction time 20 h at  $-15\text{ }^{\circ}\text{C}$ . Hydrogenation according to GP 4 with RuCl(*p*-cymene)[(S,S)-Ts-DPEN] and column chromatography furnished 133 mg of **4g-Et** with minor impurities from unreacted ketimine **1g**. After repeated column chromatography, 80 mg (54%) of amide **4g-Et** were obtained as a colorless oil. – dr (*trans/cis*) before chromatography: 82:18, after repeated chromatography: 81:19.

$R_f$  0.33, pentane/EtOAc 5:1. – mp  $55\text{--}57\text{ }^{\circ}\text{C}$ . – IR (neat)  $\nu_{\text{max}}/\text{cm}^{-1}$  3247, 2963, 2929, 2865, 1447, 1319, 1164, 811, 659, 569, 548. –  $\delta_{\text{H}}$  (500 MHz; CDCl<sub>3</sub>, signals of *cis*-**4g-Et** marked with “#”) 0.64 (t,  $J = 7.5\text{ Hz}$ , 3H, 2'-H), 0.72 (t,  $J = 7.6\text{ Hz}$ , 3H, 2'-H#), 0.75 (s, 3H, 1''-H), 0.85 (t,  $J = 12.4\text{ Hz}$ , 1H, 2-H), 0.89–1.01 (m, 2H, 5-H, 6-H), 1.11–1.26 (m, 2H, 1'-H), 1.32–1.57 (m, 4H, 2-H, 5-H, 4-H), 1.81 (m<sub>c</sub>, 1H, 6-H), 2.42 (s, 3H, ArCH<sub>3</sub>), 3.18 (m<sub>c</sub>, 1H, 1-H), 3.27 (m<sub>c</sub>, 1H, 1-H#), 4.68 (d,  $J = 8.1\text{ Hz}$ , 1H, NH#), 4.71 (d,  $J = 7.7\text{ Hz}$ , 1H, NH), 7.28 (m<sub>c</sub>, 2H, Ar-H), 7.76 (m<sub>c</sub>, 2H, Ar-H). –  $\delta_{\text{C}}$  (125 MHz; CDCl<sub>3</sub>; signals of *cis*-**4g-Et** marked with “#”) 7.5 (C-2#), 7.7 (C-2'), 20.8 (C-4), 21.2 (C-4#), 21.4

(C-1"#), 21.6 (ArCH<sub>3</sub>), 28.3 (C-1'), 28.6 (C-1"), 34.18 (C-6), 34.24 (C-3), 34.4 (C-3#), 34.6 (C-6#), 35.9 (C-5#), 36.3 (C-5), 38.1 (C-1'#), 44.6 (C-2), 44.9 (C-2#), 49.6 (C-1), 50.2 (C-1#), 127.05 (C-Ar#), 127.07 (C-Ar), 129.7 (C-Ar), 138.6 (C-Ar), 138.7 (C-Ar#) 143.2 (C-Ar). – HRMS (ESI) *m/z* calcd for C<sub>16</sub>H<sub>25</sub>NO<sub>2</sub>SNa [M+Na]<sup>+</sup>: 318.1498; found 318.1499. – The enantiomeric excesses were measured by HPLC, method B; *trans*-**4g-Et**: retention times 52.9 min (minor enantiomer), 59.9 min (major enantiomer): 94% ee; *cis*-**4g-Et**: retention times 55.4 min (major enantiomer), 65.1 min (minor enantiomer): 19% ee. The absolute configurations were assigned in analogy to amide **4a-Et**.

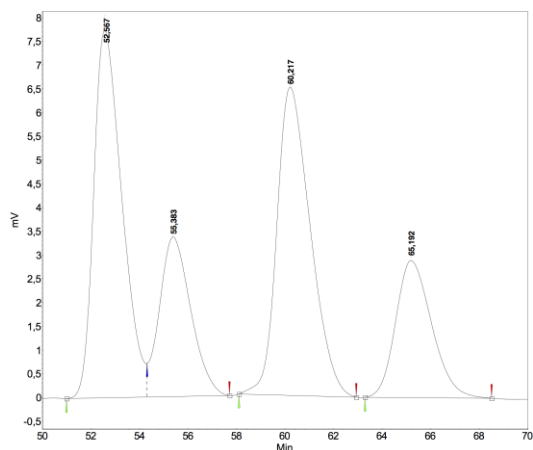

Peak results :

| Index | Name    | Time [Min] | Quantity [% Area] | Height [mV] | Area [mV.Min] | Area % [%] |
|-------|---------|------------|-------------------|-------------|---------------|------------|
| 2     | UNKNOWN | 52.567     | 33.86             | 7.7         | 10.4          | 33.860     |
| 3     | UNKNOWN | 55.383     | 16.31             | 3.4         | 5.0           | 16.308     |
| 4     | UNKNOWN | 60.217     | 33.72             | 6.5         | 10.4          | 33.715     |
| 1     | UNKNOWN | 65.192     | 16.12             | 2.9         | 5.0           | 16.117     |
| Total |         |            | 100.00            | 20.5        | 30.7          | 100.000    |

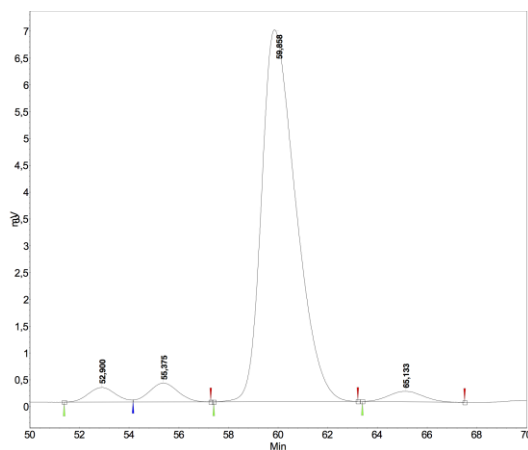

Peak results :

| Index | Name    | Time [Min] | Quantity [% Area] | Height [mV] | Area [mV.Min] | Area % [%] |
|-------|---------|------------|-------------------|-------------|---------------|------------|
| 1     | UNKNOWN | 52.900     | 2.84              | 0.3         | 0.3           | 2.839      |
| 2     | UNKNOWN | 55.375     | 3.85              | 0.3         | 0.5           | 3.849      |
| 3     | UNKNOWN | 59.858     | 90.70             | 6.9         | 11.0          | 90.701     |
| 4     | UNKNOWN | 65.133     | 2.61              | 0.2         | 0.3           | 2.611      |
| Total |         |            | 100.00            | 7.8         | 12.2          | 100.000    |

Racemic conjugate addition was performed as follows: Ketimine **1g** (65.8 mg, 250 μmol) and CuCl (18.6 mg, 188 μmol) were dissolved in Et<sub>2</sub>O (2 mL) and cooled to –15 °C. EtMgBr (172 μL, 375 μmol, 2.18 M in Et<sub>2</sub>O) was added dropwise, and the reaction mixture was stirred for 16 h at –30 °C. Workup was performed according to GP 3. Hydrogenation according to GP 4 with racemic RuCl(*p*-cymene)[Ts-DPEN] (*rac*-**3**, 7.95 mg, 12.5 μmol) and a 5:2 mixture of formic acid and triethyl amine (157 μL, 374 μmol) and repeated column chromatography yielded an analytical sample of the racemic amide **4g-Et**.

#### (*Z*)-*N*-(1,3-Diphenylpent-1-enyl)-4-methylbenzenesulfonamide (**2h-Et**)

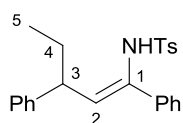

Preparation according to GP 3 from ketimine **1h** (90.4 mg, 250 μmol), CuTC (0.96 mg, 5.0 μmol), ligand **L1** (5.40 mg, 10.0 μmol), and ZnEt<sub>2</sub> (0.25 mL, 0.38 mmol, 1.5 M in toluene) in toluene (2 mL), reaction time 2.5 h at –30 °C. The

crude product was purified by column chromatography, and 67 mg (68%) of enamide **2h-Et** were obtained as a colorless solid.



$R_f$  0.57,  $\text{CH}_2\text{Cl}_2$ . – mp 144 °C. –  $[\alpha]_D^{20}$  –39.3 ( $c$  1.0 in  $\text{CHCl}_3$ ). – IR (neat)  $\nu_{\text{max}}/\text{cm}^{-1}$  3279, 2964, 2927, 1597, 1387, 1305, 1166, 688. –  $\delta_{\text{H}}$  (500 MHz;  $\text{CDCl}_3$ ) 0.66 (t,  $J$  = 7.4 Hz, 3H, 5-H), 1.41-1.49 (m, 1H, 4-H), 1.53-1.60 (m, 1H, 4-H), 2.37 (s, 3H,  $\text{ArCH}_3$ ), 2.94 (dt,  $J$  = 9.0, 7.4 Hz, 1H, 3-H), 5.65 (dd,  $J$  = 9.2, 0.7 Hz, 1H, 2-H), 6.13 (s, 1H, NH), 6.99 (m<sub>c</sub>, 2H, Ar-H), 7.17-7.19 (m, 3H, Ar-H), 7.22-7.26 (m, 5H, Ar-H), 7.37-7.40 (m, 2H, Ar-H), 7.56 (m<sub>c</sub>, 2H, Ar-H). –  $\delta_{\text{C}}$  (125 MHz;  $\text{CDCl}_3$ ) 11.9 (C-5), 21.6 ( $\text{ArCH}_3$ ), 30.6 (C-4), 45.2 (C-3), 126.7 (C-Ar), 127.39 (C-Ar), 127.41 (C-Ar), 127.5 (C-Ar), 128.1 (C-Ar), 128.4 (C-Ar), 128.9 (C-2), 129.6 (C-Ar), 135.0 (C-1), 136.9 (C-Ar), 137.7 (C-Ar), 143.4 (C-Ar), 143.8 (C-Ar). – HRMS (EI)  $m/z$  calcd for  $\text{C}_{24}\text{H}_{25}\text{NO}_2\text{S}$   $[\text{M}]^+$ : 391.1606; found 391.1608. – The enantiomeric excess was measured by HPLC, method F, retention times 44.9 min (minor enantiomer), 52.2 min (major enantiomer): 72% ee. The absolute configuration was not determined.

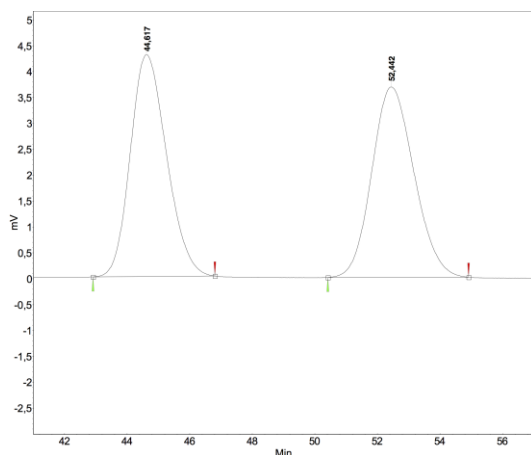

Peak results :

| Index | Name    | Time [Min] | Quantity [% Area] | Height [mV] | Area [mV.Min] | Area % [%] |
|-------|---------|------------|-------------------|-------------|---------------|------------|
| 1     | UNKNOWN | 44.617     | 50.04             | 4.3         | 5.8           | 50.040     |
| 2     | UNKNOWN | 52.442     | 49.96             | 3.7         | 5.8           | 49.960     |
| Total |         |            | 100.00            | 8.0         | 11.5          | 100.000    |

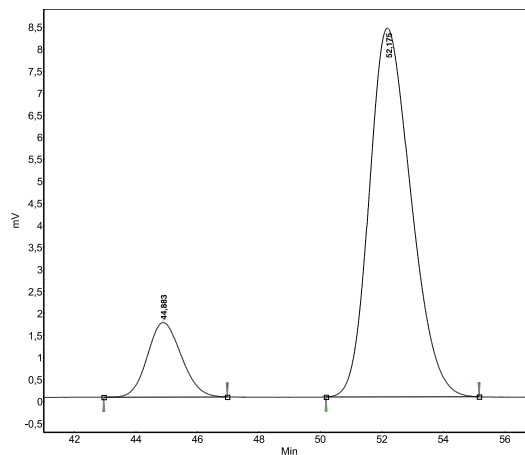

Peak results :

| Index | Name    | Time [Min] | Quantity [% Area] | Height [mV] | Area [mV.Min] | Area % [%] |
|-------|---------|------------|-------------------|-------------|---------------|------------|
| 1     | UNKNOWN | 44.883     | 14.15             | 1.7         | 2.2           | 14.148     |
| 2     | UNKNOWN | 52.175     | 85.85             | 8.4         | 13.1          | 85.852     |
| Total |         |            | 100.00            | 10.1        | 15.3          | 100.000    |

Racemic preparation was performed as described above using racemic *O,O'*-(1,1'-dinaphthyl-2,2'-diyl)-*N,N*-di-*iso*-propylphosphoramidite (4.15 mg, 10.0  $\mu\text{mol}$ ) and yielded 96 mg (98%) of the racemic enamide **2h-Et**, no purification was performed.

#### *N*-[(1*S*,3*S*,5*R*)-3-Ethyl-5-methylcyclohexyl]-4-methylbenzenesulfonamide (**4i-Et**)

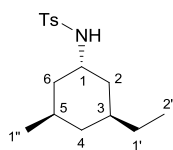

Conjugate addition according to GP 3 from ketimine (*R*)-**1i** (131.7 mg, 500  $\mu\text{mol}$ ), reaction time 1 h at –30 °C, furnished the conjugate addition product **2i-Et** with a dr (*trans/cis*) 48:52. Hydrogenation according to GP 4 yielded 53 mg (36%) of amide (1*S*,3*S*,5*R*)-**4i-Et** as a colorless solid.

$R_f$  0.60, pentane/EtOAc 5:1. – mp 116 °C. –  $[\alpha]_D^{20}$  –6.2 ( $c$  1.0 in  $\text{CHCl}_3$ ). – IR (neat)  $\nu_{\text{max}}/\text{cm}^{-1}$  3276, 2922, 1495, 1162, 1144, 1092, 817, 684, 553. –  $\delta_{\text{H}}$  (500 MHz;  $\text{CDCl}_3$ ) 0.44 (ddd,  $J$  = 12.5,



12.3, 12.1 Hz, 1H, 4-H), 0.75 (t,  $J = 7.5$  Hz, 3H, 2'-H), 0.79 (d,  $J = 6.5$  Hz, 3H, 1''-H), 0.92 (m<sub>c</sub>, 2H, 2-H, 6-H), 1.04-1.17 (m, 2H, 1'-H), 1.24-1.33 (m, 1H, 3-H), 1.46-1.55 (m, 1H, 5-H), 1.57-1.64 (m, 2H, 2-H, 6-H), 1.65-1.68 (m, 1H, 4-H), 2.42 (s, 3H, ArCH<sub>3</sub>), 3.60 (m<sub>c</sub>, 1H, 1-H), 4.82 (d,  $J = 7.2$  Hz, 1H, NH), 7.29 (m<sub>c</sub>, 2H, H-Ar), 7.77 (m<sub>c</sub>, 2H, H-Ar). –  $\delta_C$  (125 MHz; CDCl<sub>3</sub>) 11.2 (C-2'), 21.6 (ArCH<sub>3</sub>), 22.5 (C-1''), 26.8 (C-5), 29.7 (C-1'), 33.4 (C-3), 36.9 (C-6), 39.6 (C-2), 41.0 (C-4), 50.1 (C-1), 127.2 (C-Ar), 129.7 (C-Ar), 138.3 (C-Ar), 143.3 (C-Ar). – HRMS (EI)  $m/z$  calcd for C<sub>16</sub>H<sub>25</sub>NO<sub>2</sub>S [M]<sup>+</sup>: 295.1606; found 295.1601.

Additionally, 51 mg (35%) of *N*-[(3*R*,5*R*)-3-ethyl-5-methylcyclohexyl]-4-methylbenzenesulfonamide were obtained as an oil that crystallized in the freezer. This material is an epimeric mixture at C-1 in a 54:46 ratio.

$R_f$  0.48, pentane/EtOAc 5:1. –  $\delta_H$  (500 MHz; CDCl<sub>3</sub>, signals corresponding to single diastereomers are marked with “#”) 0.65-0.81 (m, 7H), 0.86 (d,  $J = 7.3$  Hz, 3H#), 0.91-0.98 (m, 1H), 1.08-1.26 (m, 3H), 1.34-1.62 (m, 4H), 1.82 (m<sub>c</sub>, 1H), 1.98 (m<sub>c</sub>, 1H#), 2.42 (s, 3H), 3.22 (m<sub>c</sub>, 1H#), 3.31 (m<sub>c</sub>, 1H#), 4.59 (m, 1H), 7.29 (m<sub>c</sub>, 2H), 7.76 (m<sub>c</sub>, 2H). –  $\delta_C$  (125 MHz; CDCl<sub>3</sub>) 11.4, 12.4, 18.6, 21.6, 22.5, 24.8, 26.5, 27.9, 29.7, 32.9, 35.4, 37.0, 37.3, 37.6, 39.7, 41.0, 43.3, 49.0, 127.1, 129.7, 138.6, 138.7, 143.2.

#### *N*-[(1*S*,3*S*)-3-Ethylcyclohexyl]-*tert*-butylsulfonamide (**6a-Et**)

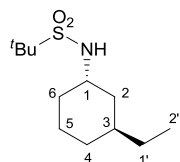

Conjugate addition according to GP 3 using ketimine **5a** (53.8 mg, 250  $\mu$ mol), CuTC (0.96 mg, 5.0  $\mu$ mol), ligand **L1** (5.40 mg, 10.0  $\mu$ mol), and ZnEt<sub>2</sub> (0.25 mL, 0.38 mmol, 1.5 M in toluene) in toluene (2mL), reaction time 20 h at –30 °C.

Hydrogenation according to GP 4 with racemic RuCl(*p*-cymene)[Ts-DPEN] (*rac*-**3**, 7.95 mg, 12.5  $\mu$ mol) and a 5:2 mixture of formic acid and triethyl amine (157  $\mu$ L, 374  $\mu$ mol) yielded 37 mg (60%) of amide **6a-Et** as a colorless oil that crystallized in the freezer. – dr (*trans/cis*) >97:3.

$R_f$  0.30, CH<sub>2</sub>Cl<sub>2</sub>. – mp 54 °C. –  $[\alpha]_D^{20} +1.3$  ( $c$  1.0 in CHCl<sub>3</sub>). – IR (neat)  $\nu_{max}/cm^{-1}$  3290, 2958, 2927, 2873, 1478, 1294, 1124, 677, 514. –  $\delta_H$  (500 MHz; CDCl<sub>3</sub>) 0.87 (t,  $J = 7.4$  Hz, 3H, 2'-H), 0.97-1.05 (m, 1H, 5-H), 1.21-1.27 (m, 2H, 1'-H), 1.38-1.47 (m, 12H, 2-H, 3-H, 4-H, C(CH<sub>3</sub>)<sub>3</sub>), 1.56-1.65 (m, 4H, 4-H, 5-H, 6-H), 1.69-1.74 (m, 1H, 2-H), 3.67 (m<sub>c</sub>, 1H, 1-H), 4.16 (d,  $J = 9.3$  Hz, 1H, NH). –  $\delta_C$  (125 MHz; CDCl<sub>3</sub>) 11.6 (C-2'), 20.6 (C-4), 24.5 (C(CH<sub>3</sub>)<sub>3</sub>), 28.3 (C-1'), 31.0 (C-5), 33.3 (C-6), 34.2 (C-3), 38.8 (C-2), 50.7 (C-1), 59.7 (C(CH<sub>3</sub>)<sub>3</sub>). – HRMS (ESI)  $m/z$  calcd for C<sub>12</sub>H<sub>25</sub>NO<sub>2</sub>SN<sub>a</sub> [M+Na]<sup>+</sup>: 270.1498; found 270.1497. – The enantiomeric excess was measured by GC, method B, retention times 41.3 min (major enantiomer), 41.8 min (minor enantiomer): 95% ee. The absolute configuration was assigned in analogy to amide **4a-Et**.

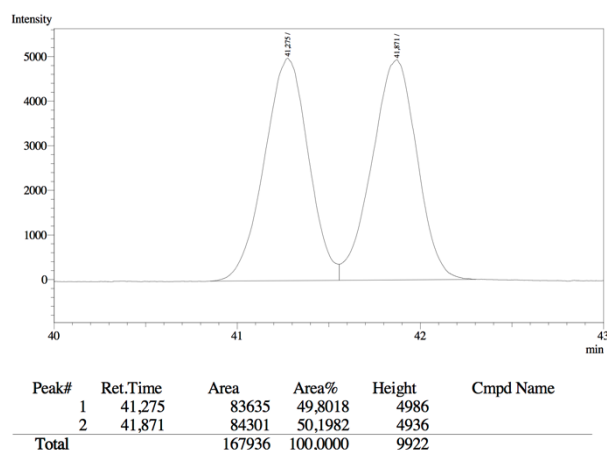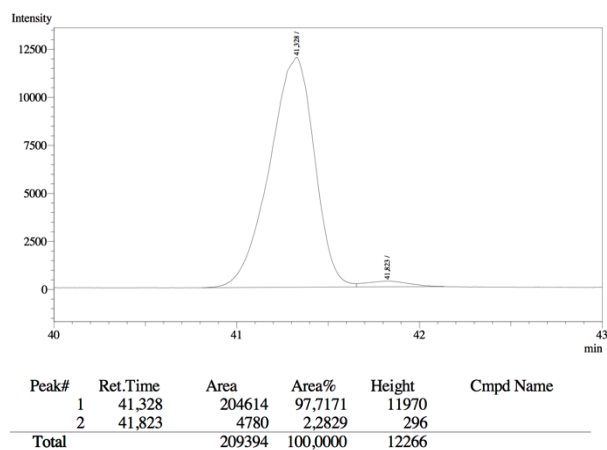

Racemic conjugate addition was performed as follows: CuCl (24.8 mg, 251  $\mu$ mol) was suspended in THF (1 mL) and cooled to  $-30$   $^{\circ}$ C, then EtMgBr (172  $\mu$ L, 375  $\mu$ mol, 2.18 M in Et<sub>2</sub>O) was added dropwise. The reaction mixture was stirred for 15 min, a solution of ketimine **5a** (53.8 mg, 250  $\mu$ mol) in THF (1 mL) was added dropwise, and the reaction mixture was stirred for 1 h at  $-30$   $^{\circ}$ C. Workup was performed according to GP 3. Hydrogenation according to GP 4 with racemic RuCl(*p*-cymene)[Ts-DPEN] (*rac*-**3**, 7.95 mg, 12.5  $\mu$ mol) and a 5:2 mixture of formic acid and triethyl amine (157  $\mu$ L, 374  $\mu$ mol) yielded 13 mg (21%) of the racemic amide **6a-Et**.

#### *N*-[(1*R*,3*S*)-3-Ethylcyclopentyl]-*tert*-butylsulfonamide (**6b-Et**)

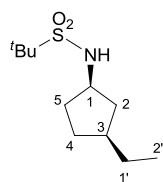

Conjugate addition according to GP 3 using ketimine **5b** (50.3 mg, 250  $\mu$ mol), CuTC (0.96 mg, 5.0  $\mu$ mol), ligand **L1** (5.40 mg, 10.0  $\mu$ mol), and ZnEt<sub>2</sub> (0.25 mL, 0.38 mmol, 1.5 M in toluene) in toluene (2 mL), reaction time 20 h at  $-30$   $^{\circ}$ C.

Hydrogenation according to GP 4 with RuCl(*p*-cymene)[(*S,S*)-Ts-DPEN] ((*S,S*)-**3**, 7.95 mg, 12.5  $\mu$ mol) and a 5:2 mixture of formic acid and triethyl amine (157  $\mu$ L, 374  $\mu$ mol) yielded 42 mg (72%) of amide **6b-Et** as a colorless oil that crystallized in the freezer. – dr (*trans/cis*) before chromatography: 23:77, after chromatography: 23:77.

$R_f$  0.15, CH<sub>2</sub>Cl<sub>2</sub>. – mp 47–49  $^{\circ}$ C. –  $[\alpha]_D^{20}$  +1.3 (*c* 1.0 in CHCl<sub>3</sub>). – IR (neat)  $\nu_{max}/cm^{-1}$  3289, 2958, 2931, 2873, 1477, 1297, 1116, 933, 667. –  $\delta_H$  (500 MHz; CDCl<sub>3</sub>, signals of the minor diastereomer marked with “#”) 0.86 (t, *J* = 7.4 Hz, 3H, 2'-H), 1.02 (ddd, *J* = 12.5, 9.7, 9.7 Hz, 1H, 2-H), 1.09 (ddd, *J* = 9.5, 8.1, 4.2 Hz, 1H, 2-H#), 1.23-1.35 (m, 3H, 1'-H, 4-H), 1.37 (s, 9H, C(CH<sub>3</sub>)<sub>3</sub>), 1.44-1.54 (m, 1H, 5-H), 1.59 (dt, *J* = 13.4, 7.7 Hz, 1H, 2-H#), 1.67-1.78 (m, 2H, 3-H, 4-H), 1.88 (m<sub>c</sub>, 2H, 3-H#), 1.98-2.05 (m, 1H, 5-H), 2.07-2.13 (m, 1H, 5-H#), 2.25 (ddd, *J* = 12.5, 6.8, 6.8 Hz, 1H, 2-H), 3.75 (m<sub>c</sub>, 1H, 1-H), 3.83 (m<sub>c</sub>, 1H, 1-H#), 4.09 (d, *J* = 9.2 Hz, 1H, NH), 4.14 (d, *J* = 9.2 Hz, 1H, NH#). –  $\delta_C$  (125 MHz; CDCl<sub>3</sub>, signals of the minor diastereomer marked with “#”) 12.8 (C-2'), 24.5 (C(CH<sub>3</sub>)<sub>3</sub>), 29.1 (C-1'), 29.3 (C-1'), 29.7 (C-4), 30.6 (C-4#), 33.9 (C-5), 35.1 (C-5#), 39.4 (C-3#), 39.8 (C-3), 40.7 (C-2#), 41.8 (C-2), 56.1 (C-1#), 56.4 (C-1), 59.61 (C(CH<sub>3</sub>)<sub>3</sub>), 59.63 (C(CH<sub>3</sub>)<sub>3</sub>#). –

HRMS (ESI)  $m/z$  calcd for  $C_{11}H_{23}NO_2SNa$   $[M+Na]^+$ : 256.1342; found 256.1339. – The enantiomeric excess was measured by GC, method B, retention times 46.2 min (major enantiomer), 47.1 min (minor enantiomer): 69% ee. Enantiomers of the minor diastereomer could not be separated; the absolute configuration was assigned in analogy to amide **4a-Et**.

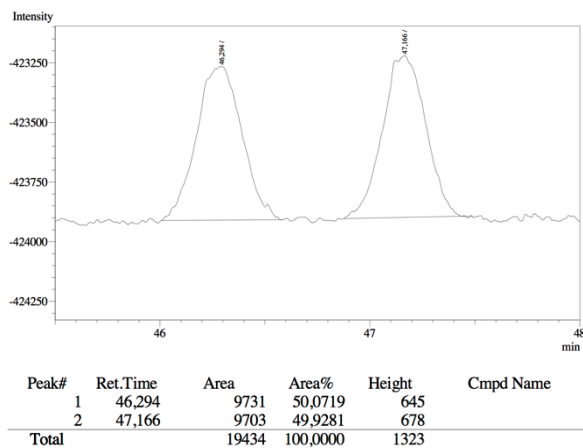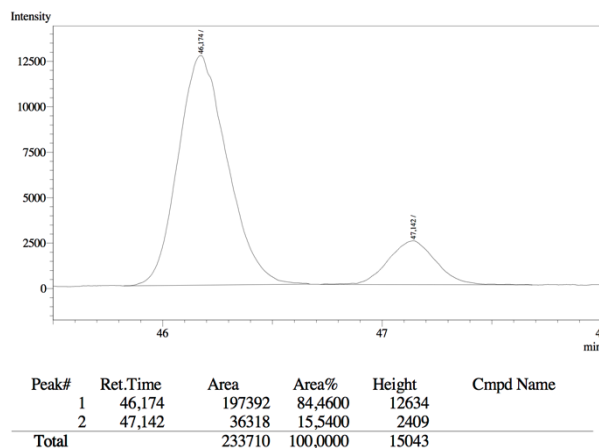

Racemic conjugate addition was performed as described above using racemic *O,O'*-(1,1'-dinaphthyl-2,2'-diyl)-*N,N*-di-*iso*-propylphosphoramidite (4.15 mg, 10.0  $\mu$ mol). The crude conjugate addition product was dissolved in EtOH (2 mL),  $NaBH_4$  (94.5 mg, 2.50 mmol) was added, and the reaction mixture was stirred for 16 h at rt. The reaction mixture was then poured into saturated aqueous  $NH_4Cl$  (10 mL), extracted with  $CH_2Cl_2$  ( $3 \times 10$  mL), dried over  $MgSO_4$ , filtered, and concentrated under reduced pressure. Column chromatography over silica gel yielded 17 mg (29%) of the racemic amide **6b-Et**.

#### *N*-[(1*S*,3*S*)-3-Ethylcycloheptyl]-*tert*-butylsulfonamide (**6c-Et**)

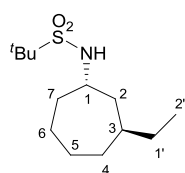

Conjugate addition according to GP 3 using ketimine **5c** (57.3 mg, 250  $\mu$ mol), CuTC (0.96 mg, 5.0  $\mu$ mol), ligand **L1** (5.40 mg, 10.0  $\mu$ mol), and  $ZnEt_2$  (0.25 mL, 0.38 mmol, 1.5 M in toluene) in toluene (2 mL), reaction time 16 h at  $-30$  °C.

Hydrogenation according to GP 4 with racemic  $RuCl(p\text{-cymene})[Ts\text{-DPEN}]$  (*rac*-**3**, 7.95 mg, 12.5  $\mu$ mol) and a 5:2 mixture of formic acid and triethyl amine (157  $\mu$ L, 374  $\mu$ mol) yielded 43 mg (66%) of amide **6c-Et** as a colorless oil that crystallized in the freezer. – dr (*trans/cis*) before chromatography: 96:4, after chromatography: 97:3.

$R_f$  0.17, pentane/EtOAc 15:1. – mp 35 °C. –  $[\alpha]_D^{20}$   $-9.2$  ( $c$  1.0 in  $CHCl_3$ ). – IR (neat)  $\nu_{max}/cm^{-1}$  3268, 2921, 2855, 1440, 1306, 1125, 1048, 666. –  $\delta_H$  (500 MHz;  $CDCl_3$ ) 0.88 (t,  $J$  = 7.4 Hz, 3H, 2'-H), 1.09-1.17 (m, 1H, 4-H), 1.24-1.46 (m, 14H, 1'-H, 3-H, 5-H, 6-H,  $C(CH_3)_3$ ), 1.53-1.60 (m, 1H, 7-H), 1.65-1.82 (m, 5H, 2-H, 4-H, 5-H, 6-H), 2.01 (m, 1H, 7-H), 3.62 (m, 1H, 1-H), 3.99 (d,  $J$  = 9.8 Hz, 1H, NH). –  $\delta_C$  (125 MHz;  $CDCl_3$ ) 11.9 (C-2'), 24.4 ( $C(CH_3)_3$ ), 25.5 (C-5), 28.3 (C-6),

30.5 (C-1'), 34.4 (C-4), 36.2 (C-3), 37.3 (C-7), 42.1 (C-2), 54.2 (C-1), 59.7 (C(CH<sub>3</sub>)<sub>3</sub>). – HRMS (ESI)  $m/z$  calcd for C<sub>13</sub>H<sub>27</sub>NO<sub>2</sub>SNa [M+Na]<sup>+</sup>: 284.1655; found 284.1651. – The enantiomeric excess was measured by GC, method C, retention times 66.7 min (major enantiomer), 67.1 min (minor enantiomer): ~92% ee. The absolute configuration was assigned in analogy to amide **4a-Et**.

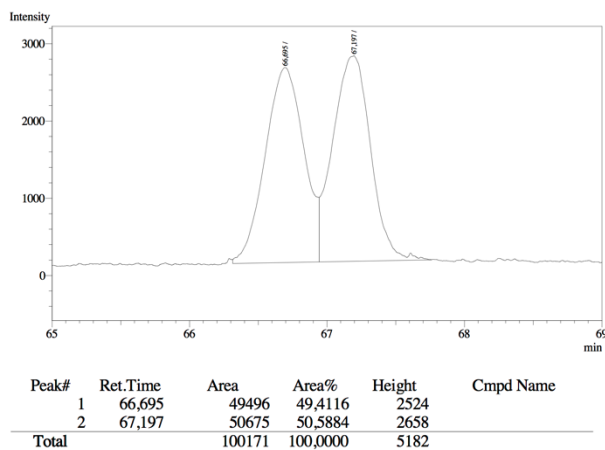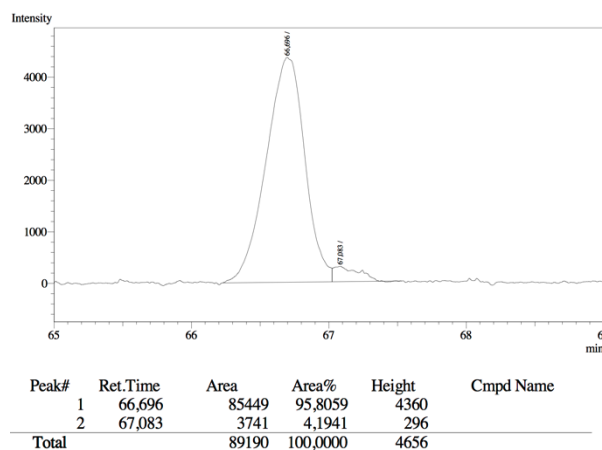

Racemic preparation was performed as described above using racemic *O,O'*-(1,1'-dinaphthyl-2,2'-diyl)-*N,N*-di-*iso*-propylphosphoramidite (4.15 mg, 10.0  $\mu$ mol) and yielded 30 mg (46%) of the racemic amide **6c-Et**.

#### *N*-Diphenylphosphinoyl-(1*S*\*,3*S*\*)-3-ethylcyclohexylamide (**8a-Et**)

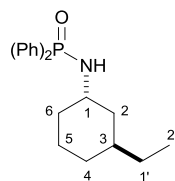

Conjugate addition according to GP 3 using ketimine **7a** (73.8 mg, 250  $\mu$ mol), CuTC (0.96 mg, 5.0  $\mu$ mol), ligand **L1** (5.40 mg, 10.0  $\mu$ mol), and ZnEt<sub>2</sub> (0.25 mL, 0.38 mmol, 1.5 M in toluene) in toluene (2 mL), reaction time 20 h at –30 °C. The crude product was dissolved in THF (2.5 mL), and L-Selectride® (0.55 mL,

0.55 mmol, 1.0 M in THF) was added. The solution was stirred for 2.5 h and cooled to 0 °C, and H<sub>2</sub>O (0.5 mL), aqueous NaOH (0.1 mL, 15 w/w), and H<sub>2</sub>O<sub>2</sub> (0.1 mL, 30 w/w in H<sub>2</sub>O) were added subsequently. The mixture was stirred for 0.5 h at 0 °C and poured onto a mixture of H<sub>2</sub>O (10 mL) and MTBE (10 mL). The organic phase was separated, and the aqueous phase was extracted with MTBE (2  $\times$  10 mL). The combined organic phases were washed with brine (10 mL), dried over MgSO<sub>4</sub>, filtered, and concentrated under reduced pressure. Purification by flash column chromatography over silica gel yielded 51 mg (62%) of amide **8a-Et** as a colorless solid. – dr (*trans/cis*) >97:3.

$R_f$  0.35, CH<sub>2</sub>Cl<sub>2</sub>/THF 85:15. – mp 117-118°C. – IR (neat)  $\nu_{max}/cm^{-1}$  3199, 2924, 1437, 1186, 1121, 1109, 748, 721, 693, 555, 526. –  $\delta_H$  (500 MHz; CDCl<sub>3</sub>) 0.83 (t,  $J$  = 7.4 Hz, 3H, 2'-H), 0.95-1.02 (m, 1H, 4-H), 1.15-1.24 (m, 2H, 1'-H), 1.30-1.36 (m, 1H, 2-H), 1.42-1.74 (m, 7H, 2-H, 3-H, 4-H, 5-H, 6-H), 3.44 (m<sub>c</sub>, 1H, 1-H), 7.42-7.46 (m, 4H, Ar-H), 7.47-7.51 (m, 2H, Ar-H), 7.88-7.94 (m, 4H, Ar-H). –  $\delta_C$  (125 MHz; CDCl<sub>3</sub>) 11.6 (C-2'), 20.5 (C-5), 28.5 (C-1'), 31.2 (C-4), 34.0 (C-6), 34.1

(C-3), 39.7 (d,  $J_{C,P} = 4.8$  Hz, C-2), 46.9 (C-1), 128.6 (d,  $J_{C,P} = 12.5$  Hz, C-Ar), 131.9 (C-Ar), 132.2 (d,  $J_{C,P} = 9.5$  Hz, C-Ar), 132.4 (d,  $J_{C,P} = 9.4$  Hz, C-Ar). – HRMS (ESI)  $m/z$  calcd for  $C_{20}H_{26}NOPNa$   $[M+Na]^+$ : 350.1644; found 350.1633. – The enantiomeric excess was measured by HPLC, method G, retention times 18.7 min (first enantiomer), 20.0 min (second enantiomer): 0% ee.

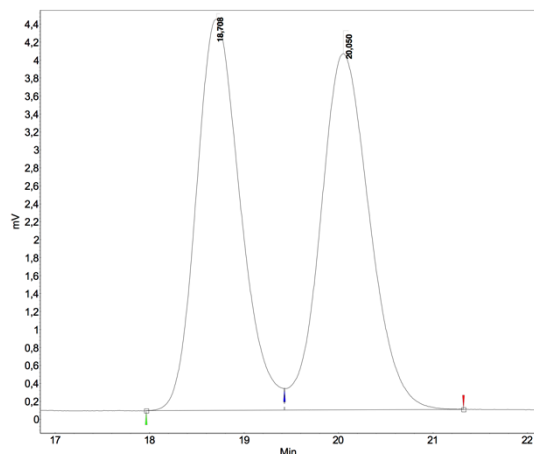

Peak results :

| Index | Name    | Time [Min] | Quantity [% Area] | Height [mV] | Area [mV.Min] | Area % [%] |
|-------|---------|------------|-------------------|-------------|---------------|------------|
| 1     | UNKNOWN | 18.708     | 49.59             | 4.4         | 2.3           | 49.591     |
| 2     | UNKNOWN | 20.050     | 50.41             | 4.0         | 2.4           | 50.409     |
| Total |         |            | 100.00            | 8.3         | 4.7           | 100.000    |

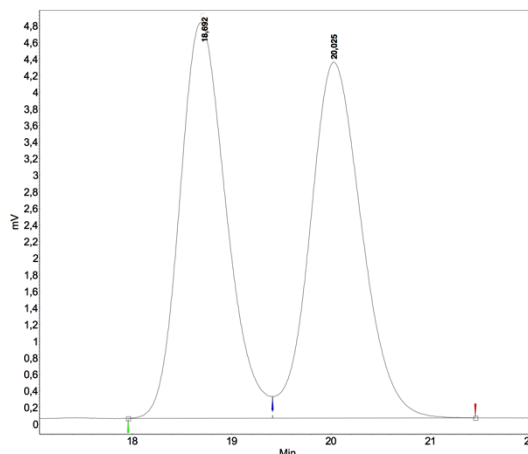

Peak results :

| Index | Name    | Time [Min] | Quantity [% Area] | Height [mV] | Area [mV.Min] | Area % [%] |
|-------|---------|------------|-------------------|-------------|---------------|------------|
| 1     | UNKNOWN | 18.692     | 49.98             | 4.8         | 2.6           | 49.975     |
| 2     | UNKNOWN | 20.025     | 50.02             | 4.3         | 2.6           | 50.025     |
| Total |         |            | 100.00            | 9.1         | 5.1           | 100.000    |

Racemic preparation was performed as described above using racemic *O,O'*-(1,1'-dinaphthyl-2,2'-diyl)-*N,N*-di-*iso*-propylphosphoramidite (4.15 mg, 10.0  $\mu$ mol) and yielded 44 mg (54%) of the racemic amide **8a-Et**.

#### *tert*-Butyl-(1*S*,3*S*)-3-ethylcyclohexylcarbamate (**9a-Et**)

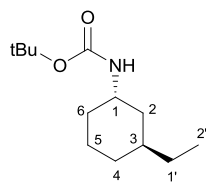

A solution of amide **4a-Et** (84 mg, 0.30 mmol) in  $CH_3CN$  (1 mL) was treated with di-*tert*-butyldicarbonate (97.7 mg, 448  $\mu$ mol) and 4-(dimethylamino)pyridine (3.65 mg, 29.9  $\mu$ mol) and stirred for 1 h at rt. The reaction mixture was poured onto MTBE (5 mL), washed subsequently with saturated aqueous  $NH_4Cl$  (5 mL), saturated aqueous  $NaHCO_3$  (5 mL), and brine (5 mL), dried over  $MgSO_4$ , filtered, and concentrated under reduced pressure. The residue was dissolved in MeOH (4 mL), Mg powder (36.3 mg, 1.49 mmol) was added, and the suspension was stirred at rt under ultrasonication. After 48 min, the suspension was filtered through a pad of celite, and the solvent was removed under reduced pressure. Purification by flash column chromatography over silica gel furnished 57 mg (84%) of carbamate **9a-Et** as a colorless solid.

$R_f$  0.58,  $CH_2Cl_2$ . – mp 45 °C. –  $[\alpha]_D^{20} +2.5$  ( $c$  1.0 in  $CHCl_3$ ). – IR (neat)  $\nu_{max}/cm^{-1}$  3369, 2924, 1681, 1517, 1162, 1047, 1020, 609. –  $\delta_H$  (500 MHz;  $CDCl_3$ ) 0.84 (t,  $J = 7.4$  Hz, 3H, 2'-H), 0.96-1.03 (m, 1H, 4-H), 1.20-1.39 (m, 6H, 1'-H, 2-H, 3-H, 5-H, 6-H), 1.43 (s, 9H,  $C(CH_3)_3$ ), 1.51-1.58

(m, 2H, 5-H, 6-H), 1.60-1.66 (m, 2H, 2-H, 4-H), 3.80, (m<sub>c</sub>, 1H, 1-H), 4.63 (bs, 1H, NH). –  $\delta_c$  (125 MHz; CDCl<sub>3</sub>) 11.6 (C-2'), 20.7 (C-5), 28.6 (C(CH<sub>3</sub>)<sub>3</sub>, C-1'), 31.4 (C-4), 31.5 (C-6), 34.3 (C-3), 37.2 (C-2), 45.9 (C-1), 79.0 (C(CH<sub>3</sub>)<sub>3</sub>), 155.3 (CO). – HRMS (ESI)  $m/z$  calcd for C<sub>13</sub>H<sub>25</sub>NO<sub>2</sub>Na [M+Na]<sup>+</sup>: 250.1778; found 250.1780.

## 2) Monitoring of the 1,4-Addition by Continuous IR Detection

A 10 mL three-necked flask, equipped with the probe of a Mettler-Toledo ReactIR® device, was charged with a mixture of copper(I)-thiophene-2-carboxylate (3.82 mg, 20.0  $\mu\text{mol}$ ), ligand **L1** (21.6 mg, 40.0  $\mu\text{mol}$ ), and ketimine **1a** (249 mg, 0.999 mmol). Toluene (8 mL) was added, and the solution was stirred for 0.5 h at rt and then cooled to  $-30\text{ }^{\circ}\text{C}$ .  $\text{ZnEt}_2$  (1.0 mL, 1.5 mmol, 1.5 M in toluene) was added rapidly, and simultaneously, data collection was started ( $t = 0\text{ min}$ ). Then, the resulting yellow solution was stirred at  $-30\text{ }^{\circ}\text{C}$  for 24 min.

Data analysis was performed using the decreasing IR band at  $1320\text{ cm}^{-1}$  to determine conversion and the increasing IR band at  $1129\text{ cm}^{-1}$  to determine product formation. Raw data is plotted in Fig. 1, while Fig. 2 gives an overview of all IR absorptions within the monitored reaction time.

*We are indebted to Dr. Jennifer A. Allen, application specialist at Mettler-Toledo, for technical advisory concerning data acquisition and analysis.*

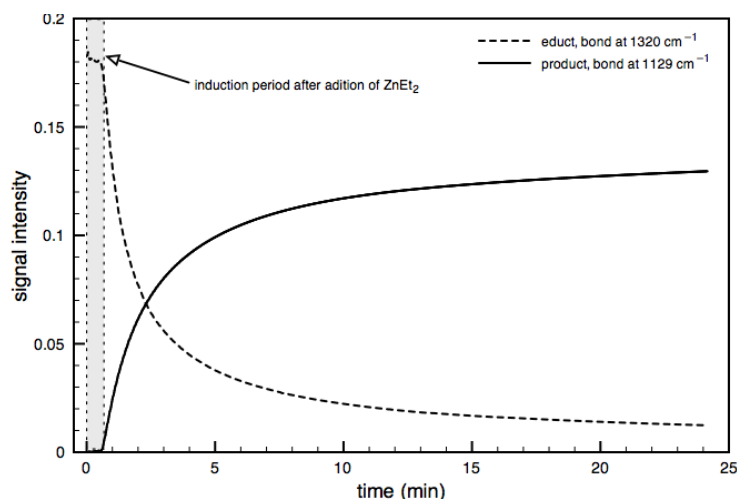

Figure 1: Monitoring of the 1,4-addition by continuous IR detection, sampling rate  $>5\text{ Hz}$ .

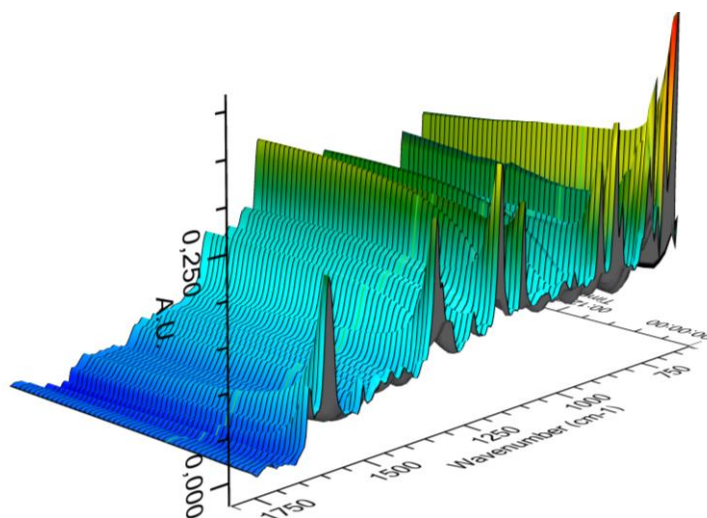

Figure 2: Overview of all IR band intensities over time.

### 3) $^1\text{H}$ and $^{13}\text{C}$ NMR spectra

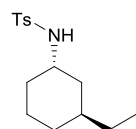

*trans*-4a-Et

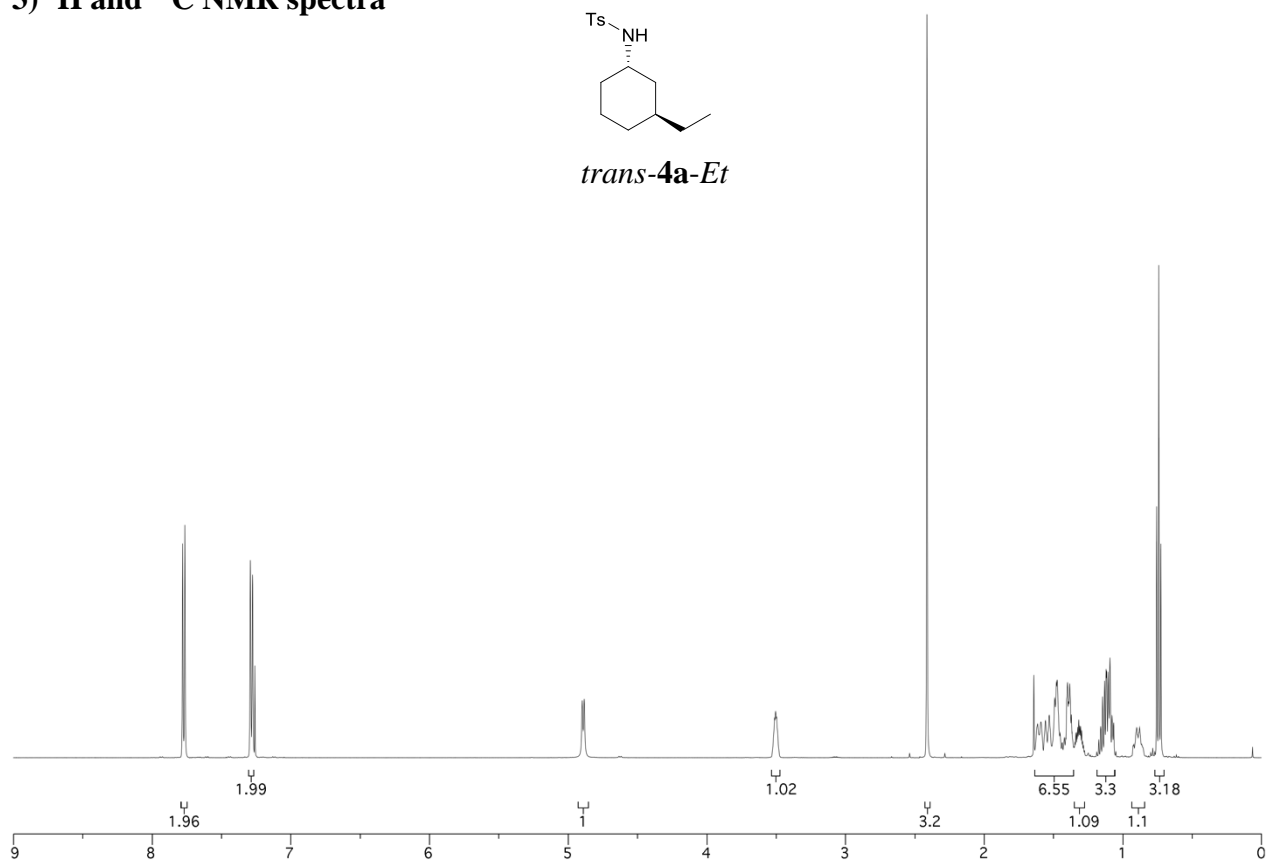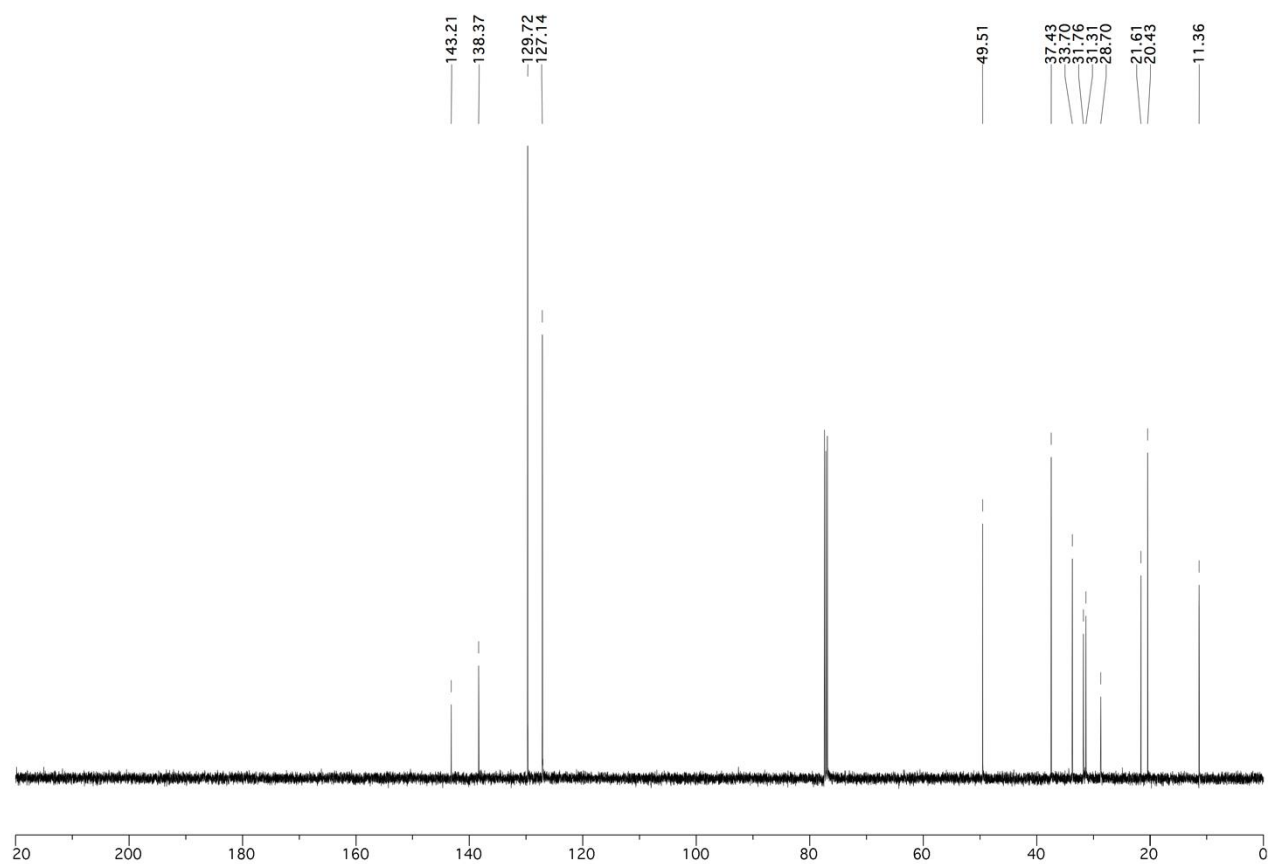



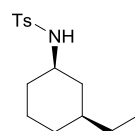

*cis*-4a-Et

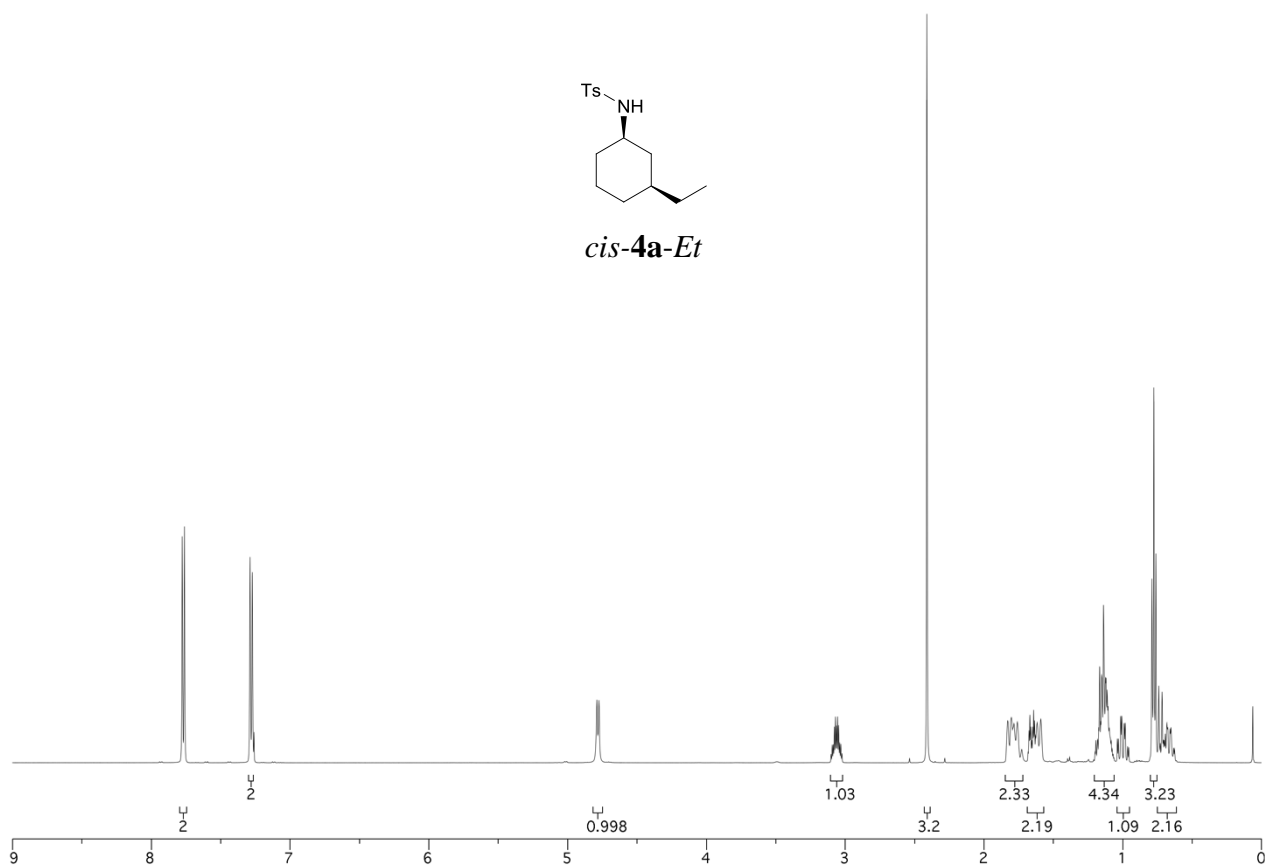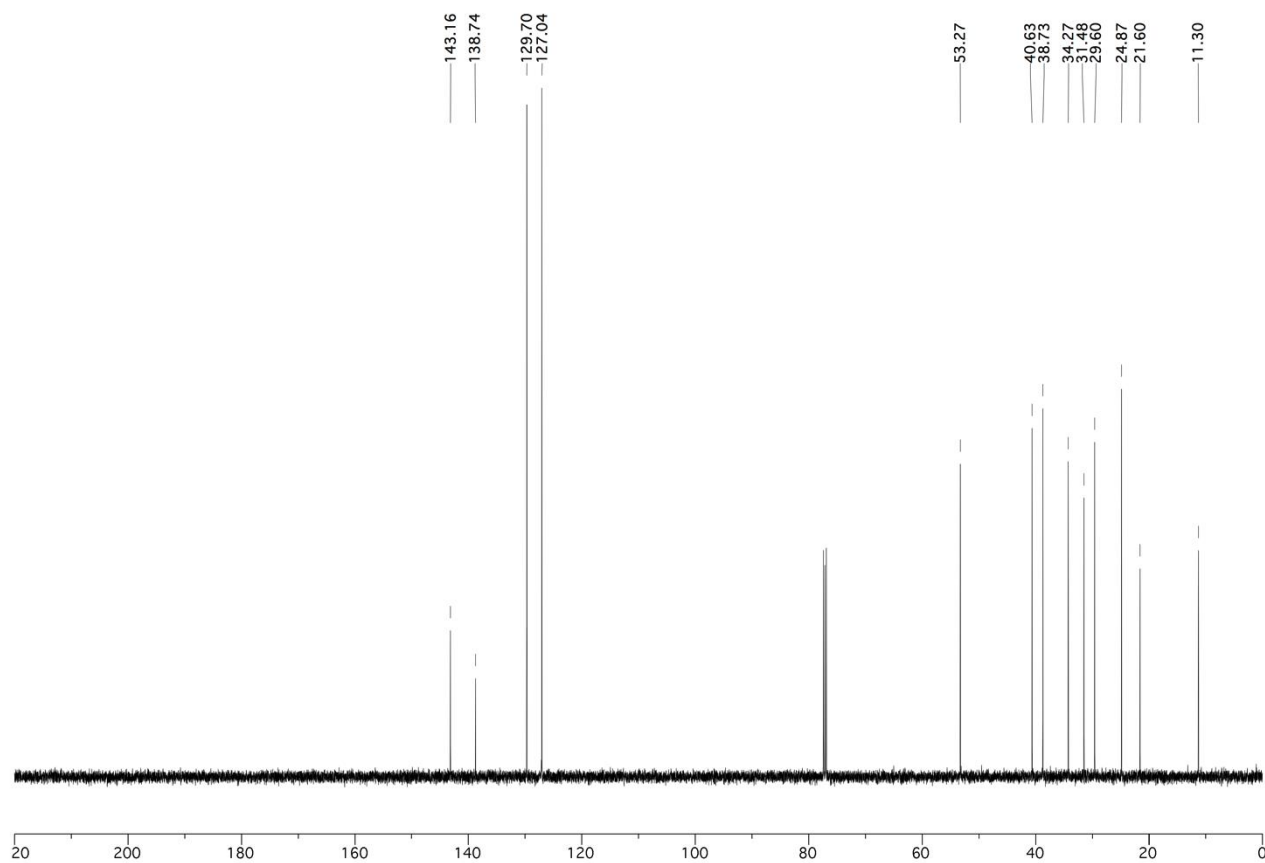

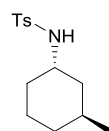

**4a-Me**

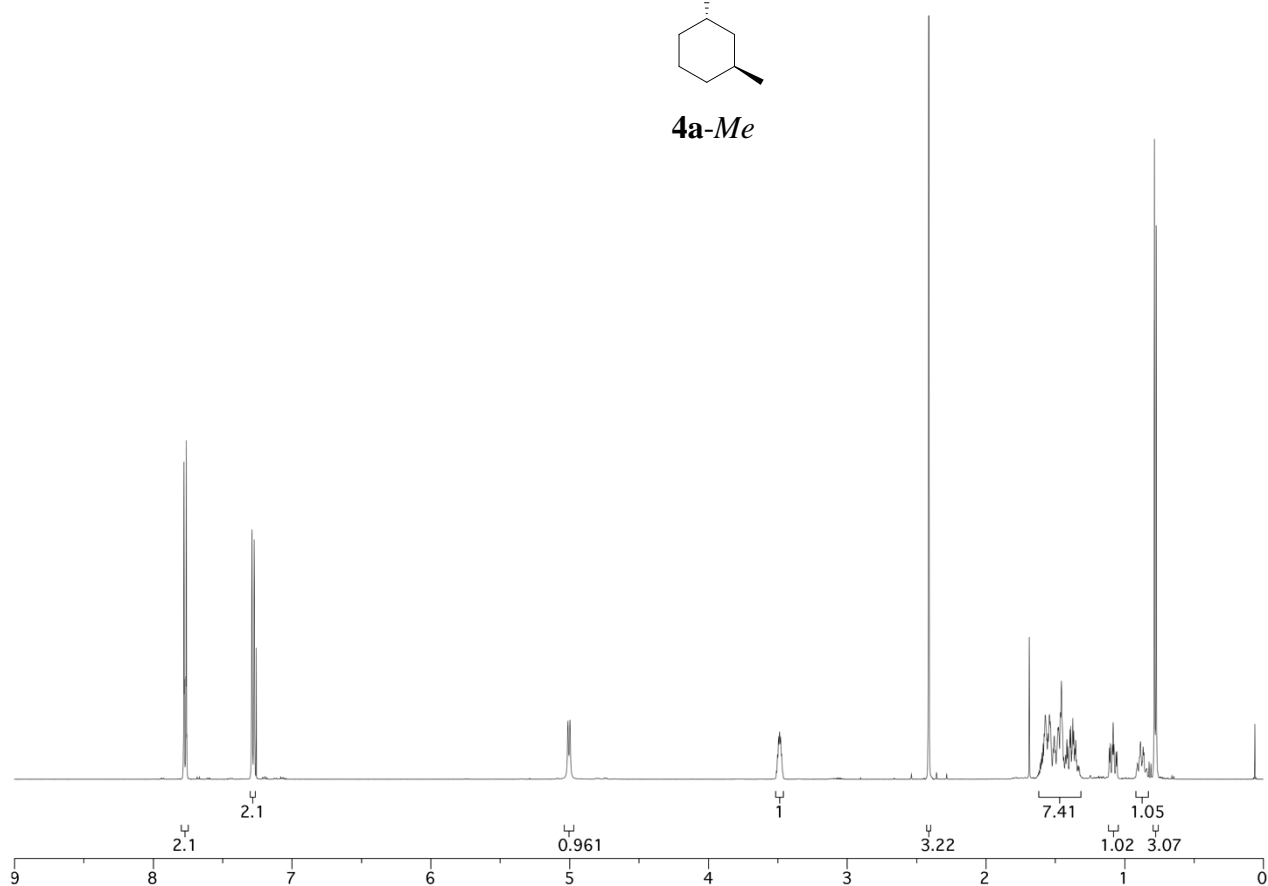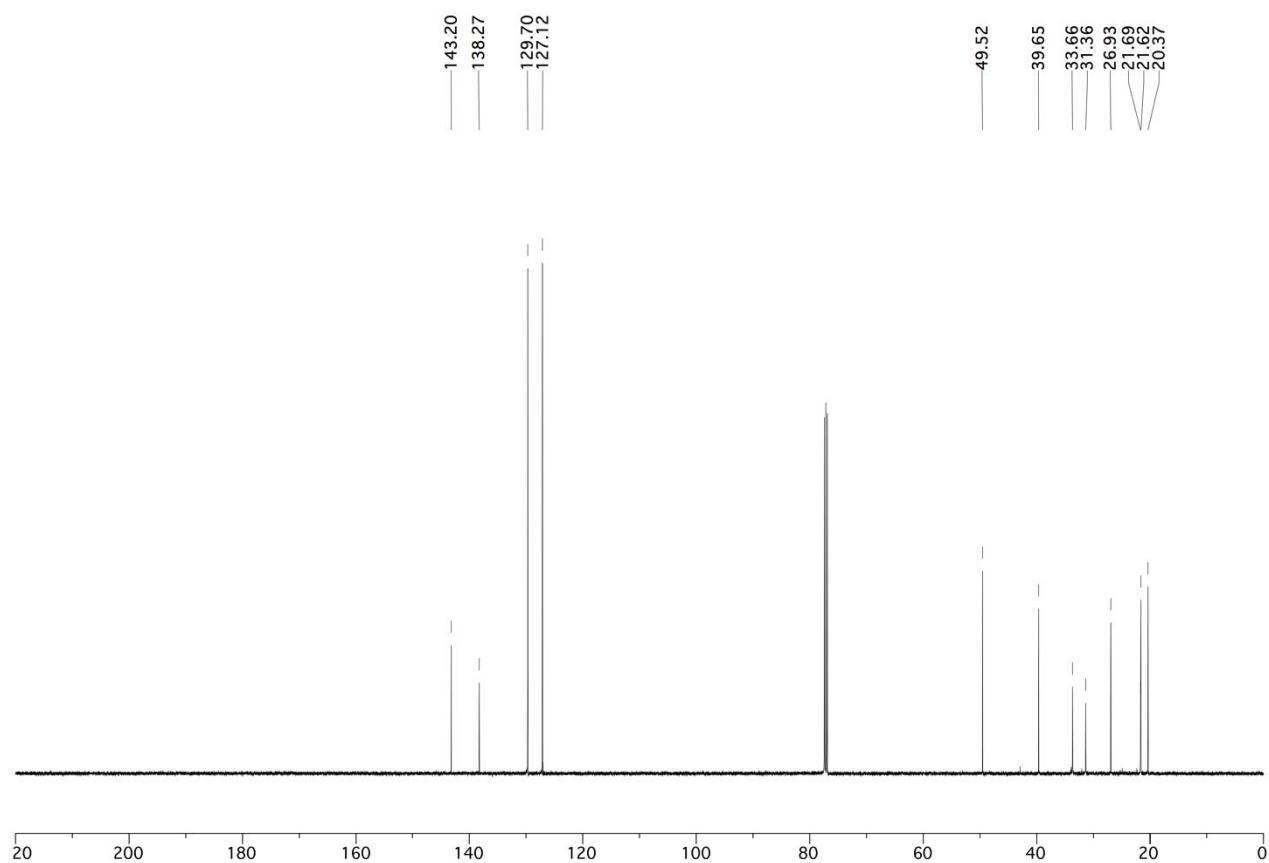

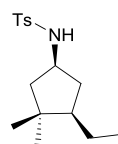

**4b-Et**

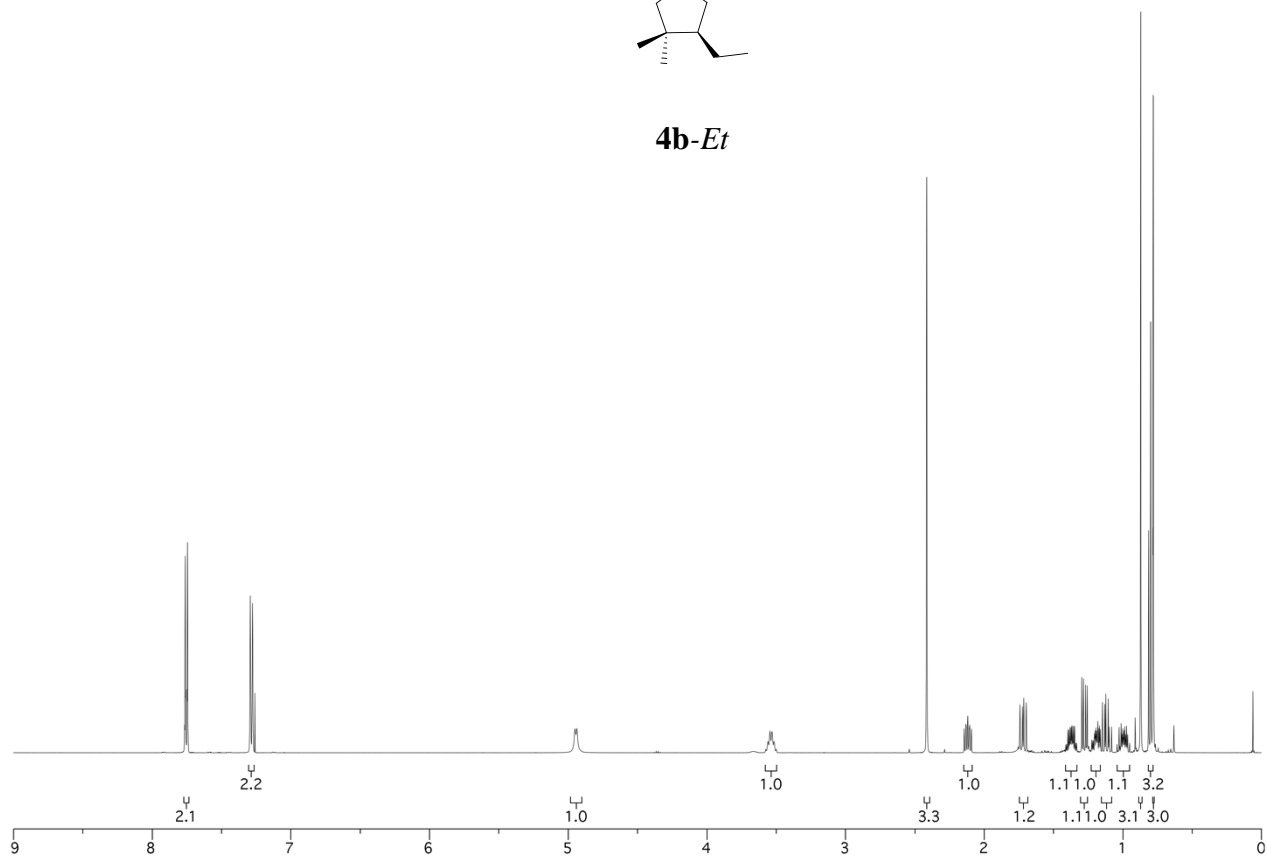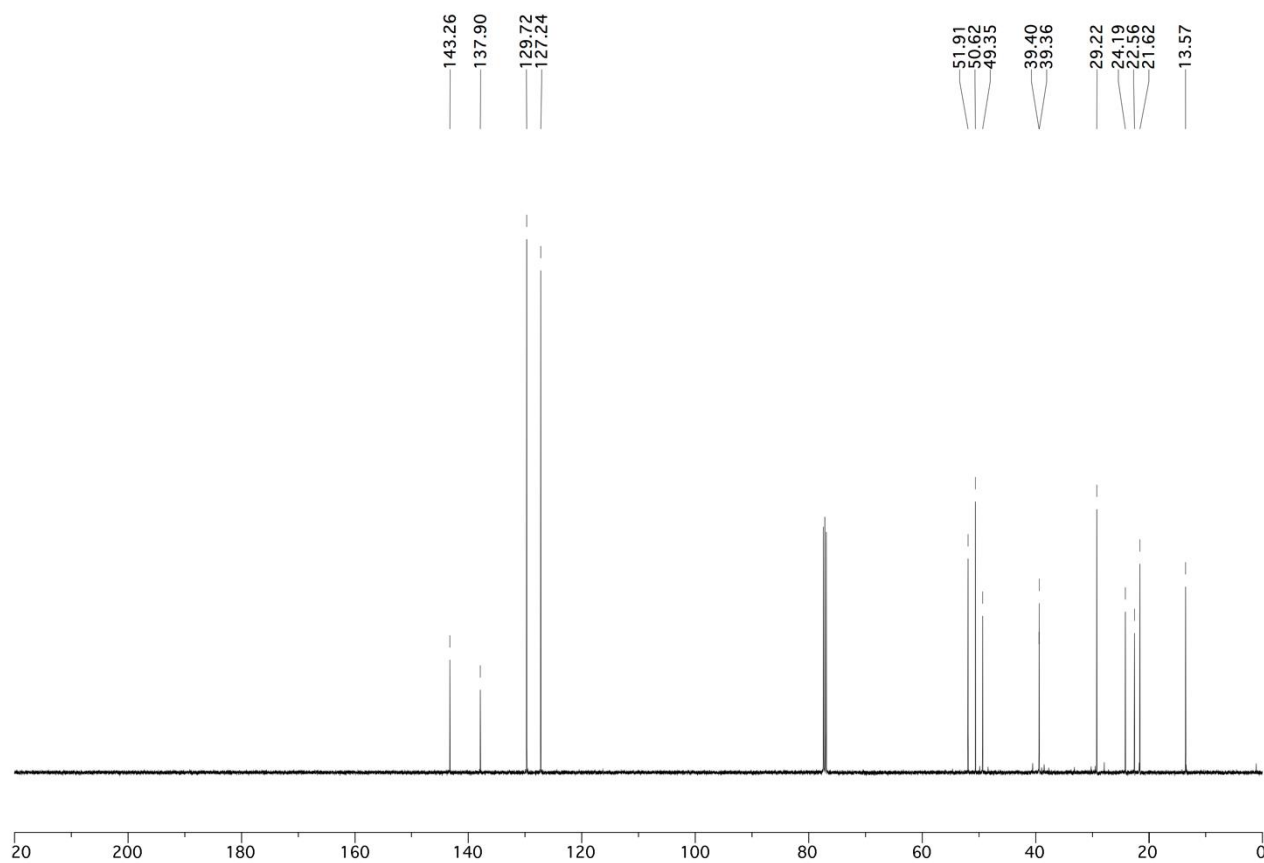

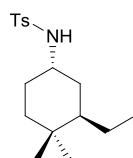

**4c-Et**

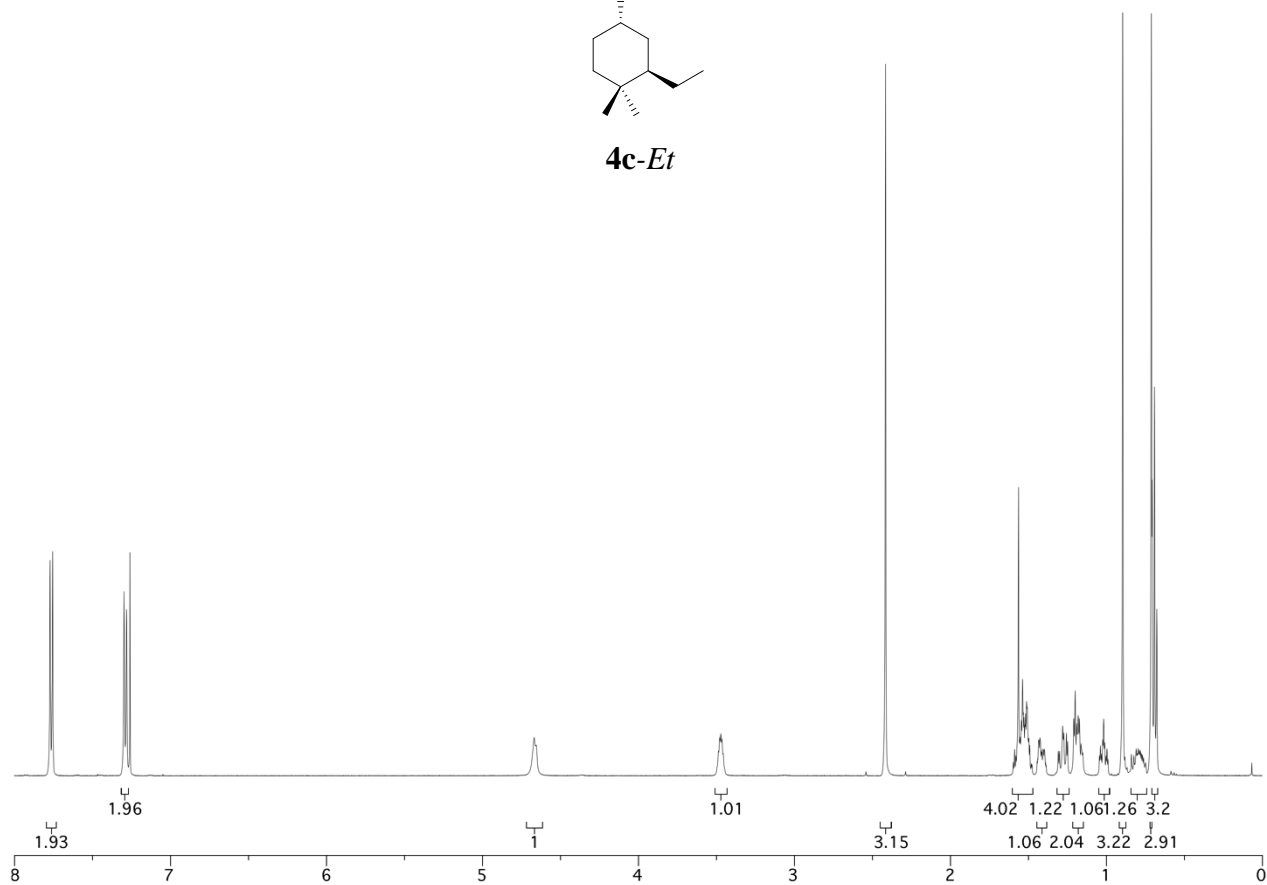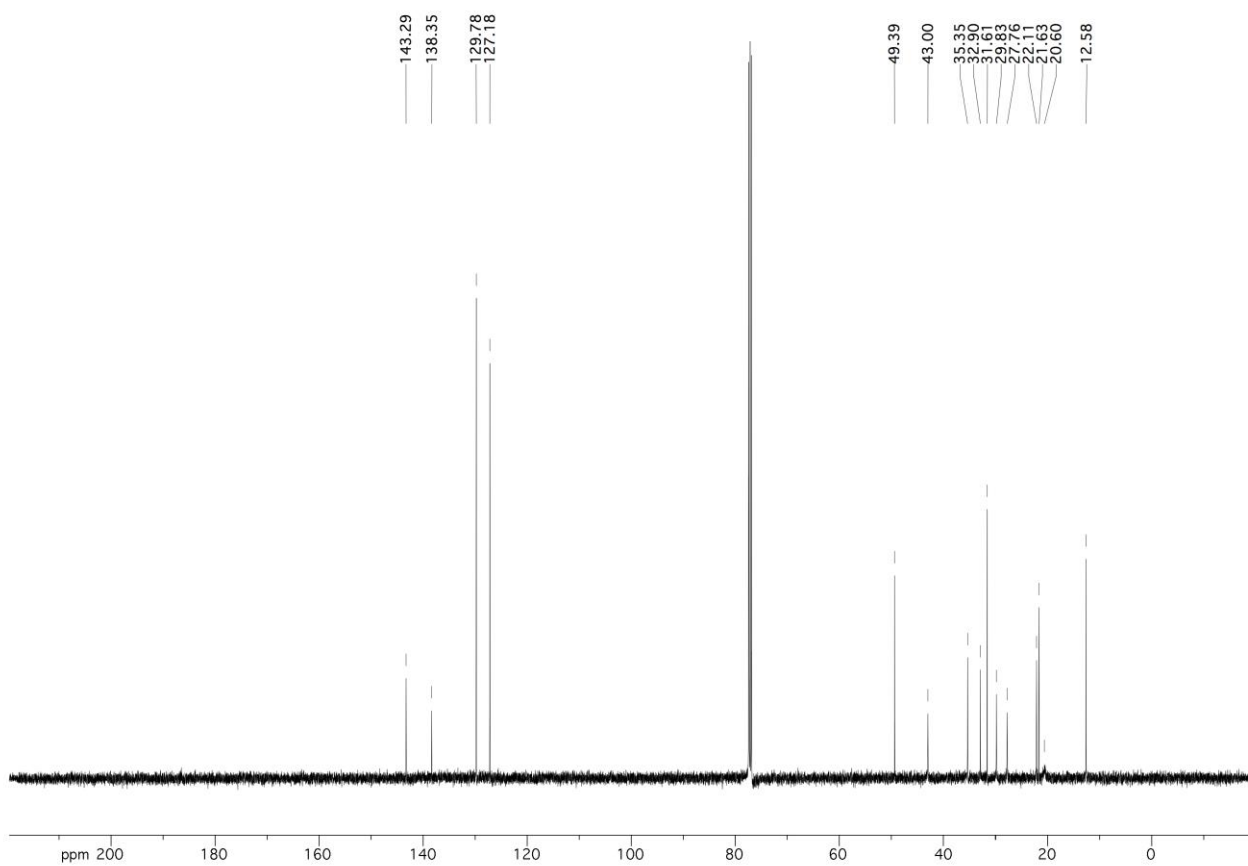

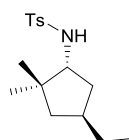

**4d-Et**, dr (*trans/cis*) 64:36

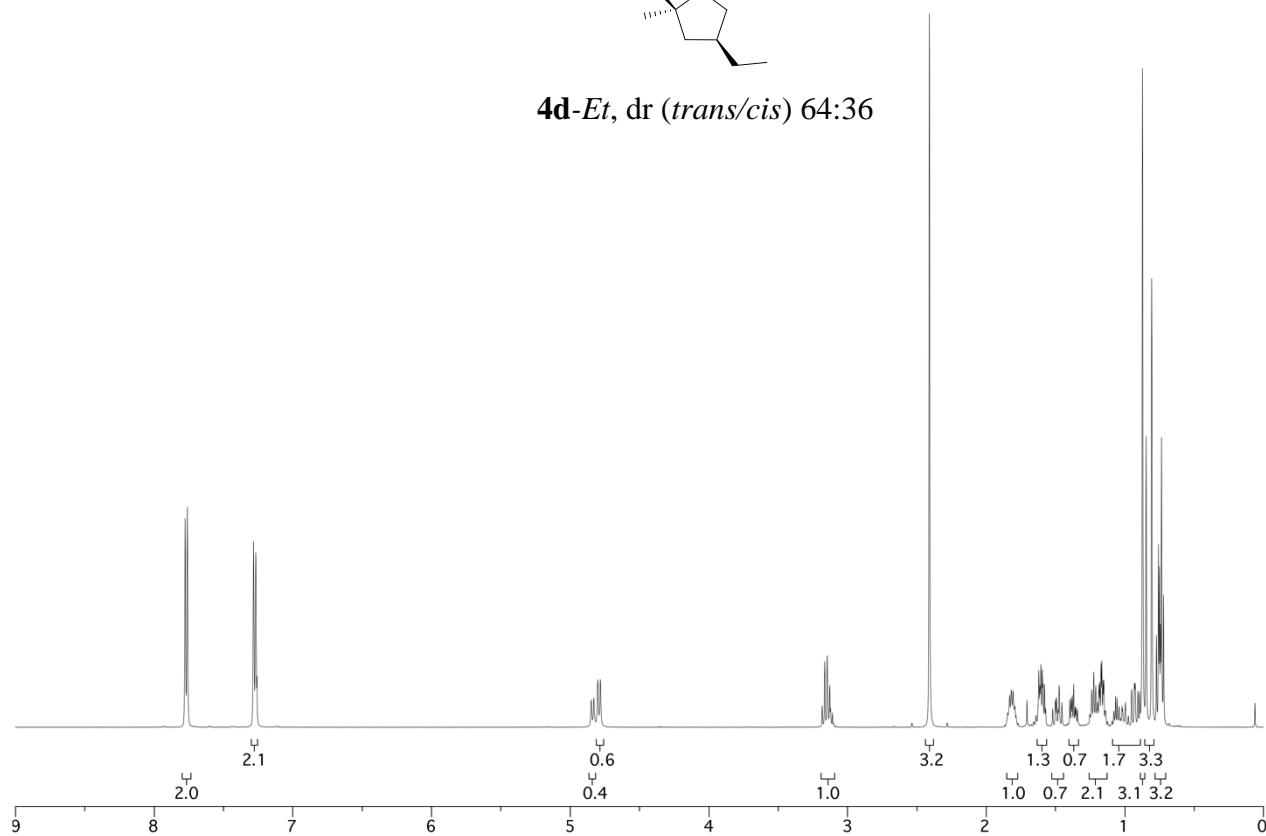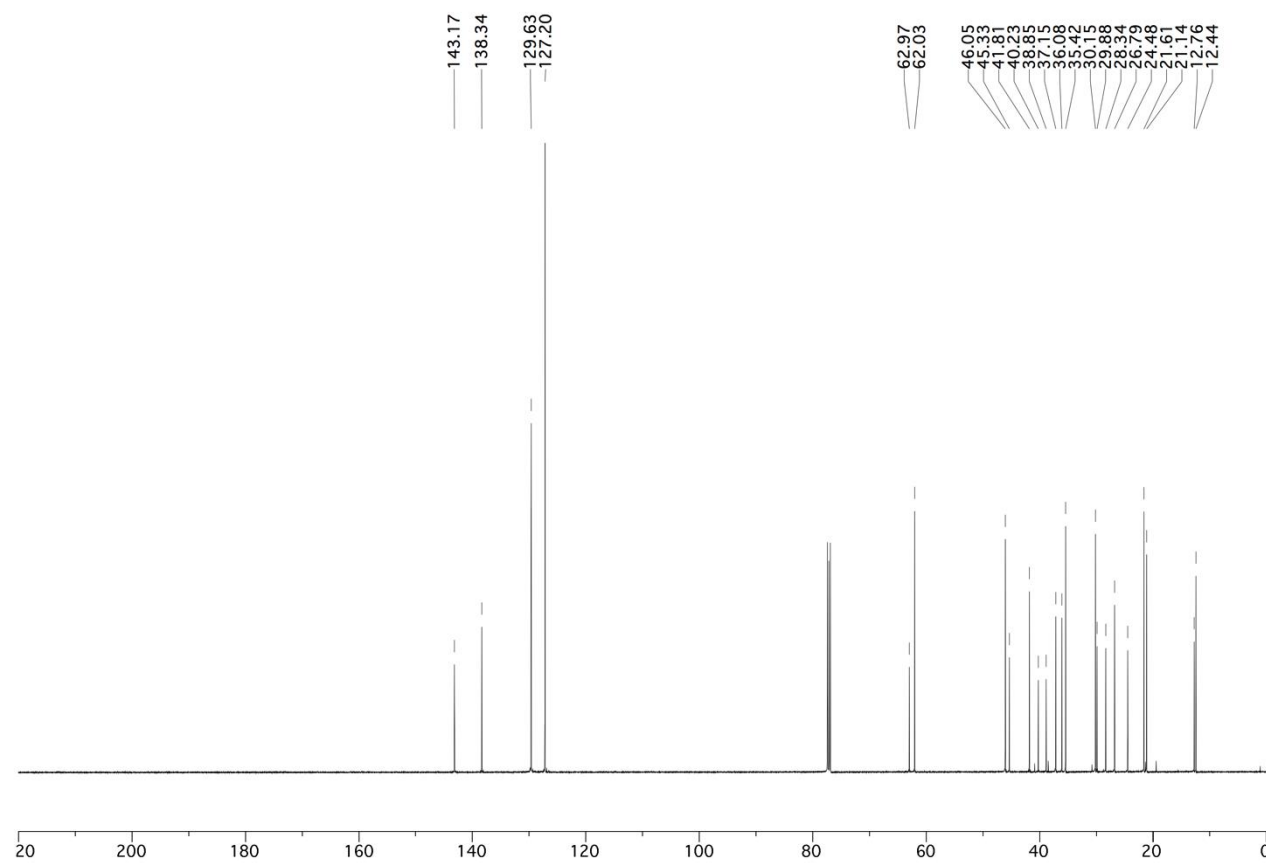

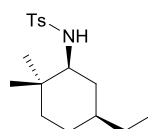

**4e-Et**

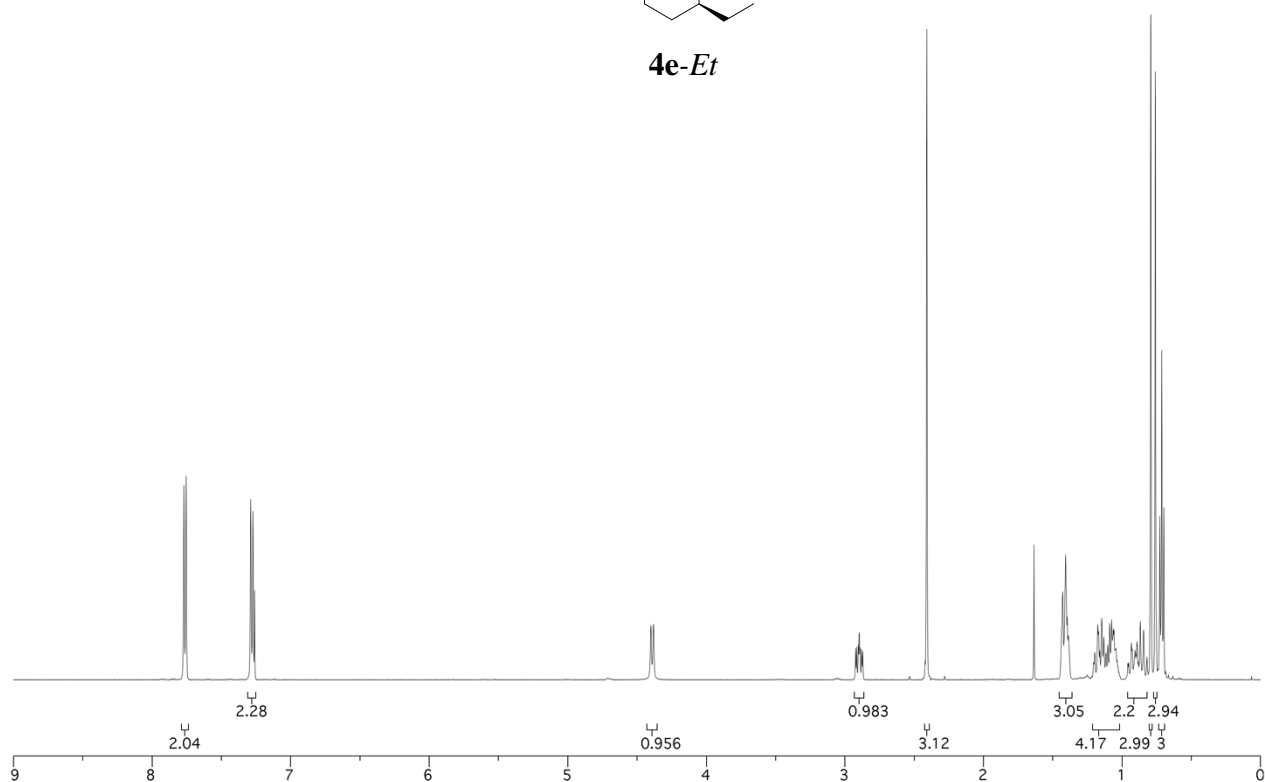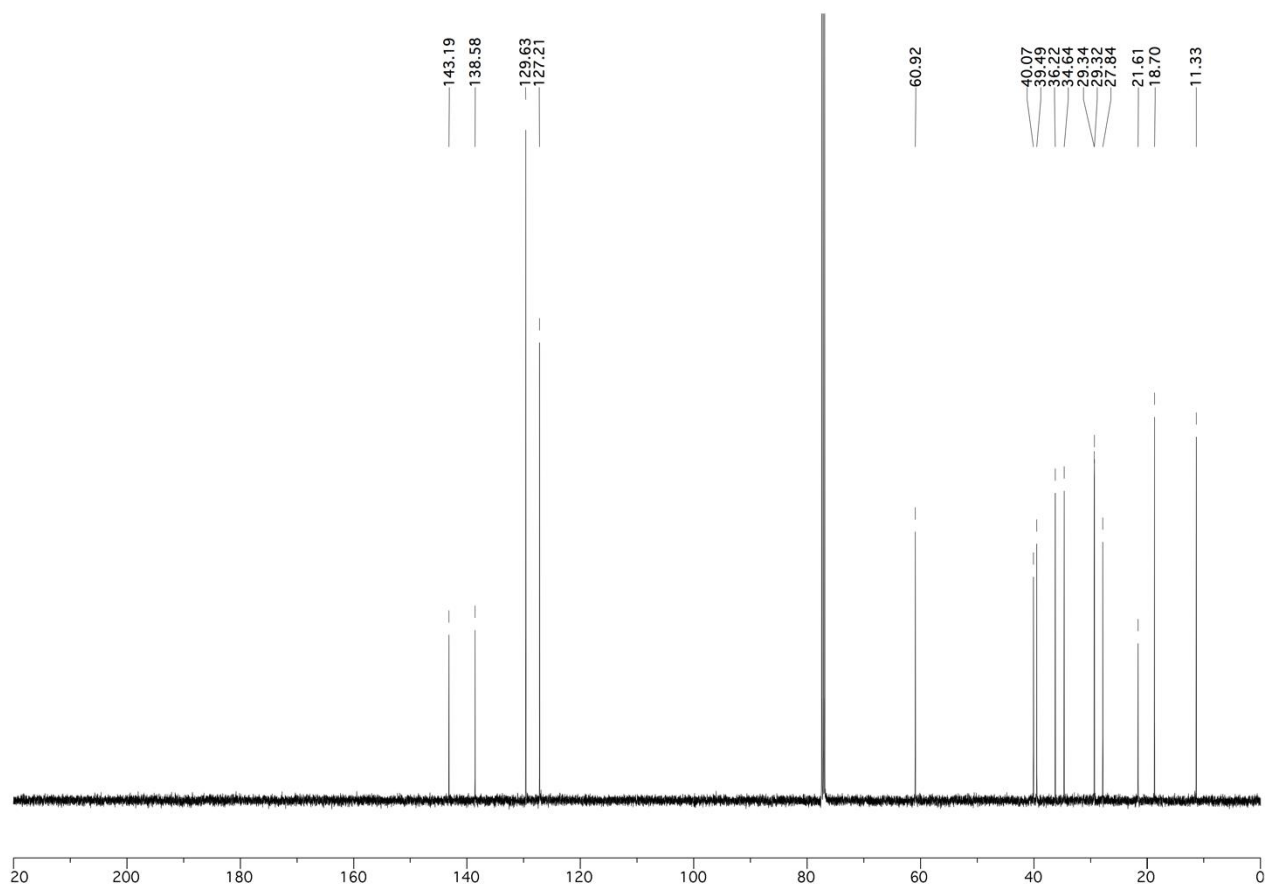

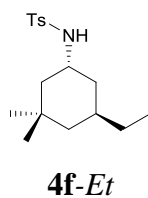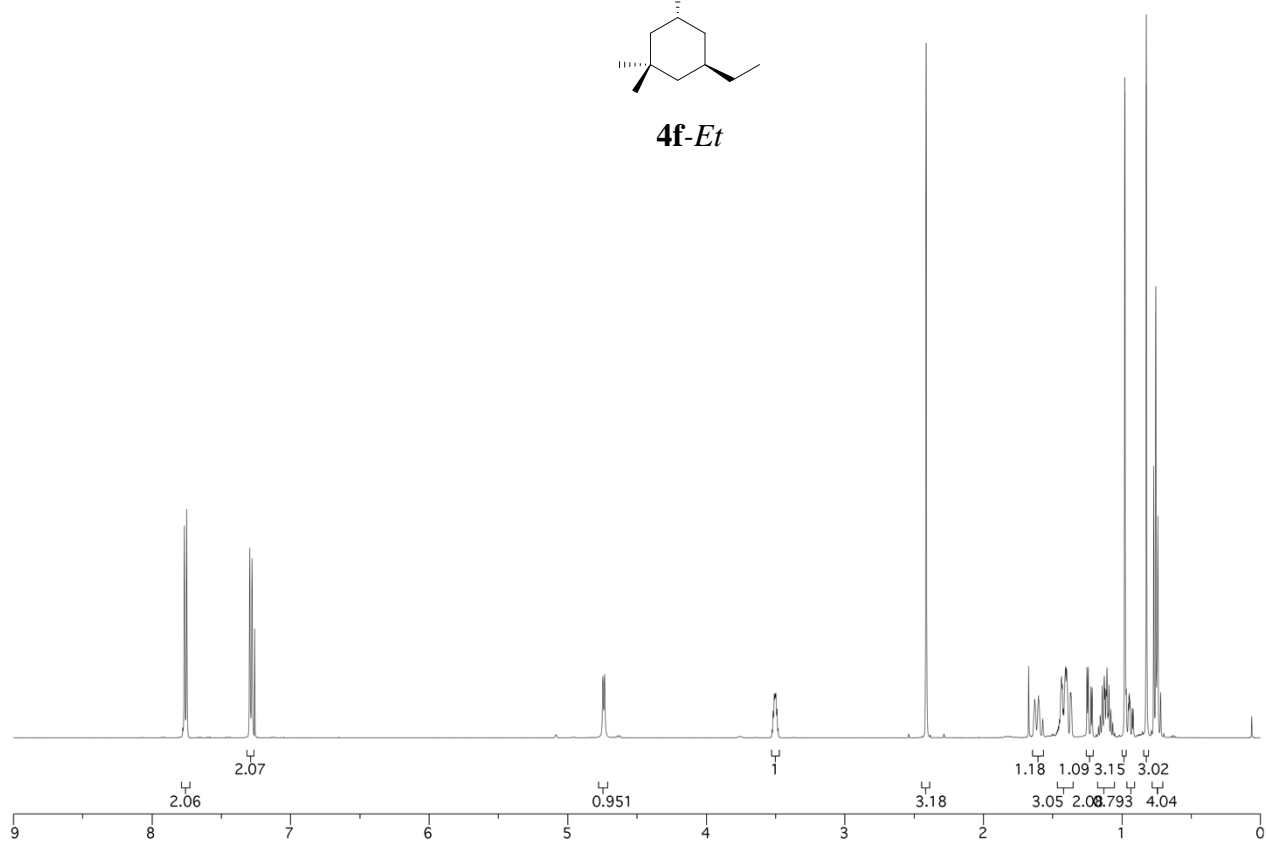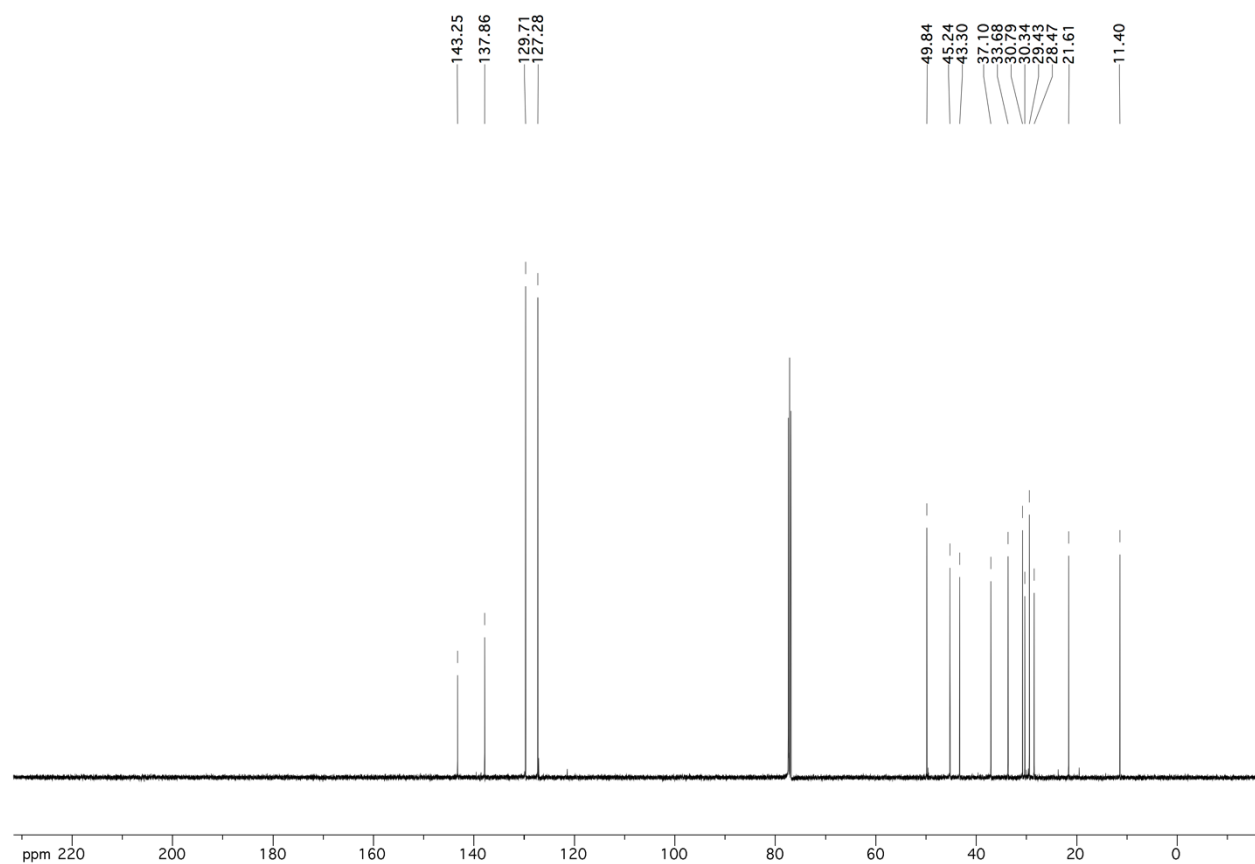

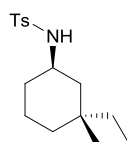

**4g-Et**, dr (*trans/cis*) 71:29

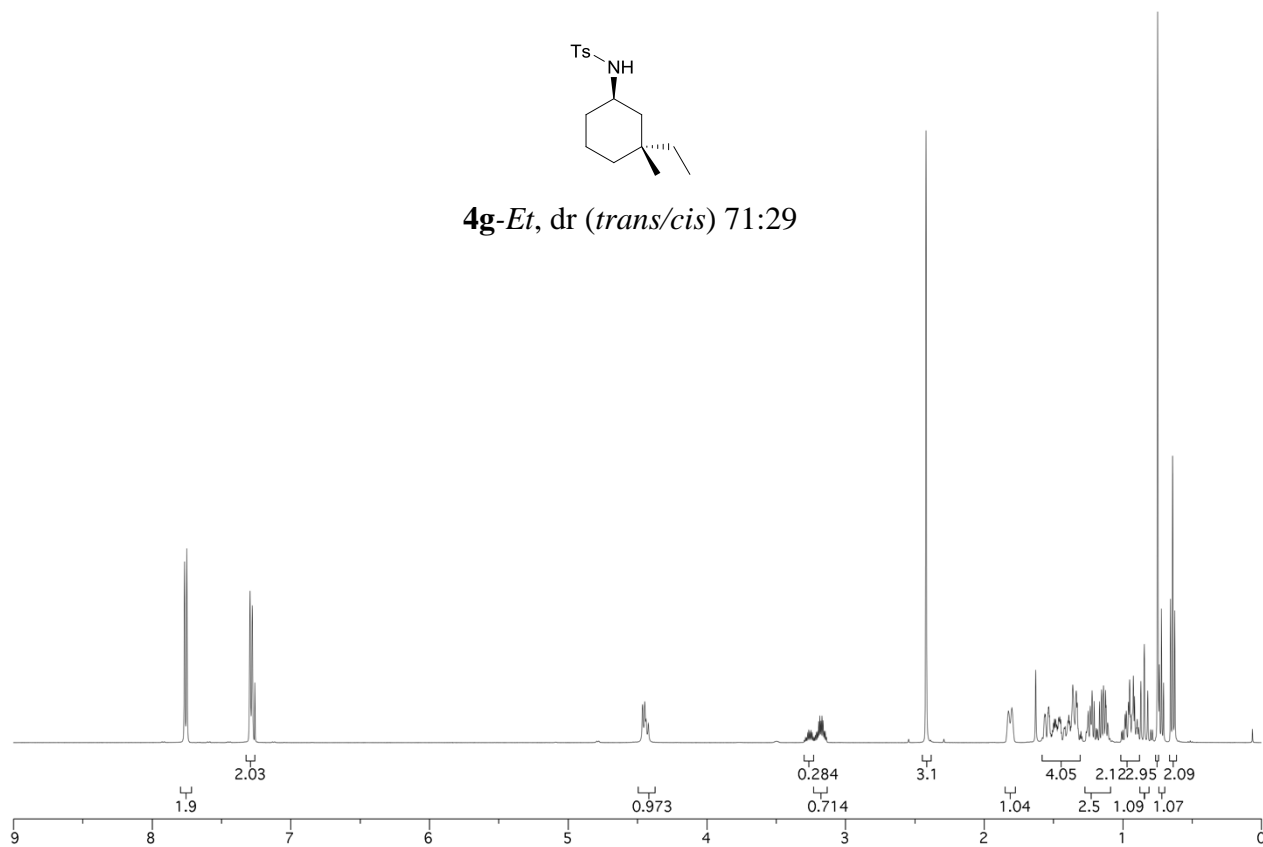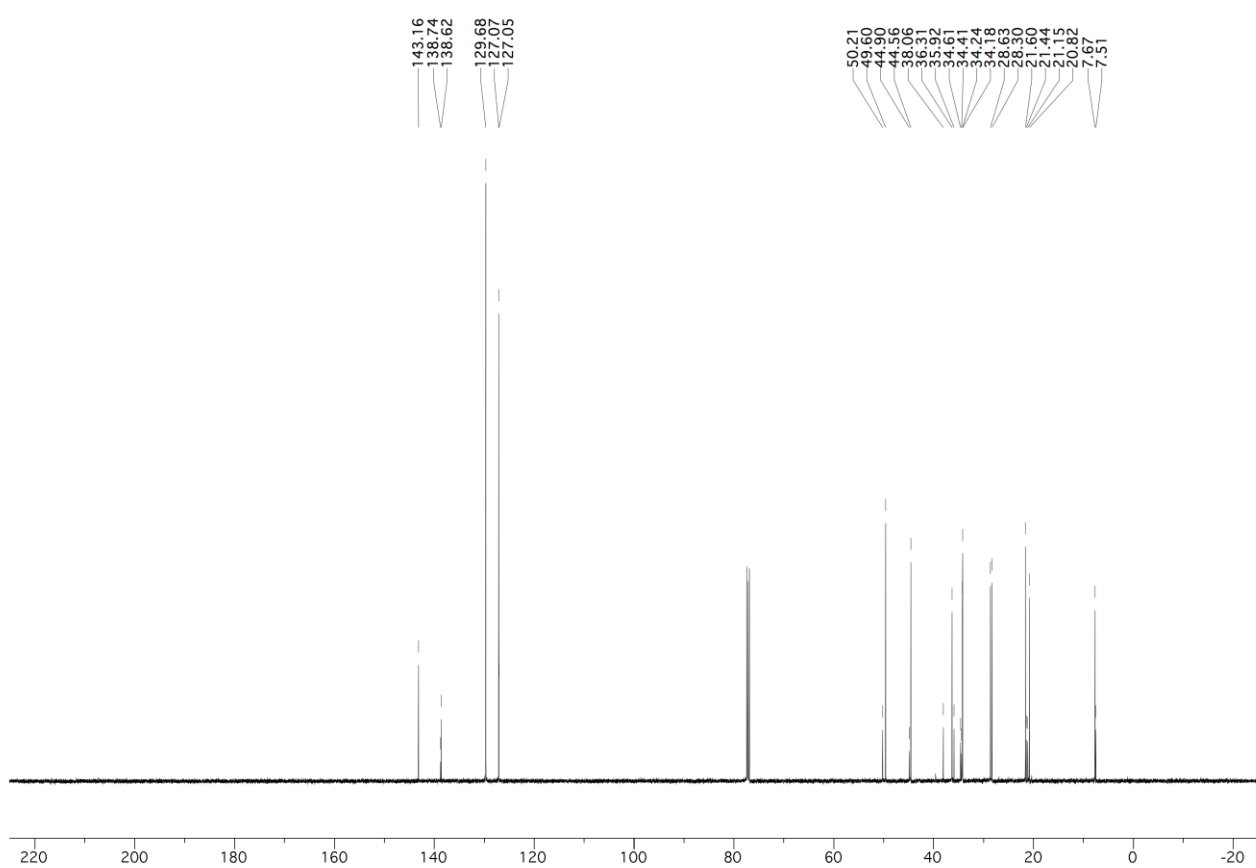



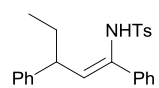

**2h-Et**

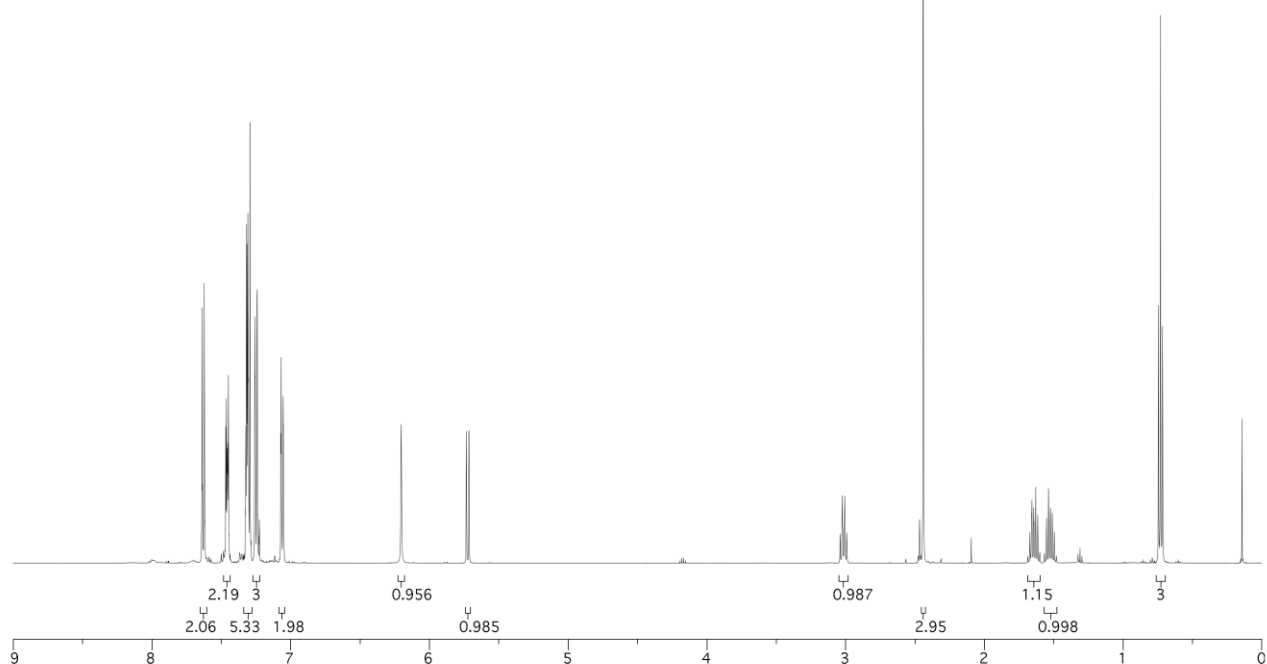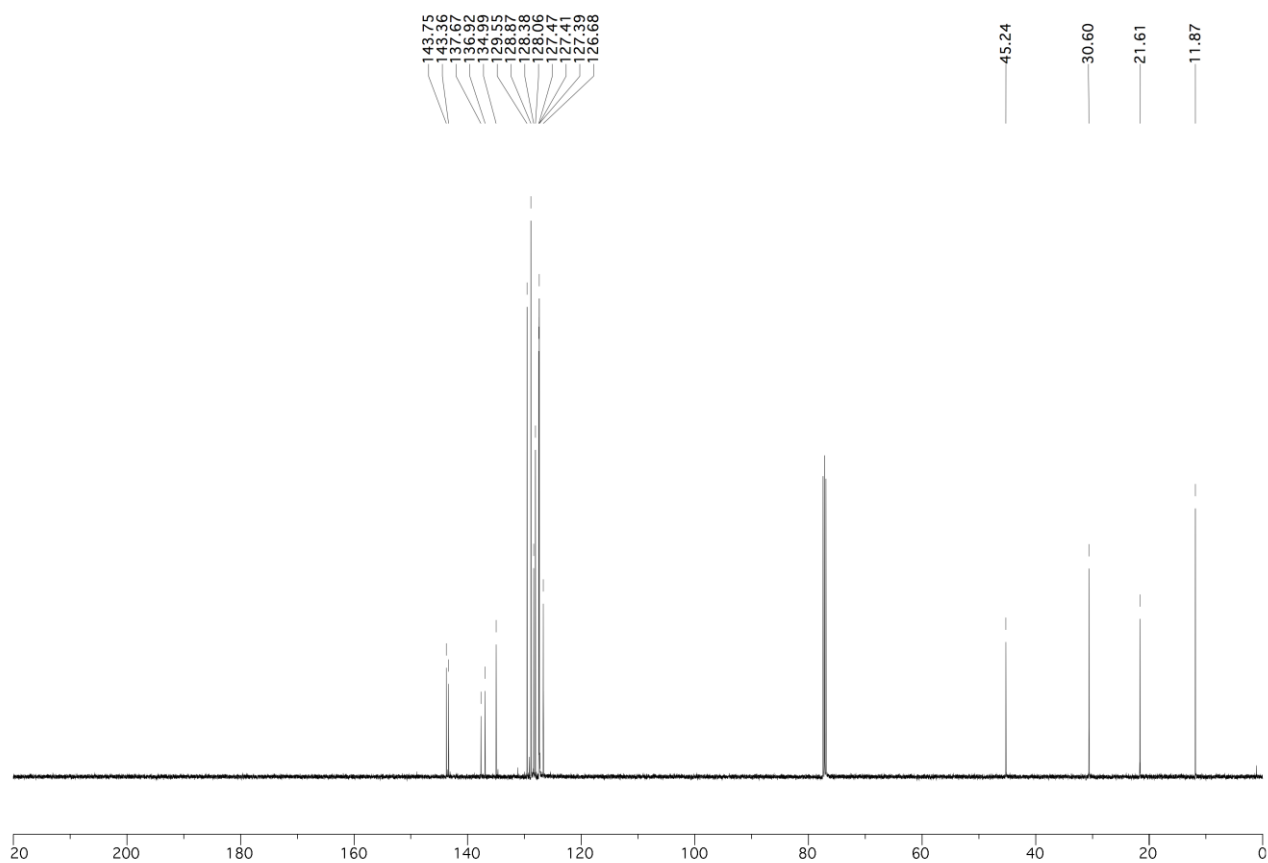

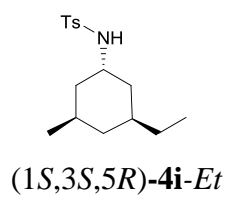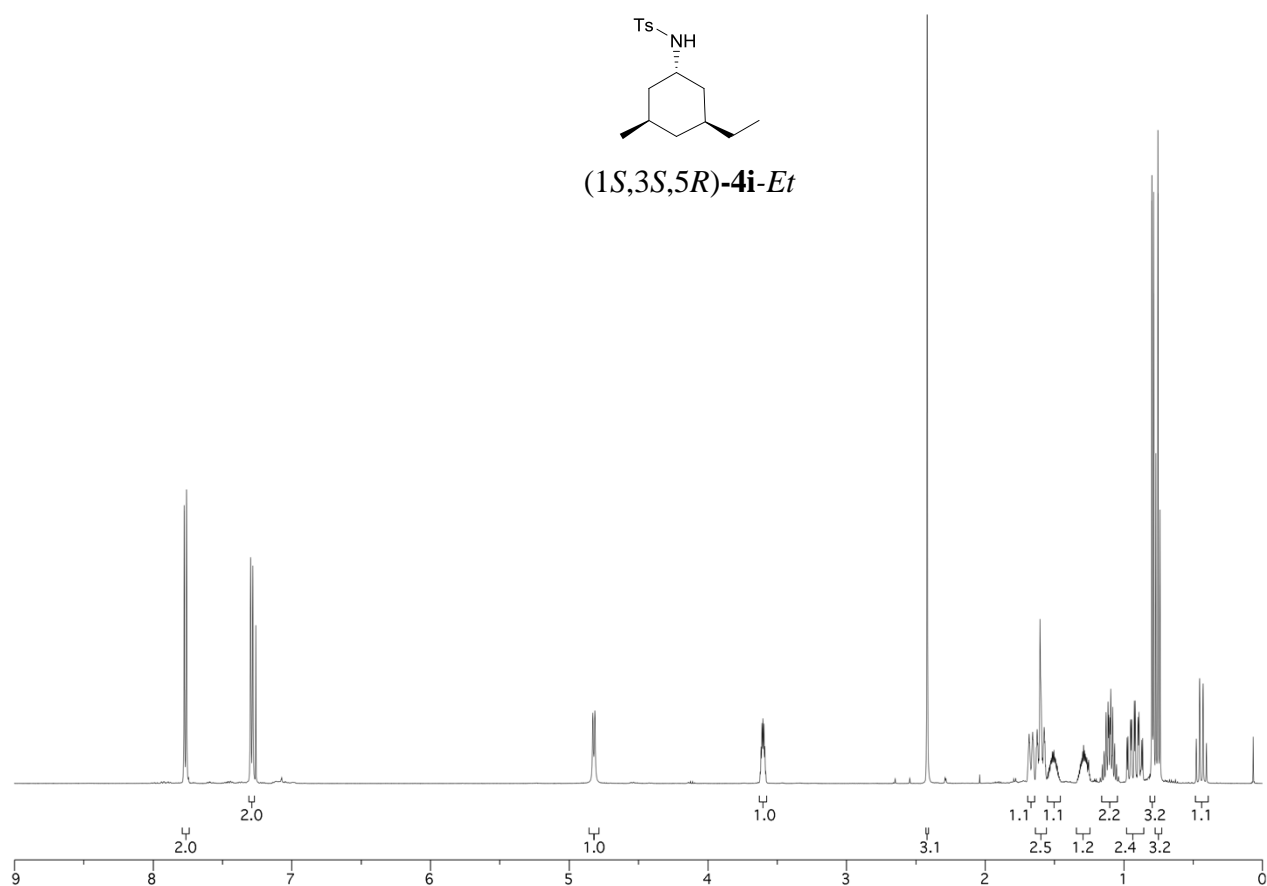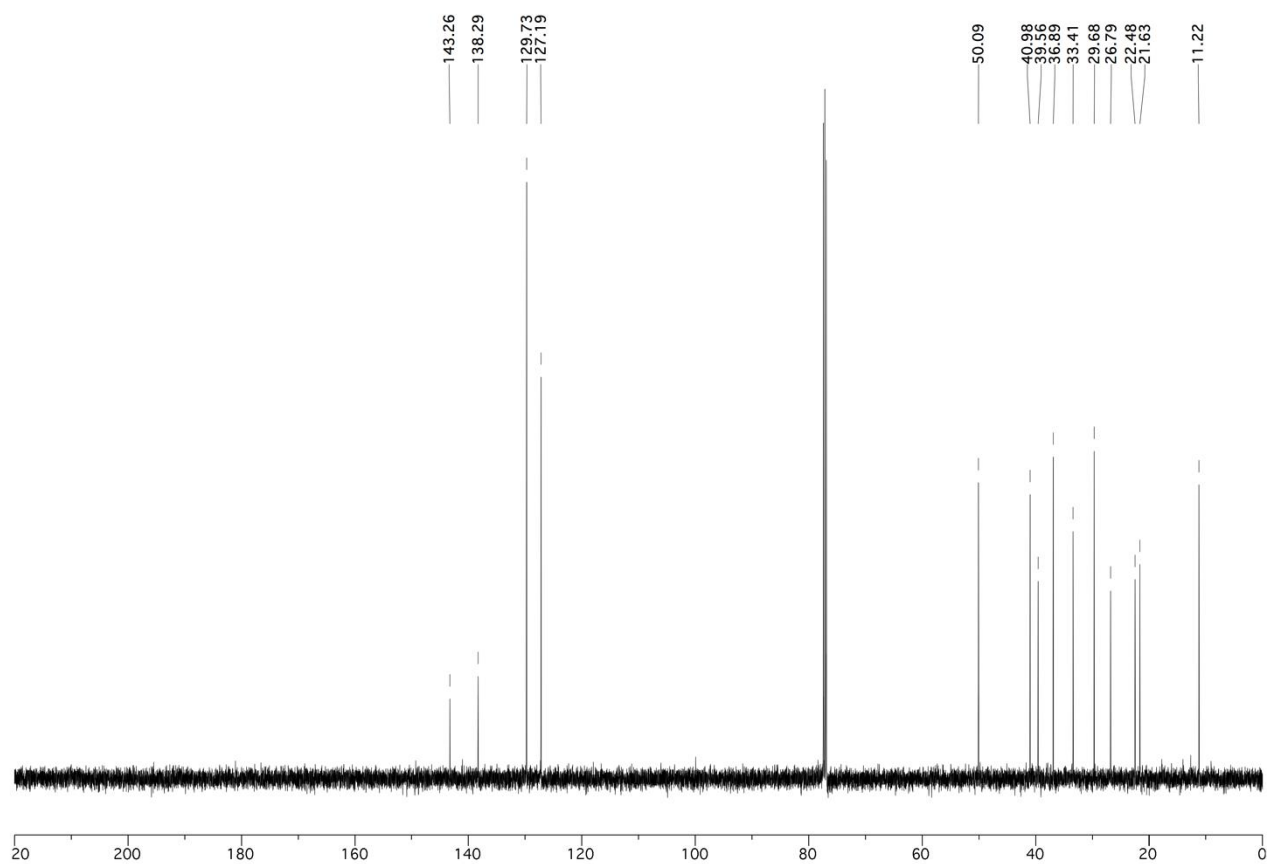

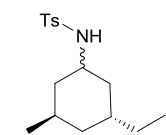

(3*R*,5*R*)-**4i**-Et

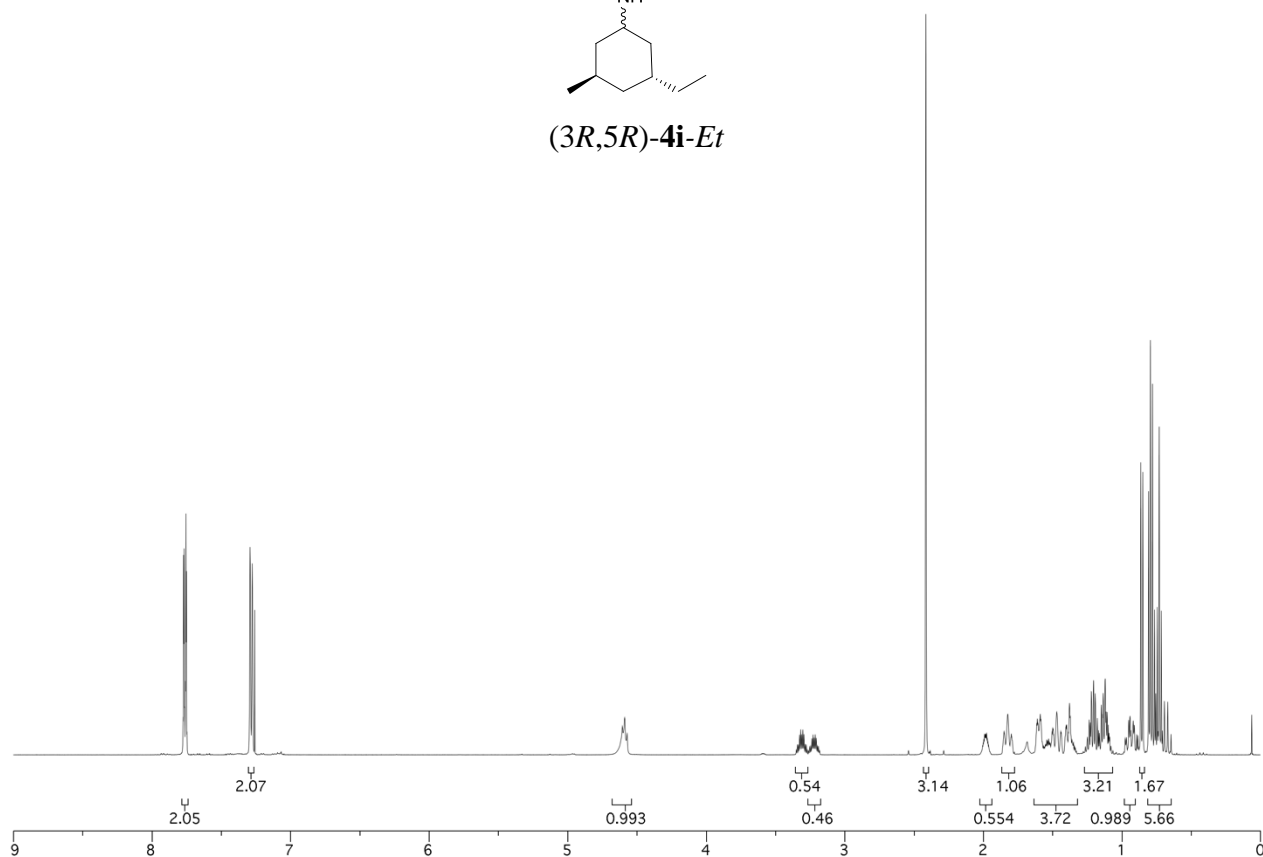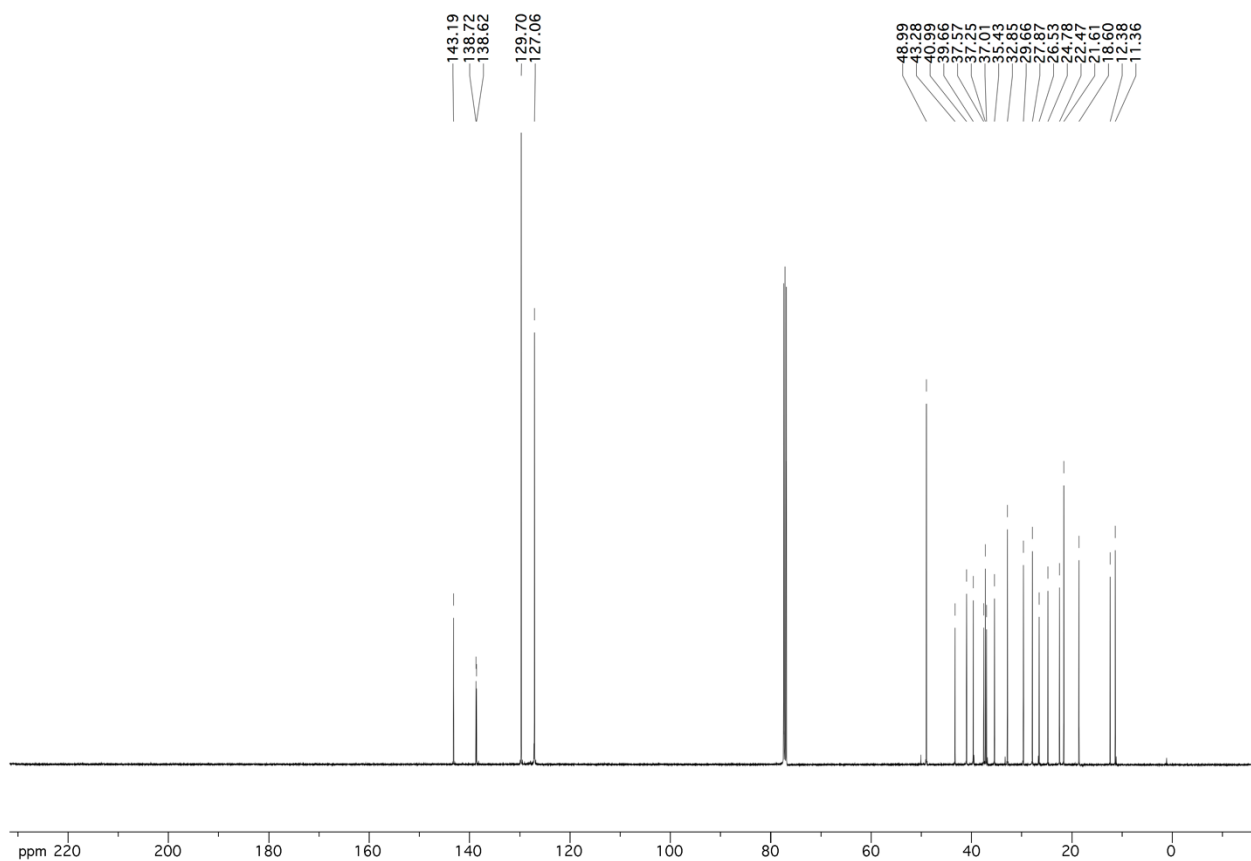

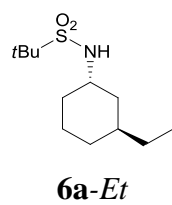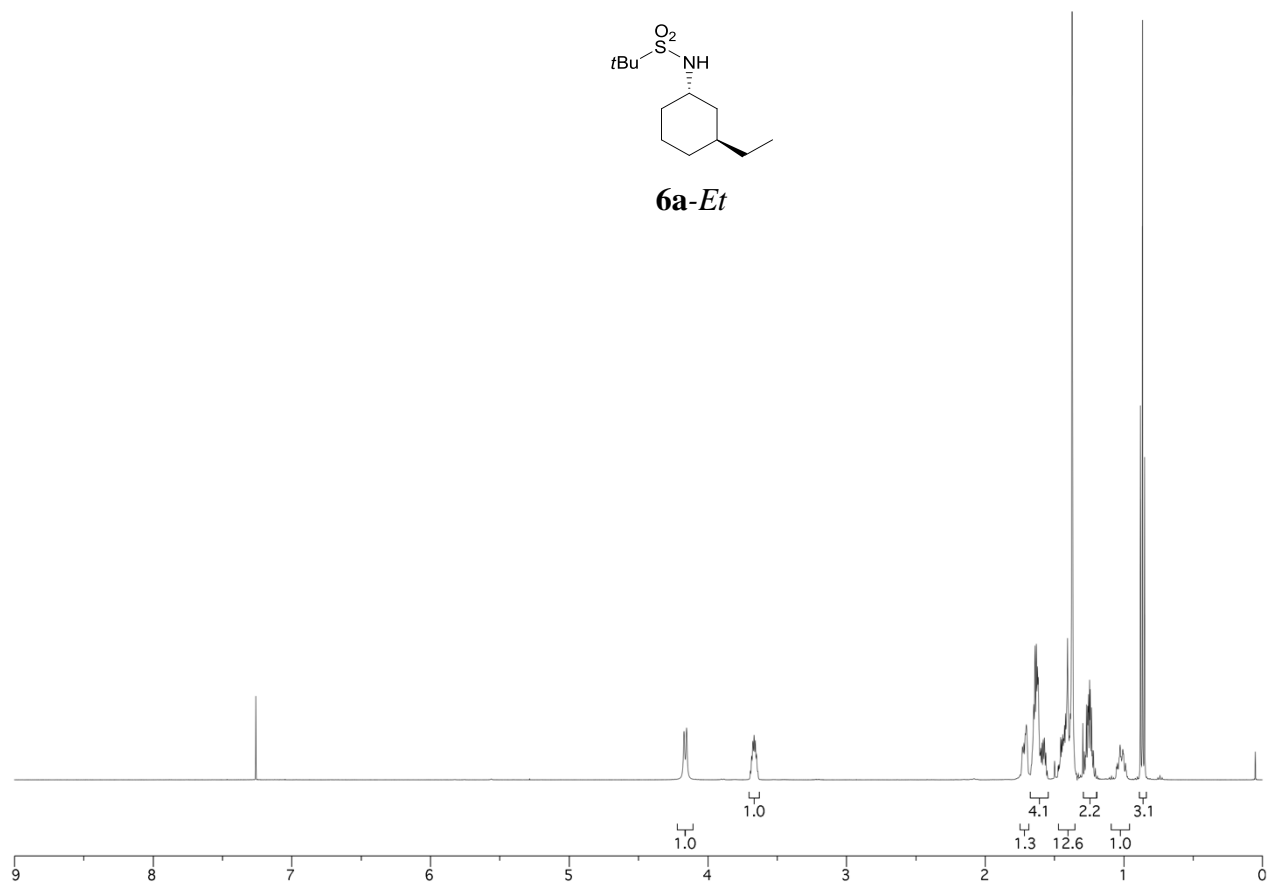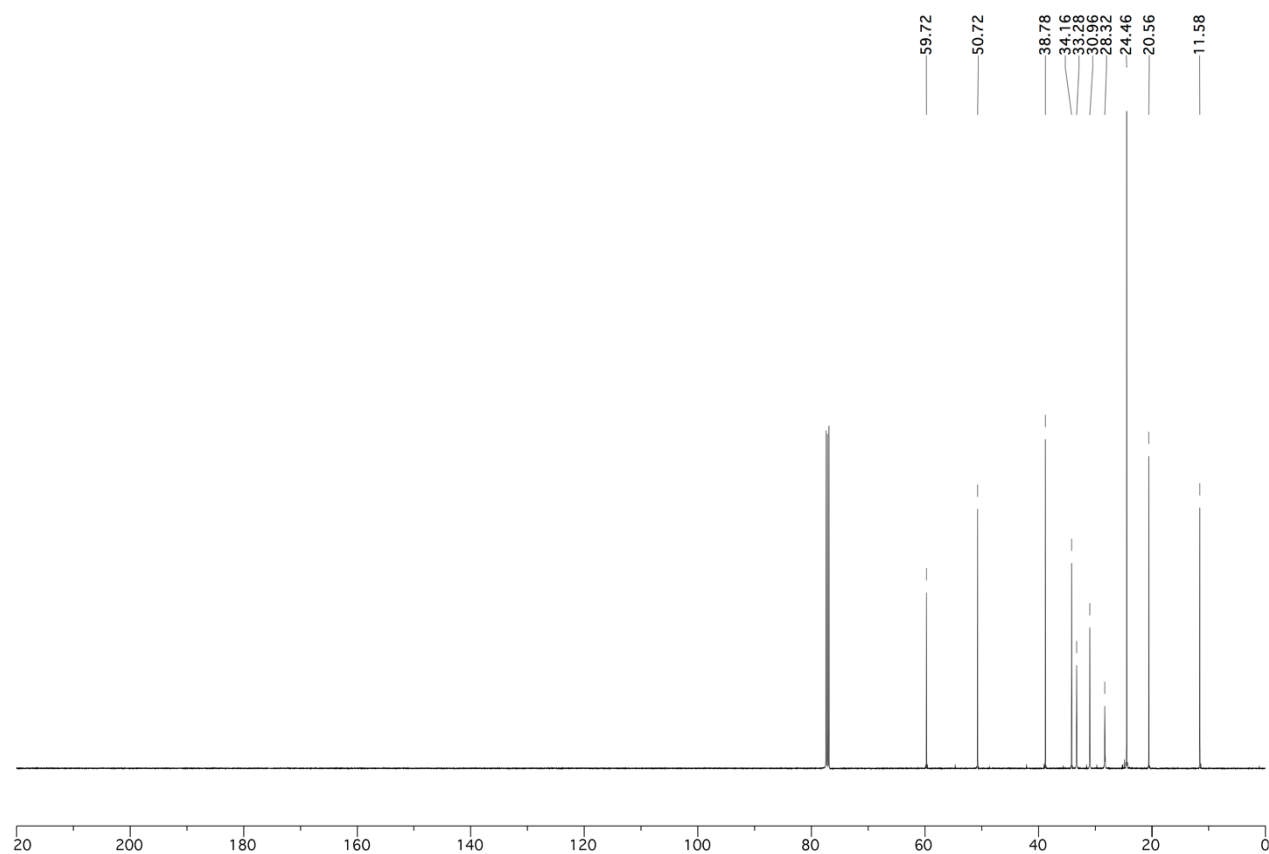

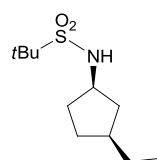

**6b-Et**

dr (*trans/cis*) 23:77

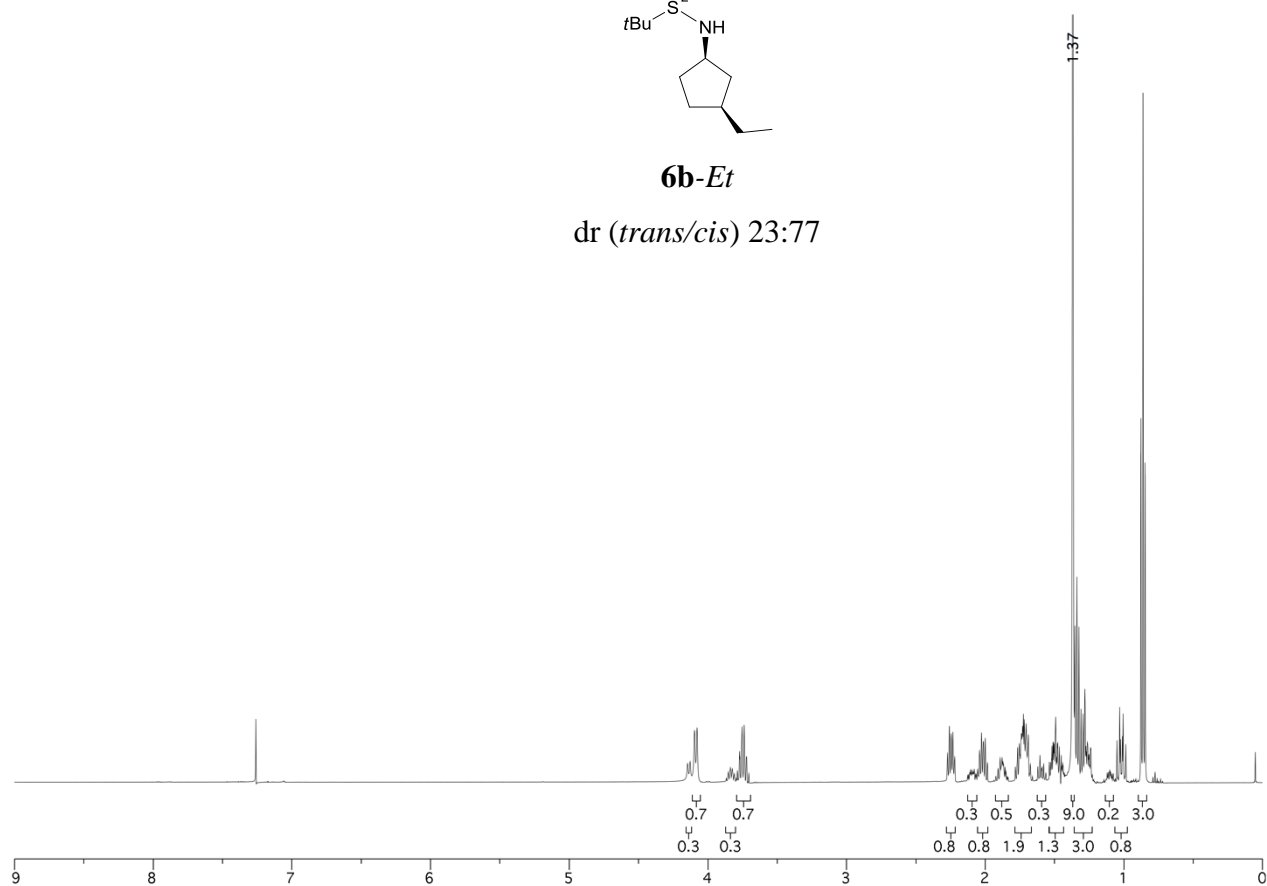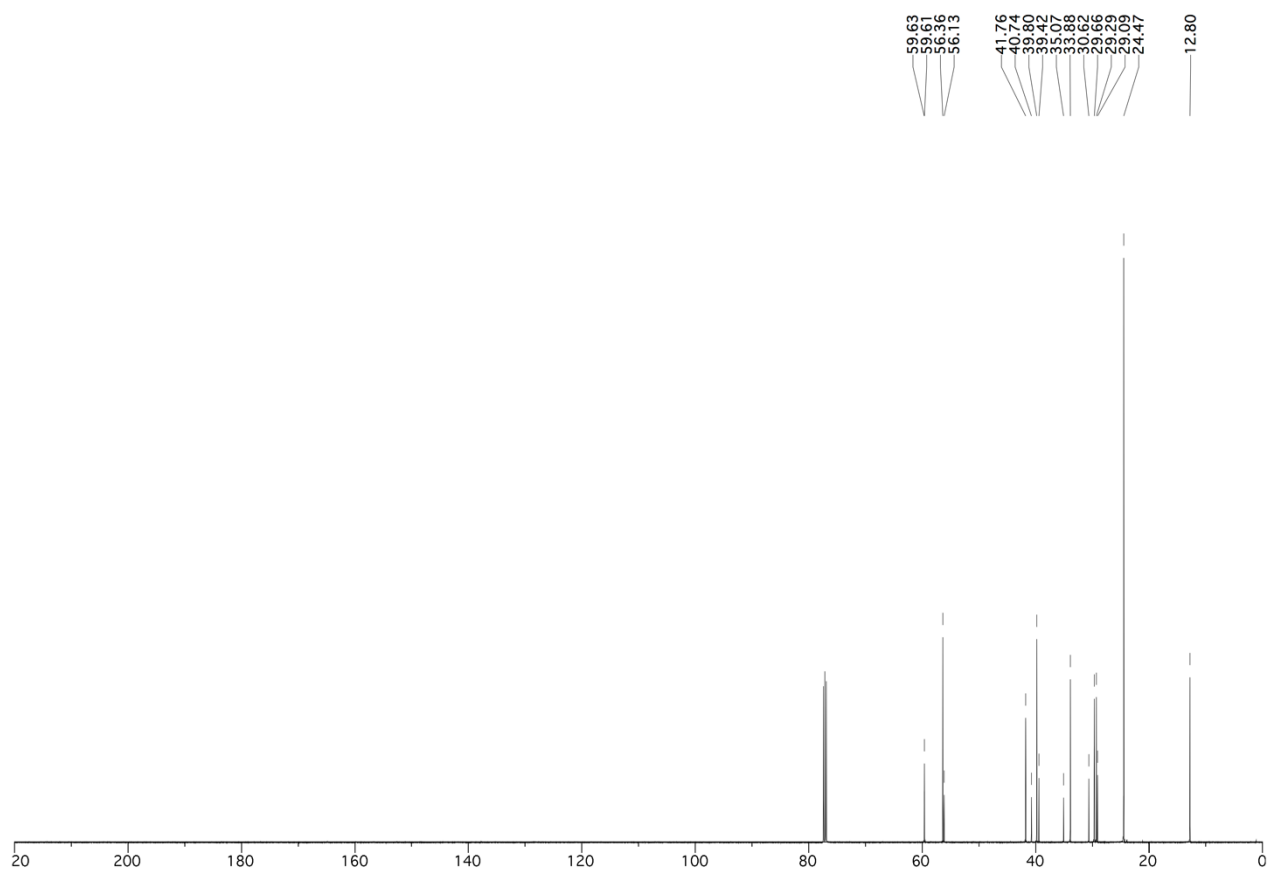

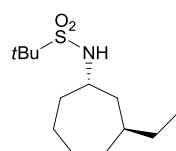

**6c-Et**

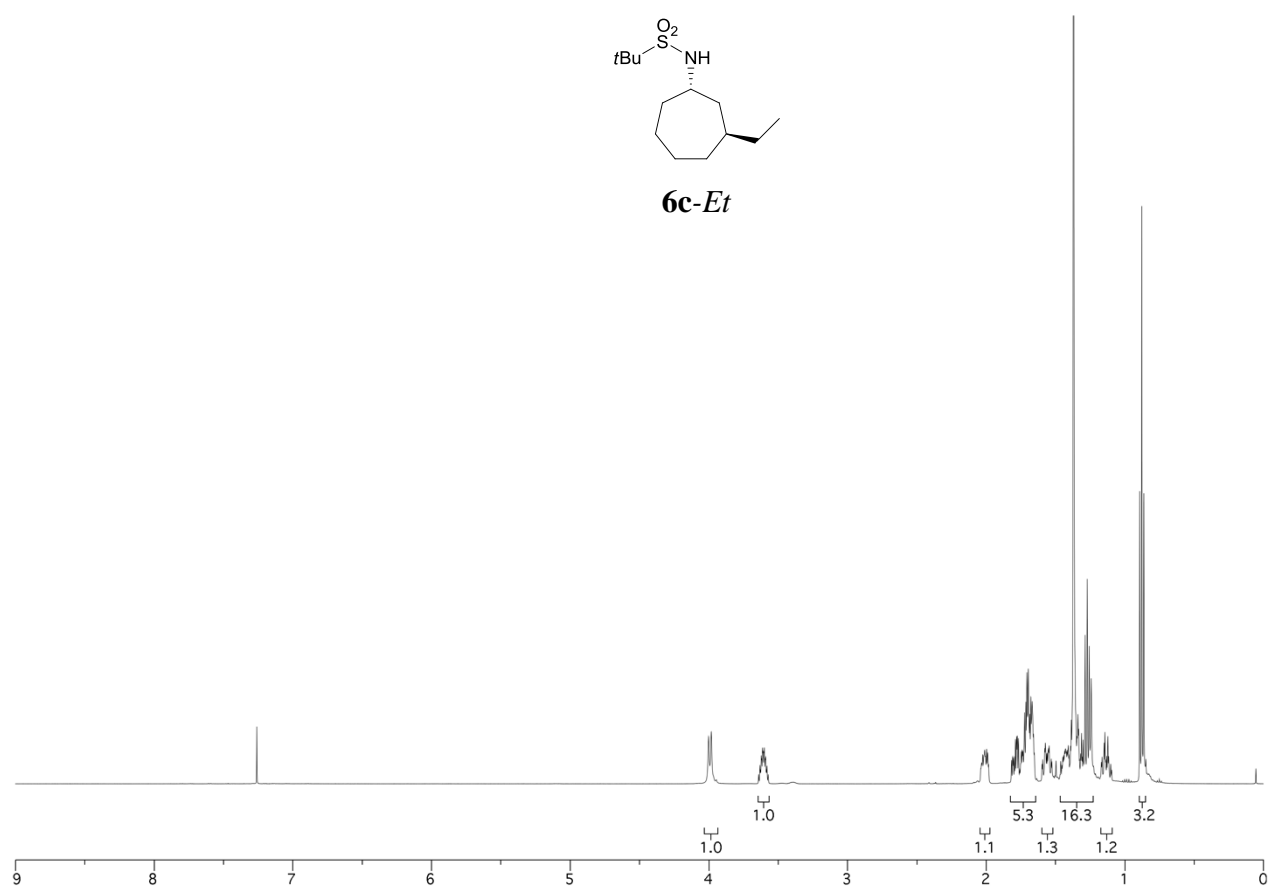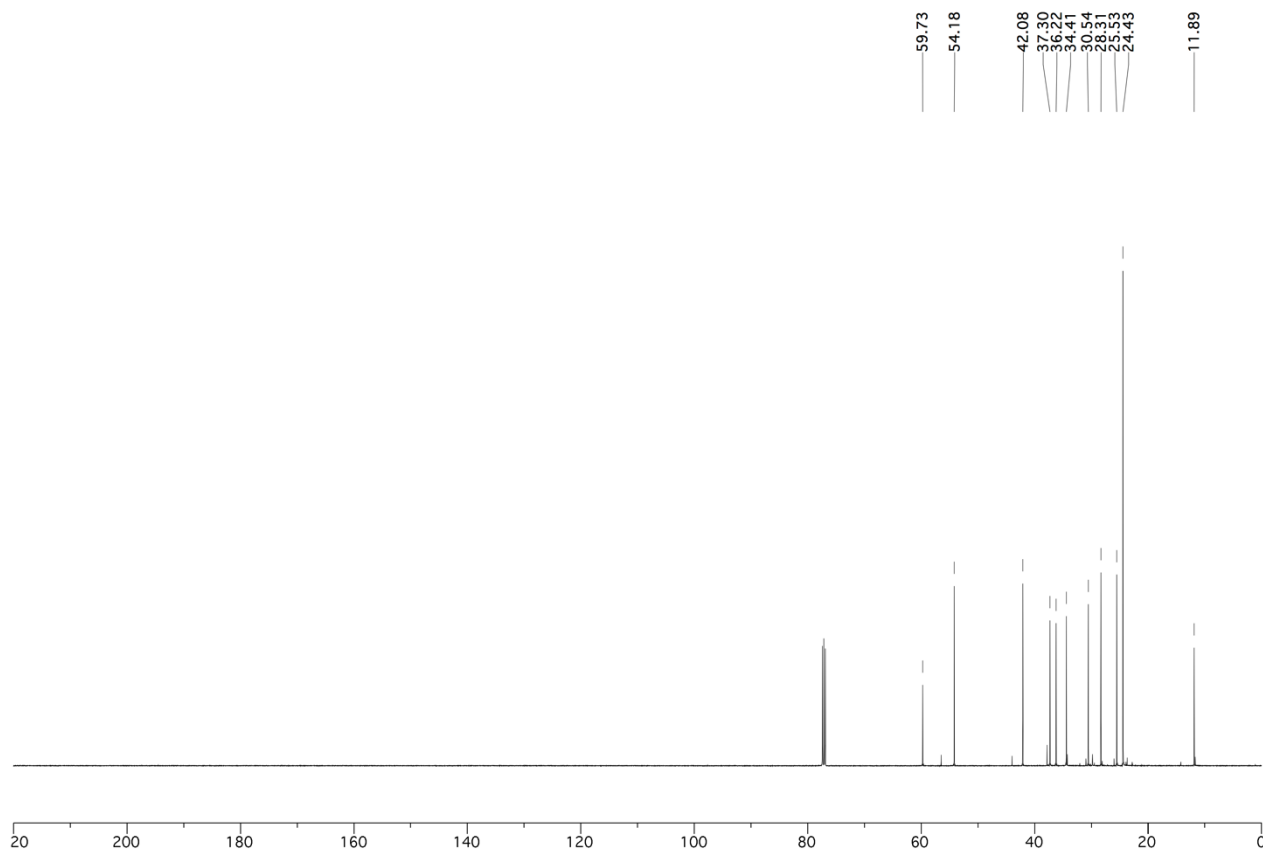

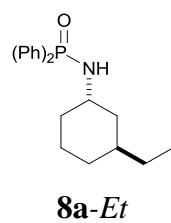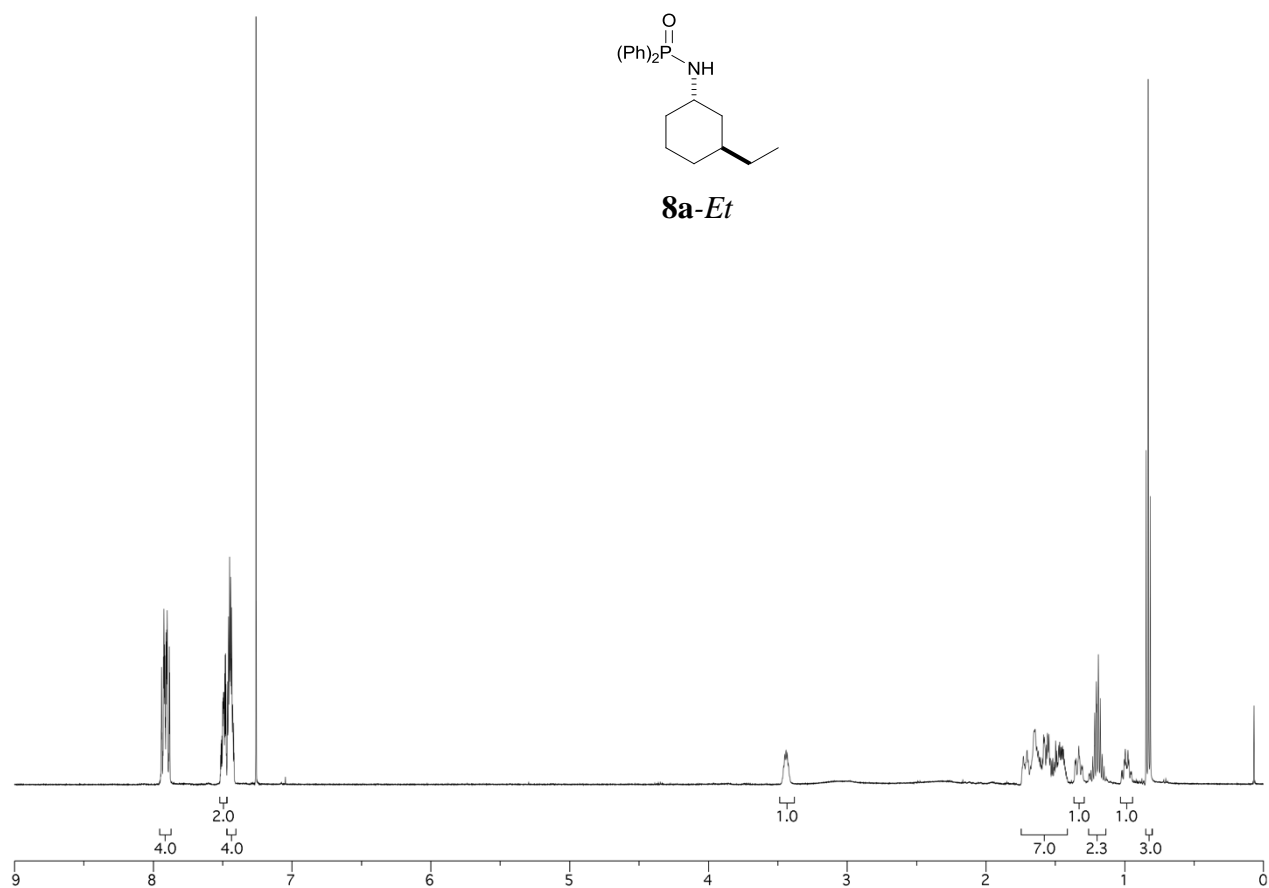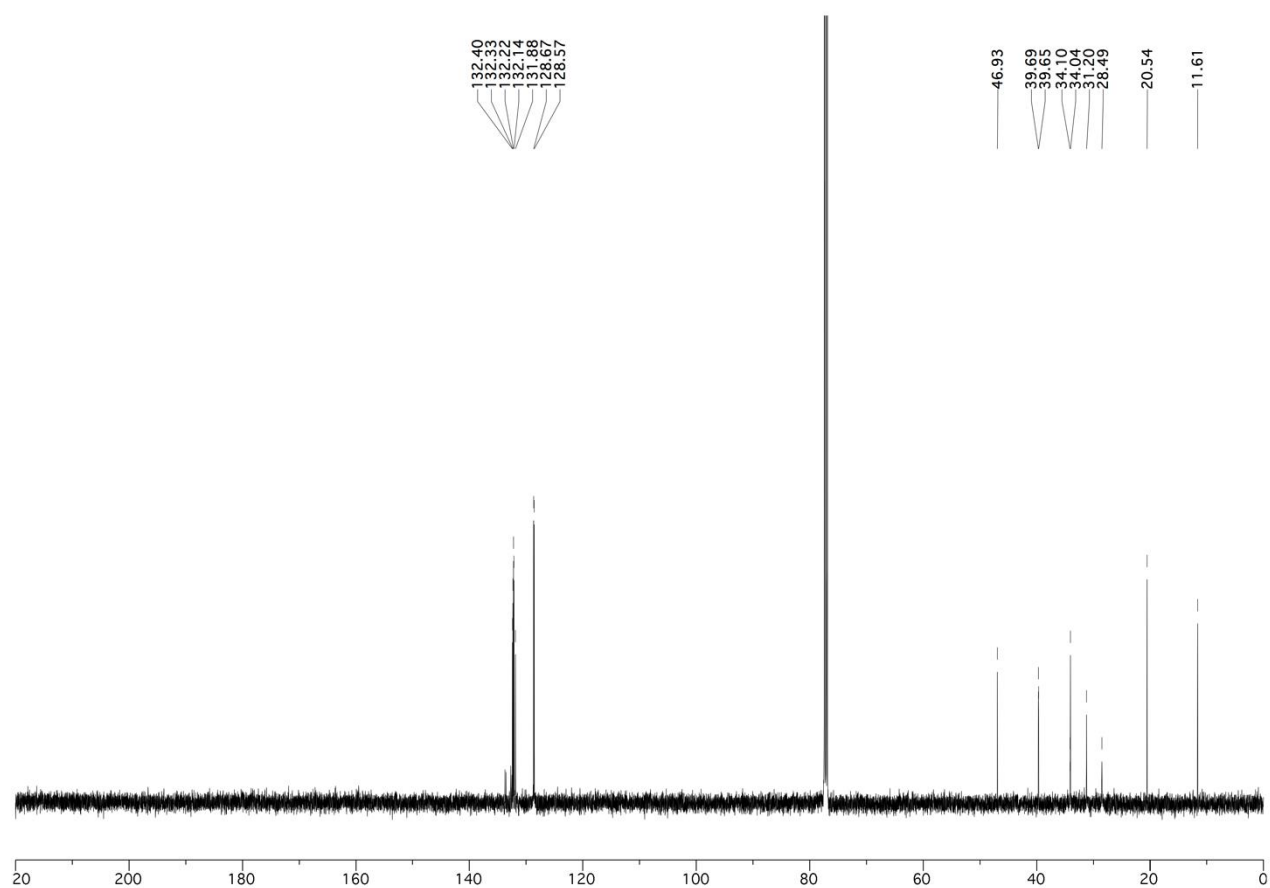

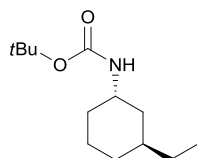

**9a-Et**

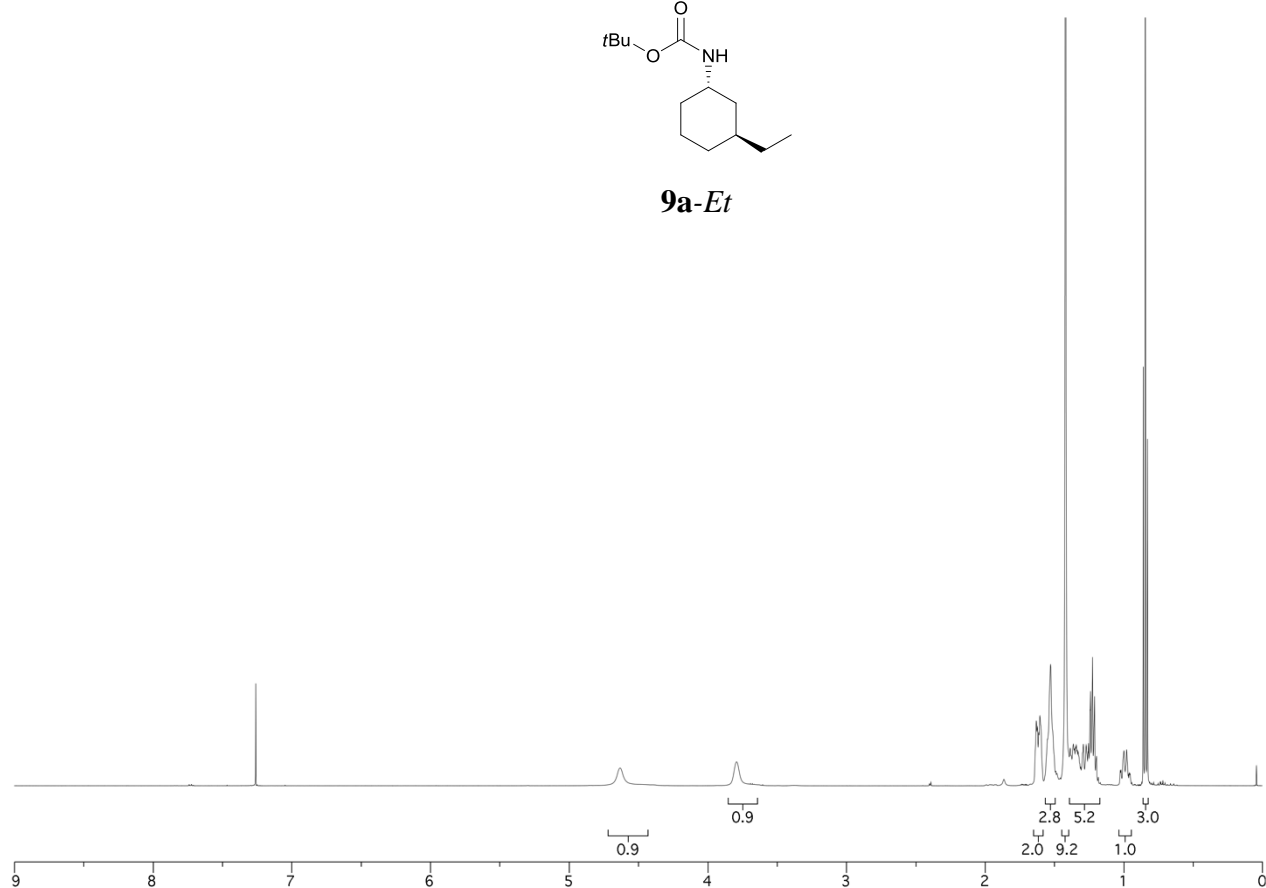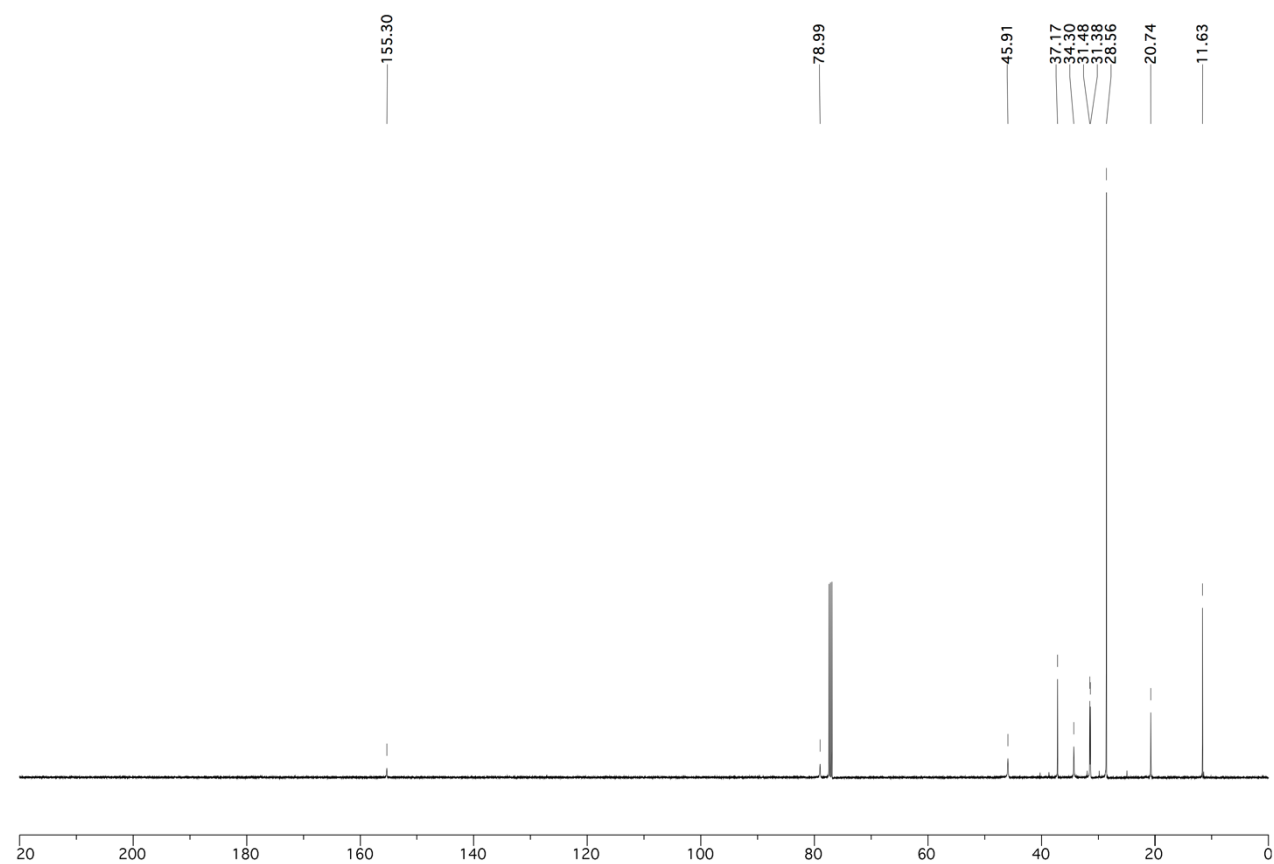



#### 4) References

- <sup>1</sup> S. Hirner, J. Westmeier, S. Gebhardt, C. H. Müller and P. von Zezschwitz, *Synlett*, 2014, **25**, 1697.
- <sup>2</sup> J. Esquivias, R. G. Arrayás and J. C. Carretero, *J. Org. Chem.*, 2005, **70**, 7451.
- <sup>3</sup> H. Bernsmann, M. van den Berg, R. Hoen, A. J. Minnaard, G. Mehler, M. T. Reetz, J. G. De Vries and B. L. Feringa, *J. Org. Chem.*, 2005, **70**, 943.
- <sup>4</sup> L. A. Arnold, R. Imbos, A. Mandoli, A. H. M. de Vries, R. Naasz and B. L. Feringa, *Tetrahedron*, 2000, **56**, 2865.
- <sup>5</sup> N. Uematsu, A. Fujii, S. Hashiguchi, T. Ikariya and R. Noyori, *J. Am. Chem. Soc.*, 1996, **118**, 4916.
- <sup>6</sup> S. Zhang, D. Zhang and L. S. Liebeskind, *J. Org. Chem.*, 1997, **62**, 2312.
- <sup>7</sup> B. L. Feringa, M. Pineschi, L. A. Arnold, R. Imbos and A. H. M. De Vries, *Angew. Chem. Int. Ed. Engl.*, 1997, **36**, 2620.
- <sup>8</sup> S. Hirner, A. Kolb, J. Westmeier, S. Gebhardt, S. Middel, K. Harms and P. von Zezschwitz, *Org. Lett.*, 2014, **16**, 3162.
